# Supplementary material
Source: publisher site journal article supplement (https://www.dovepress.com/article/458637)
Supplement: Supplementary file 1 [file get_supplementary_file.php]

**Supplementary Figure 1** The negative outcomes of the forward MR analysis obtained through the IVW method with CIPs as exposures and OSA as outcomes.


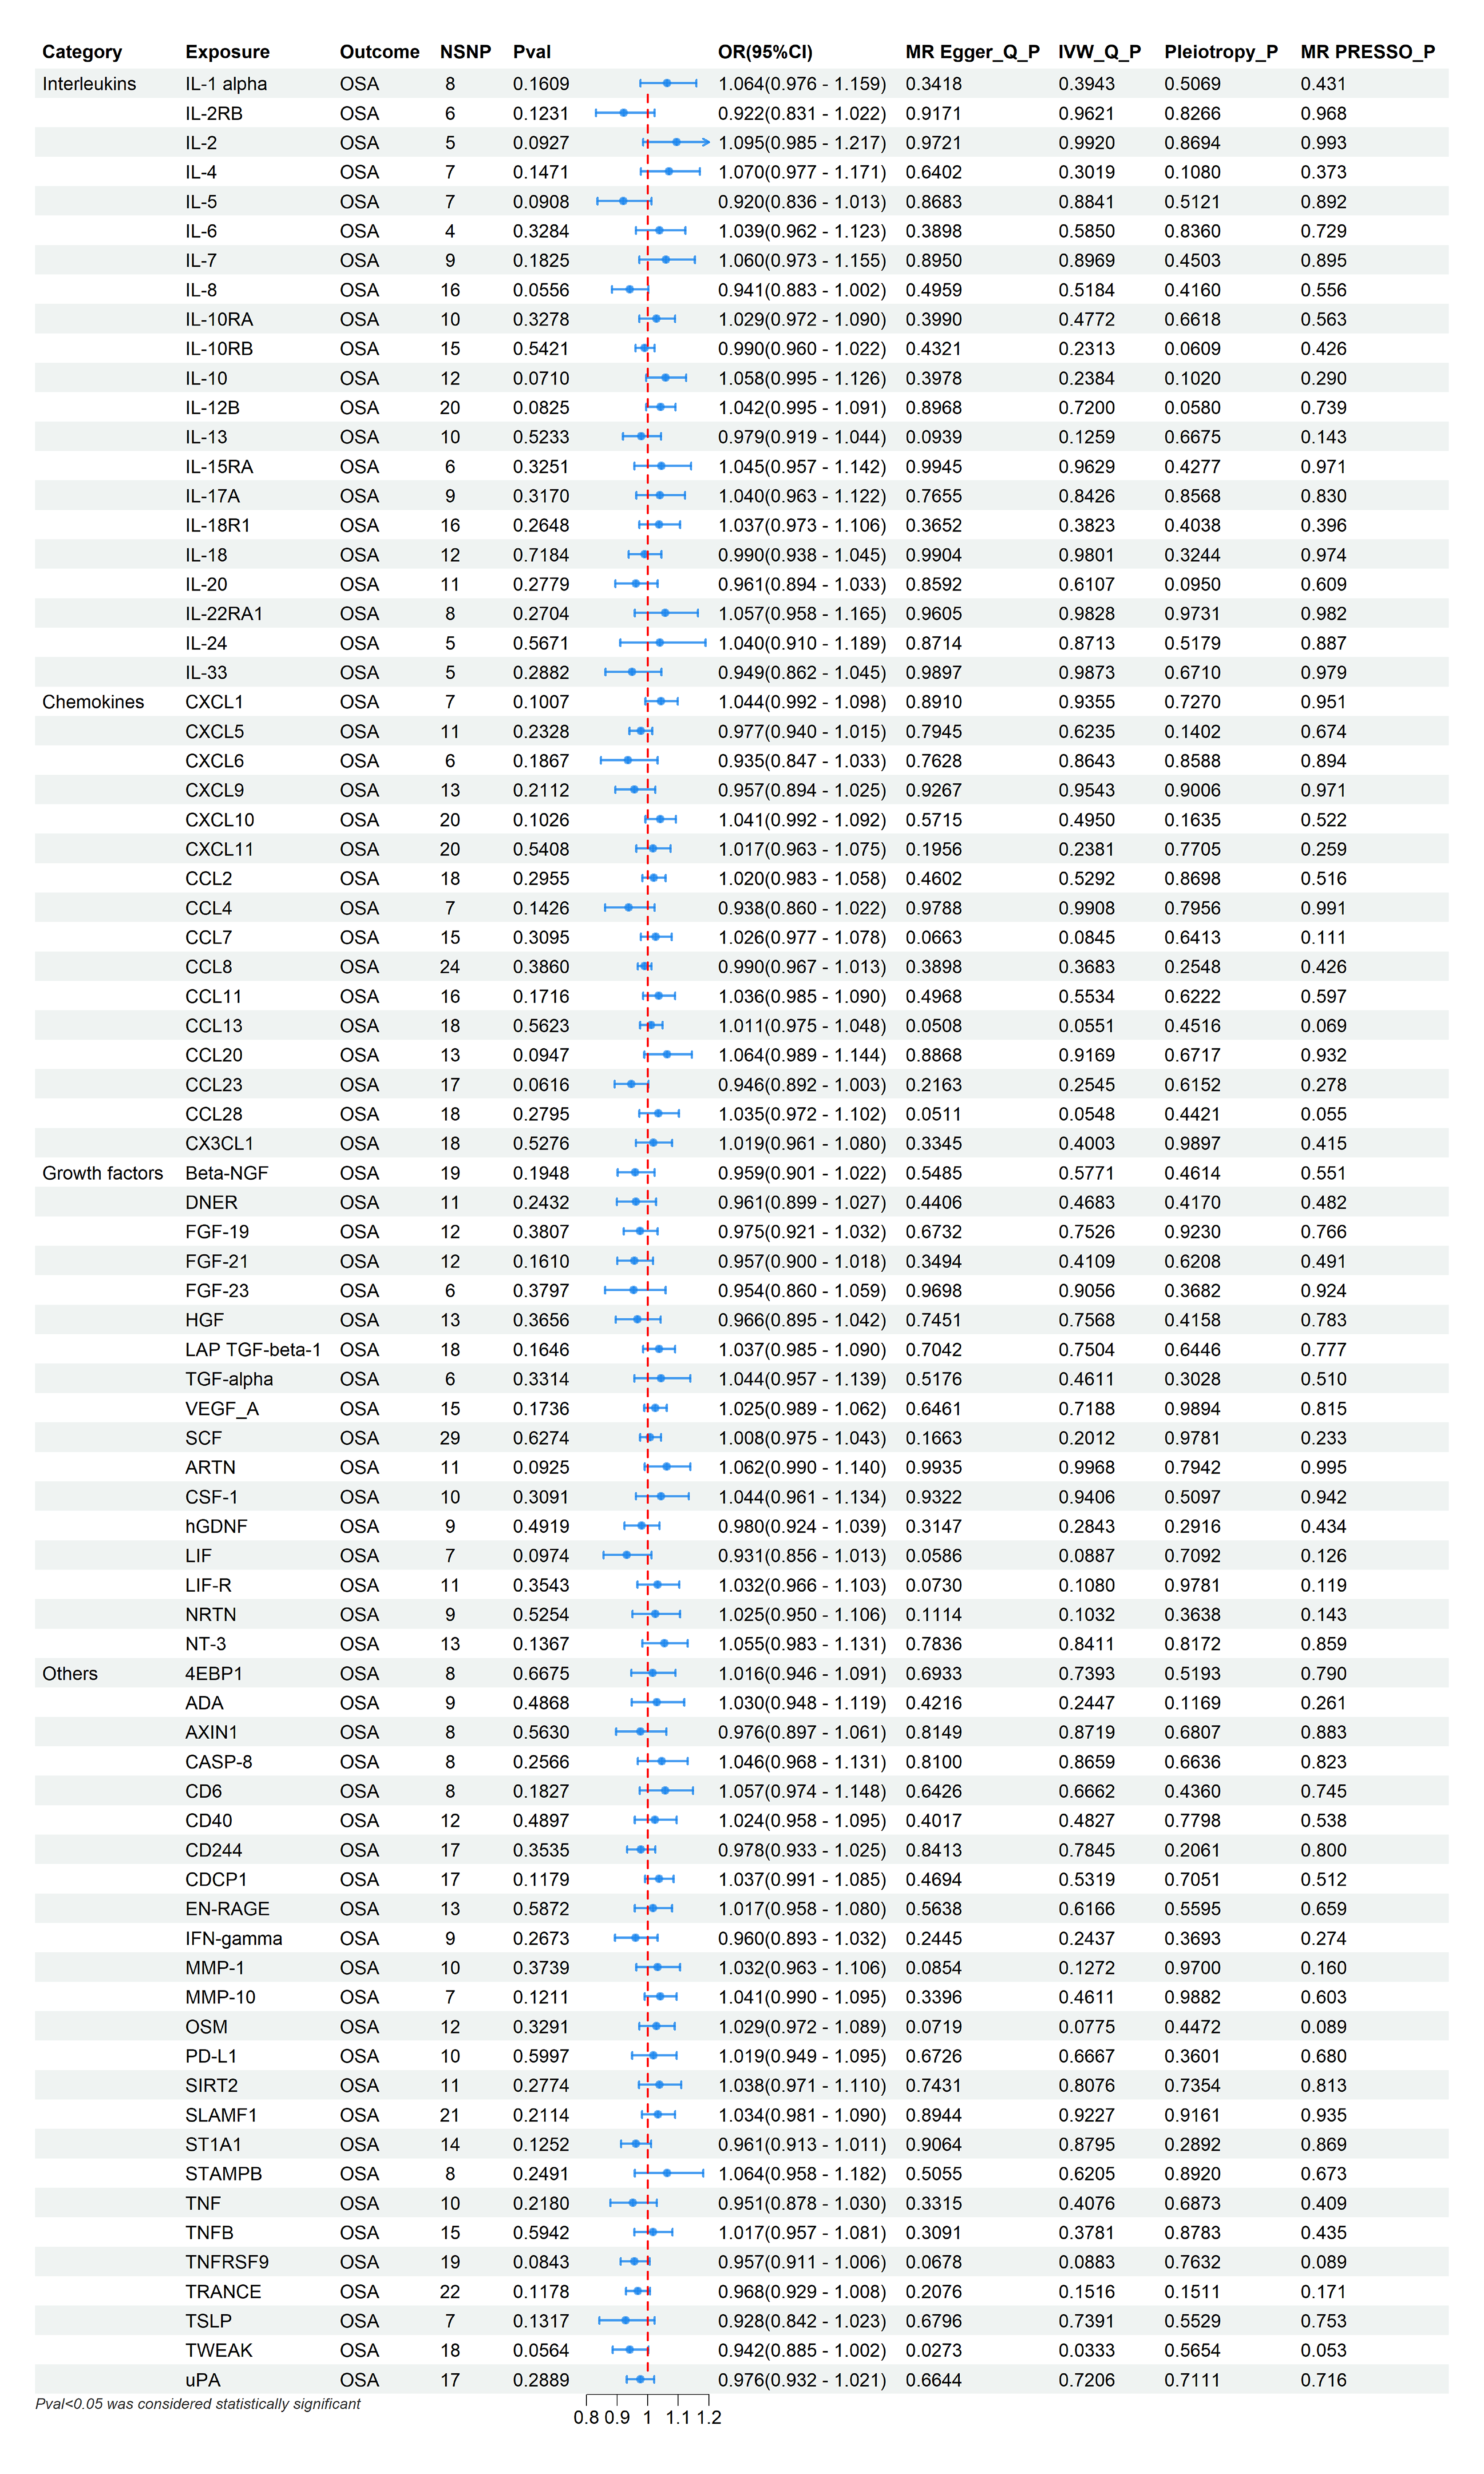


**Notes:** NSNP, the number of SNPs used in the analysis; MR Egger_Q_P, The P-value from the Cochran Q test computed using the MR Egger method; IVW_Q_P, The P-value from the Cochran Q test computed using the IVW method; Pleiotropy_P, the P-value of the MR-Egger regression intercept hypothesis test; MR PRESSO_P, the P-value of the horizontal pleiotropy test in MR-PRESSO.

**Supplementary Figure 2** Forest plots of MR analyses between 12 CIPs and OSA.


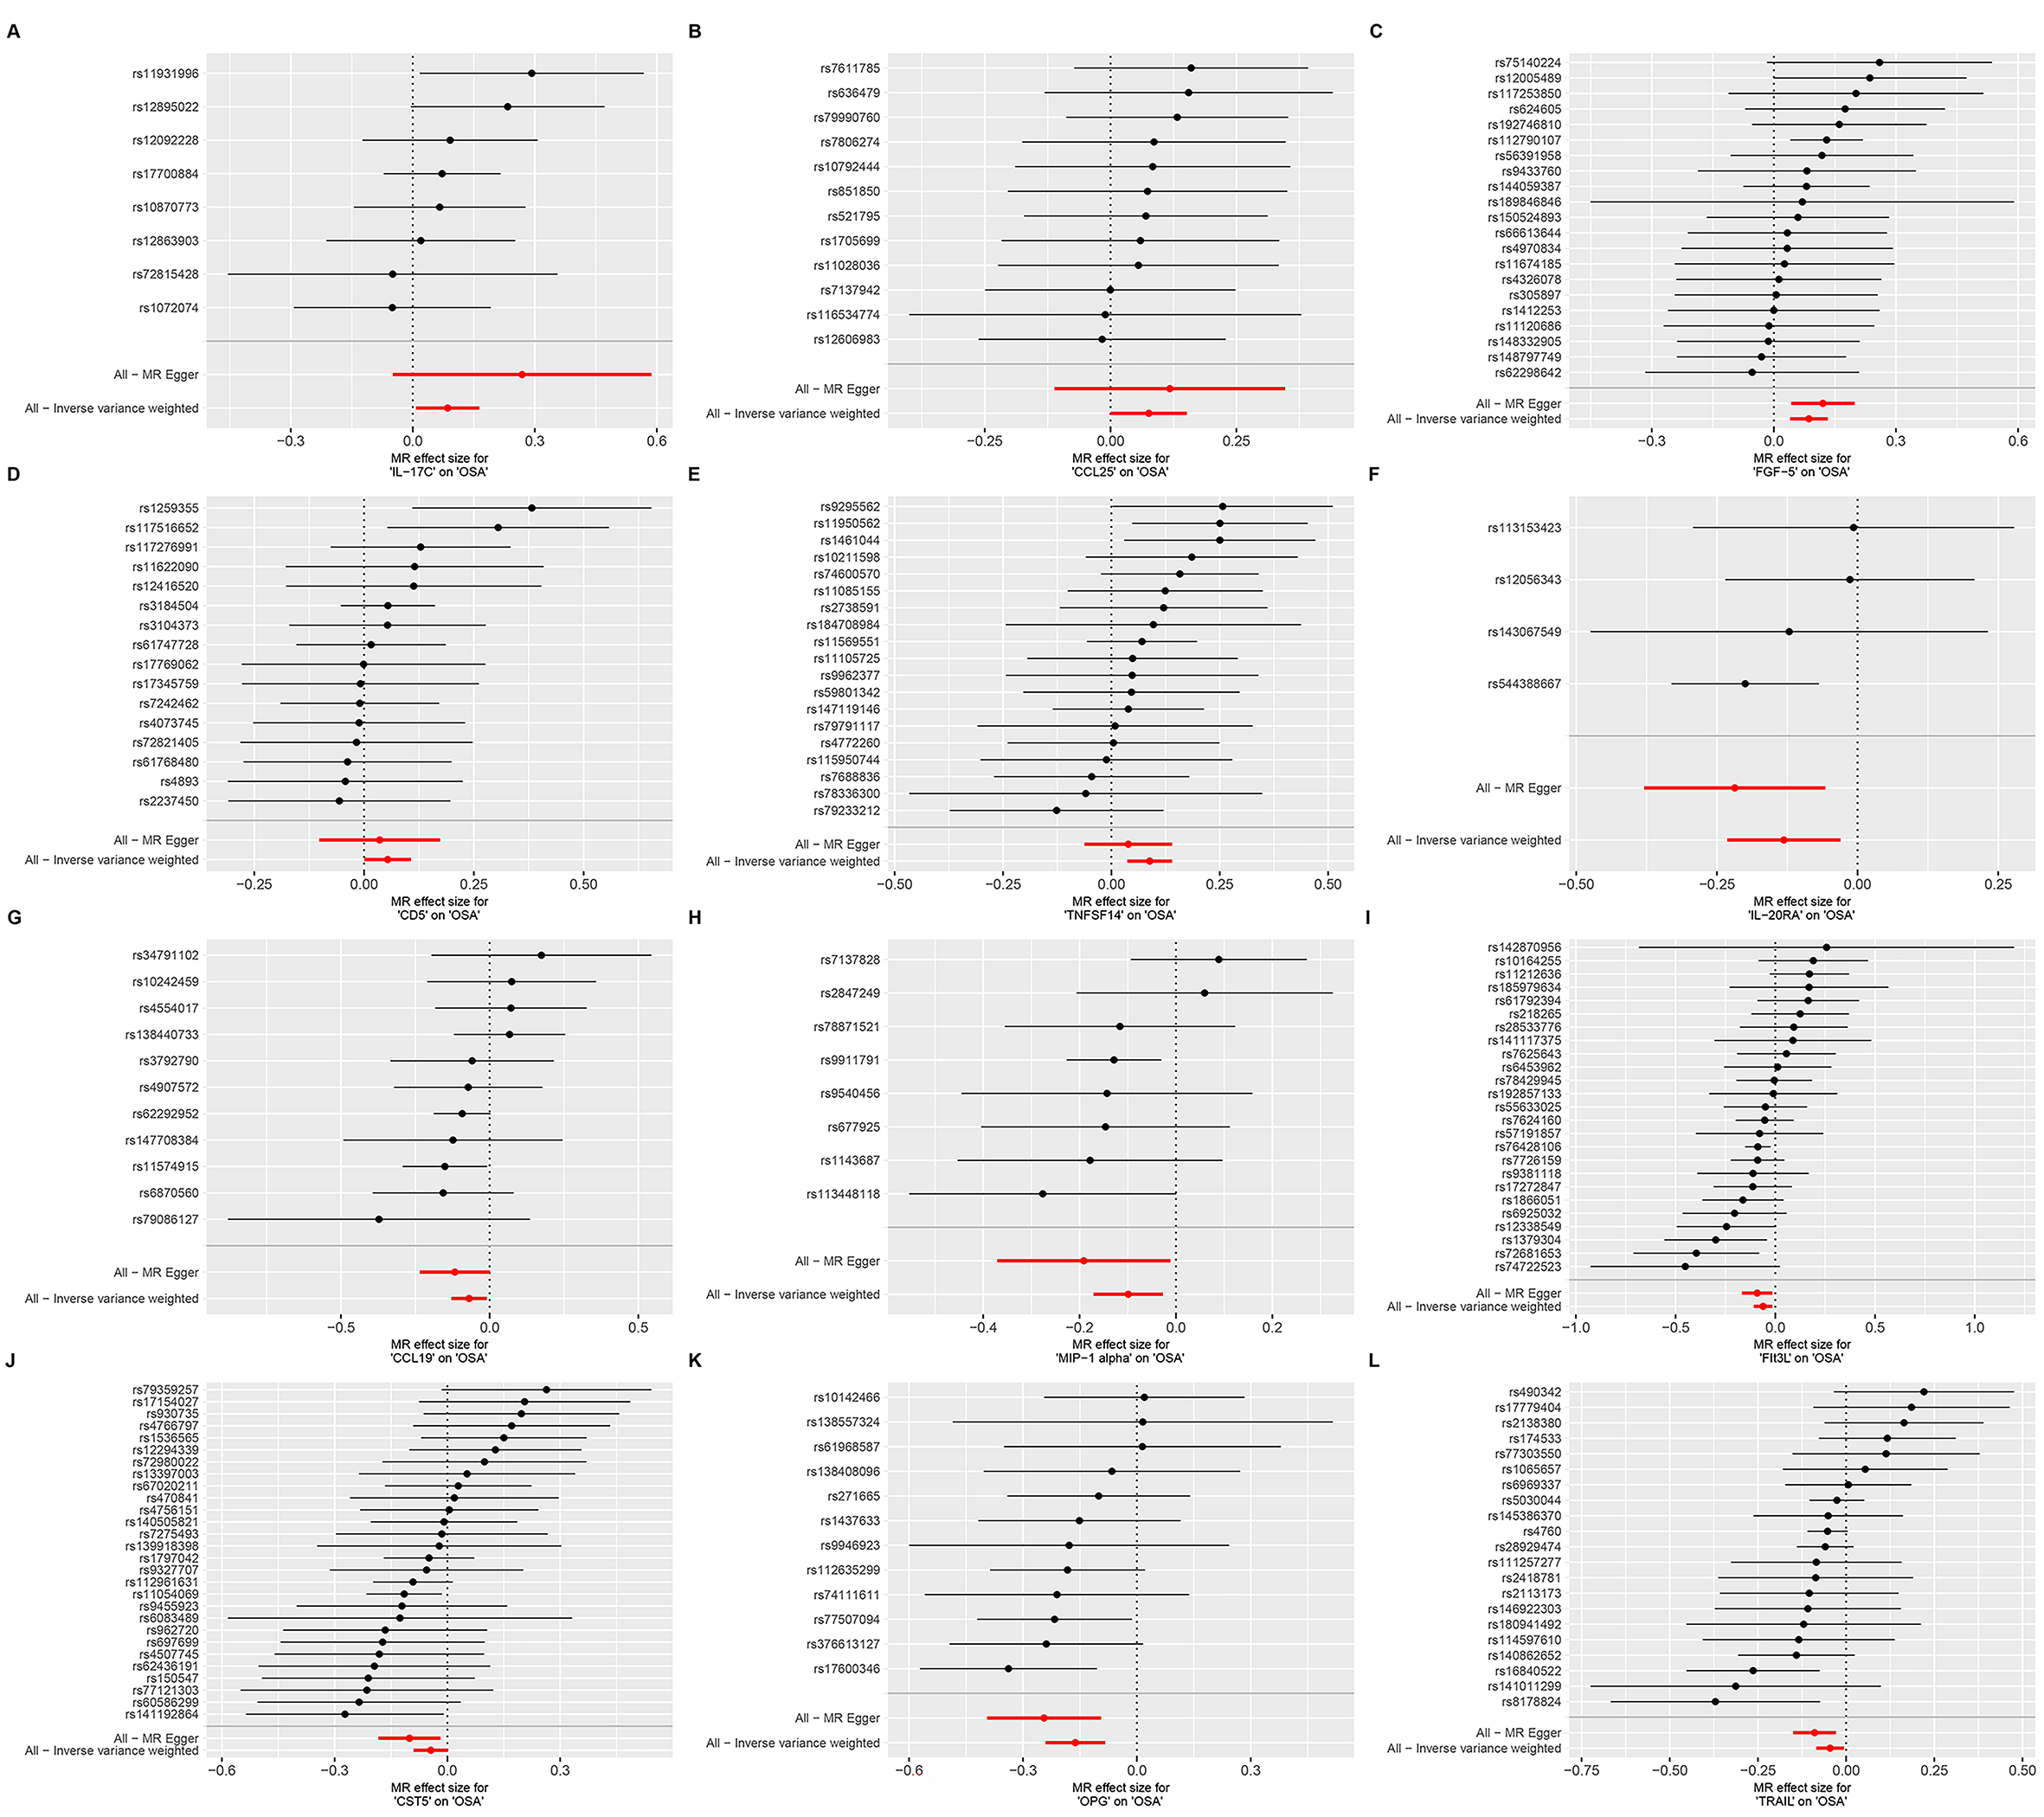


**Abbreviations:** **(A)** IL-17C, interleukin-17C; **(B)** CCL25, C-C motif chemokine 25; **(C)** FGF-5, fibroblast growth factor 5; **(D)** CD5, T-cell surface glycoprotein CD5; **(E)** TNFSF14, tumor necrosis factor ligand superfamily member 14; **(F)** IL-20RA, interleukin-20 receptor subunit alpha; **(G)** CCL19, C-C motif chemokine 19; **(H)** MIP-1 alpha, macrophage inflammatory protein-1 alpha; **(I)** Flt3L, Fms-related tyrosine kinase 3 ligand; **(J)** CST5, cystatin D; **(K)** OPG, osteoprotegerin; **(L)** TRAIL, TNF-related apoptosis ligand.

**Supplementary Figure 3** Funnel plots of MR analyses between 12 CIPs and OSA.


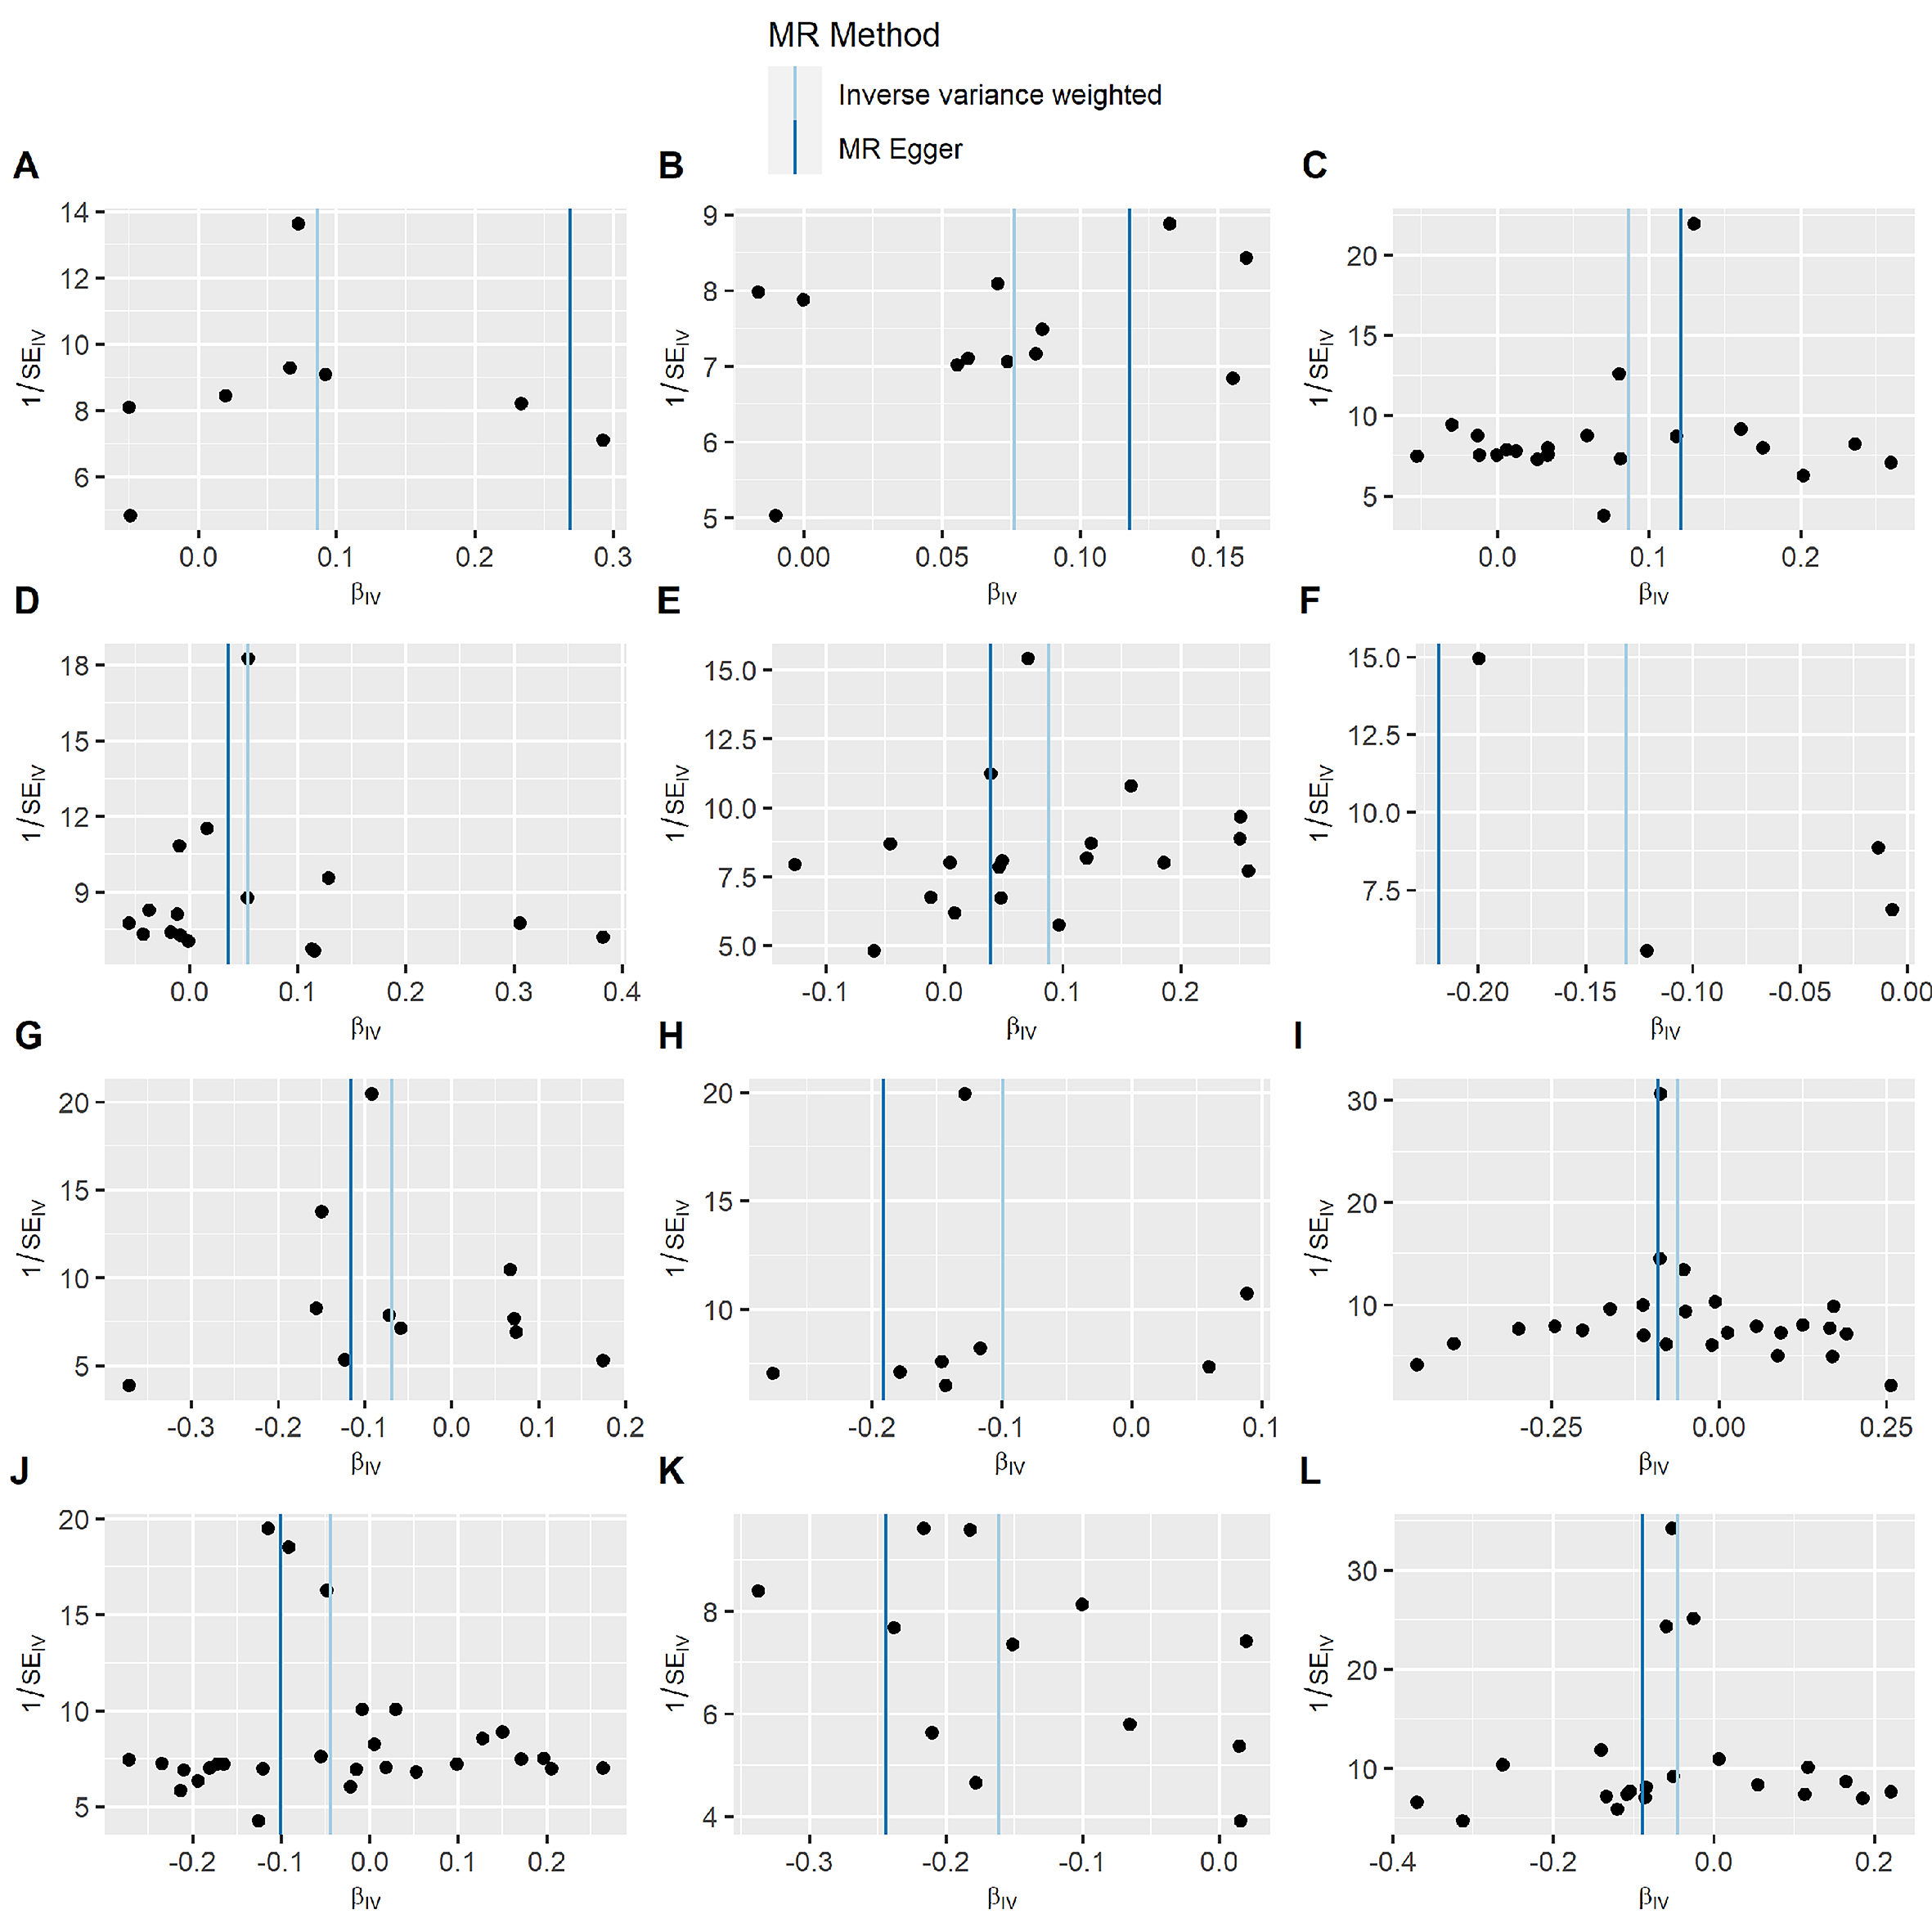


**Abbreviations:** **(A)** IL-17C, interleukin-17C; **(B)** CCL25, C-C motif chemokine 25; **(C)** FGF-5, fibroblast growth factor 5; **(D)** CD5, T-cell surface glycoprotein CD5; **(E)** TNFSF14, tumor necrosis factor ligand superfamily member 14; **(F)** IL-20RA, interleukin-20 receptor subunit alpha; **(G)** CCL19, C-C motif chemokine 19; **(H)** MIP-1 alpha, macrophage inflammatory protein-1 alpha; **(I)** Flt3L, Fms-related tyrosine kinase 3 ligand; **(J)** CST5, cystatin D; **(K)** OPG, osteoprotegerin; **(L)** TRAIL, TNF-related apoptosis ligand.

**Supplementary Figure 4** Leave-one-out sensitivity analyses of MR analyses between 12 CIPs and OSA.


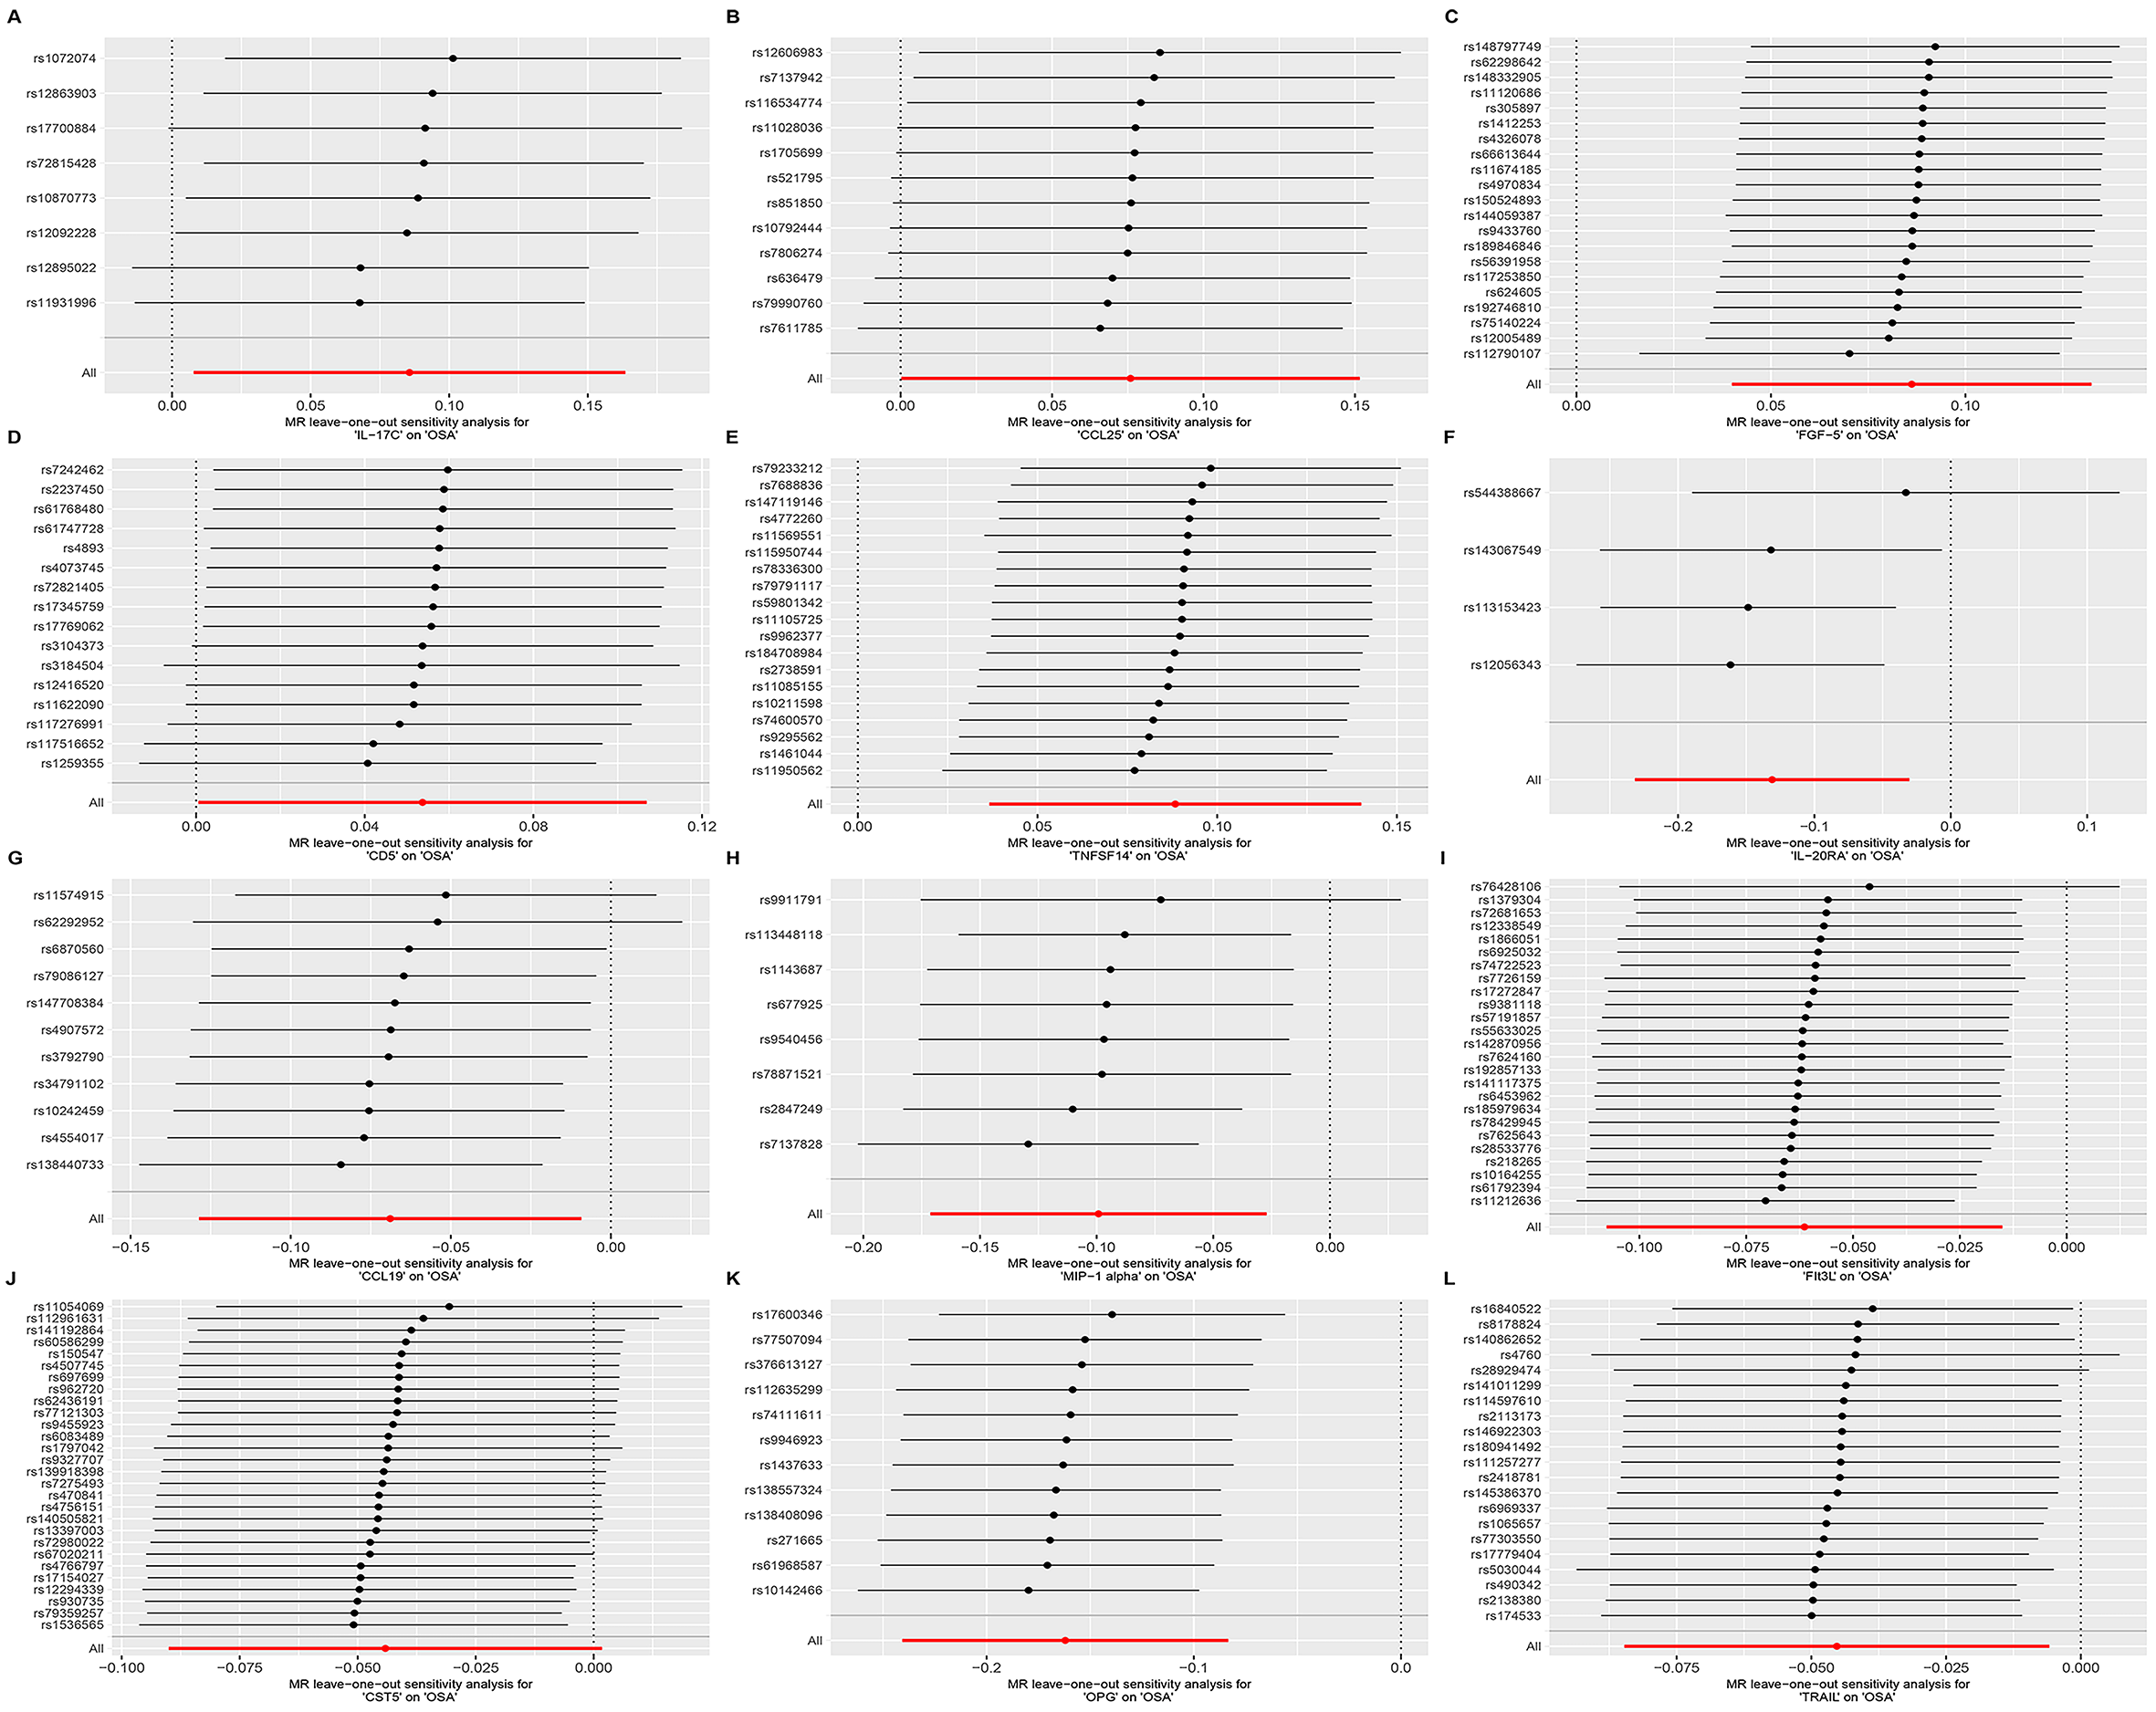


**Abbreviations:** **(A)** IL-17C, interleukin-17C; **(B)** CCL25, C-C motif chemokine 25; **(C)** FGF-5, fibroblast growth factor 5; **(D)** CD5, T-cell surface glycoprotein CD5; **(E)** TNFSF14, tumor necrosis factor ligand superfamily member 14; **(F)** IL-20RA, interleukin-20 receptor subunit alpha; **(G)** CCL19, C-C motif chemokine 19; **(H)** MIP-1 alpha, macrophage inflammatory protein-1 alpha; **(I)** Flt3L, Fms-related tyrosine kinase 3 ligand; **(J)** CST5, cystatin D; **(K)** OPG, osteoprotegerin; **(L)** TRAIL, TNF-related apoptosis ligand.

**Supplementary Figure 5** The negative outcomes of the reverse MR analysis obtained through the IVW method with OSA as exposures and CIPs as outcomes.


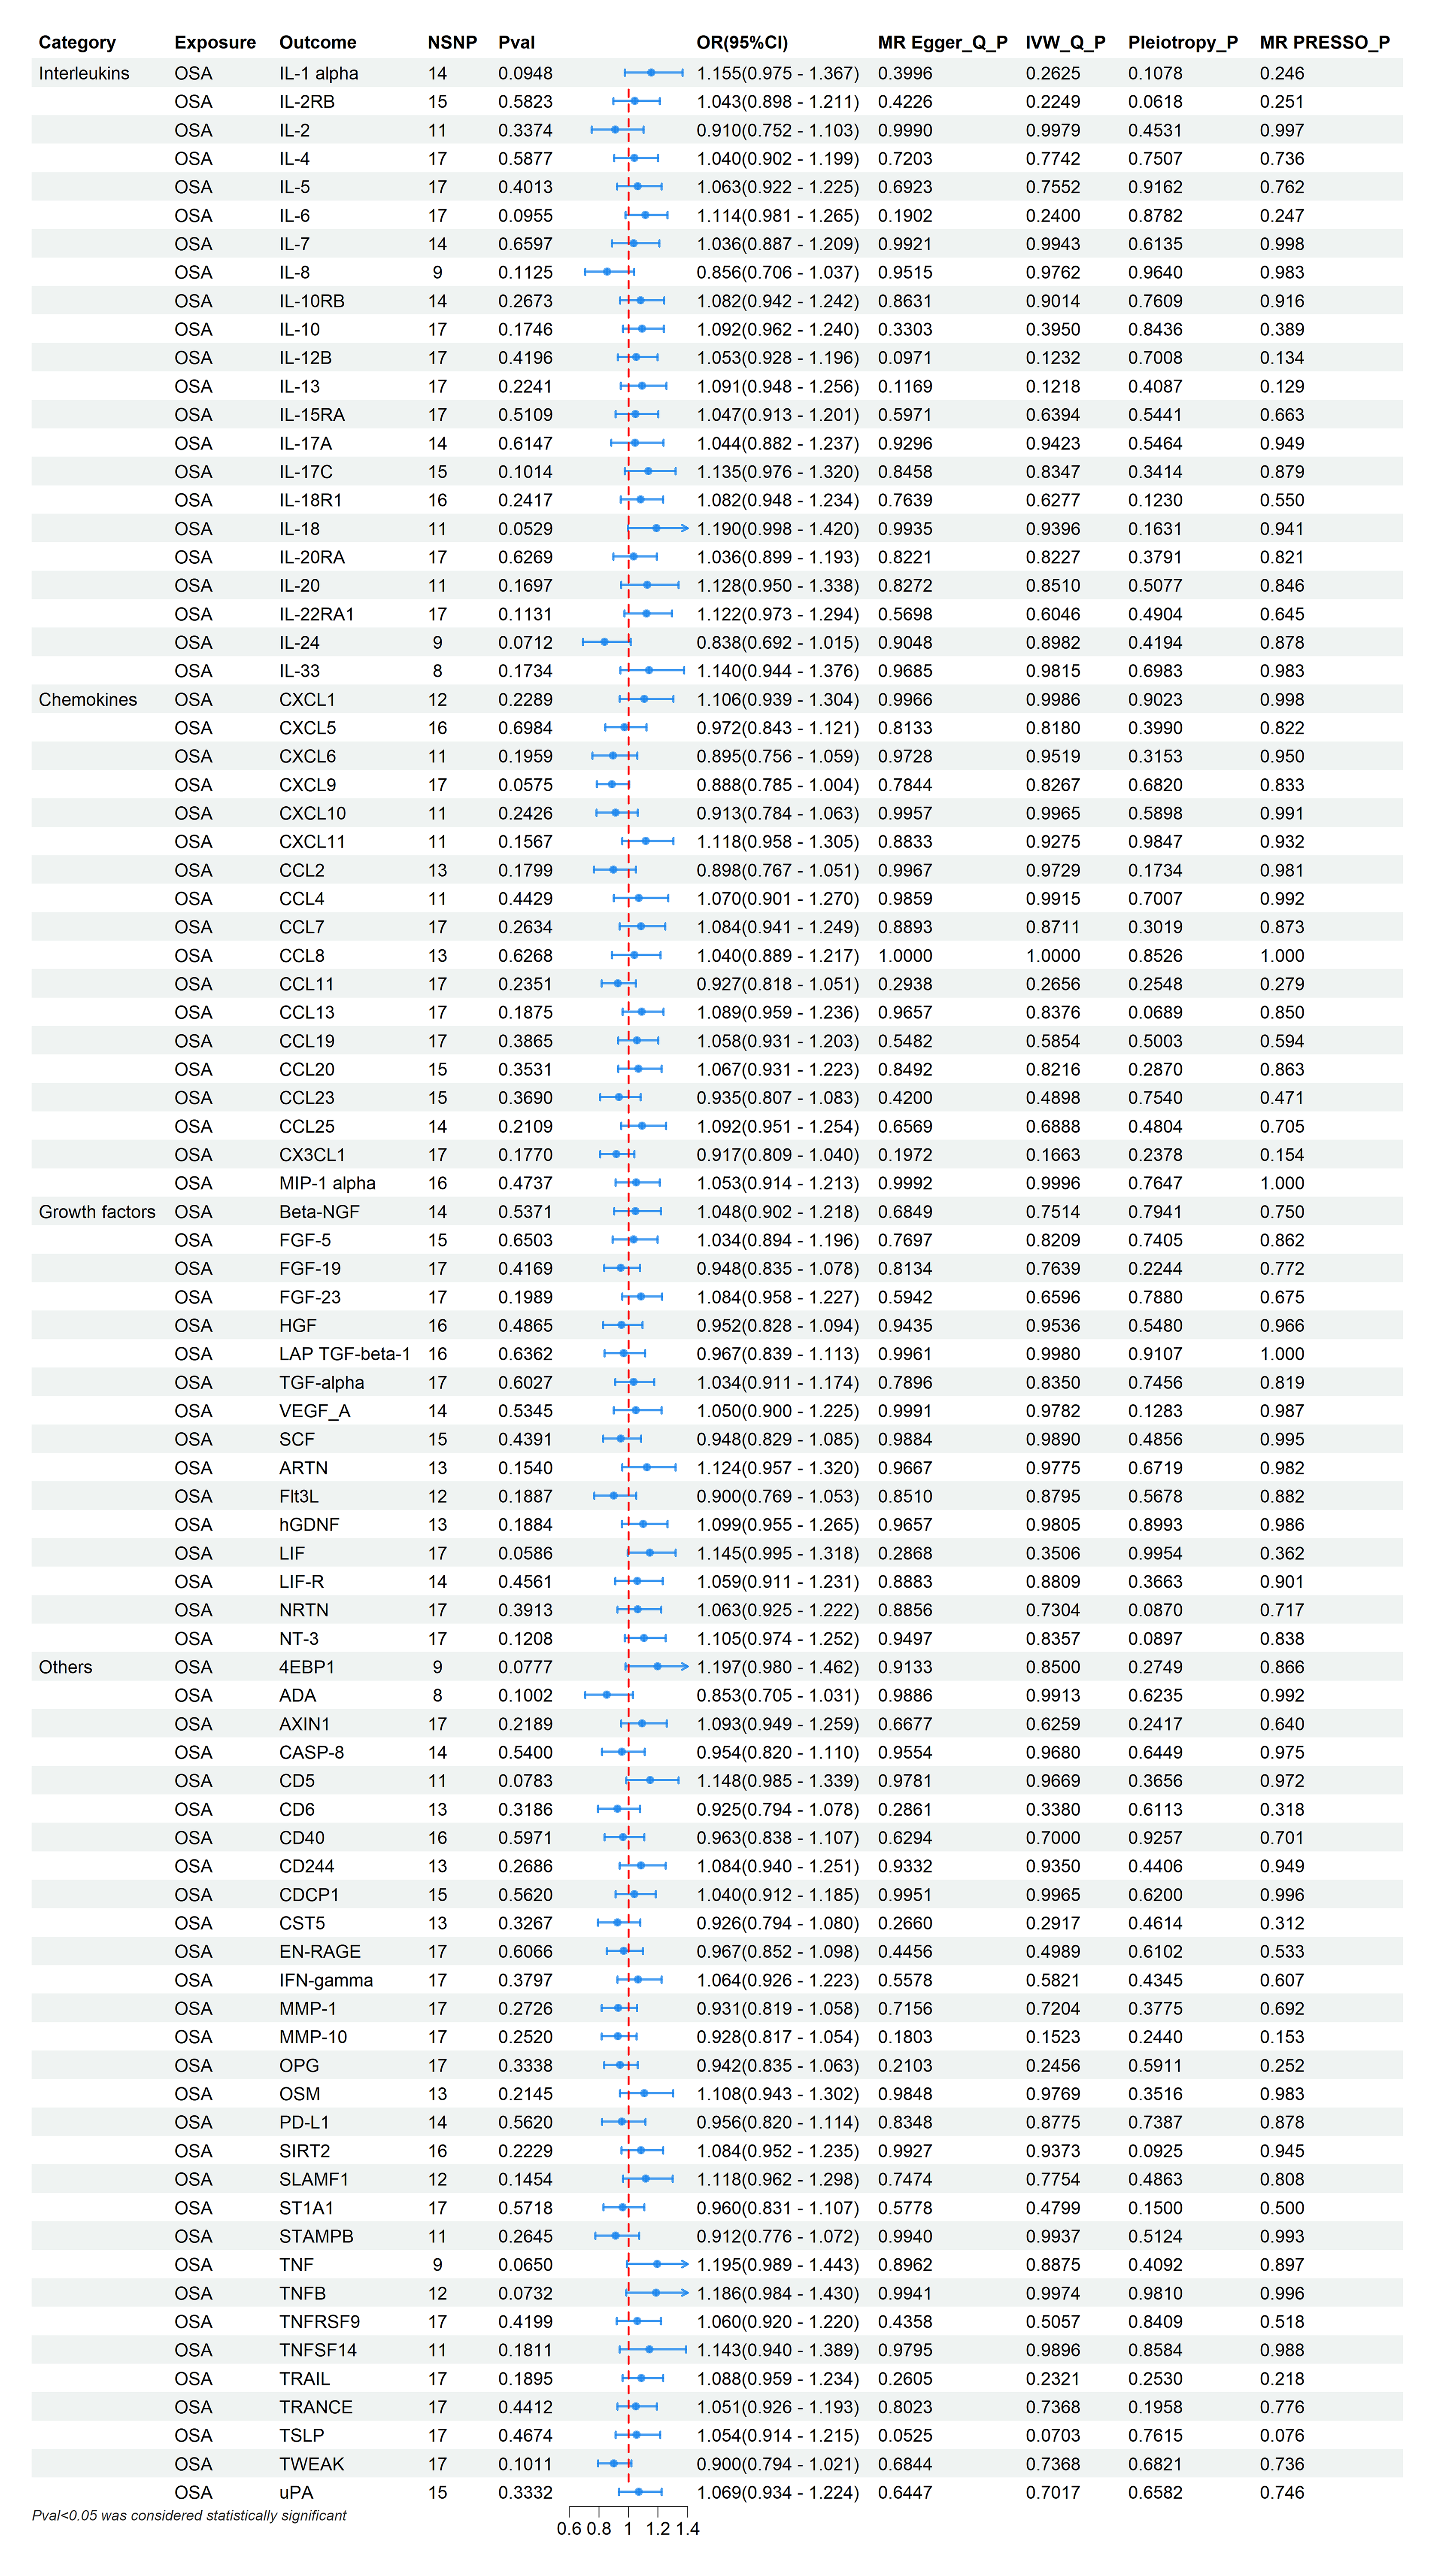


**Notes:** NSNP, the number of SNPs used in the analysis; MR Egger_Q_P, The P-value from the Cochran Q test computed using the MR Egger method; IVW_Q_P, The P-value from the Cochran Q test computed using the IVW method; Pleiotropy_P, the P-value of the MR-Egger regression intercept hypothesis test; MR PRESSO_P, the P-value of the horizontal pleiotropy test in MR-PRESSO.

**Supplementary Figure 6** Forest plots of MR analyses between OSA and 5 CIPs.


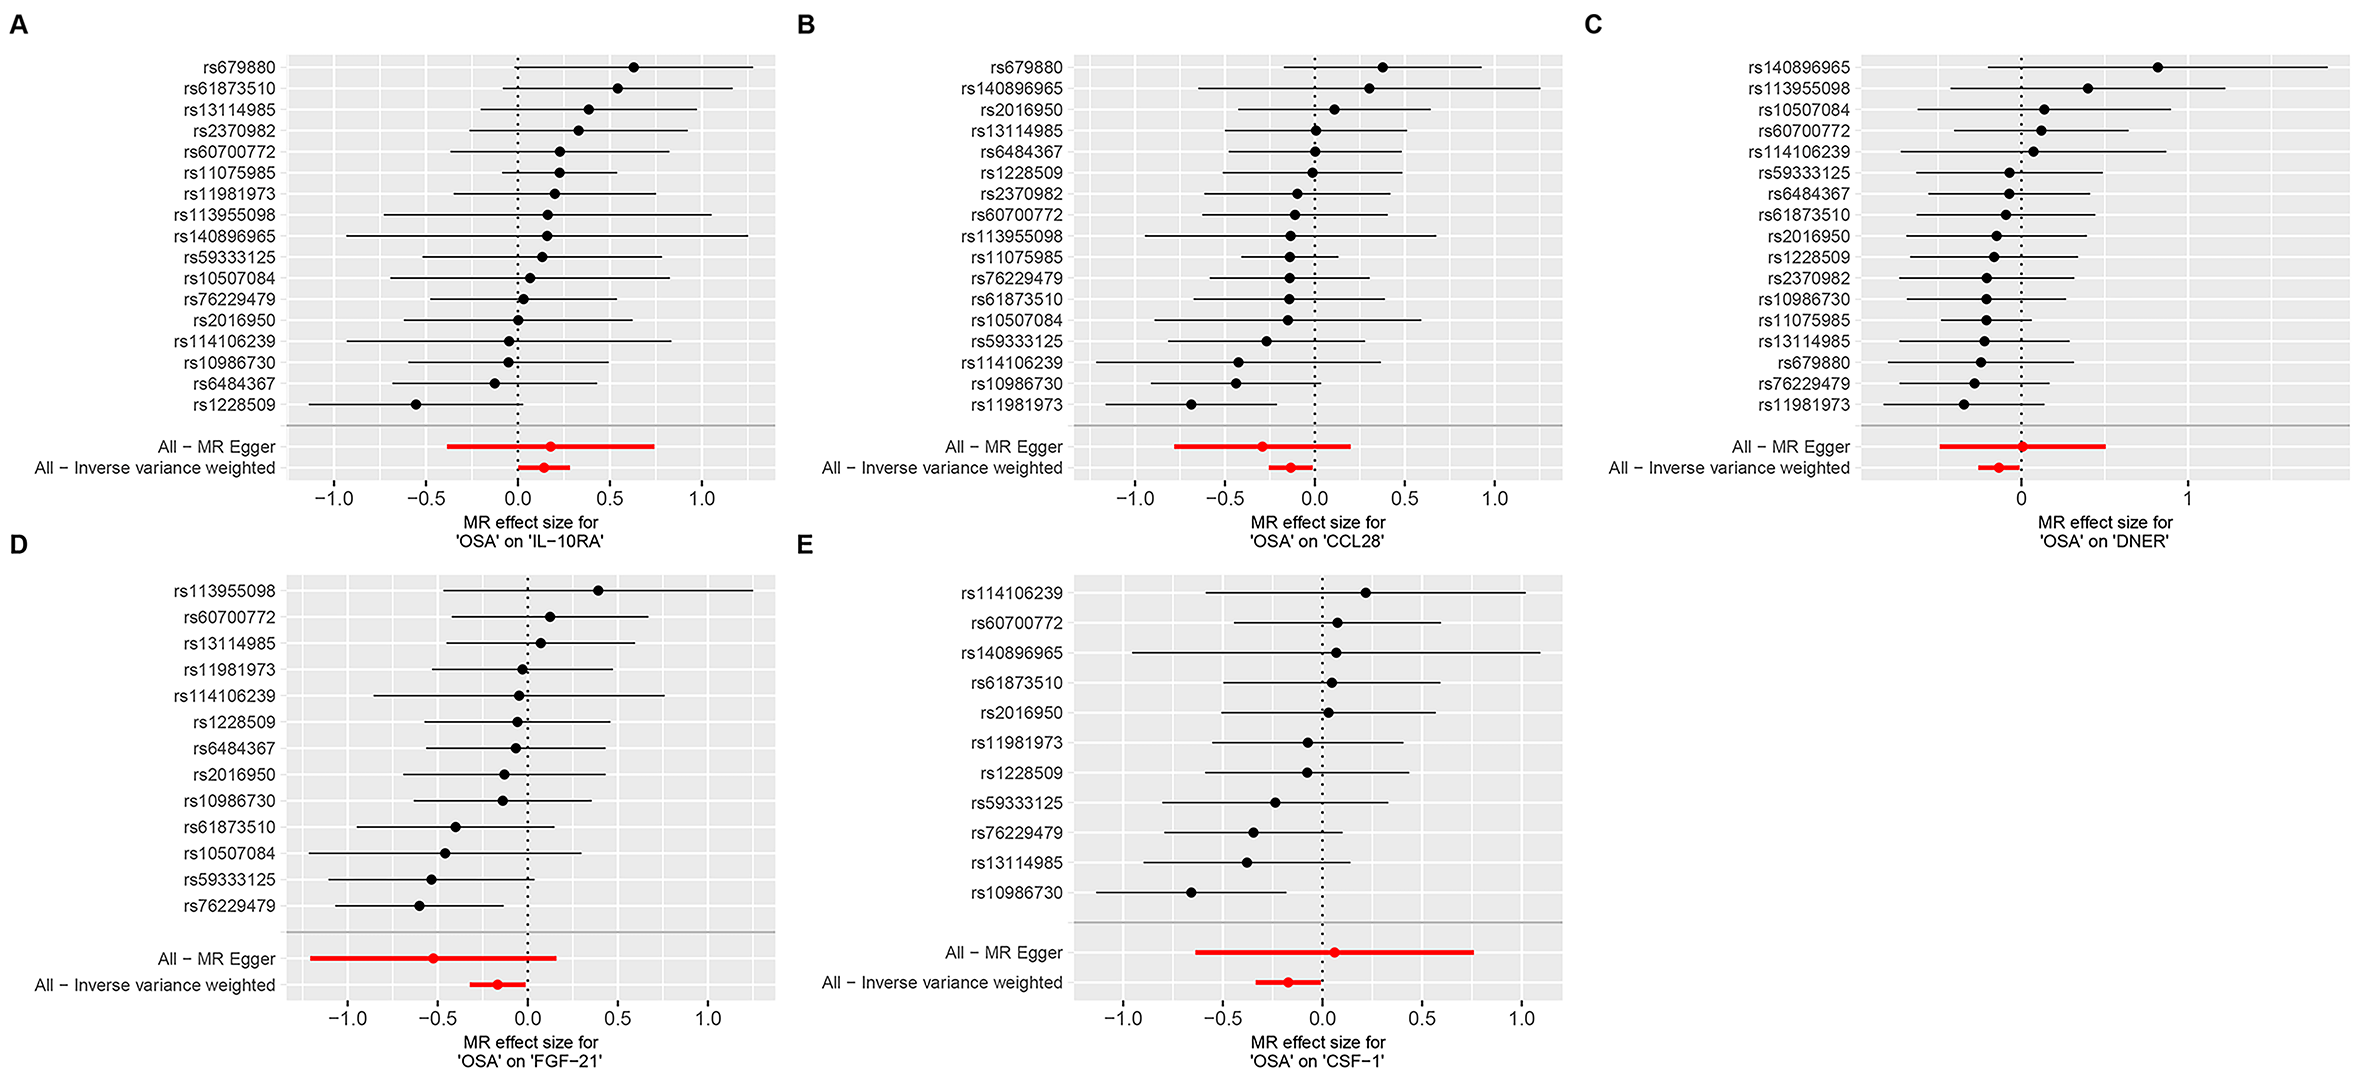


**Abbreviations:** **(A)** IL-10RA, interleukin-10 receptor subunit alpha; **(B)** CCL28, C-C motif chemokine 28; **(C)** DNER, delta and notch-like epidermal growth factor-related receptor; **(D)** FGF-21, fibroblast growth factor 21; **(E)** CSF-1, macrophage colony-stimulating factor 1.

**Supplementary Figure 7** Funnel plots of MR analyses between OSA and 5 CIPs.


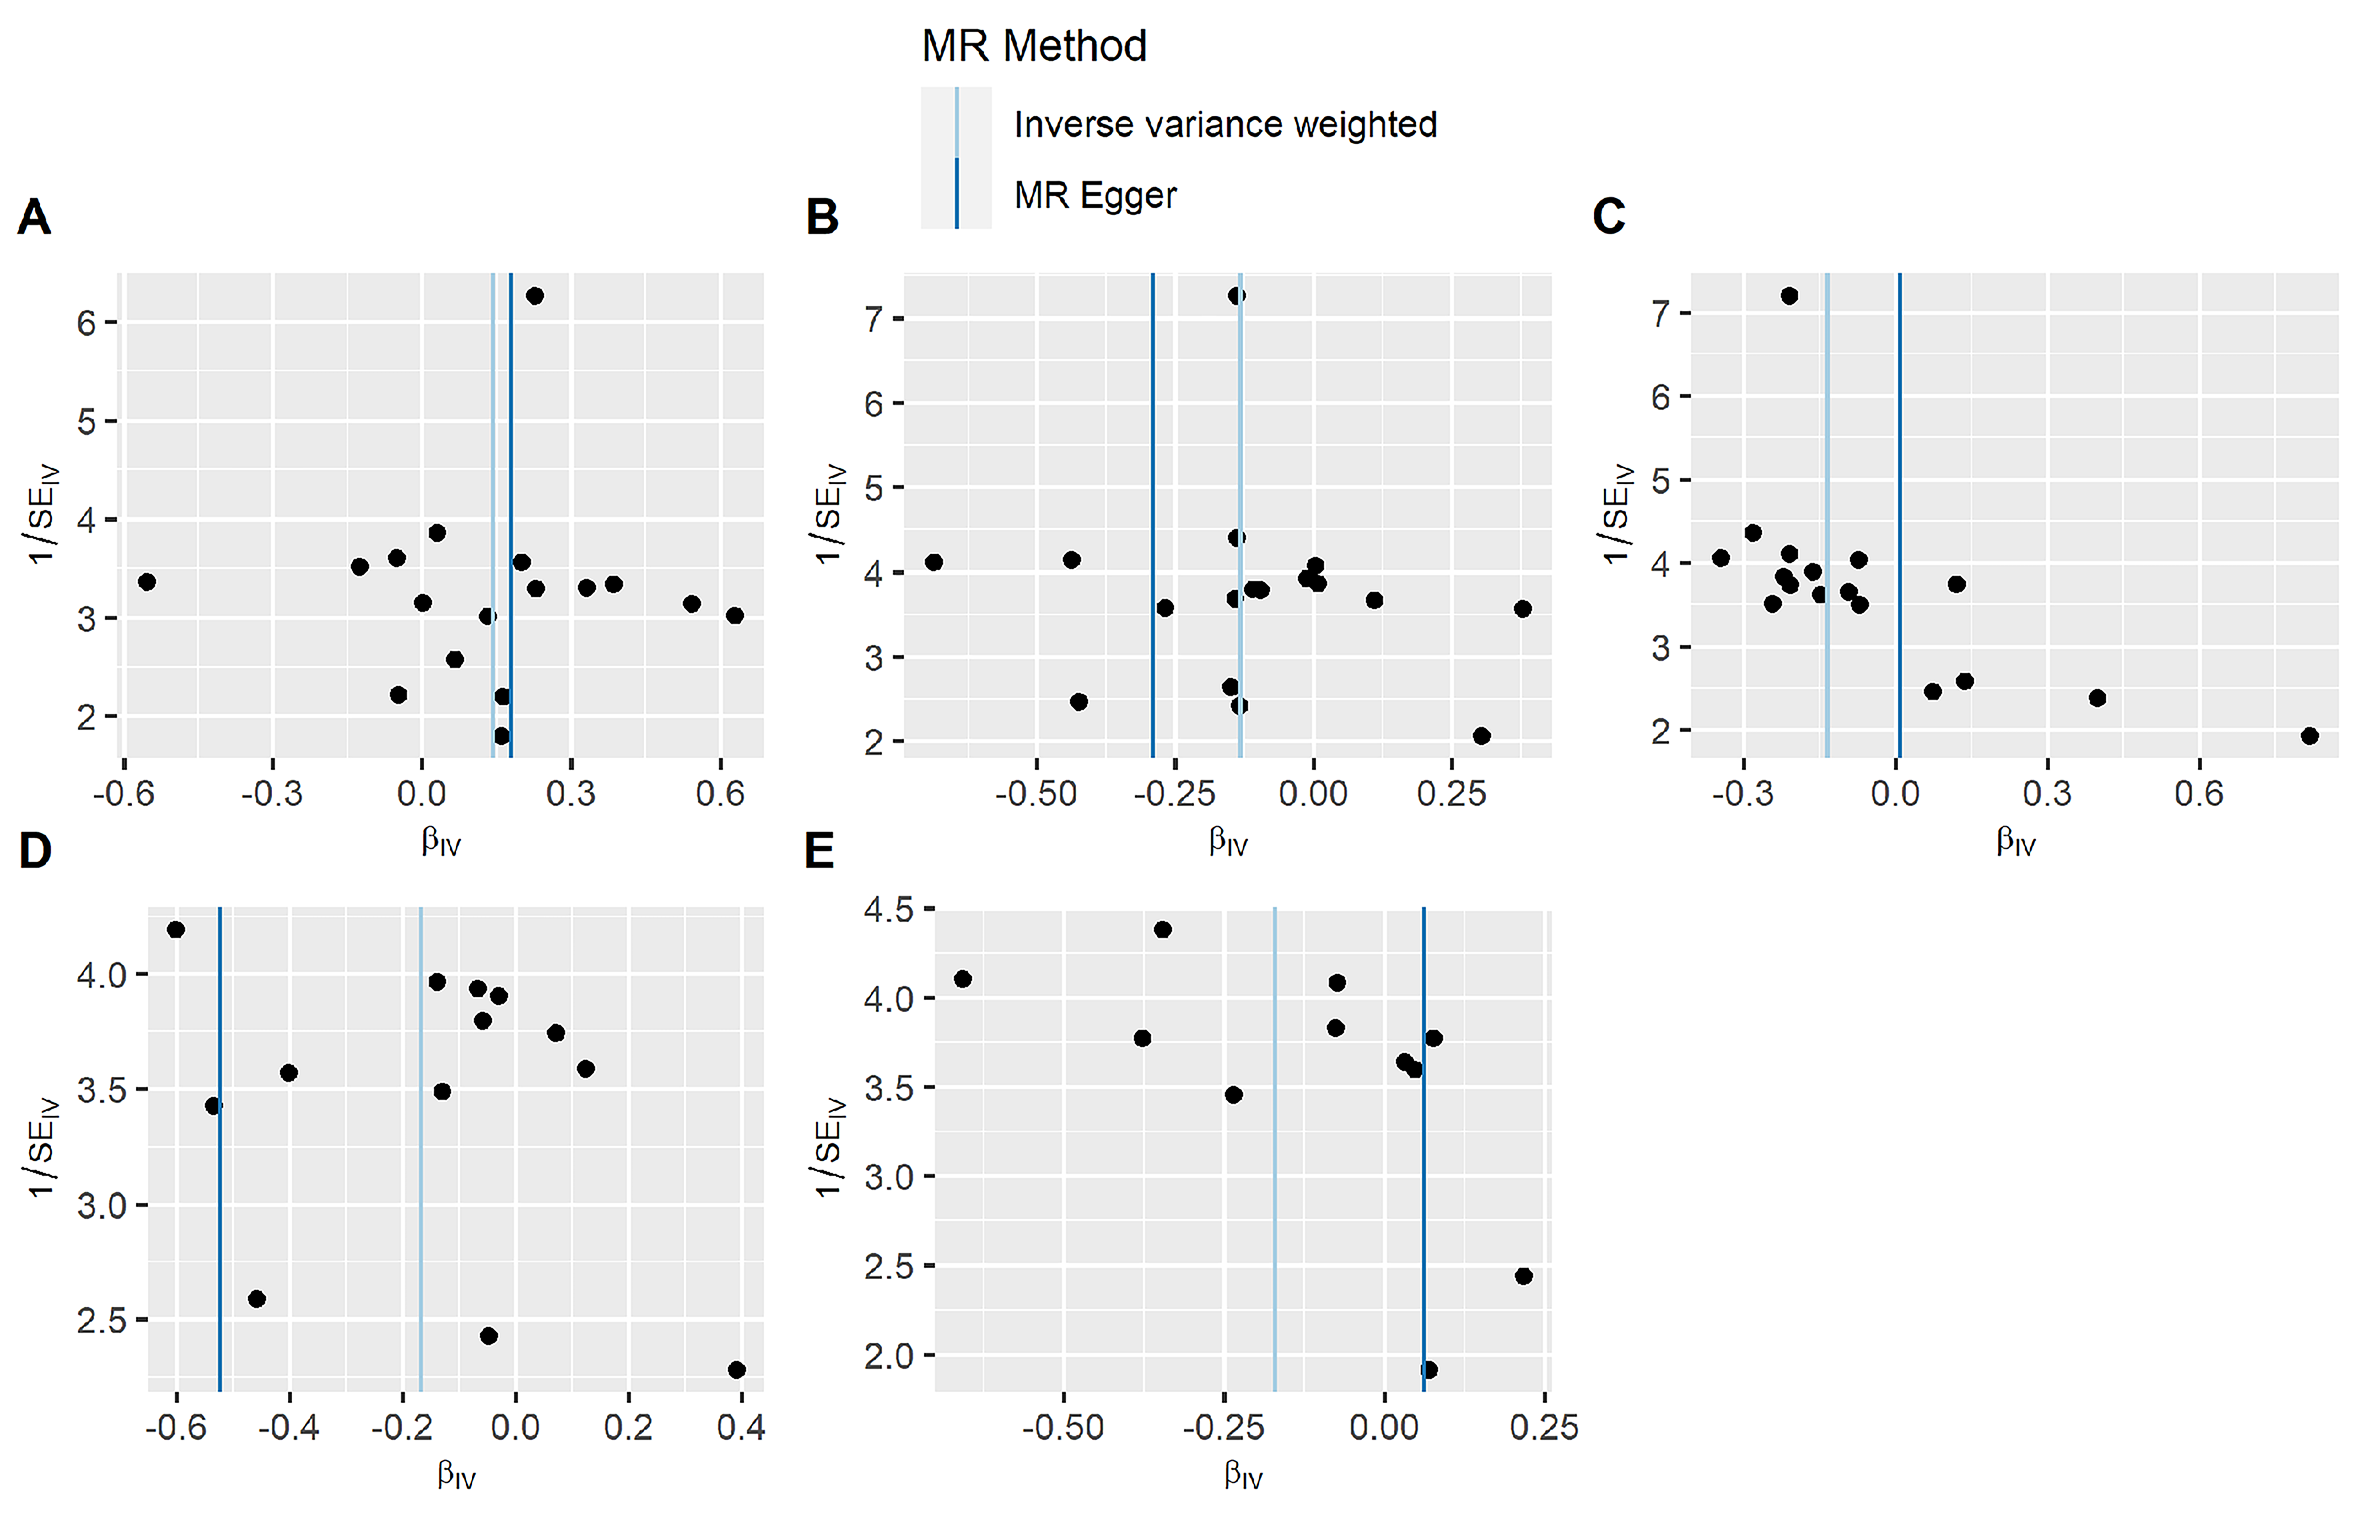


**Abbreviations:** **(A)** IL-10RA, interleukin-10 receptor subunit alpha; **(B)** CCL28, C-C motif chemokine 28; **(C)** DNER, delta and notch-like epidermal growth factor-related receptor; **(D)** FGF-21, fibroblast growth factor 21; **(E)** CSF-1, macrophage colony-stimulating factor 1.

**Supplementary Figure 8** Leave-one-out sensitivity analyses of MR analyses between OSA and 5 CIPs.


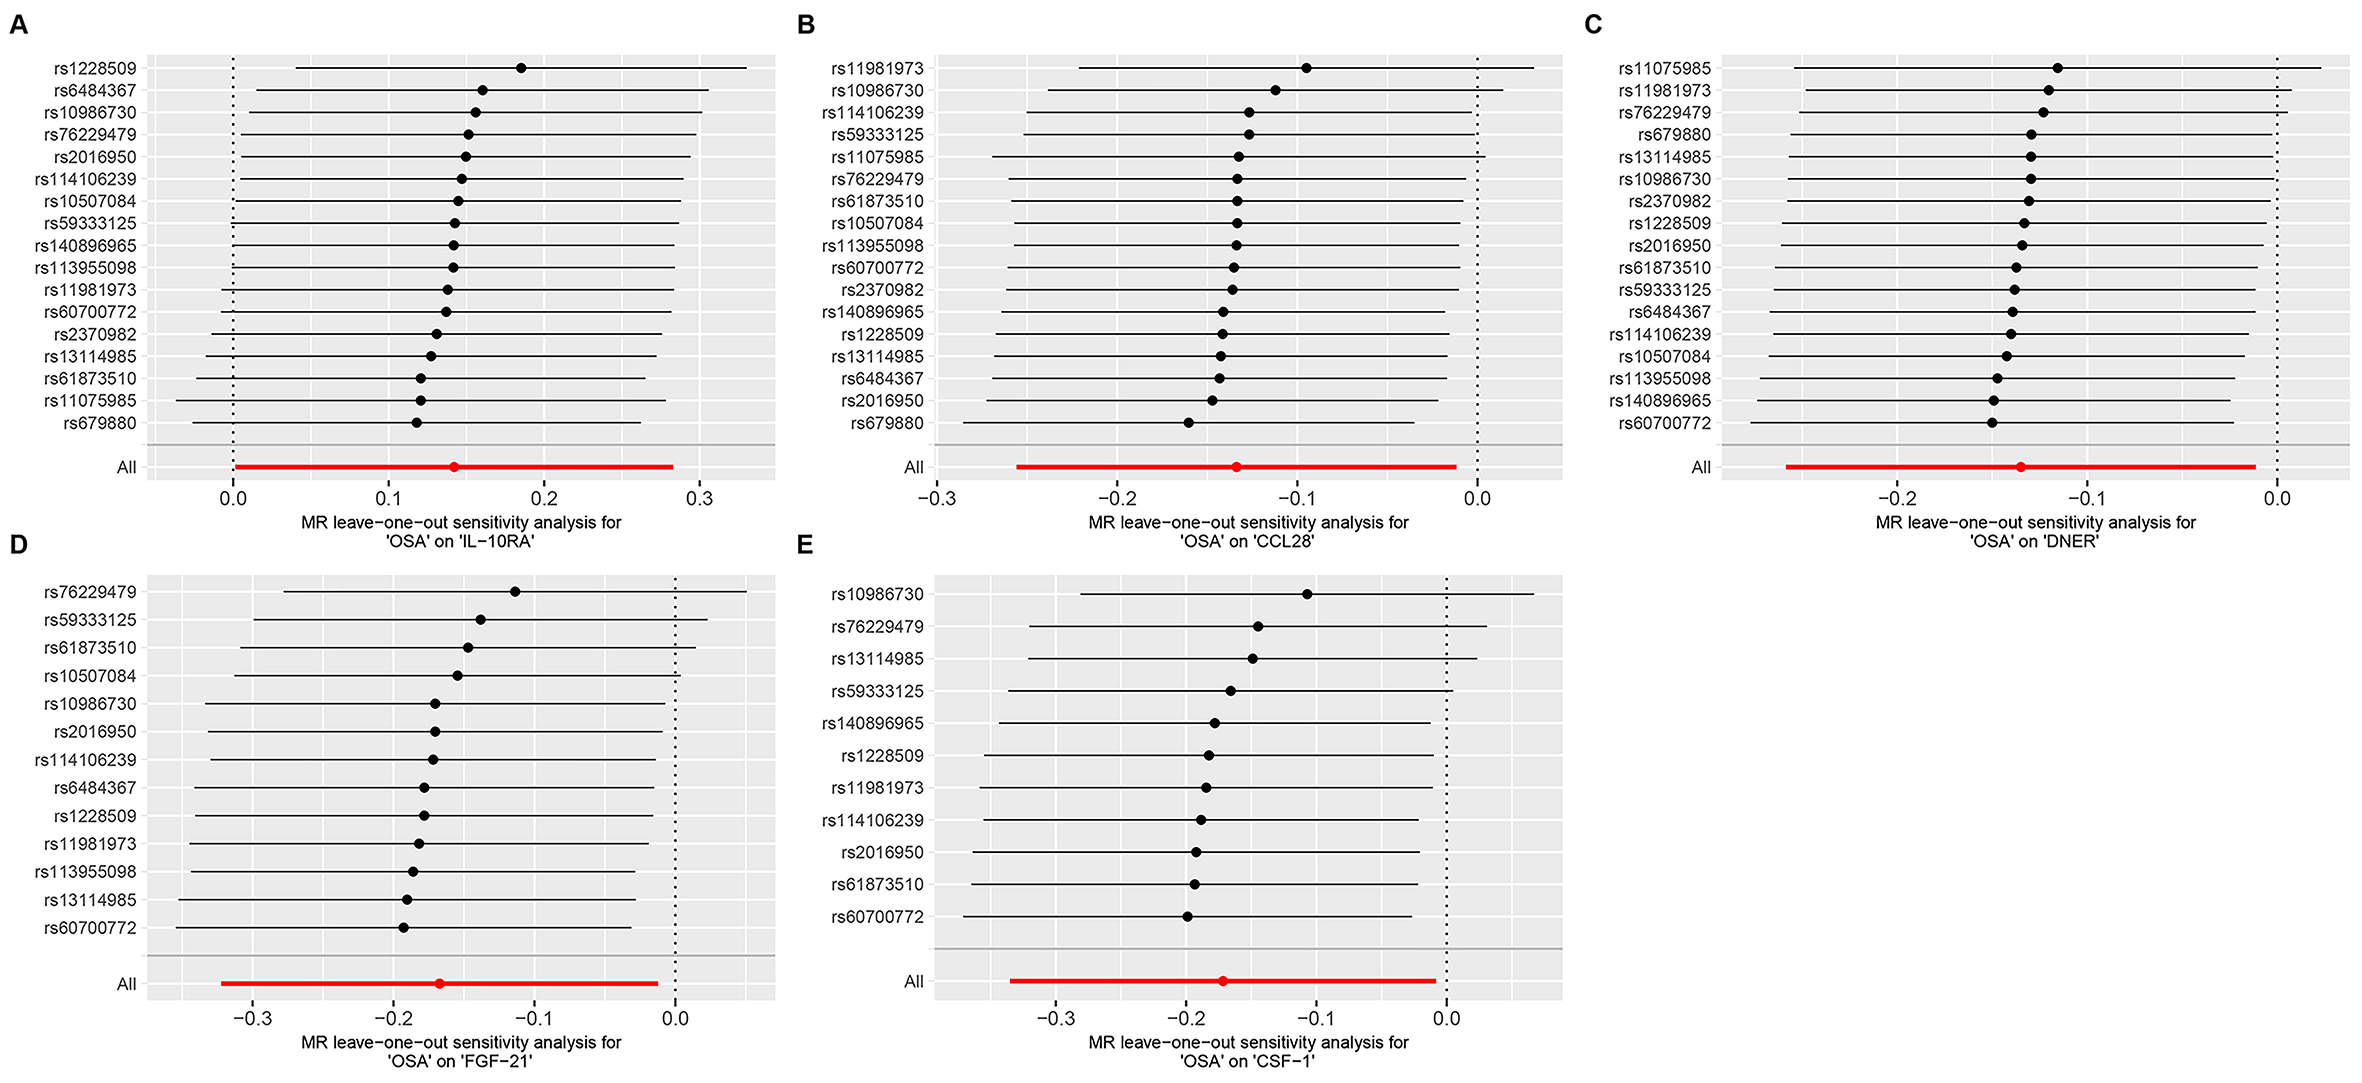


**Abbreviations:** **(A)** IL-10RA, interleukin-10 receptor subunit alpha; **(B)** CCL28, C-C motif chemokine 28; **(C)** DNER, delta and notch-like epidermal growth factor-related receptor; **(D)** FGF-21, fibroblast growth factor 21; **(E)** CSF-1, macrophage colony-stimulating factor 1.

**Supplementary Table 1** Details of CIPs predicting SNPs with OSA (with SNPs reaching P-value < 5x10⁻⁶).

|  | **CIPs** | | | | |  | **OSA** | | **R2** |  |
| --- | --- | --- | --- | --- | --- | --- | --- | --- | --- | --- |
| **SNP** | **effect allele** | **other allele** | **beta** | **se** | **Pval** |  | **log(OR)** | **se** | **F** |
| **IL-1 alpha** |  |  |  |  |  |  |  |  |  |  |
| rs10233998 | T | G | 0.1310 | 0.0286 | 4.64E-06 |  | 0.2771 | 0.0195 | 0.0018 | 20.98 |
| rs115494443 | A | G | 0.2658 | 0.0565 | 2.55E-06 |  | 0.2335 | 0.0393 | 0.0020 | 22.13 |
| rs115602471 | T | C | 0.2215 | 0.0469 | 2.33E-06 |  | 0.3892 | 0.0635 | 0.0020 | 22.30 |
| rs117537822 | T | C | 0.2176 | 0.0439 | 7.17E-07 |  | 0.0269 | 0.0210 | 0.0021 | 24.56 |
| rs11878153 | A | G | 0.1116 | 0.0221 | 4.42E-07 |  | -0.0874 | 0.0109 | 0.0022 | 25.50 |
| rs12047801 | T | C | 0.0783 | 0.0171 | 4.67E-06 |  | 0.0909 | 0.0120 | 0.0018 | 20.96 |
| rs4767214 | T | C | 0.0620 | 0.0130 | 1.85E-06 |  | 0.0226 | 0.0077 | 0.0019 | 22.74 |
| rs523604 | A | G | 0.0754 | 0.0142 | 1.10E-07 |  | 0.0530 | 0.0078 | 0.0027 | 28.19 |
| **IL-2RB** |  |  |  |  |  |  |  |  |  |  |
| rs11630708 | T | C | -0.2102 | 0.0443 | 2.09E-06 |  | -0.0943 | 0.0221 | 0.0019 | 22.51 |
| rs117538197 | T | C | 0.1213 | 0.0261 | 3.36E-06 |  | 0.0099 | 0.0175 | 0.0018 | 21.60 |
| rs17549820 | T | C | 0.0631 | 0.0129 | 1.00E-06 |  | -0.0662 | 0.0078 | 0.0020 | 23.92 |
| rs2157876 | T | G | -0.1133 | 0.0239 | 2.13E-06 |  | -0.1629 | 0.0129 | 0.0020 | 22.47 |
| rs34246740 | T | C | -0.0721 | 0.0156 | 3.80E-06 |  | -0.0472 | 0.0099 | 0.0019 | 21.36 |
| rs9321271 | A | C | -0.1570 | 0.0325 | 1.36E-06 |  | -0.0750 | 0.0340 | 0.0020 | 23.33 |
| **IL-2** |  |  |  |  |  |  |  |  |  |  |
| rs28515912 | A | C | -0.0723 | 0.0149 | 1.22E-06 |  | 0.1373 | 0.0080 | 0.0022 | 23.54 |
| rs36006983 | T | C | -0.0728 | 0.0153 | 1.95E-06 |  | 0.0662 | 0.0100 | 0.0020 | 22.64 |
| rs74852566 | T | G | -0.1999 | 0.0431 | 3.52E-06 |  | 0.0869 | 0.0280 | 0.0018 | 21.51 |
| rs77853517 | T | C | -0.1048 | 0.0217 | 1.37E-06 |  | 0.0689 | 0.0099 | 0.0020 | 23.32 |
| rs79419497 | A | G | 0.2016 | 0.0424 | 1.99E-06 |  | 0.0910 | 0.0295 | 0.0019 | 22.60 |
| **IL-4** |  |  |  |  |  |  |  |  |  |  |
| rs11989681 | A | G | 0.0678 | 0.0136 | 6.19E-07 |  | 0.2797 | 0.0081 | 0.0022 | 24.85 |
| rs13130198 | A | G | -0.0773 | 0.0159 | 1.16E-06 |  | 0.0662 | 0.0090 | 0.0021 | 23.63 |
| rs13418255 | A | G | 0.0701 | 0.0153 | 4.61E-06 |  | 0.0240 | 0.0080 | 0.0018 | 20.99 |
| rs1490743 | T | G | -0.1338 | 0.0278 | 1.49E-06 |  | 0.0596 | 0.0168 | 0.0022 | 23.16 |
| rs2502347 | T | C | -0.0770 | 0.0167 | 4.01E-06 |  | 0.1376 | 0.0089 | 0.0019 | 21.26 |
| rs4876407 | T | G | -0.1391 | 0.0299 | 3.28E-06 |  | -0.0176 | 0.0161 | 0.0018 | 21.64 |
| rs75610895 | T | C | -0.2354 | 0.0450 | 1.68E-07 |  | -0.2357 | 0.0411 | 0.0023 | 27.36 |
| **IL-5** |  |  |  |  |  |  |  |  |  |  |
| rs10988407 | A | G | 0.0777 | 0.0167 | 3.28E-06 |  | -0.1064 | 0.0112 | 0.0018 | 21.64 |
| rs12592185 | T | C | 0.0838 | 0.0173 | 1.27E-06 |  | -0.1042 | 0.0100 | 0.0021 | 23.46 |
| rs17009223 | A | G | -0.1169 | 0.0236 | 7.29E-07 |  | -0.0915 | 0.0152 | 0.0021 | 24.53 |
| rs34639000 | A | G | 0.0765 | 0.0147 | 1.95E-07 |  | -0.0673 | 0.0080 | 0.0023 | 27.08 |
| rs4277106 | A | G | -0.2747 | 0.0592 | 3.48E-06 |  | -0.2109 | 0.0343 | 0.0018 | 21.53 |
| rs62069649 | A | G | 0.2206 | 0.0482 | 4.72E-06 |  | 0.0119 | 0.0529 | 0.0020 | 20.94 |
| rs7142197 | A | G | -0.0924 | 0.0188 | 8.88E-07 |  | 0.0477 | 0.0117 | 0.0020 | 24.15 |
| **IL-6** |  |  |  |  |  |  |  |  |  |  |
| rs10977774 | A | C | -0.3418 | 0.0701 | 1.08E-06 |  | 0.0468 | 0.0280 | 0.0019 | 23.77 |
| rs17486819 | T | G | 0.0975 | 0.0211 | 3.82E-06 |  | 0.0312 | 0.0107 | 0.0014 | 21.35 |
| rs187416244 | T | C | -0.2244 | 0.0469 | 1.71E-06 |  | 0.4770 | 0.0720 | 0.0016 | 22.89 |
| rs2228145 | A | C | -0.1684 | 0.0119 | 1.83E-45 |  | 0.0264 | 0.0084 | 0.0134 | 200.23 |
| **IL-7** |  |  |  |  |  |  |  |  |  |  |
| rs10403201 | A | G | -0.0584 | 0.0127 | 4.26E-06 |  | -0.0711 | 0.0089 | 0.0014 | 21.14 |
| rs1050152 | T | C | -0.0651 | 0.0133 | 9.84E-07 |  | 0.2345 | 0.0083 | 0.0020 | 23.95 |
| rs11742240 | T | G | -0.0647 | 0.0131 | 7.86E-07 |  | 0.1154 | 0.0082 | 0.0017 | 24.39 |
| rs12699881 | A | G | 0.0680 | 0.0138 | 8.33E-07 |  | 0.0388 | 0.0081 | 0.0017 | 24.28 |
| rs144728120 | T | C | 0.1495 | 0.0316 | 2.23E-06 |  | 0.0170 | 0.0170 | 0.0015 | 22.38 |
| rs7026771 | A | G | 0.0691 | 0.0148 | 3.03E-06 |  | 0.0948 | 0.0078 | 0.0018 | 21.80 |
| rs74131483 | A | G | 0.1372 | 0.0274 | 5.52E-07 |  | 0.0062 | 0.0176 | 0.0019 | 25.07 |
| rs77336315 | A | C | 0.2512 | 0.0531 | 2.24E-06 |  | 0.0129 | 0.0517 | 0.0016 | 22.38 |
| rs79072837 | T | C | -0.1360 | 0.0280 | 1.19E-06 |  | -0.0106 | 0.0207 | 0.0016 | 23.59 |
| **IL-8** |  |  |  |  |  |  |  |  |  |  |
| rs12075 | A | G | 0.0667 | 0.0116 | 8.92E-09 |  | -0.1246 | 0.0077 | 0.0022 | 33.06 |
| rs13064825 | T | C | 0.0560 | 0.0120 | 3.06E-06 |  | -0.1424 | 0.0078 | 0.0015 | 21.77 |
| rs141979722 | T | C | 0.2829 | 0.0608 | 3.27E-06 |  | -0.2348 | 0.0927 | 0.0019 | 21.65 |
| rs144815207 | T | C | 0.3186 | 0.0622 | 3.02E-07 |  | -0.0621 | 0.0458 | 0.0020 | 26.23 |
| rs145125644 | A | G | 0.2687 | 0.0555 | 1.29E-06 |  | -0.0829 | 0.0177 | 0.0016 | 23.44 |
| rs1516478 | T | C | 0.1479 | 0.0322 | 4.37E-06 |  | 0.1233 | 0.0321 | 0.0014 | 21.09 |
| rs34519991 | T | C | 0.0555 | 0.0120 | 3.75E-06 |  | 0.1097 | 0.0077 | 0.0015 | 21.39 |
| rs6446951 | A | G | -0.1894 | 0.0241 | 3.87E-15 |  | -0.0031 | 0.0192 | 0.0042 | 61.75 |
| rs6585420 | T | C | 0.1545 | 0.0325 | 2.00E-06 |  | -0.0345 | 0.0186 | 0.0015 | 22.60 |
| rs6709159 | A | G | 0.0562 | 0.0117 | 1.56E-06 |  | -0.1325 | 0.0077 | 0.0016 | 23.07 |
| rs7216538 | A | G | -0.1324 | 0.0279 | 2.08E-06 |  | -0.2510 | 0.0223 | 0.0016 | 22.52 |
| rs72633250 | A | C | 0.0574 | 0.0124 | 3.67E-06 |  | 0.1088 | 0.0079 | 0.0015 | 21.42 |
| rs72886502 | T | G | -0.3895 | 0.0760 | 2.98E-07 |  | -0.2052 | 0.0821 | 0.0021 | 26.26 |
| rs8069322 | A | G | 0.0668 | 0.0131 | 3.41E-07 |  | 0.1819 | 0.0086 | 0.0018 | 26.00 |
| rs906401 | T | C | 0.0941 | 0.0200 | 2.54E-06 |  | -0.0982 | 0.0140 | 0.0015 | 22.13 |
| rs972492 | A | C | -0.0936 | 0.0184 | 3.64E-07 |  | -0.3179 | 0.0132 | 0.0021 | 25.87 |
| **IL-10RA** |  |  |  |  |  |  |  |  |  |  |
| rs10091841 | T | G | 0.0640 | 0.0135 | 2.13E-06 |  | -0.0552 | 0.0079 | 0.0020 | 22.47 |
| rs143313574 | T | C | -0.3868 | 0.0841 | 4.24E-06 |  | 0.0610 | 0.0241 | 0.0021 | 21.15 |
| rs17832137 | A | G | 0.1676 | 0.0343 | 1.03E-06 |  | -0.1139 | 0.0173 | 0.0023 | 23.87 |
| rs180893431 | A | C | 0.4057 | 0.0865 | 2.73E-06 |  | 0.0731 | 0.0799 | 0.0023 | 21.99 |
| rs286605 | T | G | 0.0623 | 0.0131 | 1.98E-06 |  | 0.1272 | 0.0078 | 0.0019 | 22.61 |
| rs3135932 | A | G | -0.0844 | 0.0168 | 5.07E-07 |  | 0.1443 | 0.0096 | 0.0021 | 25.23 |
| rs41272625 | T | G | 0.0820 | 0.0179 | 4.63E-06 |  | -0.2702 | 0.0127 | 0.0018 | 20.98 |
| rs6670799 | A | G | -0.1247 | 0.0252 | 7.48E-07 |  | -0.0017 | 0.0131 | 0.0022 | 24.48 |
| rs74719858 | A | G | 0.3915 | 0.0823 | 1.97E-06 |  | 0.0374 | 0.0204 | 0.0021 | 22.62 |
| rs80137559 | T | C | 0.2347 | 0.0511 | 4.37E-06 |  | 0.0965 | 0.0248 | 0.0018 | 21.09 |
| **IL-10RB** |  |  |  |  |  |  |  |  |  |  |
| rs111850948 | A | G | -0.0843 | 0.0181 | 3.20E-06 |  | 0.1036 | 0.0125 | 0.0015 | 21.69 |
| rs112798338 | T | C | 0.1926 | 0.0411 | 2.78E-06 |  | 0.1303 | 0.0238 | 0.0015 | 21.96 |
| rs114288486 | T | C | 0.1449 | 0.0311 | 3.17E-06 |  | -0.1342 | 0.0288 | 0.0015 | 21.70 |
| rs1153572 | T | C | -0.0548 | 0.0119 | 4.12E-06 |  | -0.1325 | 0.0077 | 0.0015 | 21.20 |
| rs116315732 | T | C | 0.1988 | 0.0402 | 7.60E-07 |  | 0.1706 | 0.0233 | 0.0017 | 24.45 |
| rs142421172 | A | G | 0.2080 | 0.0310 | 1.95E-11 |  | 0.0293 | 0.0158 | 0.0035 | 45.01 |
| rs192325200 | A | G | -0.2327 | 0.0505 | 4.07E-06 |  | -0.0042 | 0.0400 | 0.0015 | 21.23 |
| rs34361138 | A | G | 0.0532 | 0.0113 | 2.50E-06 |  | -0.1877 | 0.0078 | 0.0015 | 22.16 |
| rs55780441 | T | C | 0.1783 | 0.0348 | 3.00E-07 |  | -0.0091 | 0.0143 | 0.0018 | 26.25 |
| rs6517157 | T | C | 0.1509 | 0.0251 | 1.83E-09 |  | -0.0557 | 0.0175 | 0.0025 | 36.14 |
| rs6584485 | T | C | 0.0743 | 0.0161 | 3.93E-06 |  | -0.3151 | 0.0150 | 0.0015 | 21.29 |
| rs75710908 | A | G | 0.1586 | 0.0341 | 3.30E-06 |  | 0.1651 | 0.0184 | 0.0015 | 21.63 |
| rs7574167 | A | G | 0.0637 | 0.0135 | 2.38E-06 |  | -0.1003 | 0.0088 | 0.0017 | 22.26 |
| rs8178484 | T | C | -0.4260 | 0.0117 | 1.00E-200 |  | -0.0087 | 0.0077 | 0.0849 | 1325.52 |
| rs9685374 | A | G | -0.0618 | 0.0134 | 3.99E-06 |  | -0.3187 | 0.0084 | 0.0015 | 21.27 |
| **IL-10** |  |  |  |  |  |  |  |  |  |  |
| rs10067443 | T | C | -0.0753 | 0.0149 | 4.33E-07 |  | 0.0564 | 0.0100 | 0.0018 | 25.54 |
| rs12123181 | A | G | -0.0996 | 0.0151 | 4.22E-11 |  | 0.0983 | 0.0095 | 0.0030 | 43.50 |
| rs138203589 | T | G | 0.1937 | 0.0418 | 3.59E-06 |  | -0.1352 | 0.0245 | 0.0015 | 21.47 |
| rs17654493 | T | C | 0.2951 | 0.0626 | 2.43E-06 |  | 0.1022 | 0.0364 | 0.0018 | 22.22 |
| rs188535859 | T | C | -0.2351 | 0.0486 | 1.32E-06 |  | -0.0875 | 0.0318 | 0.0016 | 23.40 |
| rs3135932 | A | G | -0.1597 | 0.0154 | 3.39E-25 |  | 0.0763 | 0.0096 | 0.0072 | 107.53 |
| rs385697 | T | C | 0.0555 | 0.0119 | 3.10E-06 |  | 0.2313 | 0.0078 | 0.0015 | 21.75 |
| rs389239 | A | G | -0.0574 | 0.0125 | 4.39E-06 |  | 0.2786 | 0.0080 | 0.0015 | 21.08 |
| rs398518 | A | G | -0.1293 | 0.0218 | 3.01E-09 |  | 0.0240 | 0.0139 | 0.0025 | 35.17 |
| rs4655953 | A | G | 0.0565 | 0.0121 | 3.02E-06 |  | 0.2749 | 0.0079 | 0.0015 | 21.80 |
| rs66624860 | T | C | 0.0681 | 0.0143 | 1.91E-06 |  | -0.0493 | 0.0079 | 0.0018 | 22.68 |
| rs72701782 | A | G | 0.0981 | 0.0211 | 3.33E-06 |  | -0.1379 | 0.0117 | 0.0015 | 21.61 |
| **IL-12B** |  |  |  |  |  |  |  |  |  |  |
| rs11039216 | T | C | 0.0588 | 0.0116 | 4.00E-07 |  | -0.0962 | 0.0077 | 0.0017 | 25.69 |
| rs11130215 | A | G | -0.1009 | 0.0151 | 2.36E-11 |  | 0.0574 | 0.0086 | 0.0030 | 44.64 |
| rs117888068 | T | C | 0.2190 | 0.0472 | 3.49E-06 |  | 0.0198 | 0.0278 | 0.0018 | 21.52 |
| rs1398590 | A | G | -0.1970 | 0.0363 | 5.73E-08 |  | 0.0633 | 0.0270 | 0.0020 | 29.45 |
| rs144850787 | T | G | 0.3161 | 0.0560 | 1.66E-08 |  | 0.1628 | 0.0428 | 0.0022 | 31.86 |
| rs148549227 | T | C | 0.1088 | 0.0228 | 1.82E-06 |  | 0.1309 | 0.0134 | 0.0018 | 22.77 |
| rs149993822 | T | C | 0.0984 | 0.0194 | 3.93E-07 |  | 0.0448 | 0.0112 | 0.0018 | 25.72 |
| rs17056751 | A | G | 0.1694 | 0.0325 | 1.87E-07 |  | 0.1672 | 0.0164 | 0.0018 | 27.16 |
| rs17722688 | T | C | -0.0857 | 0.0131 | 6.07E-11 |  | -0.0800 | 0.0086 | 0.0029 | 42.79 |
| rs1950897 | T | C | 0.0798 | 0.0128 | 4.54E-10 |  | -0.1108 | 0.0083 | 0.0026 | 38.86 |
| rs3130510 | A | G | 0.1155 | 0.0140 | 1.58E-16 |  | 0.0211 | 0.0107 | 0.0046 | 68.05 |
| rs3184504 | T | C | 0.1332 | 0.0131 | 2.76E-24 |  | 0.0582 | 0.0078 | 0.0087 | 103.37 |
| rs5014495 | T | C | 0.2070 | 0.0442 | 2.82E-06 |  | 0.0520 | 0.0164 | 0.0021 | 21.93 |
| rs6750065 | T | C | 0.0628 | 0.0134 | 2.78E-06 |  | -0.0349 | 0.0092 | 0.0015 | 21.96 |
| rs6968201 | T | G | -0.0622 | 0.0119 | 1.72E-07 |  | 0.2034 | 0.0077 | 0.0019 | 27.32 |
| rs72993671 | A | G | -0.2040 | 0.0435 | 2.74E-06 |  | 0.1647 | 0.0432 | 0.0015 | 21.99 |
| rs73416208 | A | G | -0.1477 | 0.0246 | 1.92E-09 |  | 0.1130 | 0.0136 | 0.0024 | 36.04 |
| rs780679 | T | C | -0.0695 | 0.0139 | 5.73E-07 |  | -0.1192 | 0.0089 | 0.0017 | 25.00 |
| rs8026767 | A | G | -0.0743 | 0.0132 | 1.81E-08 |  | -0.1432 | 0.0092 | 0.0021 | 31.68 |
| rs9965402 | A | G | 0.0918 | 0.0201 | 4.94E-06 |  | 0.1296 | 0.0131 | 0.0014 | 20.86 |
| **IL-13** |  |  |  |  |  |  |  |  |  |  |
| rs10446322 | A | G | 0.0640 | 0.0132 | 1.24E-06 |  | -0.1251 | 0.0083 | 0.0020 | 23.50 |
| rs10917637 | A | G | 0.0692 | 0.0136 | 3.61E-07 |  | 0.2669 | 0.0082 | 0.0022 | 25.89 |
| rs11251952 | A | G | -0.1845 | 0.0397 | 3.36E-06 |  | -0.0608 | 0.0149 | 0.0019 | 21.59 |
| rs13119159 | A | G | 0.0739 | 0.0132 | 2.16E-08 |  | 0.0654 | 0.0077 | 0.0028 | 31.34 |
| rs141726773 | T | C | 0.2093 | 0.0446 | 2.69E-06 |  | -0.0460 | 0.0192 | 0.0019 | 22.02 |
| rs149979178 | A | G | 0.1832 | 0.0390 | 2.63E-06 |  | 0.0232 | 0.0151 | 0.0032 | 22.06 |
| rs55924857 | T | C | -0.0934 | 0.0183 | 3.33E-07 |  | -0.1341 | 0.0103 | 0.0022 | 26.04 |
| rs59235092 | A | G | 0.2122 | 0.0439 | 1.34E-06 |  | -0.1622 | 0.0219 | 0.0020 | 23.36 |
| rs76219628 | A | G | 0.1690 | 0.0357 | 2.20E-06 |  | 0.1891 | 0.0235 | 0.0020 | 22.41 |
| rs9881117 | A | G | -0.0656 | 0.0141 | 3.28E-06 |  | -0.1343 | 0.0079 | 0.0018 | 21.64 |
| **IL-15RA** |  |  |  |  |  |  |  |  |  |  |
| rs117428573 | A | C | -0.3132 | 0.0684 | 4.67E-06 |  | -0.0074 | 0.0325 | 0.0019 | 20.96 |
| rs145793996 | A | G | -0.2278 | 0.0492 | 3.66E-06 |  | 0.0211 | 0.0220 | 0.0018 | 21.43 |
| rs2836464 | A | G | 0.0796 | 0.0169 | 2.48E-06 |  | 0.0328 | 0.0110 | 0.0019 | 22.18 |
| rs4459616 | T | C | 0.1400 | 0.0294 | 1.92E-06 |  | 0.0077 | 0.0175 | 0.0023 | 22.67 |
| rs7137828 | T | C | -0.0748 | 0.0133 | 1.87E-08 |  | 0.0994 | 0.0078 | 0.0028 | 31.62 |
| rs9270551 | A | G | 0.0749 | 0.0153 | 9.81E-07 |  | 0.1055 | 0.0081 | 0.0021 | 23.96 |
| **IL-17A** |  |  |  |  |  |  |  |  |  |  |
| rs12599620 | T | C | -0.0726 | 0.0153 | 2.08E-06 |  | -0.0058 | 0.0083 | 0.0020 | 22.51 |
| rs17448036 | A | G | -0.0585 | 0.0128 | 4.87E-06 |  | -0.0572 | 0.0077 | 0.0018 | 20.88 |
| rs2429911 | T | C | 0.2309 | 0.0486 | 2.02E-06 |  | 0.1331 | 0.0380 | 0.0020 | 22.57 |
| rs33998516 | A | C | -0.0802 | 0.0164 | 1.01E-06 |  | 0.1500 | 0.0085 | 0.0021 | 23.91 |
| rs34557923 | T | G | 0.2446 | 0.0517 | 2.23E-06 |  | 0.0154 | 0.0339 | 0.0020 | 22.38 |
| rs4877075 | A | G | 0.0908 | 0.0192 | 2.25E-06 |  | 0.1644 | 0.0103 | 0.0020 | 22.36 |
| rs75788494 | T | C | -0.2432 | 0.0525 | 3.61E-06 |  | -0.0476 | 0.0331 | 0.0020 | 21.45 |
| rs77529534 | T | C | -0.1279 | 0.0272 | 2.57E-06 |  | -0.0140 | 0.0120 | 0.0019 | 22.11 |
| rs77595989 | T | G | 0.1696 | 0.0371 | 4.84E-06 |  | 0.0156 | 0.0169 | 0.0018 | 20.89 |
| **IL-17C** |  |  |  |  |  |  |  |  |  |  |
| rs1072074 | A | G | -0.0649 | 0.0141 | 4.17E-06 |  | -0.0503 | 0.0080 | 0.0018 | 21.18 |
| rs10870773 | A | G | -0.0816 | 0.0171 | 1.82E-06 |  | 0.0662 | 0.0088 | 0.0020 | 22.77 |
| rs11931996 | T | C | -0.1219 | 0.0262 | 3.28E-06 |  | 0.2924 | 0.0171 | 0.0019 | 21.64 |
| rs12092228 | T | G | 0.1508 | 0.0327 | 4.00E-06 |  | 0.0918 | 0.0166 | 0.0021 | 21.26 |
| rs12863903 | T | C | -0.0857 | 0.0180 | 1.93E-06 |  | 0.0199 | 0.0102 | 0.0020 | 22.66 |
| rs12895022 | T | C | 0.1091 | 0.0236 | 3.78E-06 |  | 0.2334 | 0.0133 | 0.0018 | 21.37 |
| rs17700884 | T | G | -0.1050 | 0.0136 | 1.16E-14 |  | 0.0721 | 0.0077 | 0.0050 | 59.60 |
| rs72815428 | T | C | -0.1673 | 0.0366 | 4.85E-06 |  | -0.0494 | 0.0346 | 0.0018 | 20.89 |
| **IL-18R1** |  |  |  |  |  |  |  |  |  |  |
| rs117145942 | A | G | -0.3006 | 0.0649 | 3.63E-06 |  | -0.2585 | 0.0531 | 0.0016 | 21.45 |
| rs117195704 | A | G | -0.1505 | 0.0313 | 1.52E-06 |  | 0.1479 | 0.0252 | 0.0016 | 23.12 |
| rs117599131 | A | C | -0.1483 | 0.0317 | 2.89E-06 |  | 0.0907 | 0.0173 | 0.0017 | 21.88 |
| rs1760941 | A | C | 0.0657 | 0.0142 | 3.71E-06 |  | -0.0879 | 0.0098 | 0.0015 | 21.40 |
| rs2570479 | A | C | 0.0660 | 0.0135 | 1.01E-06 |  | 0.0775 | 0.0078 | 0.0021 | 23.90 |
| rs2732865 | A | C | 0.3635 | 0.0303 | 3.70E-33 |  | 0.0151 | 0.0273 | 0.0097 | 143.90 |
| rs28929474 | T | C | 0.2643 | 0.0445 | 2.86E-09 |  | -0.1499 | 0.0275 | 0.0024 | 35.27 |
| rs35021151 | A | G | -0.1646 | 0.0342 | 1.49E-06 |  | 0.0941 | 0.0210 | 0.0016 | 23.16 |
| rs62257659 | A | G | -0.2015 | 0.0420 | 1.61E-06 |  | 0.1212 | 0.0336 | 0.0016 | 23.01 |
| rs73176827 | T | C | -0.1045 | 0.0220 | 2.03E-06 |  | 0.1222 | 0.0162 | 0.0015 | 22.56 |
| rs7512350 | A | G | 0.0921 | 0.0201 | 4.60E-06 |  | -0.0716 | 0.0114 | 0.0018 | 20.99 |
| rs7642750 | A | C | 0.0935 | 0.0200 | 2.94E-06 |  | 0.2533 | 0.0121 | 0.0019 | 21.85 |
| rs78035061 | A | C | 0.1039 | 0.0222 | 2.87E-06 |  | -0.0810 | 0.0147 | 0.0015 | 21.90 |
| rs78199195 | A | G | -0.0956 | 0.0196 | 1.07E-06 |  | 0.2784 | 0.0139 | 0.0017 | 23.79 |
| rs79097546 | T | C | -0.2754 | 0.0560 | 8.75E-07 |  | 0.1931 | 0.0536 | 0.0017 | 24.18 |
| rs80317525 | A | G | 0.1408 | 0.0299 | 2.49E-06 |  | 0.0085 | 0.0340 | 0.0015 | 22.17 |
| **IL-18** |  |  |  |  |  |  |  |  |  |  |
| rs12648080 | A | G | 0.0720 | 0.0146 | 8.16E-07 |  | -0.0816 | 0.0106 | 0.0016 | 24.32 |
| rs12711729 | T | C | -0.0702 | 0.0153 | 4.47E-06 |  | -0.0306 | 0.0086 | 0.0019 | 21.05 |
| rs148504635 | A | C | 0.2532 | 0.0525 | 1.42E-06 |  | -0.1212 | 0.0330 | 0.0016 | 23.26 |
| rs17229943 | A | C | -0.1600 | 0.0267 | 2.07E-09 |  | -0.0074 | 0.0128 | 0.0024 | 35.91 |
| rs2108621 | T | C | 0.0581 | 0.0126 | 4.01E-06 |  | -0.2104 | 0.0084 | 0.0015 | 21.26 |
| rs35495214 | T | C | 0.1374 | 0.0291 | 2.34E-06 |  | 0.0330 | 0.0282 | 0.0015 | 22.29 |
| rs4140444 | A | G | 0.2157 | 0.0461 | 2.88E-06 |  | 0.0372 | 0.0288 | 0.0015 | 21.89 |
| rs56836641 | T | C | -0.1630 | 0.0301 | 6.12E-08 |  | -0.0110 | 0.0150 | 0.0020 | 29.32 |
| rs5744249 | A | C | 0.2039 | 0.0135 | 1.53E-51 |  | 0.0173 | 0.0090 | 0.0152 | 228.09 |
| rs60235102 | T | C | 0.1154 | 0.0225 | 2.91E-07 |  | 0.0256 | 0.0127 | 0.0018 | 26.30 |
| rs67424072 | T | G | -0.0820 | 0.0165 | 6.71E-07 |  | 0.0038 | 0.0097 | 0.0017 | 24.69 |
| rs77994606 | A | G | -0.2314 | 0.0472 | 9.46E-07 |  | -0.0231 | 0.0260 | 0.0016 | 24.03 |
| **IL-20RA** |  |  |  |  |  |  |  |  |  |  |
| rs113153423 | A | G | 0.1913 | 0.0407 | 2.60E-06 |  | -0.0071 | 0.0279 | 0.0019 | 22.09 |
| rs12056343 | T | G | -0.0761 | 0.0166 | 4.55E-06 |  | -0.0136 | 0.0086 | 0.0021 | 21.01 |
| rs143067549 | T | C | -0.4166 | 0.0910 | 4.69E-06 |  | -0.1215 | 0.0751 | 0.0029 | 20.95 |
| rs544388667 | A | G | 0.3626 | 0.0750 | 1.33E-06 |  | -0.1997 | 0.0243 | 0.0025 | 23.37 |
| **IL-20** |  |  |  |  |  |  |  |  |  |  |
| rs114209791 | A | G | -0.2134 | 0.0460 | 3.50E-06 |  | -0.1002 | 0.0285 | 0.0018 | 21.52 |
| rs114363239 | T | C | -0.2372 | 0.0487 | 1.11E-06 |  | 0.0784 | 0.0394 | 0.0020 | 23.72 |
| rs117977288 | T | G | -0.1546 | 0.0316 | 9.96E-07 |  | -0.2721 | 0.0183 | 0.0020 | 23.93 |
| rs12498781 | A | G | 0.0635 | 0.0137 | 3.57E-06 |  | -0.2487 | 0.0093 | 0.0018 | 21.48 |
| rs138771212 | A | G | -0.3596 | 0.0778 | 3.80E-06 |  | 0.0470 | 0.0474 | 0.0019 | 21.36 |
| rs146918864 | T | C | -0.2551 | 0.0515 | 7.29E-07 |  | 0.0158 | 0.0198 | 0.0021 | 24.53 |
| rs188205021 | T | C | -0.2220 | 0.0427 | 2.00E-07 |  | 0.0156 | 0.0366 | 0.0023 | 27.03 |
| rs200680034 | A | G | -0.3598 | 0.0710 | 4.03E-07 |  | -0.0033 | 0.0600 | 0.0031 | 25.67 |
| rs28542561 | T | C | -0.1753 | 0.0372 | 2.45E-06 |  | 0.0193 | 0.0196 | 0.0019 | 22.20 |
| rs72633862 | T | G | -0.1722 | 0.0376 | 4.65E-06 |  | 0.0104 | 0.0194 | 0.0018 | 20.97 |
| rs72659995 | T | C | -0.1232 | 0.0267 | 3.95E-06 |  | -0.0540 | 0.0145 | 0.0019 | 21.29 |
| **IL-22RA1** |  |  |  |  |  |  |  |  |  |  |
| rs117263973 | A | G | 0.3467 | 0.0752 | 4.02E-06 |  | 0.0142 | 0.0493 | 0.0020 | 21.25 |
| rs12240324 | A | G | 0.2203 | 0.0470 | 2.77E-06 |  | 0.0097 | 0.0193 | 0.0019 | 21.97 |
| rs13257574 | T | C | 0.2714 | 0.0584 | 3.36E-06 |  | 0.1042 | 0.0393 | 0.0019 | 21.59 |
| rs1473089 | A | C | 0.2679 | 0.0561 | 1.79E-06 |  | 0.3382 | 0.0773 | 0.0021 | 22.80 |
| rs17256492 | T | C | -0.0751 | 0.0162 | 3.56E-06 |  | 0.0623 | 0.0105 | 0.0019 | 21.49 |
| rs3181361 | T | C | 0.2700 | 0.0582 | 3.50E-06 |  | 0.0662 | 0.0382 | 0.0019 | 21.52 |
| rs56282088 | A | G | 0.2815 | 0.0571 | 8.23E-07 |  | 0.1114 | 0.0763 | 0.0022 | 24.30 |
| rs78594373 | T | C | -0.1271 | 0.0273 | 3.23E-06 |  | 0.0656 | 0.0184 | 0.0018 | 21.67 |
| **IL-24** |  |  |  |  |  |  |  |  |  |  |
| rs11256610 | A | G | 0.3005 | 0.0641 | 2.76E-06 |  | -0.2813 | 0.1083 | 0.0020 | 21.97 |
| rs143986178 | A | G | 0.2969 | 0.0644 | 4.02E-06 |  | 0.0806 | 0.0748 | 0.0020 | 21.25 |
| rs167018 | A | G | 0.0657 | 0.0136 | 1.36E-06 |  | 0.1042 | 0.0077 | 0.0021 | 23.33 |
| rs60306270 | A | G | -0.0886 | 0.0191 | 3.51E-06 |  | 0.0421 | 0.0137 | 0.0018 | 21.51 |
| rs73169406 | A | G | 0.1110 | 0.0207 | 8.22E-08 |  | 0.0002 | 0.0126 | 0.0025 | 28.75 |
| **IL-33** |  |  |  |  |  |  |  |  |  |  |
| rs1013434 | T | C | -0.0732 | 0.0158 | 3.61E-06 |  | -0.0537 | 0.0091 | 0.0018 | 21.46 |
| rs112495884 | A | G | 0.3432 | 0.0748 | 4.47E-06 |  | -0.0879 | 0.0284 | 0.0019 | 21.05 |
| rs13336496 | A | C | 0.0936 | 0.0203 | 4.01E-06 |  | -0.0166 | 0.0139 | 0.0018 | 21.26 |
| rs66755903 | A | G | -0.0752 | 0.0162 | 3.45E-06 |  | -0.0224 | 0.0090 | 0.0019 | 21.54 |
| rs77792454 | T | C | -0.1166 | 0.0255 | 4.82E-06 |  | -0.0334 | 0.0123 | 0.0024 | 20.90 |
| **CXCL1** |  |  |  |  |  |  |  |  |  |  |
| rs10734292 | A | G | 0.1230 | 0.0267 | 4.09E-06 |  | -0.0895 | 0.0180 | 0.0018 | 21.22 |
| rs11880837 | A | G | 0.0583 | 0.0127 | 4.42E-06 |  | 0.0853 | 0.0080 | 0.0015 | 21.07 |
| rs1366946 | T | C | -0.3134 | 0.0134 | 5.65E-121 |  | 0.0481 | 0.0092 | 0.0358 | 546.93 |
| rs2122155 | A | G | -0.0538 | 0.0117 | 4.26E-06 |  | -0.0458 | 0.0078 | 0.0014 | 21.14 |
| rs2280441 | A | G | -0.1443 | 0.0312 | 3.75E-06 |  | 0.1455 | 0.0258 | 0.0014 | 21.39 |
| rs4474574 | T | C | -0.3650 | 0.0779 | 2.79E-06 |  | -0.1610 | 0.1843 | 0.0023 | 21.95 |
| rs62311721 | T | C | -0.1860 | 0.0407 | 4.88E-06 |  | 0.0386 | 0.0166 | 0.0015 | 20.88 |
| **CXCL5** |  |  |  |  |  |  |  |  |  |  |
| rs10403201 | A | G | -0.0601 | 0.0127 | 2.22E-06 |  | -0.0691 | 0.0089 | 0.0015 | 22.39 |
| rs10821552 | A | C | -0.1132 | 0.0156 | 3.97E-13 |  | -0.0594 | 0.0079 | 0.0053 | 52.64 |
| rs11734099 | A | G | 0.0769 | 0.0153 | 5.00E-07 |  | -0.0542 | 0.0099 | 0.0017 | 25.26 |
| rs146553494 | A | G | 0.1844 | 0.0377 | 1.00E-06 |  | 0.0909 | 0.0339 | 0.0016 | 23.92 |
| rs2004100 | T | C | 0.0675 | 0.0147 | 4.39E-06 |  | 0.0008 | 0.0093 | 0.0016 | 21.08 |
| rs3183927 | A | G | -0.0619 | 0.0121 | 3.13E-07 |  | -0.3380 | 0.0078 | 0.0018 | 26.17 |
| rs425535 | T | C | 0.5063 | 0.0181 | 3.52E-172 |  | -0.0143 | 0.0122 | 0.0504 | 782.35 |
| rs4279906 | T | C | 0.2082 | 0.0420 | 7.15E-07 |  | 0.0019 | 0.0197 | 0.0017 | 24.57 |
| rs59312158 | A | G | -0.1900 | 0.0385 | 8.01E-07 |  | 0.0300 | 0.0295 | 0.0018 | 24.35 |
| rs7636889 | A | G | -0.0768 | 0.0137 | 2.07E-08 |  | -0.0822 | 0.0096 | 0.0021 | 31.42 |
| rs79649467 | T | G | -0.1721 | 0.0276 | 4.50E-10 |  | 0.0309 | 0.0134 | 0.0027 | 38.88 |
| **CXCL6** |  |  |  |  |  |  |  |  |  |  |
| rs11547311 | T | C | 0.1285 | 0.0272 | 2.31E-06 |  | 0.0091 | 0.0248 | 0.0017 | 22.32 |
| rs12075 | A | G | 0.0816 | 0.0115 | 1.29E-12 |  | -0.1018 | 0.0077 | 0.0034 | 50.34 |
| rs182381042 | A | G | -0.3831 | 0.0799 | 1.63E-06 |  | -0.3625 | 0.1203 | 0.0018 | 22.99 |
| rs184103539 | T | C | -0.1603 | 0.0351 | 4.95E-06 |  | -0.0272 | 0.0147 | 0.0016 | 20.85 |
| rs34080302 | T | G | 0.0605 | 0.0131 | 3.87E-06 |  | 0.0093 | 0.0083 | 0.0015 | 21.33 |
| rs9371716 | T | C | -0.0919 | 0.0193 | 1.92E-06 |  | -0.1232 | 0.0111 | 0.0018 | 22.67 |
| **CXCL9** |  |  |  |  |  |  |  |  |  |  |
| rs114033894 | T | G | -0.2245 | 0.0488 | 4.22E-06 |  | 0.0175 | 0.0200 | 0.0015 | 21.16 |
| rs12191307 | A | G | -0.1452 | 0.0197 | 1.70E-13 |  | -0.0005 | 0.0136 | 0.0038 | 54.32 |
| rs142119726 | T | C | 0.2705 | 0.0551 | 9.14E-07 |  | -0.0609 | 0.0245 | 0.0017 | 24.10 |
| rs192119373 | T | G | 0.6177 | 0.1287 | 1.59E-06 |  | -0.6901 | 0.4149 | 0.0026 | 23.03 |
| rs35435997 | A | G | 0.0915 | 0.0200 | 4.76E-06 |  | -0.2149 | 0.0129 | 0.0016 | 20.93 |
| rs62200304 | A | C | -0.1150 | 0.0244 | 2.44E-06 |  | -0.1861 | 0.0192 | 0.0016 | 22.21 |
| rs62272916 | A | G | -0.0834 | 0.0176 | 2.15E-06 |  | -0.0051 | 0.0114 | 0.0015 | 22.45 |
| rs656739 | A | G | 0.0562 | 0.0119 | 2.33E-06 |  | -0.0149 | 0.0078 | 0.0015 | 22.30 |
| rs73194812 | A | G | 0.1821 | 0.0391 | 3.20E-06 |  | -0.1127 | 0.0239 | 0.0015 | 21.69 |
| rs73606147 | A | C | 0.2792 | 0.0590 | 2.22E-06 |  | 0.0362 | 0.0418 | 0.0017 | 22.39 |
| rs7600322 | T | C | 0.0570 | 0.0118 | 1.36E-06 |  | -0.0501 | 0.0080 | 0.0017 | 23.33 |
| rs80348644 | T | C | 0.1546 | 0.0332 | 3.21E-06 |  | -0.0998 | 0.0208 | 0.0015 | 21.68 |
| rs9366778 | A | G | -0.0605 | 0.0115 | 1.43E-07 |  | 0.0376 | 0.0077 | 0.0019 | 27.67 |
| **CXCL10** |  |  |  |  |  |  |  |  |  |  |
| rs10481754 | T | C | -0.0548 | 0.0119 | 4.12E-06 |  | 0.1946 | 0.0077 | 0.0015 | 21.20 |
| rs1077965 | A | G | -0.0546 | 0.0118 | 3.71E-06 |  | 0.2302 | 0.0077 | 0.0015 | 21.41 |
| rs112202639 | A | G | -0.1609 | 0.0336 | 1.68E-06 |  | -0.0657 | 0.0187 | 0.0016 | 22.93 |
| rs115140093 | T | C | -0.5186 | 0.0420 | 5.02E-35 |  | 0.0324 | 0.0292 | 0.0102 | 152.44 |
| rs12155428 | T | C | -0.1765 | 0.0375 | 2.52E-06 |  | -0.3640 | 0.0477 | 0.0015 | 22.15 |
| rs12174864 | A | G | -0.0582 | 0.0121 | 1.51E-06 |  | -0.0960 | 0.0078 | 0.0016 | 23.13 |
| rs12476448 | T | C | 0.0536 | 0.0115 | 3.15E-06 |  | 0.1696 | 0.0077 | 0.0015 | 21.72 |
| rs12629593 | T | G | -0.0879 | 0.0182 | 1.37E-06 |  | -0.0303 | 0.0140 | 0.0016 | 23.32 |
| rs12646113 | T | C | 0.0977 | 0.0136 | 6.78E-13 |  | 0.2125 | 0.0089 | 0.0035 | 51.60 |
| rs150519056 | T | C | -0.1841 | 0.0376 | 9.77E-07 |  | -0.0214 | 0.0215 | 0.0018 | 23.97 |
| rs1563171 | A | G | 0.0592 | 0.0127 | 3.14E-06 |  | -0.0896 | 0.0083 | 0.0015 | 21.73 |
| rs2349689 | A | G | -0.0789 | 0.0164 | 1.50E-06 |  | 0.0840 | 0.0100 | 0.0016 | 23.14 |
| rs2523495 | T | C | 0.1095 | 0.0196 | 2.31E-08 |  | 0.0765 | 0.0133 | 0.0021 | 31.21 |
| rs3184504 | T | C | 0.1138 | 0.0131 | 3.72E-18 |  | 0.0681 | 0.0078 | 0.0064 | 75.45 |
| rs4367871 | T | C | -0.0567 | 0.0119 | 1.89E-06 |  | 0.1160 | 0.0077 | 0.0016 | 22.70 |
| rs4804148 | T | C | -0.0629 | 0.0130 | 1.31E-06 |  | 0.1221 | 0.0084 | 0.0016 | 23.41 |
| rs55732300 | A | G | 0.1175 | 0.0250 | 2.60E-06 |  | 0.0773 | 0.0210 | 0.0015 | 22.09 |
| rs72651343 | T | C | -0.6096 | 0.0619 | 6.98E-23 |  | -0.0255 | 0.0460 | 0.0068 | 96.97 |
| rs72682331 | A | G | 0.1089 | 0.0209 | 1.88E-07 |  | -0.1876 | 0.0129 | 0.0018 | 27.15 |
| rs741344 | A | G | -0.0600 | 0.0130 | 3.92E-06 |  | 0.0248 | 0.0079 | 0.0015 | 21.30 |
| **CXCL11** |  |  |  |  |  |  |  |  |  |  |
| rs10733789 | T | C | -0.0815 | 0.0127 | 1.39E-10 |  | 0.0317 | 0.0084 | 0.0029 | 41.18 |
| rs10898158 | A | G | 0.0609 | 0.0121 | 4.83E-07 |  | 0.0756 | 0.0085 | 0.0018 | 25.33 |
| rs111787182 | A | C | -0.1445 | 0.0314 | 4.19E-06 |  | 0.1267 | 0.0166 | 0.0016 | 21.17 |
| rs112884138 | T | C | -0.0976 | 0.0209 | 3.01E-06 |  | 0.0126 | 0.0182 | 0.0015 | 21.80 |
| rs116470923 | T | C | -0.1975 | 0.0427 | 3.74E-06 |  | -0.0869 | 0.0517 | 0.0014 | 21.39 |
| rs12433317 | A | G | 0.0571 | 0.0120 | 1.95E-06 |  | 0.0559 | 0.0078 | 0.0016 | 22.64 |
| rs2245786 | A | G | -0.0599 | 0.0131 | 4.82E-06 |  | 0.0128 | 0.0083 | 0.0014 | 20.91 |
| rs2894233 | A | G | -0.2236 | 0.0470 | 1.96E-06 |  | 0.1361 | 0.0290 | 0.0019 | 22.63 |
| rs3184504 | T | C | 0.1236 | 0.0132 | 7.70E-21 |  | 0.0627 | 0.0078 | 0.0074 | 87.66 |
| rs4748380 | T | C | 0.0901 | 0.0190 | 2.12E-06 |  | -0.0237 | 0.0132 | 0.0015 | 22.48 |
| rs59148364 | A | G | 0.1821 | 0.0378 | 1.45E-06 |  | -0.0232 | 0.0207 | 0.0016 | 23.20 |
| rs60141220 | A | G | -0.0777 | 0.0165 | 2.49E-06 |  | 0.0675 | 0.0106 | 0.0017 | 22.17 |
| rs7009937 | T | C | 0.1175 | 0.0250 | 2.60E-06 |  | -0.3652 | 0.0175 | 0.0015 | 22.09 |
| rs7222922 | T | C | -0.0882 | 0.0182 | 1.26E-06 |  | -0.3701 | 0.0132 | 0.0016 | 23.48 |
| rs72747175 | A | G | 0.1535 | 0.0326 | 2.49E-06 |  | 0.2630 | 0.0212 | 0.0015 | 22.17 |
| rs72925566 | A | G | -0.0973 | 0.0185 | 1.44E-07 |  | -0.0142 | 0.0102 | 0.0024 | 27.66 |
| rs7475335 | A | C | -0.0646 | 0.0124 | 1.89E-07 |  | 0.1550 | 0.0084 | 0.0018 | 27.14 |
| rs75612655 | T | C | 0.5352 | 0.0705 | 3.16E-14 |  | -0.0351 | 0.1905 | 0.0044 | 57.62 |
| rs7750544 | T | C | -0.0773 | 0.0164 | 2.44E-06 |  | -0.2023 | 0.0116 | 0.0016 | 22.21 |
| rs78632565 | T | C | 0.1082 | 0.0214 | 4.28E-07 |  | -0.0171 | 0.0130 | 0.0017 | 25.56 |
| **CCL2** |  |  |  |  |  |  |  |  |  |  |
| rs117317477 | T | G | -0.3227 | 0.0704 | 4.57E-06 |  | 0.1130 | 0.0179 | 0.0018 | 21.01 |
| rs117510656 | T | C | -0.2587 | 0.0562 | 4.16E-06 |  | -0.0066 | 0.0258 | 0.0015 | 21.19 |
| rs11870164 | T | C | 0.0751 | 0.0130 | 7.61E-09 |  | -0.0833 | 0.0085 | 0.0023 | 33.37 |
| rs12075 | A | G | 0.1694 | 0.0113 | 8.39E-51 |  | -0.0491 | 0.0077 | 0.0150 | 224.70 |
| rs12133241 | T | G | 0.0728 | 0.0157 | 3.54E-06 |  | 0.0733 | 0.0106 | 0.0015 | 21.50 |
| rs12367122 | A | G | 0.0739 | 0.0159 | 3.35E-06 |  | -0.1051 | 0.0102 | 0.0015 | 21.60 |
| rs146186562 | T | G | -0.2293 | 0.0497 | 3.96E-06 |  | 0.1559 | 0.0215 | 0.0015 | 21.28 |
| rs148307902 | A | G | 0.2553 | 0.0538 | 2.08E-06 |  | 0.0197 | 0.0361 | 0.0016 | 22.52 |
| rs181998213 | T | C | 0.3723 | 0.0695 | 8.47E-08 |  | 0.0134 | 0.0187 | 0.0020 | 28.69 |
| rs207311 | T | C | 0.0579 | 0.0126 | 4.32E-06 |  | -0.0772 | 0.0081 | 0.0015 | 21.11 |
| rs34292320 | T | C | -0.0684 | 0.0134 | 3.32E-07 |  | 0.1841 | 0.0088 | 0.0018 | 26.05 |
| rs35728689 | A | G | 0.3004 | 0.0198 | 5.44E-52 |  | 0.0084 | 0.0142 | 0.0154 | 230.15 |
| rs4682862 | A | G | 0.0576 | 0.0122 | 2.34E-06 |  | 0.2180 | 0.0081 | 0.0016 | 22.29 |
| rs7619350 | A | G | 0.0986 | 0.0201 | 9.32E-07 |  | 0.1742 | 0.0116 | 0.0020 | 24.06 |
| rs77128226 | T | C | -0.1063 | 0.0218 | 1.08E-06 |  | -0.0232 | 0.0169 | 0.0017 | 23.77 |
| rs77344300 | T | C | -0.1381 | 0.0293 | 2.44E-06 |  | -0.0896 | 0.0187 | 0.0015 | 22.21 |
| rs79697698 | T | C | -0.3480 | 0.0653 | 9.86E-08 |  | -0.0045 | 0.0177 | 0.0021 | 28.40 |
| rs9942602 | T | C | 0.0618 | 0.0117 | 1.28E-07 |  | 0.0222 | 0.0078 | 0.0019 | 27.90 |
| **CCL4** |  |  |  |  |  |  |  |  |  |  |
| rs111476793 | A | G | 0.0869 | 0.0190 | 4.79E-06 |  | -0.0420 | 0.0127 | 0.0016 | 20.92 |
| rs1161092 | A | G | -0.0635 | 0.0125 | 3.77E-07 |  | -0.0632 | 0.0079 | 0.0018 | 25.80 |
| rs137896358 | T | C | 0.2797 | 0.0551 | 3.85E-07 |  | -0.0621 | 0.0299 | 0.0020 | 25.76 |
| rs140505982 | T | C | -0.2294 | 0.0415 | 3.24E-08 |  | -0.1024 | 0.0395 | 0.0022 | 30.55 |
| rs1634503 | A | G | -0.0745 | 0.0138 | 6.72E-08 |  | -0.1712 | 0.0101 | 0.0020 | 29.14 |
| rs17692864 | T | C | 0.2321 | 0.0283 | 2.38E-16 |  | -0.0414 | 0.0182 | 0.0049 | 67.25 |
| rs56131468 | A | G | 0.0833 | 0.0178 | 2.87E-06 |  | -0.0340 | 0.0101 | 0.0015 | 21.90 |
| **CCL7** |  |  |  |  |  |  |  |  |  |  |
| rs12075 | A | G | -0.0899 | 0.0130 | 4.67E-12 |  | 0.0924 | 0.0077 | 0.0040 | 47.81 |
| rs146174820 | A | G | 0.2663 | 0.0547 | 1.13E-06 |  | 0.2201 | 0.0451 | 0.0023 | 23.70 |
| rs147793446 | A | G | 0.1941 | 0.0413 | 2.60E-06 |  | -0.2596 | 0.0274 | 0.0019 | 22.08 |
| rs148859911 | A | G | 0.1507 | 0.0328 | 4.34E-06 |  | -0.0536 | 0.0180 | 0.0018 | 21.11 |
| rs16947053 | A | G | 0.2264 | 0.0487 | 3.34E-06 |  | 0.0043 | 0.0313 | 0.0018 | 21.61 |
| rs182239847 | T | G | -0.1716 | 0.0359 | 1.75E-06 |  | -0.0719 | 0.0129 | 0.0024 | 22.84 |
| rs2228467 | T | C | -0.3169 | 0.0252 | 2.88E-36 |  | 0.0192 | 0.0145 | 0.0132 | 158.11 |
| rs28667091 | T | G | -0.0613 | 0.0133 | 4.05E-06 |  | 0.1556 | 0.0077 | 0.0018 | 21.24 |
| rs4146770 | T | C | -0.0933 | 0.0165 | 1.56E-08 |  | 0.0634 | 0.0100 | 0.0027 | 31.97 |
| rs481267 | A | G | -0.0754 | 0.0150 | 4.99E-07 |  | -0.0461 | 0.0080 | 0.0025 | 25.26 |
| rs7116054 | T | C | -0.0998 | 0.0179 | 2.47E-08 |  | 0.3266 | 0.0127 | 0.0027 | 31.08 |
| rs7213460 | A | G | 0.0942 | 0.0132 | 9.58E-13 |  | -0.0702 | 0.0079 | 0.0043 | 50.92 |
| rs74157668 | T | C | 0.1574 | 0.0343 | 4.46E-06 |  | -0.0420 | 0.0247 | 0.0018 | 21.05 |
| rs78848134 | T | C | 0.2441 | 0.0514 | 2.04E-06 |  | 0.3218 | 0.0332 | 0.0020 | 22.55 |
| rs9968876 | T | G | -0.1046 | 0.0221 | 2.21E-06 |  | 0.0667 | 0.0152 | 0.0019 | 22.40 |
| **CCL8** |  |  |  |  |  |  |  |  |  |  |
| rs112168535 | T | C | -0.1553 | 0.0316 | 8.90E-07 |  | -0.1088 | 0.0198 | 0.0018 | 24.15 |
| rs11652256 | A | G | -0.9051 | 0.0354 | 3.48E-144 |  | -0.0298 | 0.0224 | 0.0425 | 653.62 |
| rs12075 | A | G | -0.0973 | 0.0116 | 4.95E-17 |  | 0.0854 | 0.0077 | 0.0048 | 70.35 |
| rs138884871 | T | C | 0.2198 | 0.0473 | 3.37E-06 |  | 0.1432 | 0.0304 | 0.0016 | 21.59 |
| rs144101664 | T | C | -0.3694 | 0.0547 | 1.45E-11 |  | 0.0366 | 0.0339 | 0.0032 | 45.60 |
| rs144618566 | T | C | 0.5171 | 0.0538 | 7.15E-22 |  | 0.2595 | 0.0641 | 0.0066 | 92.37 |
| rs145516279 | A | G | 0.2225 | 0.0480 | 3.56E-06 |  | -0.0162 | 0.0295 | 0.0015 | 21.48 |
| rs16969443 | T | C | -0.4966 | 0.0757 | 5.38E-11 |  | -0.0231 | 0.0179 | 0.0040 | 43.03 |
| rs181726805 | A | G | -0.2479 | 0.0536 | 3.75E-06 |  | 0.0299 | 0.0236 | 0.0014 | 21.39 |
| rs1821142 | T | C | 0.4013 | 0.0478 | 4.64E-17 |  | -0.0284 | 0.0398 | 0.0052 | 70.47 |
| rs35904471 | T | C | 0.0761 | 0.0165 | 3.99E-06 |  | 0.0559 | 0.0083 | 0.0019 | 21.27 |
| rs407595 | A | C | 0.0697 | 0.0147 | 2.12E-06 |  | 0.2361 | 0.0090 | 0.0016 | 22.48 |
| rs4722985 | T | C | -0.0626 | 0.0133 | 2.52E-06 |  | 0.0304 | 0.0095 | 0.0015 | 22.15 |
| rs6685547 | A | G | 0.1462 | 0.0289 | 4.22E-07 |  | 0.0903 | 0.0221 | 0.0019 | 25.59 |
| rs72825048 | A | G | -0.8120 | 0.0268 | 1.00E-200 |  | -0.0250 | 0.0177 | 0.0587 | 917.87 |
| rs74350159 | A | G | 0.2798 | 0.0608 | 4.19E-06 |  | -0.1048 | 0.0400 | 0.0015 | 21.18 |
| rs75580960 | T | C | -0.0904 | 0.0188 | 1.52E-06 |  | -0.1578 | 0.0109 | 0.0017 | 23.12 |
| rs76263310 | A | G | 0.2960 | 0.0455 | 7.74E-11 |  | 0.0442 | 0.0267 | 0.0029 | 42.32 |
| rs78743764 | A | C | -0.2226 | 0.0480 | 3.53E-06 |  | -0.1741 | 0.0295 | 0.0016 | 21.50 |
| rs79567569 | A | C | -0.3284 | 0.0669 | 9.16E-07 |  | -0.4025 | 0.0684 | 0.0018 | 24.09 |
| rs80131163 | A | G | 0.1962 | 0.0399 | 8.77E-07 |  | 0.0681 | 0.0164 | 0.0016 | 24.18 |
| rs80219280 | T | G | -0.9040 | 0.0322 | 2.00E-173 |  | 0.0096 | 0.0273 | 0.0508 | 788.07 |
| rs948962 | A | C | 0.0544 | 0.0119 | 4.84E-06 |  | 0.0984 | 0.0078 | 0.0014 | 20.90 |
| rs9889517 | A | G | 0.0609 | 0.0121 | 4.83E-07 |  | -0.1492 | 0.0079 | 0.0018 | 25.33 |
| **CCL11** |  |  |  |  |  |  |  |  |  |  |
| rs114744647 | T | C | 0.2107 | 0.0451 | 2.99E-06 |  | -0.1697 | 0.0301 | 0.0015 | 21.82 |
| rs12075 | A | G | 0.0749 | 0.0114 | 5.03E-11 |  | -0.1110 | 0.0077 | 0.0029 | 43.16 |
| rs139476527 | T | G | 0.2826 | 0.0606 | 3.11E-06 |  | 0.5075 | 0.0930 | 0.0017 | 21.74 |
| rs139597204 | A | C | -0.3374 | 0.0714 | 2.30E-06 |  | -0.0211 | 0.0633 | 0.0018 | 22.33 |
| rs1564995 | A | G | -0.0609 | 0.0131 | 3.34E-06 |  | -0.0027 | 0.0078 | 0.0015 | 21.61 |
| rs2201150 | T | C | 0.0785 | 0.0123 | 1.75E-10 |  | 0.1014 | 0.0079 | 0.0028 | 40.73 |
| rs2228467 | T | C | -0.3316 | 0.0225 | 3.69E-49 |  | 0.0184 | 0.0145 | 0.0145 | 217.17 |
| rs34536806 | T | G | 0.1017 | 0.0208 | 1.01E-06 |  | 0.0405 | 0.0151 | 0.0017 | 23.90 |
| rs35543857 | A | G | -0.1138 | 0.0244 | 3.10E-06 |  | 0.1315 | 0.0132 | 0.0015 | 21.75 |
| rs6894241 | A | C | -0.0656 | 0.0137 | 1.68E-06 |  | 0.2084 | 0.0090 | 0.0016 | 22.92 |
| rs73171545 | A | G | -0.0861 | 0.0187 | 4.14E-06 |  | 0.1525 | 0.0121 | 0.0015 | 21.20 |
| rs757973 | A | G | 0.2002 | 0.0205 | 1.58E-22 |  | 0.0435 | 0.0152 | 0.0064 | 95.36 |
| rs79432525 | T | G | 0.1929 | 0.0422 | 4.85E-06 |  | 0.1545 | 0.0404 | 0.0015 | 20.89 |
| rs79684468 | T | C | 0.1502 | 0.0303 | 7.16E-07 |  | 0.2074 | 0.0188 | 0.0017 | 24.57 |
| rs79722574 | T | C | -0.1215 | 0.0156 | 6.78E-15 |  | -0.0053 | 0.0111 | 0.0041 | 60.65 |
| rs9976282 | A | G | -0.1678 | 0.0345 | 1.15E-06 |  | -0.1547 | 0.0274 | 0.0016 | 23.65 |
| **CCL13** |  |  |  |  |  |  |  |  |  |  |
| rs10140592 | A | G | 0.2704 | 0.0553 | 1.01E-06 |  | 0.0604 | 0.0240 | 0.0017 | 23.91 |
| rs115511138 | A | G | 0.1956 | 0.0420 | 3.21E-06 |  | 0.1093 | 0.0424 | 0.0016 | 21.69 |
| rs12075 | A | G | 0.1890 | 0.0114 | 9.89E-62 |  | -0.0440 | 0.0077 | 0.0183 | 274.82 |
| rs144118870 | A | G | 0.1749 | 0.0368 | 2.01E-06 |  | 0.0782 | 0.0196 | 0.0015 | 22.59 |
| rs2497351 | T | C | 0.0668 | 0.0145 | 4.09E-06 |  | -0.0292 | 0.0097 | 0.0014 | 21.22 |
| rs2631360 | A | G | 0.0609 | 0.0131 | 3.34E-06 |  | 0.3487 | 0.0081 | 0.0018 | 21.61 |
| rs2721961 | T | G | -0.1201 | 0.0133 | 1.72E-19 |  | 0.0203 | 0.0083 | 0.0057 | 81.53 |
| rs3136676 | A | G | 0.3903 | 0.0251 | 1.60E-54 |  | 0.0084 | 0.0171 | 0.0162 | 241.76 |
| rs3917900 | A | G | 0.1557 | 0.0120 | 1.70E-38 |  | 0.0242 | 0.0081 | 0.0113 | 168.33 |
| rs55842014 | A | G | -0.0638 | 0.0131 | 1.11E-06 |  | -0.2516 | 0.0085 | 0.0019 | 23.72 |
| rs62201455 | A | C | -0.2136 | 0.0451 | 2.18E-06 |  | 0.0427 | 0.0175 | 0.0015 | 22.43 |
| rs62336911 | T | C | 0.1569 | 0.0332 | 2.29E-06 |  | -0.0714 | 0.0212 | 0.0016 | 22.33 |
| rs72825017 | T | G | -0.1997 | 0.0251 | 1.77E-15 |  | -0.1635 | 0.0170 | 0.0043 | 63.29 |
| rs74794857 | T | C | 0.0674 | 0.0139 | 1.24E-06 |  | 0.0216 | 0.0080 | 0.0020 | 23.51 |
| rs7612912 | T | C | 0.1281 | 0.0120 | 1.33E-26 |  | 0.1069 | 0.0081 | 0.0077 | 113.94 |
| rs8112014 | A | G | -0.0578 | 0.0126 | 4.49E-06 |  | -0.1028 | 0.0089 | 0.0014 | 21.04 |
| rs847767 | A | G | 0.0770 | 0.0168 | 4.58E-06 |  | 0.3424 | 0.0103 | 0.0014 | 21.00 |
| rs926646 | T | C | 0.1432 | 0.0304 | 2.47E-06 |  | -0.0711 | 0.0206 | 0.0015 | 22.19 |
| **CCL19** |  |  |  |  |  |  |  |  |  |  |
| rs10242459 | A | G | 0.0729 | 0.0154 | 2.20E-06 |  | 0.0742 | 0.0106 | 0.0015 | 22.41 |
| rs11574915 | A | C | -0.1464 | 0.0170 | 7.19E-18 |  | -0.1503 | 0.0106 | 0.0050 | 74.15 |
| rs138440733 | A | G | -0.1724 | 0.0360 | 1.68E-06 |  | 0.0670 | 0.0165 | 0.0018 | 22.93 |
| rs147708384 | T | C | -0.2707 | 0.0574 | 2.40E-06 |  | -0.1232 | 0.0509 | 0.0016 | 22.24 |
| rs34791102 | A | G | 0.1238 | 0.0265 | 2.99E-06 |  | 0.1742 | 0.0234 | 0.0015 | 21.82 |
| rs3792790 | A | C | 0.0551 | 0.0120 | 4.40E-06 |  | -0.0589 | 0.0077 | 0.0015 | 21.08 |
| rs4554017 | T | C | 0.0596 | 0.0122 | 1.03E-06 |  | 0.0718 | 0.0078 | 0.0017 | 23.86 |
| rs4907572 | A | G | -0.0671 | 0.0137 | 9.69E-07 |  | -0.0719 | 0.0085 | 0.0016 | 23.99 |
| rs62292952 | T | G | 0.2346 | 0.0185 | 7.53E-37 |  | -0.0922 | 0.0115 | 0.0108 | 160.79 |
| rs6870560 | T | C | 0.0863 | 0.0169 | 3.28E-07 |  | -0.1562 | 0.0104 | 0.0018 | 26.07 |
| rs79086127 | T | C | -0.2096 | 0.0450 | 3.20E-06 |  | -0.3722 | 0.0543 | 0.0015 | 21.69 |
| **CCL20** |  |  |  |  |  |  |  |  |  |  |
| rs10207134 | T | C | -0.0996 | 0.0128 | 7.18E-15 |  | -0.0016 | 0.0091 | 0.0042 | 60.54 |
| rs10837780 | T | C | 0.1191 | 0.0260 | 4.63E-06 |  | 0.2371 | 0.0168 | 0.0015 | 20.98 |
| rs1129474 | T | C | 0.0573 | 0.0120 | 1.80E-06 |  | 0.0542 | 0.0077 | 0.0016 | 22.80 |
| rs11582772 | T | C | 0.2585 | 0.0548 | 2.39E-06 |  | 0.0078 | 0.0580 | 0.0016 | 22.25 |
| rs151092565 | T | C | -0.1512 | 0.0328 | 4.03E-06 |  | 0.1752 | 0.0247 | 0.0014 | 21.25 |
| rs2796032 | T | C | 0.0636 | 0.0127 | 5.50E-07 |  | 0.0709 | 0.0082 | 0.0017 | 25.08 |
| rs35833676 | T | C | 0.0804 | 0.0166 | 1.28E-06 |  | 0.1411 | 0.0117 | 0.0016 | 23.46 |
| rs41302923 | A | G | 0.1939 | 0.0414 | 2.82E-06 |  | 0.0787 | 0.0239 | 0.0015 | 21.93 |
| rs4981022 | A | G | 0.0635 | 0.0128 | 7.02E-07 |  | 0.1333 | 0.0083 | 0.0017 | 24.61 |
| rs5769672 | T | G | -0.1184 | 0.0257 | 4.09E-06 |  | -0.2257 | 0.0278 | 0.0014 | 21.22 |
| rs6420556 | T | C | -0.0736 | 0.0158 | 3.19E-06 |  | 0.1322 | 0.0100 | 0.0015 | 21.70 |
| rs73072893 | A | G | 0.2057 | 0.0422 | 1.09E-06 |  | -0.0158 | 0.0210 | 0.0018 | 23.76 |
| rs9274623 | T | G | -0.0760 | 0.0148 | 2.82E-07 |  | -0.0365 | 0.0110 | 0.0018 | 26.37 |
| **CCL23** |  |  |  |  |  |  |  |  |  |  |
| rs1001495 | T | C | 0.0983 | 0.0215 | 4.83E-06 |  | 0.0858 | 0.0133 | 0.0015 | 20.90 |
| rs11017721 | A | G | 0.0971 | 0.0186 | 1.79E-07 |  | 0.0026 | 0.0127 | 0.0019 | 27.25 |
| rs113959305 | T | C | -0.1397 | 0.0285 | 9.50E-07 |  | 0.1564 | 0.0226 | 0.0018 | 24.02 |
| rs116683909 | A | G | -0.2100 | 0.0426 | 8.24E-07 |  | -0.2613 | 0.0240 | 0.0016 | 24.30 |
| rs117639761 | A | C | -0.3246 | 0.0413 | 3.85E-15 |  | -0.0674 | 0.0268 | 0.0042 | 61.76 |
| rs12949647 | A | G | -0.0643 | 0.0137 | 2.69E-06 |  | -0.2932 | 0.0084 | 0.0015 | 22.03 |
| rs146074782 | A | G | -0.3061 | 0.0626 | 1.01E-06 |  | 0.0324 | 0.0362 | 0.0018 | 23.91 |
| rs1926742 | A | G | 0.0574 | 0.0125 | 4.39E-06 |  | 0.0423 | 0.0083 | 0.0014 | 21.08 |
| rs2870238 | T | C | 0.0574 | 0.0114 | 4.78E-07 |  | -0.0260 | 0.0077 | 0.0017 | 25.35 |
| rs4317138 | T | C | 0.0585 | 0.0127 | 4.10E-06 |  | 0.0180 | 0.0081 | 0.0015 | 21.22 |
| rs438811 | T | C | 0.0669 | 0.0138 | 1.25E-06 |  | -0.3224 | 0.0091 | 0.0016 | 23.50 |
| rs4719850 | T | C | -0.0548 | 0.0118 | 3.42E-06 |  | 0.0287 | 0.0085 | 0.0015 | 21.56 |
| rs73071153 | A | G | -0.1497 | 0.0319 | 2.70E-06 |  | 0.0824 | 0.0219 | 0.0015 | 22.02 |
| rs73114426 | A | G | 0.0948 | 0.0207 | 4.66E-06 |  | -0.2017 | 0.0127 | 0.0014 | 20.97 |
| rs74491711 | A | G | 0.1273 | 0.0278 | 4.67E-06 |  | -0.1624 | 0.0168 | 0.0014 | 20.97 |
| rs77354000 | A | G | -0.2064 | 0.0437 | 2.32E-06 |  | 0.0894 | 0.0266 | 0.0015 | 22.30 |
| rs77527696 | T | C | -0.2538 | 0.0465 | 4.81E-08 |  | -0.0175 | 0.0216 | 0.0021 | 29.79 |
| **CCL25** |  |  |  |  |  |  |  |  |  |  |
| rs10792444 | T | C | -0.0865 | 0.0181 | 1.76E-06 |  | 0.0839 | 0.0121 | 0.0015 | 22.84 |
| rs11028036 | A | G | 0.0546 | 0.0117 | 3.06E-06 |  | 0.0554 | 0.0078 | 0.0015 | 21.77 |
| rs116534774 | T | C | 0.3717 | 0.0777 | 1.72E-06 |  | -0.0105 | 0.0739 | 0.0021 | 22.88 |
| rs12606983 | T | C | -0.0673 | 0.0134 | 5.10E-07 |  | -0.0167 | 0.0084 | 0.0017 | 25.22 |
| rs1705699 | T | C | -0.0546 | 0.0116 | 2.52E-06 |  | 0.0593 | 0.0077 | 0.0015 | 22.15 |
| rs521795 | T | C | -0.0624 | 0.0122 | 3.14E-07 |  | 0.0702 | 0.0077 | 0.0018 | 26.16 |
| rs636479 | A | G | 0.0548 | 0.0119 | 4.12E-06 |  | 0.1553 | 0.0080 | 0.0014 | 21.20 |
| rs7137942 | A | G | -0.0637 | 0.0133 | 1.67E-06 |  | -0.0004 | 0.0081 | 0.0018 | 22.94 |
| rs7611785 | A | G | 0.0941 | 0.0198 | 2.01E-06 |  | 0.1602 | 0.0112 | 0.0015 | 22.58 |
| rs7806274 | T | C | -0.0755 | 0.0161 | 2.74E-06 |  | 0.0863 | 0.0101 | 0.0016 | 21.99 |
| rs79990760 | A | G | 0.2192 | 0.0478 | 4.52E-06 |  | 0.1326 | 0.0247 | 0.0014 | 21.03 |
| rs851850 | A | G | -0.0777 | 0.0163 | 1.87E-06 |  | 0.0736 | 0.0110 | 0.0016 | 22.72 |
| **CCL28** |  |  |  |  |  |  |  |  |  |  |
| rs112641086 | T | C | -0.1056 | 0.0198 | 9.64E-08 |  | 0.0655 | 0.0122 | 0.0019 | 28.44 |
| rs116782490 | A | C | 0.2298 | 0.0488 | 2.49E-06 |  | 0.1246 | 0.0654 | 0.0018 | 22.17 |
| rs139902 | A | C | 0.0684 | 0.0121 | 1.58E-08 |  | 0.2146 | 0.0080 | 0.0022 | 31.95 |
| rs143400203 | T | C | 0.1812 | 0.0392 | 3.79E-06 |  | -0.1382 | 0.0219 | 0.0014 | 21.36 |
| rs1514964 | T | C | -0.1263 | 0.0264 | 1.72E-06 |  | 0.0284 | 0.0197 | 0.0016 | 22.88 |
| rs2477954 | T | C | -0.0580 | 0.0120 | 1.34E-06 |  | 0.1739 | 0.0079 | 0.0016 | 23.36 |
| rs2631360 | A | G | 0.0597 | 0.0128 | 3.10E-06 |  | 0.3557 | 0.0081 | 0.0018 | 21.75 |
| rs4866742 | T | C | 0.0702 | 0.0122 | 8.71E-09 |  | 0.1622 | 0.0078 | 0.0026 | 33.10 |
| rs546951873 | A | G | 0.3427 | 0.0672 | 3.40E-07 |  | 0.2236 | 0.0381 | 0.0023 | 26.00 |
| rs6580980 | A | G | -0.0688 | 0.0118 | 5.53E-09 |  | -0.1686 | 0.0083 | 0.0024 | 33.99 |
| rs6671688 | T | C | 0.0534 | 0.0116 | 4.16E-06 |  | -0.0236 | 0.0077 | 0.0015 | 21.19 |
| rs73000929 | A | G | -0.1935 | 0.0355 | 5.02E-08 |  | 0.0535 | 0.0229 | 0.0020 | 29.71 |
| rs76291845 | A | G | 0.2696 | 0.0542 | 6.55E-07 |  | -0.1017 | 0.0317 | 0.0017 | 24.74 |
| rs7661151 | T | C | 0.0531 | 0.0116 | 4.70E-06 |  | -0.1641 | 0.0079 | 0.0014 | 20.95 |
| rs76669782 | A | C | -0.2853 | 0.0513 | 2.68E-08 |  | 0.2957 | 0.0919 | 0.0024 | 30.92 |
| rs77569365 | T | G | 0.1290 | 0.0282 | 4.77E-06 |  | -0.1567 | 0.0221 | 0.0014 | 20.92 |
| rs78552613 | T | C | -0.1844 | 0.0395 | 3.04E-06 |  | -0.0897 | 0.0266 | 0.0015 | 21.79 |
| rs78843608 | A | G | -0.1684 | 0.0323 | 1.85E-07 |  | -0.2401 | 0.0266 | 0.0018 | 27.18 |
| **CX3CL1** |  |  |  |  |  |  |  |  |  |  |
| rs10778675 | A | C | 0.0792 | 0.0158 | 5.37E-07 |  | 0.0396 | 0.0107 | 0.0018 | 25.12 |
| rs114359340 | A | G | -0.1881 | 0.0405 | 3.41E-06 |  | 0.0315 | 0.0349 | 0.0016 | 21.57 |
| rs11682107 | A | G | -0.0675 | 0.0126 | 8.45E-08 |  | 0.0279 | 0.0077 | 0.0023 | 28.69 |
| rs117698194 | A | G | -0.1996 | 0.0432 | 3.83E-06 |  | 0.0613 | 0.0347 | 0.0015 | 21.34 |
| rs12331618 | A | G | -0.0582 | 0.0114 | 3.30E-07 |  | -0.0211 | 0.0078 | 0.0018 | 26.06 |
| rs13167439 | T | C | -0.0903 | 0.0193 | 2.89E-06 |  | -0.2660 | 0.0119 | 0.0015 | 21.89 |
| rs2442752 | T | C | -0.0589 | 0.0117 | 4.80E-07 |  | -0.1865 | 0.0081 | 0.0017 | 25.34 |
| rs2731674 | T | G | -0.0681 | 0.0128 | 1.04E-07 |  | 0.0481 | 0.0088 | 0.0019 | 28.30 |
| rs35026817 | T | G | 0.0633 | 0.0122 | 2.12E-07 |  | 0.1025 | 0.0084 | 0.0018 | 26.92 |
| rs3732378 | A | G | 0.0941 | 0.0154 | 9.94E-10 |  | 0.0172 | 0.0105 | 0.0025 | 37.33 |
| rs55896747 | T | C | 0.1129 | 0.0244 | 3.71E-06 |  | -0.1940 | 0.0198 | 0.0015 | 21.41 |
| rs56397903 | A | G | 0.1968 | 0.0424 | 3.46E-06 |  | 0.1520 | 0.0186 | 0.0015 | 21.54 |
| rs571946532 | A | C | -0.2404 | 0.0512 | 2.66E-06 |  | -0.0363 | 0.0317 | 0.0019 | 22.04 |
| rs635634 | T | C | -0.1145 | 0.0166 | 5.29E-12 |  | -0.0236 | 0.0095 | 0.0040 | 47.57 |
| rs6937696 | T | C | -0.0811 | 0.0120 | 1.40E-11 |  | 0.0297 | 0.0080 | 0.0031 | 45.67 |
| rs712137 | A | C | 0.0563 | 0.0120 | 2.71E-06 |  | 0.3937 | 0.0086 | 0.0015 | 22.01 |
| rs77915710 | A | G | -0.1436 | 0.0304 | 2.32E-06 |  | -0.0473 | 0.0355 | 0.0015 | 22.31 |
| rs8052631 | A | G | -0.1511 | 0.0270 | 2.19E-08 |  | 0.0900 | 0.0184 | 0.0022 | 31.31 |
| **MIP-1 alpha** |  |  |  |  |  |  |  |  |  |  |
| rs113448118 | A | G | 0.0818 | 0.0179 | 4.88E-06 |  | -0.2764 | 0.0116 | 0.0018 | 20.88 |
| rs1143687 | T | C | -0.1229 | 0.0240 | 3.04E-07 |  | -0.1783 | 0.0172 | 0.0018 | 26.22 |
| rs2847249 | T | C | -0.0621 | 0.0136 | 4.97E-06 |  | 0.0594 | 0.0084 | 0.0015 | 20.85 |
| rs677925 | T | C | -0.0668 | 0.0143 | 2.99E-06 |  | -0.1462 | 0.0088 | 0.0018 | 21.82 |
| rs7137828 | T | C | -0.0837 | 0.0133 | 3.11E-10 |  | 0.0888 | 0.0078 | 0.0035 | 39.60 |
| rs78871521 | T | C | 0.1812 | 0.0371 | 1.04E-06 |  | -0.1163 | 0.0221 | 0.0018 | 23.85 |
| rs9540456 | A | G | 0.0926 | 0.0181 | 3.12E-07 |  | -0.1431 | 0.0143 | 0.0018 | 26.17 |
| rs9911791 | A | G | 0.1760 | 0.0162 | 1.71E-27 |  | -0.1286 | 0.0088 | 0.0082 | 118.01 |
| **Beta-NGF** |  |  |  |  |  |  |  |  |  |  |
| rs117164089 | T | C | -0.2710 | 0.0565 | 1.61E-06 |  | -0.2169 | 0.0610 | 0.0017 | 23.00 |
| rs12188775 | T | G | 0.1213 | 0.0247 | 9.06E-07 |  | 0.0036 | 0.0175 | 0.0016 | 24.11 |
| rs12259196 | A | G | -0.0750 | 0.0148 | 4.03E-07 |  | 0.0201 | 0.0108 | 0.0019 | 25.68 |
| rs12533747 | A | G | 0.1389 | 0.0276 | 4.84E-07 |  | -0.0989 | 0.0159 | 0.0018 | 25.32 |
| rs140072192 | A | G | 0.2773 | 0.0602 | 4.10E-06 |  | -0.2029 | 0.0612 | 0.0018 | 21.21 |
| rs148834134 | T | C | 0.2541 | 0.0556 | 4.87E-06 |  | -0.1229 | 0.0584 | 0.0016 | 20.88 |
| rs17647697 | A | C | -0.1617 | 0.0352 | 4.35E-06 |  | -0.0189 | 0.0244 | 0.0014 | 21.10 |
| rs17689534 | A | G | 0.2208 | 0.0462 | 1.76E-06 |  | -0.3183 | 0.0636 | 0.0017 | 22.84 |
| rs1878359 | A | G | 0.0626 | 0.0126 | 6.76E-07 |  | 0.0941 | 0.0084 | 0.0017 | 24.68 |
| rs3128517 | T | C | -0.0775 | 0.0118 | 5.11E-11 |  | -0.0673 | 0.0077 | 0.0030 | 43.13 |
| rs34559191 | T | C | 0.0607 | 0.0124 | 9.82E-07 |  | -0.1268 | 0.0084 | 0.0017 | 23.96 |
| rs397081 | T | C | 0.1203 | 0.0262 | 4.40E-06 |  | 0.0579 | 0.0209 | 0.0014 | 21.08 |
| rs4017 | T | C | -0.1187 | 0.0258 | 4.21E-06 |  | -0.2061 | 0.0242 | 0.0014 | 21.16 |
| rs62092633 | T | C | -0.1249 | 0.0259 | 1.42E-06 |  | -0.0970 | 0.0112 | 0.0020 | 23.25 |
| rs62494116 | T | C | 0.0578 | 0.0117 | 7.81E-07 |  | -0.3059 | 0.0084 | 0.0017 | 24.40 |
| rs6328 | A | C | -0.0797 | 0.0122 | 6.46E-11 |  | 0.2340 | 0.0082 | 0.0032 | 42.67 |
| rs72673086 | A | G | 0.0584 | 0.0126 | 3.57E-06 |  | -0.0335 | 0.0080 | 0.0017 | 21.48 |
| rs77493302 | T | C | 0.0853 | 0.0185 | 4.01E-06 |  | -0.0104 | 0.0122 | 0.0014 | 21.26 |
| rs9479501 | T | G | 0.0629 | 0.0137 | 4.41E-06 |  | -0.0152 | 0.0093 | 0.0014 | 21.08 |
| **DNER** |  |  |  |  |  |  |  |  |  |  |
| rs10191831 | T | C | -0.0591 | 0.0125 | 2.27E-06 |  | -0.2354 | 0.0077 | 0.0018 | 22.35 |
| rs1133851 | A | G | -0.0664 | 0.0142 | 2.92E-06 |  | -0.0461 | 0.0092 | 0.0015 | 21.86 |
| rs13107325 | T | C | 0.1066 | 0.0233 | 4.76E-06 |  | 0.4625 | 0.0324 | 0.0014 | 20.93 |
| rs194746 | T | C | 0.0528 | 0.0112 | 2.43E-06 |  | 0.0382 | 0.0077 | 0.0015 | 22.22 |
| rs207671 | A | G | 0.1016 | 0.0117 | 3.83E-18 |  | 0.0768 | 0.0078 | 0.0053 | 75.40 |
| rs2837988 | A | C | 0.0576 | 0.0118 | 1.05E-06 |  | -0.0370 | 0.0082 | 0.0016 | 23.82 |
| rs28689968 | T | C | 0.0918 | 0.0184 | 6.07E-07 |  | -0.1036 | 0.0104 | 0.0017 | 24.89 |
| rs35032874 | T | G | 0.1320 | 0.0132 | 1.52E-23 |  | -0.0485 | 0.0083 | 0.0070 | 99.99 |
| rs75685422 | T | C | 0.0879 | 0.0186 | 2.29E-06 |  | -0.1317 | 0.0137 | 0.0016 | 22.33 |
| rs9289590 | T | C | -0.0652 | 0.0142 | 4.40E-06 |  | -0.1981 | 0.0089 | 0.0017 | 21.08 |
| rs9967959 | T | G | 0.0718 | 0.0152 | 2.32E-06 |  | 0.0070 | 0.0105 | 0.0015 | 22.31 |
| **FGF-5** |  |  |  |  |  |  |  |  |  |  |
| rs11120686 | T | C | -0.0599 | 0.0127 | 2.40E-06 |  | -0.0120 | 0.0079 | 0.0019 | 22.24 |
| rs112790107 | A | G | 0.5090 | 0.1062 | 1.64E-06 |  | 0.1298 | 0.0232 | 0.0023 | 22.97 |
| rs11674185 | A | G | -0.0586 | 0.0128 | 4.69E-06 |  | 0.0262 | 0.0081 | 0.0018 | 20.96 |
| rs117253850 | T | C | 0.2266 | 0.0453 | 5.67E-07 |  | 0.2018 | 0.0362 | 0.0021 | 25.02 |
| rs12005489 | T | C | 0.1509 | 0.0322 | 2.78E-06 |  | 0.2360 | 0.0183 | 0.0020 | 21.96 |
| rs1412253 | A | G | -0.0909 | 0.0192 | 2.20E-06 |  | -0.0002 | 0.0121 | 0.0019 | 22.41 |
| rs144059387 | A | G | 0.4543 | 0.0594 | 2.04E-14 |  | 0.0802 | 0.0360 | 0.0059 | 58.48 |
| rs148332905 | T | C | 0.2883 | 0.0608 | 2.12E-06 |  | -0.0134 | 0.0330 | 0.0020 | 22.48 |
| rs148797749 | A | G | -0.1705 | 0.0361 | 2.32E-06 |  | -0.0303 | 0.0181 | 0.0019 | 22.30 |
| rs150524893 | A | G | 0.2554 | 0.0552 | 3.71E-06 |  | 0.0592 | 0.0292 | 0.0019 | 21.40 |
| rs189846846 | T | C | -0.3042 | 0.0659 | 3.91E-06 |  | 0.0700 | 0.0808 | 0.0021 | 21.30 |
| rs192746810 | A | G | -0.1842 | 0.0395 | 3.11E-06 |  | 0.1608 | 0.0202 | 0.0019 | 21.74 |
| rs305897 | T | C | 0.1185 | 0.0249 | 1.95E-06 |  | 0.0059 | 0.0151 | 0.0020 | 22.64 |
| rs4326078 | A | C | -0.0728 | 0.0150 | 1.21E-06 |  | 0.0123 | 0.0094 | 0.0020 | 23.55 |
| rs4970834 | T | C | -0.0729 | 0.0155 | 2.56E-06 |  | 0.0329 | 0.0097 | 0.0019 | 22.12 |
| rs56391958 | A | G | -0.1197 | 0.0249 | 1.53E-06 |  | 0.1181 | 0.0137 | 0.0020 | 23.11 |
| rs62298642 | A | G | 0.1131 | 0.0207 | 4.66E-08 |  | -0.0534 | 0.0152 | 0.0026 | 29.85 |
| rs624605 | T | G | 0.0619 | 0.0133 | 3.25E-06 |  | 0.1752 | 0.0078 | 0.0019 | 21.66 |
| rs66613644 | T | C | -0.0826 | 0.0165 | 5.56E-07 |  | 0.0333 | 0.0103 | 0.0021 | 25.06 |
| rs75140224 | A | G | 0.1456 | 0.0311 | 2.85E-06 |  | 0.2596 | 0.0205 | 0.0019 | 21.91 |
| rs9433760 | A | G | 0.1023 | 0.0224 | 4.95E-06 |  | 0.0812 | 0.0140 | 0.0018 | 20.85 |
| **FGF-19** |  |  |  |  |  |  |  |  |  |  |
| rs117398067 | T | C | 0.2583 | 0.0564 | 4.65E-06 |  | 0.0289 | 0.0228 | 0.0014 | 20.97 |
| rs12110436 | T | C | -0.1360 | 0.0297 | 4.67E-06 |  | -0.1398 | 0.0189 | 0.0014 | 20.97 |
| rs12407505 | A | G | -0.1614 | 0.0352 | 4.53E-06 |  | -0.0041 | 0.0352 | 0.0014 | 21.02 |
| rs13103023 | A | G | 0.0837 | 0.0124 | 1.48E-11 |  | -0.1201 | 0.0079 | 0.0032 | 45.56 |
| rs142067135 | A | G | -0.2295 | 0.0492 | 3.09E-06 |  | -0.2452 | 0.0505 | 0.0016 | 21.76 |
| rs145274424 | T | C | 0.1992 | 0.0421 | 2.23E-06 |  | 0.1780 | 0.0311 | 0.0015 | 22.38 |
| rs1671812 | T | C | 0.0621 | 0.0132 | 2.54E-06 |  | 0.0375 | 0.0084 | 0.0018 | 22.13 |
| rs191522330 | T | C | 0.2325 | 0.0488 | 1.89E-06 |  | -0.0544 | 0.0209 | 0.0015 | 22.70 |
| rs2306969 | A | G | 0.0674 | 0.0141 | 1.75E-06 |  | -0.0180 | 0.0094 | 0.0015 | 22.85 |
| rs35836706 | A | G | 0.2151 | 0.0456 | 2.39E-06 |  | 0.1011 | 0.0240 | 0.0015 | 22.25 |
| rs516246 | T | C | -0.1661 | 0.0118 | 5.31E-45 |  | -0.0527 | 0.0079 | 0.0133 | 198.11 |
| rs834971 | A | G | -0.0614 | 0.0128 | 1.61E-06 |  | 0.1032 | 0.0085 | 0.0016 | 23.01 |
| **FGF-21** |  |  |  |  |  |  |  |  |  |  |
| rs10495032 | T | G | -0.1557 | 0.0318 | 9.77E-07 |  | -0.0897 | 0.0149 | 0.0016 | 23.97 |
| rs12290350 | T | C | -0.0689 | 0.0145 | 2.02E-06 |  | 0.0302 | 0.0100 | 0.0016 | 22.58 |
| rs1260326 | T | C | 0.1323 | 0.0119 | 1.03E-28 |  | -0.0157 | 0.0081 | 0.0083 | 123.59 |
| rs13229619 | A | G | -0.1609 | 0.0176 | 6.13E-20 |  | -0.0365 | 0.0115 | 0.0056 | 83.57 |
| rs142603673 | T | C | -0.2352 | 0.0455 | 2.35E-07 |  | -0.2979 | 0.0424 | 0.0019 | 26.72 |
| rs145127946 | A | G | -0.1747 | 0.036 | 1.22E-06 |  | -0.2857 | 0.0453 | 0.0016 | 23.55 |
| rs188758663 | A | G | -0.3801 | 0.0749 | 3.88E-07 |  | 0.0977 | 0.0550 | 0.0022 | 25.75 |
| rs2429473 | A | C | -0.0812 | 0.0147 | 3.32E-08 |  | 0.1226 | 0.0098 | 0.0021 | 30.51 |
| rs4700382 | T | C | -0.063 | 0.0136 | 3.62E-06 |  | -0.2605 | 0.0087 | 0.0015 | 21.46 |
| rs60277384 | T | C | -0.0881 | 0.019 | 3.54E-06 |  | 0.0413 | 0.0108 | 0.0015 | 21.50 |
| rs72965996 | A | G | -0.2215 | 0.0444 | 6.08E-07 |  | -0.2159 | 0.0276 | 0.0018 | 24.88 |
| rs7610704 | T | C | -0.0568 | 0.012 | 2.21E-06 |  | 0.0016 | 0.0077 | 0.0016 | 22.40 |
| **FGF-23** |  |  |  |  |  |  |  |  |  |  |
| rs11150539 | T | C | -0.0560 | 0.0119 | 2.53E-06 |  | -0.0600 | 0.0077 | 0.0015 | 22.14 |
| rs12195292 | A | G | -0.0768 | 0.0166 | 3.72E-06 |  | -0.1214 | 0.0113 | 0.0015 | 21.40 |
| rs33921462 | A | G | -0.0653 | 0.0135 | 1.32E-06 |  | -0.0937 | 0.0080 | 0.0016 | 23.39 |
| rs34551523 | A | G | 0.1704 | 0.0348 | 9.75E-07 |  | 0.0907 | 0.0224 | 0.0016 | 23.97 |
| rs671205 | T | C | 0.0708 | 0.0136 | 1.93E-07 |  | -0.0715 | 0.0086 | 0.0019 | 27.10 |
| rs7955866 | A | G | -0.0959 | 0.0178 | 7.14E-08 |  | -0.0314 | 0.0121 | 0.0020 | 29.02 |
| **HGF** |  |  |  |  |  |  |  |  |  |  |
| rs113903858 | A | G | 0.3666 | 0.0747 | 9.22E-07 |  | 0.0687 | 0.0935 | 0.0022 | 24.08 |
| rs115009171 | A | G | 0.4297 | 0.0934 | 4.21E-06 |  | 0.6113 | 0.2620 | 0.0021 | 21.16 |
| rs138848271 | T | C | -0.4050 | 0.0832 | 1.13E-06 |  | 0.0162 | 0.0882 | 0.0022 | 23.69 |
| rs2281532 | T | C | -0.0698 | 0.0151 | 3.79E-06 |  | 0.0133 | 0.0099 | 0.0015 | 21.36 |
| rs2737756 | A | G | 0.2047 | 0.0391 | 1.65E-07 |  | -0.2389 | 0.0302 | 0.0019 | 27.40 |
| rs34219417 | T | C | 0.0992 | 0.0217 | 4.84E-06 |  | -0.0930 | 0.0117 | 0.0015 | 20.90 |
| rs57193877 | T | C | 0.1572 | 0.0311 | 4.31E-07 |  | 0.2181 | 0.0260 | 0.0017 | 25.55 |
| rs5745687 | T | C | -0.1943 | 0.0242 | 9.83E-16 |  | -0.0249 | 0.0191 | 0.0044 | 64.45 |
| rs6709159 | A | G | 0.0564 | 0.0114 | 7.52E-07 |  | -0.1320 | 0.0077 | 0.0017 | 24.47 |
| rs74130123 | T | C | -0.2429 | 0.0489 | 6.79E-07 |  | -0.0001 | 0.0231 | 0.0017 | 24.67 |
| rs7620568 | A | G | -0.0856 | 0.0179 | 1.73E-06 |  | -0.1317 | 0.0105 | 0.0018 | 22.87 |
| rs8106345 | A | G | 0.0592 | 0.0127 | 3.14E-06 |  | -0.0652 | 0.0077 | 0.0017 | 21.73 |
| rs851612 | A | G | -0.1182 | 0.0257 | 4.24E-06 |  | 0.1469 | 0.0207 | 0.0015 | 21.15 |
| **LAP TGF-beta-1** |  |  |  |  |  |  |  |  |  |  |
| rs10403201 | A | G | -0.0597 | 0.0125 | 1.79E-06 |  | -0.0696 | 0.0089 | 0.0015 | 22.81 |
| rs10508556 | T | C | 0.0523 | 0.0114 | 4.48E-06 |  | -0.1536 | 0.0077 | 0.0014 | 21.04 |
| rs114152855 | T | C | -0.2990 | 0.0613 | 1.07E-06 |  | 0.1362 | 0.0405 | 0.0017 | 23.79 |
| rs143420877 | T | C | 0.1447 | 0.0303 | 1.79E-06 |  | 0.0267 | 0.0215 | 0.0015 | 22.80 |
| rs144834546 | T | C | -0.2662 | 0.0526 | 4.17E-07 |  | -0.0993 | 0.0640 | 0.0020 | 25.61 |
| rs149458216 | A | C | -0.2301 | 0.0472 | 1.09E-06 |  | 0.1411 | 0.0319 | 0.0016 | 23.76 |
| rs1800472 | A | G | -0.4623 | 0.0335 | 2.55E-43 |  | 0.0018 | 0.0213 | 0.0128 | 190.41 |
| rs183319799 | T | G | 0.2185 | 0.0461 | 2.14E-06 |  | 0.0065 | 0.0260 | 0.0015 | 22.46 |
| rs1921885 | A | C | 0.1265 | 0.0263 | 1.51E-06 |  | -0.1451 | 0.0262 | 0.0016 | 23.13 |
| rs2281119 | T | C | -0.0873 | 0.0190 | 4.33E-06 |  | 0.1476 | 0.0121 | 0.0015 | 21.11 |
| rs34536806 | T | G | 0.0989 | 0.0210 | 2.48E-06 |  | 0.0417 | 0.0151 | 0.0015 | 22.18 |
| rs34992551 | T | C | -0.0931 | 0.0199 | 2.89E-06 |  | 0.0161 | 0.0098 | 0.0015 | 21.88 |
| rs60821320 | A | C | -0.1083 | 0.0232 | 3.04E-06 |  | -0.0870 | 0.0174 | 0.0017 | 21.79 |
| rs7013321 | A | G | -0.0608 | 0.0121 | 5.04E-07 |  | -0.1004 | 0.0080 | 0.0018 | 25.25 |
| rs7247630 | T | C | 0.1378 | 0.0271 | 3.68E-07 |  | 0.1696 | 0.0151 | 0.0018 | 25.85 |
| rs73045256 | A | G | -0.1921 | 0.0276 | 3.40E-12 |  | 0.0751 | 0.0133 | 0.0034 | 48.44 |
| rs7570818 | A | G | -0.0849 | 0.0183 | 3.50E-06 |  | 0.3328 | 0.0141 | 0.0015 | 21.52 |
| rs7820135 | T | C | -0.0747 | 0.0155 | 1.44E-06 |  | 0.1194 | 0.0091 | 0.0016 | 23.22 |
| **TGF-alpha** |  |  |  |  |  |  |  |  |  |  |
| rs12270510 | T | C | 0.0959 | 0.0190 | 4.48E-07 |  | 0.2717 | 0.0121 | 0.0017 | 25.47 |
| rs149146289 | A | G | 0.2856 | 0.0569 | 5.19E-07 |  | -0.0127 | 0.0285 | 0.0018 | 25.19 |
| rs34007466 | A | G | -0.2684 | 0.0500 | 7.96E-08 |  | -0.0280 | 0.0424 | 0.0020 | 28.81 |
| rs4934441 | A | G | -0.0950 | 0.0198 | 1.60E-06 |  | -0.0139 | 0.0098 | 0.0020 | 23.02 |
| rs653178 | T | C | -0.0708 | 0.0131 | 6.50E-08 |  | 0.1014 | 0.0078 | 0.0025 | 29.20 |
| rs74130123 | T | C | -0.2601 | 0.0508 | 3.05E-07 |  | -0.0001 | 0.0231 | 0.0018 | 26.21 |
| **VEGF_A** |  |  |  |  |  |  |  |  |  |  |
| rs10822155 | A | C | 0.0838 | 0.0117 | 7.93E-13 |  | -0.0080 | 0.0079 | 0.0035 | 51.29 |
| rs114694170 | T | C | -0.1625 | 0.0267 | 1.16E-09 |  | 0.0176 | 0.0167 | 0.0025 | 37.04 |
| rs11953790 | T | C | -0.1842 | 0.0374 | 8.43E-07 |  | 0.1148 | 0.0375 | 0.0016 | 24.25 |
| rs1203834 | T | C | 0.1174 | 0.0253 | 3.48E-06 |  | 0.0769 | 0.0141 | 0.0016 | 21.53 |
| rs12784822 | A | G | -0.3266 | 0.0715 | 4.93E-06 |  | -0.2245 | 0.0397 | 0.0015 | 20.86 |
| rs144037665 | A | C | -0.2779 | 0.0603 | 4.05E-06 |  | -0.0814 | 0.0422 | 0.0018 | 21.24 |
| rs145703410 | T | C | -0.2475 | 0.0539 | 4.39E-06 |  | 0.2026 | 0.0267 | 0.0015 | 21.08 |
| rs145846107 | T | C | 0.2736 | 0.0582 | 2.59E-06 |  | 0.0482 | 0.0719 | 0.0016 | 22.10 |
| rs16883415 | T | C | -0.2200 | 0.0457 | 1.48E-06 |  | -0.0425 | 0.0333 | 0.0016 | 23.17 |
| rs2050256 | A | G | -0.0734 | 0.0152 | 1.37E-06 |  | -0.0446 | 0.0093 | 0.0016 | 23.32 |
| rs34536806 | T | G | 0.0992 | 0.0208 | 1.85E-06 |  | 0.0416 | 0.0151 | 0.0016 | 22.74 |
| rs61818787 | T | C | -0.0759 | 0.0148 | 2.92E-07 |  | 0.1775 | 0.0089 | 0.0018 | 26.30 |
| rs7688836 | A | G | -0.0685 | 0.0145 | 2.31E-06 |  | -0.0543 | 0.0094 | 0.0015 | 22.31 |
| rs9349270 | A | C | 0.1055 | 0.0188 | 2.00E-08 |  | -0.0190 | 0.0132 | 0.0022 | 31.49 |
| rs9369434 | T | C | -0.3686 | 0.0120 | 1.00E-200 |  | 0.0274 | 0.0078 | 0.0619 | 943.38 |
| **SCF** |  |  |  |  |  |  |  |  |  |  |
| rs10832027 | A | G | -0.0568 | 0.0120 | 2.21E-06 |  | -0.2658 | 0.0077 | 0.0015 | 22.40 |
| rs10894669 | A | C | -0.0606 | 0.0129 | 2.63E-06 |  | -0.2737 | 0.0083 | 0.0015 | 22.07 |
| rs11126305 | A | G | -0.0567 | 0.0116 | 1.02E-06 |  | -0.2095 | 0.0079 | 0.0016 | 23.89 |
| rs11199541 | T | C | 0.1548 | 0.0339 | 4.96E-06 |  | 0.0675 | 0.0184 | 0.0014 | 20.85 |
| rs11608458 | T | C | -0.0707 | 0.0122 | 6.83E-09 |  | 0.1259 | 0.0082 | 0.0023 | 33.58 |
| rs11877350 | A | G | 0.0538 | 0.0117 | 4.26E-06 |  | -0.0519 | 0.0078 | 0.0014 | 21.14 |
| rs12378537 | T | C | 0.1050 | 0.0219 | 1.63E-06 |  | -0.2092 | 0.0110 | 0.0020 | 22.98 |
| rs138854302 | T | C | -0.1391 | 0.0205 | 1.16E-11 |  | 0.0618 | 0.0144 | 0.0031 | 46.03 |
| rs139690 | A | G | 0.1104 | 0.0240 | 4.22E-06 |  | -0.3547 | 0.0219 | 0.0014 | 21.16 |
| rs146276488 | A | G | 0.2422 | 0.0516 | 2.68E-06 |  | 0.0285 | 0.0333 | 0.0015 | 22.03 |
| rs151246947 | A | G | 0.2116 | 0.0453 | 3.00E-06 |  | -0.0614 | 0.0181 | 0.0016 | 21.82 |
| rs16942887 | A | G | 0.1658 | 0.0171 | 3.14E-22 |  | -0.0423 | 0.0107 | 0.0063 | 94.00 |
| rs174535 | T | C | -0.0735 | 0.0121 | 1.24E-09 |  | 0.1117 | 0.0078 | 0.0025 | 36.89 |
| rs186248365 | A | G | -0.4280 | 0.0907 | 2.37E-06 |  | 0.0463 | 0.0206 | 0.0019 | 22.26 |
| rs2024570 | T | C | -0.1985 | 0.0341 | 5.85E-09 |  | 0.0313 | 0.0240 | 0.0024 | 33.88 |
| rs2133027 | A | G | 0.4722 | 0.1032 | 4.75E-06 |  | -0.0310 | 0.0245 | 0.0025 | 20.93 |
| rs2740488 | A | C | 0.1156 | 0.0133 | 3.57E-18 |  | 0.1217 | 0.0096 | 0.0051 | 75.54 |
| rs2980888 | T | C | -0.0683 | 0.0126 | 5.94E-08 |  | 0.1480 | 0.0087 | 0.0020 | 29.38 |
| rs34813411 | T | C | -0.1619 | 0.0339 | 1.79E-06 |  | 0.0169 | 0.0420 | 0.0015 | 22.81 |
| rs45617141 | T | G | 0.2803 | 0.0512 | 4.38E-08 |  | -0.0496 | 0.0650 | 0.0023 | 29.97 |
| rs557933 | A | C | -0.0553 | 0.0118 | 2.78E-06 |  | 0.0420 | 0.0077 | 0.0015 | 21.96 |
| rs6073958 | T | C | -0.2858 | 0.0144 | 1.16E-87 |  | 0.0118 | 0.0101 | 0.0260 | 393.86 |
| rs705379 | A | G | 0.0789 | 0.0120 | 4.87E-11 |  | 0.0891 | 0.0080 | 0.0030 | 43.22 |
| rs71431776 | A | C | -0.0938 | 0.0192 | 1.03E-06 |  | 0.1748 | 0.0139 | 0.0016 | 23.86 |
| rs71644719 | A | G | -0.1584 | 0.0345 | 4.40E-06 |  | -0.0234 | 0.0180 | 0.0014 | 21.08 |
| rs72847212 | T | C | -0.0721 | 0.0150 | 1.53E-06 |  | -0.0059 | 0.0103 | 0.0017 | 23.10 |
| rs7664024 | T | C | -0.0718 | 0.0153 | 2.69E-06 |  | 0.1487 | 0.0118 | 0.0015 | 22.02 |
| rs78397068 | T | C | 0.1202 | 0.0233 | 2.49E-07 |  | 0.0511 | 0.0173 | 0.0019 | 26.61 |
| rs785900 | T | C | 0.0575 | 0.0118 | 1.10E-06 |  | 0.2895 | 0.0078 | 0.0017 | 23.74 |
| **ARTN** |  |  |  |  |  |  |  |  |  |  |
| rs118115625 | T | C | 0.1703 | 0.0362 | 2.55E-06 |  | 0.0221 | 0.0321 | 0.0019 | 22.13 |
| rs1329733 | A | G | -0.0674 | 0.0136 | 7.20E-07 |  | 0.1502 | 0.0077 | 0.0022 | 24.56 |
| rs13303278 | A | C | -0.0664 | 0.0144 | 4.01E-06 |  | 0.1150 | 0.0077 | 0.0021 | 21.26 |
| rs138311590 | A | G | -0.0811 | 0.0176 | 4.07E-06 |  | 0.0018 | 0.0104 | 0.0018 | 21.23 |
| rs142585779 | T | C | 0.2119 | 0.0435 | 1.11E-06 |  | -0.0066 | 0.0208 | 0.0023 | 23.72 |
| rs17340161 | A | G | -0.0873 | 0.0189 | 3.86E-06 |  | 0.0230 | 0.0116 | 0.0019 | 21.33 |
| rs3003450 | T | G | 0.0632 | 0.0137 | 3.97E-06 |  | 0.0429 | 0.0081 | 0.0018 | 21.28 |
| rs55885546 | A | G | -0.2047 | 0.0440 | 3.28E-06 |  | 0.0918 | 0.0192 | 0.0018 | 21.64 |
| rs62277657 | A | G | 0.0833 | 0.0166 | 5.22E-07 |  | 0.0310 | 0.0103 | 0.0021 | 25.18 |
| rs76672219 | A | C | -0.3226 | 0.0682 | 2.24E-06 |  | 0.0962 | 0.0364 | 0.0020 | 22.37 |
| rs9496445 | T | C | 0.0853 | 0.0181 | 2.44E-06 |  | 0.0488 | 0.0113 | 0.0019 | 22.21 |
| **CSF-1** |  |  |  |  |  |  |  |  |  |  |
| rs115370595 | A | G | -0.2277 | 0.0496 | 4.42E-06 |  | 0.0933 | 0.0391 | 0.0015 | 21.07 |
| rs116443177 | T | C | 0.0827 | 0.0173 | 1.75E-06 |  | 0.0381 | 0.0101 | 0.0018 | 22.85 |
| rs11685487 | T | C | 0.0944 | 0.0196 | 1.46E-06 |  | 0.1011 | 0.0119 | 0.0016 | 23.19 |
| rs142421172 | A | G | 0.1439 | 0.0310 | 3.45E-06 |  | 0.0423 | 0.0158 | 0.0017 | 21.54 |
| rs17734417 | T | C | -0.1225 | 0.0265 | 3.79E-06 |  | 0.1748 | 0.0185 | 0.0014 | 21.37 |
| rs7227917 | A | G | -0.0872 | 0.0185 | 2.43E-06 |  | -0.0133 | 0.0111 | 0.0016 | 22.21 |
| rs72783071 | T | C | -0.1990 | 0.0414 | 1.53E-06 |  | -0.0063 | 0.0311 | 0.0016 | 23.10 |
| rs74849049 | T | G | -0.0914 | 0.0200 | 4.88E-06 |  | 0.1371 | 0.0127 | 0.0015 | 20.88 |
| rs7538029 | A | C | 0.0775 | 0.0165 | 2.64E-06 |  | -0.0980 | 0.0086 | 0.0019 | 22.06 |
| rs75869070 | A | G | 0.1151 | 0.0239 | 1.47E-06 |  | 0.0907 | 0.0206 | 0.0016 | 23.19 |
| **Flt3L** |  |  |  |  |  |  |  |  |  |  |
| rs10164255 | T | G | 0.0556 | 0.0121 | 4.33E-06 |  | 0.1903 | 0.0078 | 0.0014 | 21.11 |
| rs11212636 | A | G | -0.0772 | 0.0117 | 4.16E-11 |  | 0.1710 | 0.0078 | 0.0029 | 43.53 |
| rs12338549 | T | C | -0.0851 | 0.0186 | 4.76E-06 |  | -0.2449 | 0.0108 | 0.0014 | 20.93 |
| rs1379304 | T | C | 0.0603 | 0.0127 | 2.05E-06 |  | -0.2987 | 0.0079 | 0.0016 | 22.54 |
| rs141117375 | T | C | -0.1519 | 0.0331 | 4.45E-06 |  | 0.0880 | 0.0305 | 0.0015 | 21.06 |
| rs142870956 | T | C | -0.4307 | 0.0883 | 1.07E-06 |  | 0.2568 | 0.2067 | 0.0020 | 23.79 |
| rs17272847 | A | G | 0.1179 | 0.0220 | 8.36E-08 |  | -0.1130 | 0.0118 | 0.0022 | 28.72 |
| rs185979634 | T | C | 0.1483 | 0.0306 | 1.26E-06 |  | 0.1692 | 0.0301 | 0.0018 | 23.48 |
| rs1866051 | T | C | -0.0746 | 0.0115 | 8.76E-11 |  | -0.1623 | 0.0078 | 0.0028 | 42.07 |
| rs192857133 | T | C | 0.1812 | 0.0386 | 2.68E-06 |  | -0.0102 | 0.0297 | 0.0015 | 22.03 |
| rs218265 | T | C | 0.0833 | 0.0160 | 1.93E-07 |  | 0.1246 | 0.0104 | 0.0018 | 27.10 |
| rs28533776 | A | G | -0.0749 | 0.0147 | 3.48E-07 |  | 0.0925 | 0.0103 | 0.0018 | 25.96 |
| rs55633025 | A | G | 0.0725 | 0.0129 | 1.91E-08 |  | -0.0499 | 0.0077 | 0.0025 | 31.58 |
| rs57191857 | A | G | -0.1429 | 0.0299 | 1.76E-06 |  | -0.0790 | 0.0233 | 0.0015 | 22.84 |
| rs61792394 | A | G | -0.1569 | 0.0338 | 3.45E-06 |  | 0.1651 | 0.0204 | 0.0015 | 21.55 |
| rs6453962 | T | C | -0.0559 | 0.0117 | 1.77E-06 |  | 0.0121 | 0.0077 | 0.0015 | 22.82 |
| rs6925032 | A | C | 0.0676 | 0.0128 | 1.28E-07 |  | -0.2042 | 0.0090 | 0.0019 | 27.89 |
| rs72681653 | A | G | 0.1302 | 0.0266 | 9.84E-07 |  | -0.3961 | 0.0210 | 0.0016 | 23.96 |
| rs74722523 | T | C | 0.3529 | 0.0760 | 3.43E-06 |  | -0.4514 | 0.0855 | 0.0019 | 21.56 |
| rs7624160 | T | G | -0.1061 | 0.0119 | 4.84E-19 |  | -0.0532 | 0.0079 | 0.0054 | 79.48 |
| rs7625643 | A | G | 0.0611 | 0.0129 | 2.18E-06 |  | 0.0558 | 0.0077 | 0.0018 | 22.43 |
| rs76428106 | T | C | -1.1019 | 0.0524 | 3.59E-98 |  | -0.0877 | 0.0359 | 0.0311 | 442.14 |
| rs7726159 | A | C | -0.1191 | 0.0128 | 1.34E-20 |  | -0.0886 | 0.0082 | 0.0058 | 86.57 |
| rs78429945 | T | G | 0.0884 | 0.0160 | 3.29E-08 |  | -0.0053 | 0.0086 | 0.0021 | 30.52 |
| rs9381118 | T | C | 0.0643 | 0.0136 | 2.27E-06 |  | -0.1120 | 0.0092 | 0.0016 | 22.35 |
| **hGDNF** |  |  |  |  |  |  |  |  |  |  |
| rs112594435 | T | C | 0.1531 | 0.0333 | 4.27E-06 |  | -0.0909 | 0.0284 | 0.0014 | 21.14 |
| rs11740708 | A | G | -0.3888 | 0.0198 | 7.56E-86 |  | -0.0229 | 0.0145 | 0.0255 | 385.53 |
| rs138691533 | A | G | 0.2584 | 0.0539 | 1.63E-06 |  | -0.2024 | 0.0489 | 0.0016 | 22.98 |
| rs35740453 | A | G | -0.0718 | 0.0154 | 3.13E-06 |  | 0.1526 | 0.0084 | 0.0016 | 21.73 |
| rs57104839 | A | G | 0.0915 | 0.0196 | 3.04E-06 |  | 0.0105 | 0.0152 | 0.0015 | 21.79 |
| rs62243355 | T | C | -0.0981 | 0.0196 | 5.58E-07 |  | -0.1201 | 0.0123 | 0.0017 | 25.05 |
| rs77671113 | A | C | -0.1194 | 0.0208 | 9.45E-09 |  | 0.2190 | 0.0148 | 0.0022 | 32.95 |
| rs79953230 | T | C | 0.1918 | 0.0420 | 4.96E-06 |  | -0.1490 | 0.0206 | 0.0014 | 20.85 |
| rs9303102 | T | G | 0.2096 | 0.0453 | 3.71E-06 |  | -0.2175 | 0.0524 | 0.0017 | 21.41 |
| **LIF** |  |  |  |  |  |  |  |  |  |  |
| rs11127419 | T | C | 0.0707 | 0.0153 | 3.82E-06 |  | -0.0378 | 0.0084 | 0.0023 | 21.35 |
| rs11883375 | A | G | -0.1011 | 0.0197 | 2.87E-07 |  | -0.1722 | 0.0125 | 0.0022 | 26.33 |
| rs234592 | A | G | -0.0635 | 0.0136 | 3.02E-06 |  | 0.2270 | 0.0079 | 0.0019 | 21.80 |
| rs332426 | A | G | 0.1120 | 0.0238 | 2.53E-06 |  | 0.0407 | 0.0143 | 0.0019 | 22.14 |
| rs7225483 | T | G | 0.0671 | 0.0143 | 2.70E-06 |  | -0.2853 | 0.0077 | 0.0022 | 22.01 |
| rs74992559 | A | G | 0.1725 | 0.0367 | 2.60E-06 |  | -0.1473 | 0.0288 | 0.0019 | 22.09 |
| rs825264 | A | G | -0.2119 | 0.0453 | 2.90E-06 |  | -0.0870 | 0.0162 | 0.0021 | 21.88 |
| **LIF-R** |  |  |  |  |  |  |  |  |  |  |
| rs115938660 | T | C | -0.2181 | 0.0467 | 3.01E-06 |  | -0.0094 | 0.0223 | 0.0018 | 21.81 |
| rs117117000 | A | G | 0.1586 | 0.0333 | 1.91E-06 |  | 0.2484 | 0.0163 | 0.0019 | 22.68 |
| rs12754806 | A | G | 0.0563 | 0.0122 | 3.94E-06 |  | -0.1818 | 0.0077 | 0.0018 | 21.29 |
| rs147006060 | A | G | -0.2602 | 0.0566 | 4.28E-06 |  | -0.0761 | 0.0246 | 0.0018 | 21.13 |
| rs1690678 | A | C | 0.0904 | 0.0192 | 2.50E-06 |  | 0.1418 | 0.0113 | 0.0019 | 22.16 |
| rs2289779 | T | G | 0.0788 | 0.0134 | 4.09E-09 |  | 0.0049 | 0.0077 | 0.0030 | 34.58 |
| rs4937122 | T | G | 0.1262 | 0.0248 | 3.61E-07 |  | 0.0085 | 0.0126 | 0.0023 | 25.89 |
| rs6002001 | A | G | 0.6489 | 0.1417 | 4.66E-06 |  | 0.4970 | 0.1918 | 0.0030 | 20.96 |
| rs62258077 | T | C | -0.0630 | 0.0130 | 1.26E-06 |  | 0.1649 | 0.0089 | 0.0020 | 23.48 |
| rs73157388 | T | C | -0.1306 | 0.0285 | 4.60E-06 |  | -0.1067 | 0.0124 | 0.0018 | 21.00 |
| rs778016 | A | G | -0.0681 | 0.0145 | 2.65E-06 |  | 0.1516 | 0.0083 | 0.0022 | 22.05 |
| **NRTN** |  |  |  |  |  |  |  |  |  |  |
| rs10412462 | A | C | -0.1731 | 0.0366 | 2.25E-06 |  | -0.0171 | 0.0167 | 0.0019 | 22.36 |
| rs113580784 | A | G | -0.2288 | 0.0495 | 3.80E-06 |  | -0.0701 | 0.0182 | 0.0018 | 21.36 |
| rs182274799 | A | G | 0.1565 | 0.0310 | 4.46E-07 |  | 0.0665 | 0.0197 | 0.0027 | 25.48 |
| rs29630 | T | C | -0.0740 | 0.0159 | 3.25E-06 |  | -0.1259 | 0.0095 | 0.0019 | 21.66 |
| rs4360502 | A | G | -0.0652 | 0.0141 | 3.76E-06 |  | 0.2229 | 0.0082 | 0.0019 | 21.38 |
| rs62120726 | A | G | 0.0786 | 0.0172 | 4.88E-06 |  | 0.2885 | 0.0115 | 0.0018 | 20.88 |
| rs76777800 | T | C | 0.3387 | 0.0738 | 4.44E-06 |  | 0.4939 | 0.0973 | 0.0030 | 21.06 |
| rs77216559 | T | C | 0.1667 | 0.0340 | 9.44E-07 |  | 0.1049 | 0.0196 | 0.0020 | 24.03 |
| rs8033310 | T | C | 0.1332 | 0.0286 | 3.20E-06 |  | -0.1040 | 0.0150 | 0.0019 | 21.69 |
| **NT-3** |  |  |  |  |  |  |  |  |  |  |
| rs10780690 | T | G | 0.0557 | 0.0120 | 3.46E-06 |  | 0.2502 | 0.0077 | 0.0015 | 21.54 |
| rs11225042 | A | C | -0.0973 | 0.0203 | 1.64E-06 |  | -0.0564 | 0.0107 | 0.0018 | 22.97 |
| rs112418830 | T | C | 0.1366 | 0.0263 | 2.06E-07 |  | 0.1025 | 0.0147 | 0.0019 | 26.97 |
| rs12517801 | A | G | -0.0555 | 0.0121 | 4.50E-06 |  | -0.0838 | 0.0077 | 0.0014 | 21.04 |
| rs146532158 | T | C | -0.1859 | 0.0386 | 1.46E-06 |  | 0.2048 | 0.0244 | 0.0016 | 23.19 |
| rs17537796 | A | C | -0.2571 | 0.0553 | 3.33E-06 |  | 0.0236 | 0.0298 | 0.0015 | 21.61 |
| rs2034246 | A | C | 0.0582 | 0.0120 | 1.23E-06 |  | 0.0781 | 0.0078 | 0.0016 | 23.52 |
| rs2107473 | A | G | -0.2393 | 0.0507 | 2.36E-06 |  | -0.0015 | 0.0324 | 0.0017 | 22.27 |
| rs2846299 | A | G | 0.0582 | 0.0125 | 3.22E-06 |  | 0.0191 | 0.0084 | 0.0015 | 21.68 |
| rs3218587 | A | G | 0.1364 | 0.0294 | 3.49E-06 |  | -0.0844 | 0.0259 | 0.0015 | 21.52 |
| rs5751454 | T | C | 0.1823 | 0.0398 | 4.64E-06 |  | -0.0111 | 0.0202 | 0.0015 | 20.98 |
| rs73166403 | T | C | -0.0920 | 0.0200 | 4.22E-06 |  | 0.1348 | 0.0122 | 0.0015 | 21.16 |
| rs79759094 | A | G | -0.1163 | 0.0251 | 3.60E-06 |  | 0.1064 | 0.0161 | 0.0015 | 21.47 |
| **4EBP1** |  |  |  |  |  |  |  |  |  |  |
| rs10792025 | T | C | -0.0593 | 0.0124 | 1.73E-06 |  | 0.1787 | 0.0082 | 0.0016 | 22.87 |
| rs181095999 | T | C | -0.2226 | 0.0474 | 2.65E-06 |  | 0.0581 | 0.0304 | 0.0015 | 22.05 |
| rs2731672 | T | C | 0.0926 | 0.0152 | 1.11E-09 |  | -0.0367 | 0.0088 | 0.0031 | 37.11 |
| rs2856226 | T | C | -0.0995 | 0.0214 | 3.33E-06 |  | 0.0826 | 0.0149 | 0.0017 | 21.61 |
| rs356283 | T | G | 0.0588 | 0.0123 | 1.75E-06 |  | -0.0385 | 0.0088 | 0.0015 | 22.85 |
| rs3733402 | A | G | -0.1305 | 0.0116 | 2.32E-29 |  | 0.0084 | 0.0078 | 0.0085 | 126.55 |
| rs5030072 | T | C | 0.0594 | 0.0119 | 5.99E-07 |  | -0.1610 | 0.0078 | 0.0017 | 24.91 |
| rs76686678 | T | G | 0.2607 | 0.0521 | 5.62E-07 |  | 0.0771 | 0.0249 | 0.0017 | 25.04 |
| **ADA** |  |  |  |  |  |  |  |  |  |  |
| rs10024178 | T | C | -0.0925 | 0.0199 | 3.35E-06 |  | 0.0651 | 0.0114 | 0.0015 | 21.60 |
| rs111478357 | T | C | 0.2044 | 0.0440 | 3.39E-06 |  | 0.0841 | 0.0310 | 0.0016 | 21.58 |
| rs115657851 | A | G | 0.1390 | 0.0293 | 2.10E-06 |  | 0.1760 | 0.0156 | 0.0015 | 22.50 |
| rs1608554 | A | G | 0.0598 | 0.0122 | 9.50E-07 |  | 0.0103 | 0.0083 | 0.0016 | 24.02 |
| rs2527856 | T | C | 0.0562 | 0.0122 | 4.09E-06 |  | 0.2880 | 0.0078 | 0.0015 | 21.22 |
| rs541944924 | T | C | 0.1673 | 0.0358 | 2.97E-06 |  | -0.0782 | 0.0167 | 0.0015 | 21.84 |
| rs62319741 | T | C | 0.1281 | 0.0258 | 6.87E-07 |  | -0.1169 | 0.0148 | 0.0017 | 24.65 |
| rs7292320 | A | G | -0.0599 | 0.0131 | 4.82E-06 |  | 0.0926 | 0.0095 | 0.0014 | 20.91 |
| rs75492374 | A | G | 0.3552 | 0.0770 | 3.97E-06 |  | -0.1769 | 0.0524 | 0.0019 | 21.28 |
| **AXIN1** |  |  |  |  |  |  |  |  |  |  |
| rs115455827 | A | G | 0.1447 | 0.0305 | 2.09E-06 |  | 0.0250 | 0.0148 | 0.0019 | 22.50 |
| rs117097664 | A | C | 0.2444 | 0.0522 | 2.84E-06 |  | -0.0703 | 0.0292 | 0.0019 | 21.92 |
| rs148317708 | A | G | -0.2120 | 0.0420 | 4.47E-07 |  | 0.1804 | 0.0384 | 0.0023 | 25.47 |
| rs2470622 | A | G | -0.1229 | 0.0242 | 3.80E-07 |  | -0.1148 | 0.0144 | 0.0023 | 25.79 |
| rs2691530 | T | C | -0.0670 | 0.0133 | 4.71E-07 |  | 0.0330 | 0.0078 | 0.0021 | 25.37 |
| rs2712427 | A | G | 0.0626 | 0.0134 | 2.99E-06 |  | -0.0601 | 0.0078 | 0.0019 | 21.82 |
| rs428324 | T | C | 0.0692 | 0.0148 | 2.93E-06 |  | -0.0996 | 0.0078 | 0.0021 | 21.86 |
| rs7171268 | T | C | 0.1554 | 0.0329 | 2.32E-06 |  | 0.0194 | 0.0202 | 0.0020 | 22.31 |
| **CASP-8** |  |  |  |  |  |  |  |  |  |  |
| rs1034059 | A | G | 0.0681 | 0.0145 | 2.65E-06 |  | 0.0571 | 0.0086 | 0.0015 | 22.05 |
| rs11709039 | T | C | 0.0781 | 0.0168 | 3.34E-06 |  | 0.0947 | 0.0118 | 0.0015 | 21.61 |
| rs12073499 | A | C | -0.0812 | 0.0167 | 1.16E-06 |  | 0.1137 | 0.0099 | 0.0017 | 23.64 |
| rs148608719 | A | G | 0.3474 | 0.0683 | 3.65E-07 |  | -0.0053 | 0.0219 | 0.0020 | 25.87 |
| rs187405204 | T | C | 0.4195 | 0.0912 | 4.23E-06 |  | 0.1373 | 0.0364 | 0.0034 | 21.15 |
| rs34154371 | T | C | -0.2016 | 0.0422 | 1.78E-06 |  | -0.0132 | 0.0325 | 0.0017 | 22.82 |
| rs73306603 | T | C | 0.2044 | 0.0412 | 7.01E-07 |  | -0.1607 | 0.0470 | 0.0017 | 24.61 |
| rs78449258 | A | G | -0.2001 | 0.0428 | 2.94E-06 |  | -0.0088 | 0.0433 | 0.0015 | 21.85 |
| **CD5** |  |  |  |  |  |  |  |  |  |  |
| rs11622090 | T | C | -0.0588 | 0.0128 | 4.35E-06 |  | 0.1152 | 0.0088 | 0.0016 | 21.10 |
| rs117276991 | A | G | -0.1261 | 0.0256 | 8.40E-07 |  | 0.1288 | 0.0132 | 0.0017 | 24.26 |
| rs117516652 | A | G | 0.2374 | 0.0476 | 6.12E-07 |  | 0.3053 | 0.0306 | 0.0017 | 24.87 |
| rs12416520 | A | G | -0.0629 | 0.0132 | 1.89E-06 |  | 0.1131 | 0.0093 | 0.0015 | 22.70 |
| rs1259355 | A | G | 0.0569 | 0.0119 | 1.74E-06 |  | 0.3821 | 0.0079 | 0.0016 | 22.86 |
| rs17345759 | A | C | -0.1134 | 0.0245 | 3.68E-06 |  | -0.0082 | 0.0156 | 0.0015 | 21.42 |
| rs17769062 | T | C | 0.1638 | 0.0334 | 9.38E-07 |  | -0.0011 | 0.0232 | 0.0017 | 24.05 |
| rs2237450 | T | C | 0.0623 | 0.0124 | 5.06E-07 |  | -0.0562 | 0.0080 | 0.0018 | 25.24 |
| rs3104373 | T | C | 0.0973 | 0.0165 | 3.70E-09 |  | 0.0535 | 0.0111 | 0.0024 | 34.77 |
| rs3184504 | T | C | 0.1427 | 0.0128 | 7.29E-29 |  | 0.0543 | 0.0078 | 0.0104 | 124.27 |
| rs4073745 | A | G | -0.0683 | 0.0131 | 1.85E-07 |  | -0.0112 | 0.0084 | 0.0019 | 27.18 |
| rs4893 | A | G | 0.1471 | 0.0313 | 2.61E-06 |  | -0.0426 | 0.0201 | 0.0015 | 22.08 |
| rs61747728 | T | C | 0.1841 | 0.0313 | 4.06E-09 |  | 0.0160 | 0.0160 | 0.0024 | 34.59 |
| rs61768480 | A | G | 0.0695 | 0.0147 | 2.27E-06 |  | -0.0376 | 0.0084 | 0.0016 | 22.35 |
| rs7242462 | A | G | -0.1199 | 0.0187 | 1.44E-10 |  | -0.0097 | 0.0111 | 0.0029 | 41.10 |
| rs72821405 | T | C | -0.1014 | 0.0217 | 2.97E-06 |  | -0.0172 | 0.0137 | 0.0015 | 21.83 |
| **CD6** |  |  |  |  |  |  |  |  |  |  |
| rs143374617 | T | C | 0.1766 | 0.0329 | 7.97E-08 |  | -0.0321 | 0.0204 | 0.0020 | 28.81 |
| rs35086654 | T | C | -0.2416 | 0.0517 | 2.97E-06 |  | -0.3455 | 0.0673 | 0.0016 | 21.83 |
| rs4939458 | A | G | -0.0647 | 0.0128 | 4.31E-07 |  | 0.0046 | 0.0079 | 0.0020 | 25.55 |
| rs597808 | A | G | 0.1160 | 0.0134 | 4.86E-18 |  | 0.0633 | 0.0078 | 0.0066 | 74.93 |
| rs60988380 | T | C | 0.0955 | 0.0193 | 7.49E-07 |  | 0.1409 | 0.0123 | 0.0017 | 24.48 |
| rs8051133 | A | G | -0.1079 | 0.0236 | 4.83E-06 |  | 0.0730 | 0.0186 | 0.0014 | 20.90 |
| rs841332 | A | G | -0.0721 | 0.0154 | 2.84E-06 |  | 0.2256 | 0.0097 | 0.0015 | 21.92 |
| rs9691968 | A | C | 0.0646 | 0.0134 | 1.43E-06 |  | 0.0203 | 0.0094 | 0.0016 | 23.24 |
| **CD40** |  |  |  |  |  |  |  |  |  |  |
| rs117191103 | T | C | 0.3553 | 0.0437 | 4.28E-16 |  | -0.0053 | 0.0235 | 0.0045 | 66.10 |
| rs12152184 | A | G | 0.1085 | 0.0205 | 1.21E-07 |  | 0.1104 | 0.0121 | 0.0023 | 28.01 |
| rs12500563 | T | G | 0.3143 | 0.0687 | 4.76E-06 |  | 0.3290 | 0.0772 | 0.0019 | 20.93 |
| rs138897138 | A | G | 0.1090 | 0.0216 | 4.50E-07 |  | -0.0739 | 0.0138 | 0.0018 | 25.46 |
| rs3967170 | A | G | 0.0789 | 0.0170 | 3.46E-06 |  | 0.1290 | 0.0106 | 0.0015 | 21.54 |
| rs404842 | A | G | -0.0599 | 0.0123 | 1.12E-06 |  | -0.1819 | 0.0078 | 0.0017 | 23.71 |
| rs45456397 | A | C | -0.1157 | 0.0230 | 4.89E-07 |  | 0.0983 | 0.0140 | 0.0018 | 25.30 |
| rs4664334 | T | C | 0.0541 | 0.0118 | 4.55E-06 |  | -0.0876 | 0.0077 | 0.0015 | 21.02 |
| rs7250371 | T | C | 0.0686 | 0.0116 | 3.34E-09 |  | 0.0300 | 0.0083 | 0.0024 | 34.97 |
| rs8024256 | A | G | -0.0562 | 0.0121 | 3.41E-06 |  | 0.2834 | 0.0084 | 0.0015 | 21.57 |
| rs9526031 | A | C | 0.0640 | 0.0120 | 9.64E-08 |  | 0.0336 | 0.0079 | 0.0020 | 28.44 |
| rs9993874 | A | G | -0.0582 | 0.0125 | 3.22E-06 |  | -0.0718 | 0.0077 | 0.0017 | 21.67 |
| **CD244** |  |  |  |  |  |  |  |  |  |  |
| rs10903115 | A | G | -0.0559 | 0.0122 | 4.61E-06 |  | -0.0105 | 0.0077 | 0.0015 | 20.99 |
| rs10992054 | T | C | -0.3705 | 0.0763 | 1.20E-06 |  | -0.0439 | 0.0496 | 0.0019 | 23.58 |
| rs11220506 | A | G | -0.0702 | 0.0147 | 1.79E-06 |  | -0.0016 | 0.0088 | 0.0015 | 22.80 |
| rs11265488 | A | G | -0.0624 | 0.0118 | 1.24E-07 |  | 0.1348 | 0.0077 | 0.0020 | 27.96 |
| rs11265493 | A | G | 0.2122 | 0.0119 | 3.99E-71 |  | -0.0348 | 0.0079 | 0.0218 | 317.93 |
| rs114758826 | A | G | -0.1804 | 0.0337 | 8.65E-08 |  | -0.1496 | 0.0213 | 0.0019 | 28.65 |
| rs139924614 | A | G | 0.1618 | 0.0348 | 3.33E-06 |  | 0.0515 | 0.0431 | 0.0015 | 21.61 |
| rs1434219 | T | C | -0.0589 | 0.0123 | 1.68E-06 |  | 0.0234 | 0.0078 | 0.0016 | 22.93 |
| rs147033439 | A | G | 0.2053 | 0.0411 | 5.88E-07 |  | -0.2101 | 0.0325 | 0.0017 | 24.95 |
| rs149458216 | A | C | -0.2146 | 0.0470 | 4.97E-06 |  | 0.1513 | 0.0319 | 0.0014 | 20.85 |
| rs2554697 | A | G | 0.0627 | 0.0134 | 2.88E-06 |  | -0.1079 | 0.0082 | 0.0019 | 21.89 |
| rs3828139 | T | C | 0.0744 | 0.0119 | 4.05E-10 |  | -0.0547 | 0.0077 | 0.0027 | 39.08 |
| rs4672486 | A | G | 0.0661 | 0.0117 | 1.61E-08 |  | 0.1442 | 0.0077 | 0.0022 | 31.91 |
| rs56272634 | T | C | 0.0704 | 0.0126 | 2.31E-08 |  | 0.1294 | 0.0085 | 0.0021 | 31.21 |
| rs6928352 | A | G | -0.1074 | 0.0215 | 5.87E-07 |  | 0.0270 | 0.0140 | 0.0017 | 24.95 |
| rs72837690 | T | C | -0.0776 | 0.0125 | 5.37E-10 |  | -0.0824 | 0.0078 | 0.0027 | 38.53 |
| rs78142752 | T | C | 0.2288 | 0.0497 | 4.15E-06 |  | -0.1212 | 0.0249 | 0.0014 | 21.19 |
| **CDCP1** |  |  |  |  |  |  |  |  |  |  |
| rs111476793 | A | G | 0.0895 | 0.0182 | 8.76E-07 |  | -0.0408 | 0.0127 | 0.0019 | 24.18 |
| rs12290068 | A | G | 0.1221 | 0.0122 | 1.40E-23 |  | 0.0425 | 0.0084 | 0.0068 | 100.15 |
| rs146583535 | A | G | 0.4557 | 0.0968 | 2.51E-06 |  | 0.0755 | 0.0216 | 0.0026 | 22.16 |
| rs17078000 | A | G | 0.0609 | 0.0128 | 1.96E-06 |  | -0.1229 | 0.0091 | 0.0016 | 22.63 |
| rs28535751 | T | C | -0.0541 | 0.0118 | 4.55E-06 |  | -0.0596 | 0.0081 | 0.0014 | 21.02 |
| rs34027772 | T | C | 0.0757 | 0.0143 | 1.20E-07 |  | 0.0197 | 0.0083 | 0.0023 | 28.02 |
| rs35478654 | T | C | -0.1480 | 0.0312 | 2.10E-06 |  | 0.0520 | 0.0193 | 0.0015 | 22.50 |
| rs4804148 | T | C | -0.0619 | 0.0125 | 7.35E-07 |  | 0.1241 | 0.0084 | 0.0017 | 24.52 |
| rs59872649 | A | G | -0.1093 | 0.0232 | 2.46E-06 |  | 0.1267 | 0.0132 | 0.0015 | 22.19 |
| rs61782461 | T | C | -0.2176 | 0.0471 | 3.84E-06 |  | -0.0816 | 0.0479 | 0.0015 | 21.34 |
| rs6452820 | A | G | -0.0738 | 0.0159 | 3.46E-06 |  | 0.0751 | 0.0095 | 0.0015 | 21.54 |
| rs672806 | A | G | 0.0816 | 0.0116 | 2.00E-12 |  | 0.0151 | 0.0079 | 0.0035 | 49.48 |
| rs6991332 | T | C | -0.0579 | 0.0119 | 1.14E-06 |  | 0.1056 | 0.0081 | 0.0017 | 23.67 |
| rs74811341 | T | C | -0.1323 | 0.0277 | 1.79E-06 |  | 0.0022 | 0.0171 | 0.0015 | 22.81 |
| rs7506429 | A | C | 0.0737 | 0.0144 | 3.09E-07 |  | -0.1933 | 0.0096 | 0.0018 | 26.19 |
| rs7618923 | T | C | -0.1738 | 0.0151 | 1.18E-30 |  | -0.0497 | 0.0099 | 0.0092 | 132.46 |
| rs9272226 | T | C | -0.0933 | 0.0118 | 2.64E-15 |  | 0.2356 | 0.0081 | 0.0042 | 62.51 |
| **CST5** |  |  |  |  |  |  |  |  |  |  |
| rs11054069 | T | C | 0.1674 | 0.0130 | 6.07E-38 |  | -0.1149 | 0.0086 | 0.0111 | 165.79 |
| rs112961631 | T | C | 0.5656 | 0.0476 | 1.46E-32 |  | -0.0916 | 0.0306 | 0.0115 | 141.17 |
| rs12294339 | T | C | 0.0702 | 0.0118 | 2.70E-09 |  | 0.1277 | 0.0082 | 0.0024 | 35.39 |
| rs13397003 | T | G | 0.0701 | 0.0141 | 6.64E-07 |  | 0.0524 | 0.0103 | 0.0017 | 24.71 |
| rs139918398 | T | C | 0.3373 | 0.0676 | 6.05E-07 |  | -0.0217 | 0.0559 | 0.0018 | 24.89 |
| rs140505821 | A | G | 0.3276 | 0.0691 | 2.13E-06 |  | -0.0090 | 0.0326 | 0.0017 | 22.47 |
| rs141192864 | T | C | 0.1016 | 0.0213 | 1.84E-06 |  | -0.2725 | 0.0136 | 0.0015 | 22.75 |
| rs150547 | A | C | 0.0548 | 0.0119 | 4.12E-06 |  | -0.2104 | 0.0079 | 0.0015 | 21.20 |
| rs1536565 | A | G | -0.1244 | 0.0264 | 2.45E-06 |  | 0.1504 | 0.0140 | 0.0015 | 22.20 |
| rs17154027 | A | G | -0.0558 | 0.0121 | 4.00E-06 |  | 0.2055 | 0.0080 | 0.0015 | 21.26 |
| rs1797042 | T | C | -0.2278 | 0.0180 | 1.04E-36 |  | -0.0489 | 0.0140 | 0.0111 | 160.14 |
| rs4507745 | T | C | 0.0570 | 0.0122 | 2.98E-06 |  | -0.1810 | 0.0081 | 0.0016 | 21.83 |
| rs470841 | T | C | 0.0568 | 0.0119 | 1.81E-06 |  | 0.0184 | 0.0080 | 0.0015 | 22.78 |
| rs4756151 | A | C | -0.0940 | 0.0172 | 4.63E-08 |  | 0.0049 | 0.0114 | 0.0020 | 29.86 |
| rs4766797 | A | G | -0.0574 | 0.0117 | 9.30E-07 |  | 0.1710 | 0.0077 | 0.0017 | 24.07 |
| rs60586299 | T | C | -0.0654 | 0.0134 | 1.06E-06 |  | -0.2349 | 0.0090 | 0.0017 | 23.82 |
| rs6083489 | A | G | 0.2365 | 0.0474 | 6.06E-07 |  | -0.1261 | 0.0553 | 0.0017 | 24.89 |
| rs62436191 | A | G | 0.1194 | 0.0234 | 3.35E-07 |  | -0.1942 | 0.0188 | 0.0018 | 26.03 |
| rs67020211 | T | G | 0.0790 | 0.0115 | 6.44E-12 |  | 0.0289 | 0.0079 | 0.0032 | 47.18 |
| rs697699 | A | C | 0.1098 | 0.0237 | 3.61E-06 |  | -0.1724 | 0.0152 | 0.0015 | 21.46 |
| rs7275493 | T | C | -0.0572 | 0.0119 | 1.53E-06 |  | -0.0149 | 0.0082 | 0.0016 | 23.10 |
| rs72980022 | A | G | 0.0607 | 0.0126 | 1.45E-06 |  | 0.0986 | 0.0084 | 0.0016 | 23.20 |
| rs77121303 | A | G | -0.2516 | 0.0532 | 2.25E-06 |  | -0.2142 | 0.0432 | 0.0017 | 22.36 |
| rs79359257 | T | C | 0.0730 | 0.0156 | 2.88E-06 |  | 0.2637 | 0.0104 | 0.0015 | 21.89 |
| rs930735 | A | G | 0.0579 | 0.0114 | 3.80E-07 |  | 0.1969 | 0.0077 | 0.0017 | 25.79 |
| rs9327707 | T | C | 0.0590 | 0.0118 | 5.73E-07 |  | -0.0554 | 0.0078 | 0.0017 | 25.00 |
| rs9455923 | A | G | 0.0537 | 0.0115 | 3.02E-06 |  | -0.1209 | 0.0077 | 0.0015 | 21.80 |
| rs962720 | T | C | 0.0558 | 0.0119 | 2.74E-06 |  | -0.1654 | 0.0077 | 0.0015 | 21.98 |
| **EN-RAGE** |  |  |  |  |  |  |  |  |  |  |
| rs112956934 | T | C | 0.1884 | 0.0407 | 3.67E-06 |  | -0.0548 | 0.0223 | 0.0015 | 21.42 |
| rs112988802 | T | C | -0.1396 | 0.0293 | 1.89E-06 |  | -0.1046 | 0.0243 | 0.0018 | 22.70 |
| rs13384799 | T | C | -0.0622 | 0.0133 | 2.92E-06 |  | -0.1041 | 0.0081 | 0.0015 | 21.87 |
| rs147302029 | A | G | 0.1806 | 0.0345 | 1.65E-07 |  | -0.0953 | 0.0207 | 0.0020 | 27.40 |
| rs150015576 | A | C | 0.1940 | 0.0423 | 4.51E-06 |  | 0.0551 | 0.0195 | 0.0014 | 21.03 |
| rs174344 | A | G | 0.0617 | 0.0125 | 7.97E-07 |  | 0.1352 | 0.0083 | 0.0017 | 24.36 |
| rs191808657 | A | C | 0.3059 | 0.0665 | 4.22E-06 |  | -0.0393 | 0.0498 | 0.0017 | 21.16 |
| rs2425640 | A | G | -0.0583 | 0.0123 | 2.14E-06 |  | 0.1610 | 0.0079 | 0.0015 | 22.46 |
| rs3014874 | A | G | -0.1726 | 0.0137 | 2.15E-36 |  | -0.0065 | 0.0088 | 0.0110 | 158.70 |
| rs3802266 | A | G | 0.0555 | 0.0118 | 2.56E-06 |  | 0.0040 | 0.0079 | 0.0015 | 22.12 |
| rs55783131 | T | C | 0.2064 | 0.0425 | 1.19E-06 |  | 0.0253 | 0.0229 | 0.0016 | 23.58 |
| rs56268787 | T | C | -0.0936 | 0.0203 | 4.01E-06 |  | 0.1955 | 0.0154 | 0.0014 | 21.26 |
| rs78800546 | A | G | -0.2529 | 0.0534 | 2.18E-06 |  | 0.3678 | 0.0458 | 0.0016 | 22.43 |
| **IFN-gamma** |  |  |  |  |  |  |  |  |  |  |
| rs140562194 | T | C | 0.4666 | 0.0897 | 1.97E-07 |  | 0.0756 | 0.0490 | 0.0036 | 27.05 |
| rs4810686 | T | C | 0.0671 | 0.0137 | 9.69E-07 |  | -0.3247 | 0.0078 | 0.0021 | 23.98 |
| rs531747046 | T | G | 0.2684 | 0.0573 | 2.81E-06 |  | -0.1711 | 0.0267 | 0.0035 | 21.93 |
| rs61863416 | A | G | 0.1360 | 0.0283 | 1.54E-06 |  | 0.0653 | 0.0202 | 0.0020 | 23.09 |
| rs62230781 | A | G | 0.2184 | 0.0403 | 5.98E-08 |  | 0.0198 | 0.0199 | 0.0026 | 29.36 |
| rs6442763 | A | C | 0.0648 | 0.0140 | 3.68E-06 |  | 0.0107 | 0.0079 | 0.0019 | 21.42 |
| rs67101138 | T | G | 0.1461 | 0.0307 | 1.95E-06 |  | -0.0195 | 0.0178 | 0.0019 | 22.64 |
| rs704 | A | G | -0.0635 | 0.0127 | 5.73E-07 |  | -0.0023 | 0.0078 | 0.0021 | 25.00 |
| rs74903999 | T | C | 0.3485 | 0.0708 | 8.55E-07 |  | -0.0012 | 0.0357 | 0.0023 | 24.22 |
| **MMP-1** |  |  |  |  |  |  |  |  |  |  |
| rs10990535 | T | C | 0.0703 | 0.0135 | 1.91E-07 |  | -0.1995 | 0.0087 | 0.0018 | 27.11 |
| rs11673125 | T | C | -0.0585 | 0.0127 | 4.10E-06 |  | -0.0855 | 0.0089 | 0.0014 | 21.22 |
| rs116889819 | A | G | -0.1760 | 0.0300 | 4.45E-09 |  | -0.1114 | 0.0246 | 0.0023 | 34.41 |
| rs12367368 | T | G | 0.0861 | 0.0186 | 3.67E-06 |  | -0.0617 | 0.0108 | 0.0015 | 21.43 |
| rs141782294 | A | G | 0.3767 | 0.0445 | 2.56E-17 |  | 0.0359 | 0.0219 | 0.0048 | 71.65 |
| rs188626385 | T | C | -0.2509 | 0.0530 | 2.20E-06 |  | 0.4458 | 0.1101 | 0.0017 | 22.41 |
| rs2229629 | A | G | -0.3153 | 0.0673 | 2.80E-06 |  | 0.0113 | 0.0375 | 0.0020 | 21.95 |
| rs7219205 | A | G | 0.0569 | 0.0121 | 2.57E-06 |  | 0.3126 | 0.0078 | 0.0015 | 22.11 |
| rs77095316 | T | G | -0.1416 | 0.0238 | 2.69E-09 |  | 0.0309 | 0.0177 | 0.0024 | 35.39 |
| rs873675 | T | C | 0.1234 | 0.0234 | 1.34E-07 |  | 0.2215 | 0.0133 | 0.0019 | 27.81 |
| **MMP-10** |  |  |  |  |  |  |  |  |  |  |
| rs112062276 | T | G | 0.1203 | 0.0249 | 1.36E-06 |  | 0.2723 | 0.0137 | 0.0016 | 23.34 |
| rs11225354 | T | C | 0.2957 | 0.0181 | 5.38E-60 |  | 0.0337 | 0.0119 | 0.0183 | 266.86 |
| rs113958571 | A | G | -0.2315 | 0.0503 | 4.18E-06 |  | 0.1587 | 0.0562 | 0.0015 | 21.18 |
| rs1356799 | T | G | -0.0690 | 0.0150 | 4.22E-06 |  | -0.0948 | 0.0094 | 0.0015 | 21.16 |
| rs17099622 | A | G | -0.2064 | 0.0233 | 8.12E-19 |  | 0.0322 | 0.0143 | 0.0055 | 78.46 |
| rs17860955 | T | C | 1.1371 | 0.0470 | 2.60E-129 |  | 0.0373 | 0.0588 | 0.0394 | 585.25 |
| rs55804377 | A | G | -0.2185 | 0.0469 | 3.18E-06 |  | -0.0011 | 0.0182 | 0.0015 | 21.70 |
| **OPG** |  |  |  |  |  |  |  |  |  |  |
| rs10142466 | A | G | 0.0570 | 0.0109 | 1.70E-07 |  | 0.0198 | 0.0077 | 0.0019 | 27.34 |
| rs112635299 | T | G | 0.2618 | 0.0433 | 1.48E-09 |  | -0.1826 | 0.0273 | 0.0025 | 36.55 |
| rs138408096 | A | G | -0.2007 | 0.0423 | 2.09E-06 |  | -0.0657 | 0.0346 | 0.0015 | 22.51 |
| rs138557324 | T | C | -0.2253 | 0.0473 | 1.91E-06 |  | 0.0156 | 0.0575 | 0.0016 | 22.69 |
| rs1437633 | A | C | -0.0790 | 0.0147 | 7.69E-08 |  | -0.1512 | 0.0107 | 0.0022 | 28.88 |
| rs17600346 | T | C | -0.1569 | 0.0299 | 1.54E-07 |  | -0.3381 | 0.0187 | 0.0019 | 27.53 |
| rs271665 | T | C | -0.0672 | 0.0129 | 1.90E-07 |  | -0.1005 | 0.0083 | 0.0018 | 27.13 |
| rs376613127 | A | G | -0.2692 | 0.0568 | 2.14E-06 |  | -0.2384 | 0.0350 | 0.0017 | 22.46 |
| rs61968587 | A | G | -0.2671 | 0.0567 | 2.47E-06 |  | 0.0146 | 0.0497 | 0.0016 | 22.19 |
| rs74111611 | T | C | -0.1471 | 0.0298 | 7.96E-07 |  | -0.2103 | 0.0261 | 0.0017 | 24.36 |
| rs77507094 | A | G | 0.1965 | 0.0429 | 4.64E-06 |  | -0.2166 | 0.0204 | 0.0014 | 20.98 |
| rs9946923 | T | C | 0.1720 | 0.0376 | 4.77E-06 |  | -0.1783 | 0.0370 | 0.0016 | 20.92 |
| **OSM** |  |  |  |  |  |  |  |  |  |  |
| rs116928468 | A | G | -0.2566 | 0.0536 | 1.69E-06 |  | 0.0527 | 0.0161 | 0.0019 | 22.91 |
| rs2285179 | A | G | -0.0663 | 0.0122 | 5.50E-08 |  | 0.2683 | 0.0078 | 0.0021 | 29.53 |
| rs2511241 | T | C | 0.1770 | 0.0236 | 6.38E-14 |  | 0.0889 | 0.0147 | 0.0041 | 56.24 |
| rs28444486 | A | G | 0.0636 | 0.0136 | 2.92E-06 |  | 0.0350 | 0.0088 | 0.0015 | 21.87 |
| rs3859189 | A | G | 0.1101 | 0.0117 | 4.95E-21 |  | -0.0842 | 0.0077 | 0.0060 | 88.54 |
| rs559651 | T | C | -0.0594 | 0.0125 | 2.01E-06 |  | 0.1424 | 0.0080 | 0.0015 | 22.58 |
| rs61897429 | A | G | -0.0847 | 0.0170 | 6.28E-07 |  | 0.0903 | 0.0110 | 0.0017 | 24.82 |
| rs653178 | T | C | -0.0728 | 0.0132 | 3.48E-08 |  | 0.0986 | 0.0078 | 0.0026 | 30.41 |
| rs7102957 | T | C | -0.0803 | 0.0173 | 3.46E-06 |  | 0.0372 | 0.0098 | 0.0015 | 21.54 |
| rs76275710 | A | G | 0.2665 | 0.0525 | 3.85E-07 |  | -0.0034 | 0.0231 | 0.0017 | 25.76 |
| rs80303768 | A | G | -0.1520 | 0.0327 | 3.35E-06 |  | -0.1868 | 0.0353 | 0.0015 | 21.60 |
| rs9264931 | T | C | -0.1048 | 0.0191 | 4.09E-08 |  | -0.4176 | 0.0162 | 0.0020 | 30.10 |
| **PD-L1** |  |  |  |  |  |  |  |  |  |  |
| rs146328951 | A | G | -0.4926 | 0.0993 | 7.02E-07 |  | -0.0824 | 0.1007 | 0.0026 | 24.60 |
| rs2283438 | T | C | -0.0577 | 0.0120 | 1.52E-06 |  | 0.0820 | 0.0078 | 0.0016 | 23.12 |
| rs4974444 | A | G | -0.0816 | 0.0176 | 3.55E-06 |  | 0.2059 | 0.0112 | 0.0015 | 21.49 |
| rs62373966 | T | G | 0.1407 | 0.0273 | 2.55E-07 |  | 0.0650 | 0.0130 | 0.0023 | 26.56 |
| rs6917605 | T | C | 0.0554 | 0.0116 | 1.79E-06 |  | 0.1231 | 0.0077 | 0.0015 | 22.81 |
| rs7125631 | T | C | -0.0609 | 0.0128 | 1.96E-06 |  | -0.1068 | 0.0087 | 0.0016 | 22.63 |
| rs7137828 | T | C | -0.0622 | 0.0133 | 2.92E-06 |  | 0.1195 | 0.0078 | 0.0019 | 21.87 |
| rs7304709 | T | C | 0.0537 | 0.0117 | 4.44E-06 |  | -0.0389 | 0.0079 | 0.0014 | 21.06 |
| rs75510105 | A | G | 0.1933 | 0.0385 | 5.15E-07 |  | -0.1937 | 0.0347 | 0.0017 | 25.20 |
| rs822335 | T | C | -0.1295 | 0.0120 | 3.77E-27 |  | -0.0292 | 0.0080 | 0.0078 | 116.44 |
| **SIRT2** |  |  |  |  |  |  |  |  |  |  |
| rs1034059 | A | G | 0.0760 | 0.0145 | 1.59E-07 |  | 0.0512 | 0.0086 | 0.0019 | 27.47 |
| rs11115639 | A | C | -0.0841 | 0.0184 | 4.86E-06 |  | -0.0649 | 0.0108 | 0.0014 | 20.89 |
| rs115455827 | A | G | 0.1277 | 0.0277 | 4.02E-06 |  | 0.0283 | 0.0148 | 0.0014 | 21.25 |
| rs116198125 | T | C | -0.1521 | 0.0329 | 3.78E-06 |  | 0.1491 | 0.0229 | 0.0014 | 21.37 |
| rs12152184 | A | G | 0.0965 | 0.0208 | 3.49E-06 |  | 0.1241 | 0.0121 | 0.0017 | 21.52 |
| rs138897138 | A | G | 0.1040 | 0.0218 | 1.84E-06 |  | -0.0775 | 0.0138 | 0.0016 | 22.76 |
| rs144373891 | T | C | -0.5739 | 0.0515 | 7.69E-29 |  | 0.0027 | 0.0406 | 0.0084 | 124.16 |
| rs147383134 | T | C | 0.2573 | 0.0551 | 3.02E-06 |  | -0.1672 | 0.0488 | 0.0016 | 21.80 |
| rs60459634 | A | G | -0.1063 | 0.0229 | 3.45E-06 |  | 0.0311 | 0.0135 | 0.0015 | 21.54 |
| rs72883370 | A | G | -0.3428 | 0.0737 | 3.30E-06 |  | 0.1762 | 0.0319 | 0.0017 | 21.63 |
| rs77381020 | T | C | 0.0862 | 0.0184 | 2.80E-06 |  | 0.0193 | 0.0105 | 0.0015 | 21.94 |
| **SLAMF1** |  |  |  |  |  |  |  |  |  |  |
| rs10499604 | T | C | 0.0580 | 0.0125 | 3.48E-06 |  | 0.0236 | 0.0083 | 0.0015 | 21.53 |
| rs111865527 | T | C | 0.2712 | 0.0569 | 1.88E-06 |  | -0.0280 | 0.0319 | 0.0016 | 22.71 |
| rs112742549 | T | C | 0.2421 | 0.0506 | 1.71E-06 |  | 0.2804 | 0.0432 | 0.0017 | 22.89 |
| rs12058421 | A | C | -0.1256 | 0.0159 | 2.80E-15 |  | -0.0330 | 0.0104 | 0.0042 | 62.39 |
| rs13014154 | A | G | -0.0612 | 0.0123 | 6.50E-07 |  | 0.0496 | 0.0080 | 0.0017 | 24.75 |
| rs13147502 | A | G | -0.0609 | 0.0127 | 1.62E-06 |  | 0.1263 | 0.0077 | 0.0018 | 22.99 |
| rs138657007 | A | G | -0.2863 | 0.0577 | 6.98E-07 |  | 0.1201 | 0.0429 | 0.0019 | 24.62 |
| rs147616029 | T | C | -0.0644 | 0.0128 | 4.87E-07 |  | 0.0802 | 0.0080 | 0.0020 | 25.31 |
| rs149092077 | A | G | -0.3592 | 0.0730 | 8.63E-07 |  | -0.1744 | 0.0654 | 0.0022 | 24.21 |
| rs1609310 | T | G | -0.0557 | 0.0120 | 3.46E-06 |  | -0.0864 | 0.0080 | 0.0015 | 21.54 |
| rs192245879 | A | G | 0.3328 | 0.0655 | 3.76E-07 |  | 0.0165 | 0.0587 | 0.0019 | 25.81 |
| rs2623960 | T | C | 0.0688 | 0.0143 | 1.50E-06 |  | 0.1755 | 0.0090 | 0.0016 | 23.14 |
| rs2790462 | T | C | -0.0747 | 0.0126 | 3.06E-09 |  | 0.0242 | 0.0092 | 0.0024 | 35.14 |
| rs3184504 | T | C | 0.0970 | 0.0130 | 8.55E-14 |  | 0.0799 | 0.0078 | 0.0047 | 55.67 |
| rs35271532 | A | G | -0.1486 | 0.0324 | 4.51E-06 |  | 0.0589 | 0.0242 | 0.0015 | 21.03 |
| rs3745163 | A | C | 0.0674 | 0.0145 | 3.35E-06 |  | 0.0146 | 0.0090 | 0.0016 | 21.60 |
| rs3806818 | A | G | 0.0707 | 0.0153 | 3.82E-06 |  | 0.1231 | 0.0097 | 0.0015 | 21.35 |
| rs56244095 | A | C | 0.1013 | 0.0156 | 8.38E-11 |  | -0.0619 | 0.0087 | 0.0029 | 42.16 |
| rs73151926 | T | C | 0.1063 | 0.0229 | 3.45E-06 |  | 0.0377 | 0.0174 | 0.0015 | 21.54 |
| rs7745783 | T | C | -0.0589 | 0.0119 | 7.44E-07 |  | -0.1402 | 0.0077 | 0.0017 | 24.49 |
| rs79348253 | A | G | -0.1585 | 0.0295 | 7.75E-08 |  | 0.1295 | 0.0160 | 0.0020 | 28.86 |
| **ST1A1** |  |  |  |  |  |  |  |  |  |  |
| rs10842189 | T | C | -0.0800 | 0.0173 | 3.76E-06 |  | 0.0230 | 0.0092 | 0.0018 | 21.38 |
| rs11074902 | A | G | 0.0695 | 0.0139 | 5.73E-07 |  | -0.2192 | 0.0079 | 0.0022 | 25.00 |
| rs117222566 | A | G | 0.2710 | 0.0581 | 3.10E-06 |  | -0.0721 | 0.0358 | 0.0021 | 21.75 |
| rs149869672 | T | C | -0.3184 | 0.0684 | 3.24E-06 |  | 0.0100 | 0.0492 | 0.0020 | 21.66 |
| rs1698742 | T | C | -0.0984 | 0.0206 | 1.78E-06 |  | 0.0091 | 0.0147 | 0.0019 | 22.81 |
| rs2712255 | A | G | 0.0702 | 0.0147 | 1.79E-06 |  | 0.0347 | 0.0079 | 0.0023 | 22.80 |
| rs2731674 | T | G | -0.0830 | 0.0152 | 4.75E-08 |  | 0.0395 | 0.0088 | 0.0025 | 29.81 |
| rs371387526 | A | C | 0.1048 | 0.0214 | 9.72E-07 |  | -0.0608 | 0.0111 | 0.0027 | 23.98 |
| rs55939507 | A | G | 0.0768 | 0.0166 | 3.72E-06 |  | -0.1518 | 0.0081 | 0.0023 | 21.40 |
| rs66530140 | T | C | -0.1678 | 0.0136 | 5.64E-35 |  | -0.0062 | 0.0078 | 0.0138 | 152.20 |
| rs703595 | T | C | -0.0715 | 0.0147 | 1.15E-06 |  | -0.1739 | 0.0080 | 0.0020 | 23.65 |
| rs72643498 | A | C | -0.1800 | 0.0376 | 1.69E-06 |  | -0.0534 | 0.0150 | 0.0019 | 22.91 |
| rs77919742 | T | C | -0.1433 | 0.0287 | 5.94E-07 |  | -0.0367 | 0.0146 | 0.0022 | 24.93 |
| rs7812322 | T | C | -0.3483 | 0.0756 | 4.08E-06 |  | 0.0273 | 0.0590 | 0.0020 | 21.22 |
| **STAMPB** |  |  |  |  |  |  |  |  |  |  |
| rs1034059 | A | G | 0.0695 | 0.0145 | 1.64E-06 |  | 0.0560 | 0.0086 | 0.0016 | 22.97 |
| rs111581172 | A | G | -0.1722 | 0.0352 | 9.98E-07 |  | 0.1985 | 0.0336 | 0.0016 | 23.93 |
| rs116198125 | T | C | -0.1484 | 0.0325 | 4.97E-06 |  | 0.1528 | 0.0229 | 0.0014 | 20.85 |
| rs12152184 | A | G | 0.0961 | 0.0208 | 3.83E-06 |  | 0.1246 | 0.0121 | 0.0017 | 21.34 |
| rs138897138 | A | G | 0.1085 | 0.0218 | 6.46E-07 |  | -0.0743 | 0.0138 | 0.0017 | 24.77 |
| rs2280441 | A | G | -0.1571 | 0.0309 | 3.69E-07 |  | 0.1336 | 0.0258 | 0.0018 | 25.85 |
| rs73327656 | A | G | 0.2350 | 0.0512 | 4.44E-06 |  | 0.1500 | 0.0445 | 0.0015 | 21.06 |
| rs75610895 | T | C | -0.1908 | 0.0394 | 1.28E-06 |  | -0.2907 | 0.0411 | 0.0016 | 23.45 |
| **TNF** |  |  |  |  |  |  |  |  |  |  |
| rs117427219 | A | G | -0.3062 | 0.0629 | 1.13E-06 |  | -0.0544 | 0.0800 | 0.0022 | 23.69 |
| rs12328100 | A | G | -0.0649 | 0.0130 | 5.97E-07 |  | -0.1138 | 0.0077 | 0.0021 | 24.92 |
| rs141295666 | T | C | 0.3405 | 0.0660 | 2.48E-07 |  | -0.1177 | 0.0480 | 0.0023 | 26.61 |
| rs148560093 | A | G | -0.2980 | 0.0646 | 3.97E-06 |  | -0.0105 | 0.0614 | 0.0021 | 21.28 |
| rs4835254 | T | C | -0.1517 | 0.0310 | 9.90E-07 |  | 0.0821 | 0.0181 | 0.0020 | 23.94 |
| rs7621032 | T | C | 0.0674 | 0.0135 | 5.96E-07 |  | 0.0975 | 0.0078 | 0.0022 | 24.92 |
| rs7806921 | T | C | -0.0606 | 0.0131 | 3.73E-06 |  | -0.1681 | 0.0078 | 0.0018 | 21.40 |
| rs867063 | T | C | 0.1175 | 0.0255 | 4.07E-06 |  | -0.0363 | 0.0134 | 0.0019 | 21.23 |
| rs9614693 | T | C | 0.0826 | 0.0177 | 3.06E-06 |  | -0.3190 | 0.0107 | 0.0018 | 21.77 |
| rs9913313 | T | C | -0.0836 | 0.0183 | 4.92E-06 |  | 0.0342 | 0.0081 | 0.0026 | 20.86 |
| **TNFB** |  |  |  |  |  |  |  |  |  |  |
| rs112317147 | T | C | -0.1441 | 0.0309 | 3.11E-06 |  | 0.0772 | 0.0133 | 0.0019 | 21.74 |
| rs113244922 | T | C | 0.2324 | 0.0499 | 3.20E-06 |  | 0.2801 | 0.0384 | 0.0021 | 21.69 |
| rs114250919 | T | C | 0.2469 | 0.0490 | 4.69E-07 |  | -0.1260 | 0.0433 | 0.0022 | 25.38 |
| rs12883833 | A | G | -0.1252 | 0.0259 | 1.34E-06 |  | -0.0240 | 0.0120 | 0.0025 | 23.36 |
| rs138471526 | T | C | -0.3418 | 0.0735 | 3.31E-06 |  | 0.2503 | 0.0797 | 0.0022 | 21.62 |
| rs139511528 | A | G | -0.2485 | 0.0521 | 1.85E-06 |  | 0.4177 | 0.0559 | 0.0022 | 22.75 |
| rs143019966 | T | C | 0.2122 | 0.0451 | 2.54E-06 |  | -0.2091 | 0.0435 | 0.0020 | 22.13 |
| rs147423408 | A | G | 0.1732 | 0.0350 | 7.48E-07 |  | 0.0700 | 0.0156 | 0.0022 | 24.48 |
| rs16852556 | T | C | 0.1514 | 0.0317 | 1.79E-06 |  | -0.3723 | 0.0282 | 0.0020 | 22.81 |
| rs192303297 | T | C | -0.3872 | 0.0842 | 4.25E-06 |  | -0.0020 | 0.1053 | 0.0027 | 21.14 |
| rs2364485 | A | C | 0.1759 | 0.0189 | 1.32E-20 |  | -0.0103 | 0.0099 | 0.0076 | 86.60 |
| rs28700215 | T | C | -0.0626 | 0.0136 | 4.17E-06 |  | 0.0783 | 0.0077 | 0.0019 | 21.18 |
| rs74363807 | T | C | 0.2496 | 0.0532 | 2.71E-06 |  | -0.0840 | 0.0377 | 0.0019 | 22.01 |
| rs76913603 | A | G | -0.1741 | 0.0379 | 4.36E-06 |  | 0.0518 | 0.0286 | 0.0018 | 21.10 |
| rs77897196 | T | C | -0.1917 | 0.0410 | 2.93E-06 |  | -0.0296 | 0.0270 | 0.0019 | 21.86 |
| **TNFRSF9** |  |  |  |  |  |  |  |  |  |  |
| rs10178845 | A | G | -0.0682 | 0.0144 | 2.18E-06 |  | 0.0036 | 0.0081 | 0.0019 | 22.43 |
| rs10744409 | A | G | 0.0640 | 0.0131 | 1.03E-06 |  | 0.0307 | 0.0078 | 0.0020 | 23.86 |
| rs11202989 | T | C | -0.0995 | 0.0212 | 2.69E-06 |  | -0.0031 | 0.0099 | 0.0019 | 22.02 |
| rs118083884 | A | G | 0.3284 | 0.0668 | 8.83E-07 |  | 0.0929 | 0.0453 | 0.0025 | 24.16 |
| rs12227836 | A | G | -0.0669 | 0.0140 | 1.77E-06 |  | -0.0762 | 0.0079 | 0.0020 | 22.83 |
| rs12874404 | A | G | -0.1402 | 0.0296 | 2.17E-06 |  | 0.1711 | 0.0211 | 0.0020 | 22.43 |
| rs140214797 | T | G | 0.2317 | 0.0504 | 4.28E-06 |  | -0.3184 | 0.0326 | 0.0018 | 21.13 |
| rs146380867 | A | G | 0.3742 | 0.0814 | 4.29E-06 |  | -0.2747 | 0.0665 | 0.0019 | 21.13 |
| rs150949259 | A | G | 0.3750 | 0.0809 | 3.56E-06 |  | 0.1154 | 0.0329 | 0.0025 | 21.48 |
| rs1776354 | A | G | -0.1301 | 0.0130 | 1.41E-23 |  | -0.0538 | 0.0077 | 0.0084 | 100.14 |
| rs1846520 | A | G | -0.1626 | 0.0313 | 2.05E-07 |  | 0.0221 | 0.0156 | 0.0023 | 26.98 |
| rs2579649 | A | C | -0.0968 | 0.0199 | 1.15E-06 |  | -0.1769 | 0.0107 | 0.0021 | 23.66 |
| rs2854008 | A | G | 0.0926 | 0.0149 | 5.14E-10 |  | -0.2342 | 0.0103 | 0.0033 | 38.62 |
| rs3184504 | T | C | 0.0681 | 0.0130 | 1.62E-07 |  | 0.1138 | 0.0078 | 0.0023 | 27.44 |
| rs4976685 | A | G | -0.0693 | 0.0139 | 6.18E-07 |  | -0.0273 | 0.0082 | 0.0021 | 24.85 |
| rs72964492 | A | C | 0.3111 | 0.0650 | 1.70E-06 |  | 0.1418 | 0.0710 | 0.0023 | 22.90 |
| rs75246422 | T | C | -0.0982 | 0.0203 | 1.32E-06 |  | -0.1371 | 0.0112 | 0.0020 | 23.40 |
| rs76428106 | T | C | -0.2714 | 0.0593 | 4.72E-06 |  | -0.3561 | 0.0359 | 0.0019 | 20.94 |
| rs7858310 | A | G | 0.0707 | 0.0152 | 3.30E-06 |  | 0.0115 | 0.0083 | 0.0019 | 21.63 |
| **TNFSF14** |  |  |  |  |  |  |  |  |  |  |
| rs10211598 | T | C | -0.0628 | 0.0137 | 4.56E-06 |  | 0.1855 | 0.0078 | 0.0018 | 21.01 |
| rs11085155 | A | G | -0.0811 | 0.0176 | 4.07E-06 |  | 0.1243 | 0.0093 | 0.0018 | 21.23 |
| rs11105725 | T | C | -0.0683 | 0.0147 | 3.38E-06 |  | 0.0489 | 0.0085 | 0.0019 | 21.58 |
| rs11569551 | A | G | 0.2584 | 0.0327 | 2.74E-15 |  | 0.0706 | 0.0168 | 0.0053 | 62.43 |
| rs115950744 | A | G | -0.2574 | 0.0506 | 3.64E-07 |  | -0.0114 | 0.0382 | 0.0023 | 25.87 |
| rs11950562 | A | C | 0.0785 | 0.0132 | 2.73E-09 |  | 0.2503 | 0.0081 | 0.0030 | 35.36 |
| rs1461044 | T | C | -0.1519 | 0.0316 | 1.53E-06 |  | 0.2501 | 0.0171 | 0.0020 | 23.10 |
| rs147119146 | A | C | -0.2421 | 0.0498 | 1.17E-06 |  | 0.0391 | 0.0216 | 0.0020 | 23.63 |
| rs184708984 | T | C | -0.6334 | 0.1109 | 1.12E-08 |  | 0.0969 | 0.1101 | 0.0047 | 32.61 |
| rs2738591 | T | C | -0.0630 | 0.0133 | 2.17E-06 |  | 0.1205 | 0.0077 | 0.0019 | 22.43 |
| rs4772260 | T | C | 0.0619 | 0.0135 | 4.54E-06 |  | 0.0048 | 0.0077 | 0.0018 | 21.02 |
| rs59801342 | A | G | 0.2290 | 0.0497 | 4.07E-06 |  | 0.0463 | 0.0292 | 0.0020 | 21.23 |
| rs74600570 | T | C | -0.2255 | 0.0472 | 1.77E-06 |  | 0.1579 | 0.0209 | 0.0019 | 22.82 |
| rs7688836 | A | G | -0.0818 | 0.0166 | 8.32E-07 |  | -0.0455 | 0.0094 | 0.0021 | 24.28 |
| rs78336300 | A | C | 0.2392 | 0.0522 | 4.60E-06 |  | -0.0593 | 0.0497 | 0.0019 | 20.99 |
| rs79233212 | A | G | -0.2358 | 0.0506 | 3.16E-06 |  | -0.1263 | 0.0297 | 0.0019 | 21.71 |
| rs79791117 | T | C | -0.2336 | 0.0511 | 4.84E-06 |  | 0.0086 | 0.0378 | 0.0019 | 20.89 |
| rs9295562 | T | C | -0.0651 | 0.0141 | 3.89E-06 |  | 0.2568 | 0.0084 | 0.0018 | 21.31 |
| rs9962377 | T | C | -0.0905 | 0.0186 | 1.14E-06 |  | 0.0479 | 0.0135 | 0.0020 | 23.67 |
| **TRAIL** |  |  |  |  |  |  |  |  |  |  |
| rs1065657 | A | G | 0.0655 | 0.0118 | 2.84E-08 |  | 0.0542 | 0.0078 | 0.0022 | 30.81 |
| rs111257277 | A | G | 0.1890 | 0.0370 | 3.25E-07 |  | -0.0845 | 0.0234 | 0.0018 | 26.09 |
| rs114597610 | T | C | -0.2600 | 0.0564 | 4.03E-06 |  | -0.1343 | 0.0361 | 0.0014 | 21.25 |
| rs140862652 | A | C | 0.1342 | 0.0265 | 4.10E-07 |  | -0.1409 | 0.0113 | 0.0018 | 25.64 |
| rs141011299 | A | G | -0.5024 | 0.1076 | 3.02E-06 |  | -0.3129 | 0.1055 | 0.0022 | 21.80 |
| rs145386370 | T | G | 0.2641 | 0.0535 | 7.96E-07 |  | -0.0507 | 0.0286 | 0.0018 | 24.36 |
| rs146922303 | T | C | 0.1622 | 0.0347 | 2.95E-06 |  | -0.1083 | 0.0218 | 0.0015 | 21.85 |
| rs16840522 | T | C | -0.1191 | 0.0147 | 5.40E-16 |  | -0.2638 | 0.0115 | 0.0044 | 65.63 |
| rs174533 | A | G | 0.0787 | 0.0121 | 7.81E-11 |  | 0.1168 | 0.0078 | 0.0029 | 42.30 |
| rs17779404 | T | G | 0.0674 | 0.0138 | 1.04E-06 |  | 0.1854 | 0.0096 | 0.0016 | 23.85 |
| rs180941492 | A | G | -0.2440 | 0.0491 | 6.71E-07 |  | -0.1204 | 0.0414 | 0.0018 | 24.69 |
| rs2113173 | T | C | 0.0691 | 0.0145 | 1.88E-06 |  | -0.1046 | 0.0089 | 0.0016 | 22.71 |
| rs2138380 | A | G | 0.0882 | 0.0182 | 1.26E-06 |  | 0.1643 | 0.0101 | 0.0018 | 23.48 |
| rs2418781 | T | G | -0.1452 | 0.0316 | 4.33E-06 |  | -0.0863 | 0.0205 | 0.0015 | 21.11 |
| rs28929474 | T | C | 0.6692 | 0.0440 | 3.08E-52 |  | -0.0592 | 0.0275 | 0.0155 | 231.29 |
| rs4760 | A | G | 0.3554 | 0.0163 | 2.14E-105 |  | -0.0526 | 0.0104 | 0.0322 | 475.33 |
| rs490342 | T | G | 0.1252 | 0.0200 | 3.85E-10 |  | 0.2207 | 0.0163 | 0.0030 | 39.18 |
| rs5030044 | A | G | 0.2850 | 0.0187 | 1.90E-52 |  | -0.0261 | 0.0113 | 0.0160 | 232.24 |
| rs6969337 | T | C | 0.1823 | 0.0380 | 1.61E-06 |  | 0.0063 | 0.0166 | 0.0020 | 23.01 |
| rs77303550 | T | C | -0.0724 | 0.0146 | 7.09E-07 |  | 0.1133 | 0.0098 | 0.0017 | 24.59 |
| rs8178824 | T | C | 0.2575 | 0.0370 | 3.42E-12 |  | -0.3706 | 0.0390 | 0.0033 | 48.43 |
| **TRANCE** |  |  |  |  |  |  |  |  |  |  |
| rs113835939 | A | C | -0.1939 | 0.0416 | 3.15E-06 |  | -0.0348 | 0.0192 | 0.0015 | 21.72 |
| rs117113213 | A | G | -0.1646 | 0.0300 | 4.10E-08 |  | -0.0551 | 0.0156 | 0.0020 | 30.10 |
| rs11713634 | A | G | -0.0978 | 0.0150 | 7.03E-11 |  | -0.2106 | 0.0081 | 0.0037 | 42.50 |
| rs1432791 | T | C | -0.0549 | 0.0118 | 3.28E-06 |  | -0.0001 | 0.0077 | 0.0015 | 21.64 |
| rs150128402 | A | G | 0.2386 | 0.0459 | 2.01E-07 |  | -0.1348 | 0.0248 | 0.0018 | 27.02 |
| rs17302 | T | G | -0.0625 | 0.0130 | 1.53E-06 |  | -0.0259 | 0.0093 | 0.0016 | 23.11 |
| rs2468187 | T | C | -0.1618 | 0.0118 | 8.62E-43 |  | -0.0017 | 0.0084 | 0.0126 | 187.99 |
| rs2975421 | T | G | -0.0780 | 0.0170 | 4.47E-06 |  | -0.0442 | 0.0107 | 0.0015 | 21.05 |
| rs34221978 | A | G | 0.1670 | 0.0344 | 1.21E-06 |  | -0.0128 | 0.0169 | 0.0016 | 23.56 |
| rs3801000 | A | G | 0.0686 | 0.0130 | 1.31E-07 |  | -0.1688 | 0.0078 | 0.0019 | 27.84 |
| rs4334157 | T | C | -0.1684 | 0.0356 | 2.24E-06 |  | -0.0410 | 0.0339 | 0.0015 | 22.37 |
| rs4365726 | A | G | -0.0777 | 0.0166 | 2.86E-06 |  | 0.3029 | 0.0101 | 0.0015 | 21.91 |
| rs4512994 | A | C | 0.1172 | 0.0116 | 5.33E-24 |  | 0.0205 | 0.0079 | 0.0069 | 102.07 |
| rs6063153 | T | C | 0.0636 | 0.0126 | 4.47E-07 |  | -0.4049 | 0.0081 | 0.0018 | 25.47 |
| rs62501135 | A | G | -0.1532 | 0.0148 | 4.13E-25 |  | -0.0284 | 0.0101 | 0.0074 | 107.14 |
| rs6479556 | T | G | 0.0700 | 0.0148 | 2.25E-06 |  | -0.1147 | 0.0096 | 0.0015 | 22.37 |
| rs6932751 | A | G | 0.0540 | 0.0116 | 3.24E-06 |  | -0.0964 | 0.0077 | 0.0015 | 21.67 |
| rs704 | A | G | -0.1085 | 0.0116 | 8.48E-21 |  | -0.0013 | 0.0078 | 0.0059 | 87.48 |
| rs72781813 | T | G | 0.2368 | 0.0486 | 1.10E-06 |  | 0.0393 | 0.0291 | 0.0016 | 23.74 |
| rs75991751 | T | G | -0.2685 | 0.0539 | 6.31E-07 |  | -0.0571 | 0.0508 | 0.0018 | 24.81 |
| rs76488966 | T | G | -0.1719 | 0.0366 | 2.64E-06 |  | 0.1165 | 0.0182 | 0.0015 | 22.06 |
| rs77980965 | T | C | -0.2976 | 0.0641 | 3.44E-06 |  | 0.1074 | 0.0380 | 0.0019 | 21.55 |
| **TSLP** |  |  |  |  |  |  |  |  |  |  |
| rs117095006 | A | G | -0.1569 | 0.0338 | 3.45E-06 |  | -0.0291 | 0.0219 | 0.0019 | 21.54 |
| rs140886020 | A | G | 0.1619 | 0.0351 | 3.98E-06 |  | 0.0434 | 0.0220 | 0.0018 | 21.27 |
| rs145111430 | A | G | 0.2674 | 0.0575 | 3.31E-06 |  | -0.2419 | 0.0450 | 0.0019 | 21.62 |
| rs185922111 | A | G | 0.3618 | 0.0747 | 1.28E-06 |  | -0.2027 | 0.0447 | 0.0022 | 23.45 |
| rs190906347 | A | C | 0.3219 | 0.0660 | 1.08E-06 |  | 0.0433 | 0.0607 | 0.0022 | 23.78 |
| rs4724126 | T | G | 0.0846 | 0.0152 | 2.61E-08 |  | -0.0899 | 0.0084 | 0.0027 | 30.97 |
| rs7406537 | A | G | -0.0643 | 0.0139 | 3.73E-06 |  | -0.0203 | 0.0078 | 0.0019 | 21.40 |
| **TWEAK** |  |  |  |  |  |  |  |  |  |  |
| rs10831650 | A | G | 0.0692 | 0.0125 | 3.09E-08 |  | -0.1033 | 0.0085 | 0.0021 | 30.64 |
| rs11738159 | T | C | 0.0577 | 0.0119 | 1.24E-06 |  | -0.1505 | 0.0078 | 0.0016 | 23.51 |
| rs12726054 | A | G | 0.1090 | 0.0228 | 1.75E-06 |  | 0.1622 | 0.0118 | 0.0016 | 22.85 |
| rs13107325 | T | C | 0.2027 | 0.0236 | 8.77E-18 |  | 0.2432 | 0.0324 | 0.0050 | 73.76 |
| rs16879825 | A | G | -0.2027 | 0.0438 | 3.69E-06 |  | -0.0148 | 0.0155 | 0.0018 | 21.41 |
| rs1965399 | A | G | -0.1312 | 0.0280 | 2.79E-06 |  | -0.2967 | 0.0239 | 0.0015 | 21.95 |
| rs2163333 | A | G | 0.1404 | 0.0273 | 2.71E-07 |  | -0.3269 | 0.0195 | 0.0018 | 26.45 |
| rs34790908 | T | C | 0.2110 | 0.0129 | 3.90E-60 |  | -0.0717 | 0.0090 | 0.0178 | 267.50 |
| rs3821473 | A | G | -0.0622 | 0.0136 | 4.80E-06 |  | -0.2077 | 0.0088 | 0.0014 | 20.91 |
| rs4882710 | T | C | 0.0666 | 0.0131 | 3.70E-07 |  | -0.0055 | 0.0078 | 0.0018 | 25.84 |
| rs56023600 | T | C | -0.0856 | 0.0186 | 4.18E-06 |  | 0.0859 | 0.0107 | 0.0015 | 21.18 |
| rs579459 | T | C | 0.1098 | 0.0157 | 2.68E-12 |  | -0.0472 | 0.0092 | 0.0041 | 48.90 |
| rs7019909 | T | C | -0.0897 | 0.0193 | 3.36E-06 |  | -0.1897 | 0.0118 | 0.0015 | 21.60 |
| rs73590361 | T | C | -0.0744 | 0.0161 | 3.82E-06 |  | -0.1782 | 0.0109 | 0.0014 | 21.35 |
| rs7503751 | A | G | -0.1386 | 0.0238 | 5.76E-09 |  | -0.0249 | 0.0178 | 0.0024 | 33.91 |
| rs76047473 | T | C | 0.1318 | 0.0286 | 4.06E-06 |  | -0.2028 | 0.0185 | 0.0014 | 21.23 |
| rs76133364 | A | C | 0.1896 | 0.0369 | 2.77E-07 |  | 0.1069 | 0.0179 | 0.0020 | 26.40 |
| rs78254232 | T | C | -0.2108 | 0.0456 | 3.79E-06 |  | -0.5988 | 0.0448 | 0.0015 | 21.37 |
| **uPA** |  |  |  |  |  |  |  |  |  |  |
| rs1074669 | A | G | -0.0548 | 0.0119 | 4.12E-06 |  | -0.1824 | 0.0077 | 0.0015 | 21.20 |
| rs10840566 | A | G | 0.0784 | 0.0154 | 3.56E-07 |  | -0.1059 | 0.0117 | 0.0018 | 25.91 |
| rs10992204 | A | G | 0.1061 | 0.0217 | 1.01E-06 |  | 0.1157 | 0.0114 | 0.0017 | 23.90 |
| rs11220462 | A | G | -0.1024 | 0.0161 | 2.01E-10 |  | -0.0502 | 0.0098 | 0.0027 | 40.45 |
| rs154972 | A | G | -0.0625 | 0.0120 | 1.91E-07 |  | 0.0525 | 0.0088 | 0.0018 | 27.12 |
| rs333947 | A | G | -0.0785 | 0.0166 | 2.26E-06 |  | -0.0101 | 0.0103 | 0.0016 | 22.36 |
| rs3933086 | A | G | 0.3099 | 0.0664 | 3.05E-06 |  | 0.0773 | 0.0244 | 0.0018 | 21.78 |
| rs4251805 | T | C | -0.4220 | 0.0311 | 6.10E-42 |  | -0.0371 | 0.0205 | 0.0123 | 184.10 |
| rs4760 | A | G | 0.1408 | 0.0165 | 1.42E-17 |  | -0.1327 | 0.0104 | 0.0051 | 72.81 |
| rs4800787 | T | C | -0.0940 | 0.0125 | 5.48E-14 |  | 0.0155 | 0.0079 | 0.0038 | 56.54 |
| rs59772299 | T | G | 0.0627 | 0.0133 | 2.43E-06 |  | -0.0470 | 0.0095 | 0.0015 | 22.22 |
| rs597808 | A | G | 0.0662 | 0.0134 | 7.80E-07 |  | 0.1109 | 0.0078 | 0.0021 | 24.40 |
| rs62286554 | T | C | -0.0910 | 0.0190 | 1.67E-06 |  | -0.0325 | 0.0100 | 0.0020 | 22.94 |
| rs6805474 | A | G | 0.0952 | 0.0176 | 6.33E-08 |  | -0.0387 | 0.0104 | 0.0020 | 29.25 |
| rs704 | A | G | 0.0567 | 0.0115 | 8.20E-07 |  | 0.0025 | 0.0078 | 0.0016 | 24.31 |
| rs74607099 | A | G | -0.1817 | 0.0389 | 3.00E-06 |  | 0.0829 | 0.0207 | 0.0015 | 21.81 |
| rs7564243 | A | G | -0.0852 | 0.0114 | 7.80E-14 |  | -0.1622 | 0.0078 | 0.0038 | 55.85 |

**Notes:** Beta for CIPs represents change in standard deviation per 1 copy of effect allele. Log(OR) for OSA represents log(OR) change in OSA risk per 1 copy of effect allele. F > 10 suggests sufficient strength to ensure the validity of the instrumental variable.

**Abbreviations:** log(OR), log odds ratio; se, standard error; Pval, P-value.

**Supplementary Table 2** MR estimates of 91 CIPs on OSA.

|  |  |  | **Inverse variance weighted** | | | **MR Egger** | | | **Weighted median** | | | **Simple mode** | | | **Weighted mode** | | |
| --- | --- | --- | --- | --- | --- | --- | --- | --- | --- | --- | --- | --- | --- | --- | --- | --- | --- |
| **Category** | **Exposure** | **NSNP** | **OR** | **95% CI** | **Pval** | **OR** | **95% CI** | **Pval** | **OR** | **95% CI** | **Pval** | **OR** | **95% CI** | **Pval** | **OR** | **95% CI** | **Pval** |
| **Interleukins** |  |  |  |  |  |  |  |  |  |  |  |  |  |  |  |  |  |
|  | IL-1 alpha | 8 | 1.064 | (0.976-1.159) | 0.1609 | 1.144 | (0.916-1.430) | 0.2807 | 1.035 | (0.921-1.164) | 0.5617 | 1.044 | (0.879-1.240) | 0.6368 | 1.026 | (0.897-1.173) | 0.7236 |
|  | IL-2RB | 6 | 0.922 | (0.831-1.022) | 0.1231 | 0.895 | (0.687-1.166) | 0.4577 | 0.928 | (0.818-1.053) | 0.2486 | 0.932 | (0.784-1.109) | 0.4637 | 0.928 | (0.790-1.091) | 0.4081 |
|  | IL-2 | 5 | 1.095 | (0.985-1.217) | 0.0927 | 1.066 | (0.781-1.454) | 0.7141 | 1.086 | (0.953-1.238) | 0.2160 | 1.081 | (0.917-1.275) | 0.4040 | 1.077 | (0.917-1.265) | 0.4152 |
|  | IL-4 | 7 | 1.070 | (0.977-1.171) | 0.1471 | 0.801 | (0.592-1.085) | 0.2120 | 1.062 | (0.938-1.204) | 0.3431 | 1.052 | (0.891-1.242) | 0.5738 | 1.048 | (0.894-1.228) | 0.5851 |
|  | IL-5 | 7 | 0.920 | (0.836-1.013) | 0.0908 | 0.831 | (0.615-1.121) | 0.2797 | 0.912 | (0.802-1.037) | 0.1613 | 0.908 | (0.766-1.076) | 0.3077 | 0.912 | (0.779-1.067) | 0.2932 |
|  | IL-6 | 4 | 1.039 | (0.962-1.123) | 0.3284 | 1.066 | (0.852-1.333) | 0.6329 | 1.029 | (0.945-1.120) | 0.5073 | 1.032 | (0.940-1.133) | 0.5544 | 1.029 | (0.942-1.123) | 0.5694 |
|  | IL-7 | 9 | 1.060 | (0.973-1.155) | 0.1825 | 0.962 | (0.746-1.240) | 0.7718 | 1.031 | (0.922-1.153) | 0.5919 | 1.012 | (0.844-1.214) | 0.9009 | 1.016 | (0.872-1.183) | 0.8482 |
|  | IL-8 | 16 | 0.941 | (0.883-1.002) | 0.0556 | 0.900 | (0.797-1.016) | 0.1094 | 0.926 | (0.844-1.015) | 0.0991 | 0.896 | (0.772-1.039) | 0.1659 | 0.921 | (0.824-1.030) | 0.1702 |
|  | IL-10RA | 10 | 1.029 | (0.972-1.090) | 0.3278 | 1.047 | (0.953-1.150) | 0.3692 | 1.047 | (0.972-1.127) | 0.2286 | 1.078 | (0.963-1.207) | 0.2233 | 1.052 | (0.969-1.142) | 0.2568 |
|  | IL-10RB | 15 | 0.990 | (0.960-1.022) | 0.5421 | 1.026 | (0.980-1.074) | 0.2975 | 0.991 | (0.957-1.027) | 0.6261 | 0.970 | (0.874-1.076) | 0.5690 | 0.992 | (0.960-1.026) | 0.6464 |
|  | IL-10 | 12 | 1.058 | (0.995-1.126) | 0.0710 | 0.940 | (0.814-1.085) | 0.4173 | 1.073 | (0.985-1.169) | 0.1067 | 1.055 | (0.910-1.223) | 0.4908 | 1.068 | (0.961-1.188) | 0.2490 |
|  | IL-12B | 20 | 1.042 | (0.995-1.091) | 0.0825 | 1.174 | (1.037-1.329) | 0.0212 | 1.058 | (0.990-1.131) | 0.0944 | 1.074 | (0.956-1.205) | 0.2440 | 1.061 | (0.974-1.156) | 0.1913 |
|  | IL-13 | 10 | 0.979 | (0.919-1.044) | 0.5233 | 0.943 | (0.783-1.135) | 0.5535 | 0.950 | (0.869-1.040) | 0.2658 | 0.898 | (0.787-1.025) | 0.1460 | 0.931 | (0.822-1.055) | 0.2909 |
|  | IL-15RA | 6 | 1.045 | (0.957-1.142) | 0.3251 | 0.967 | (0.797-1.174) | 0.7538 | 1.026 | (0.922-1.142) | 0.6349 | 1.014 | (0.879-1.171) | 0.8526 | 1.012 | (0.873-1.174) | 0.8777 |
|  | IL-17A | 9 | 1.040 | (0.963-1.122) | 0.3170 | 1.023 | (0.849-1.233) | 0.8178 | 1.014 | (0.917-1.121) | 0.7892 | 0.988 | (0.839-1.163) | 0.8863 | 0.991 | (0.858-1.144) | 0.9029 |
|  | IL-17C | 8 | 1.090 | (1.008-1.178) | 0.0311 | 1.308 | (0.952-1.798) | 0.1486 | 1.073 | (0.967-1.191) | 0.1839 | 1.040 | (0.898-1.205) | 0.6167 | 1.063 | (0.947-1.193) | 0.3373 |
|  | IL-18R1 | 16 | 1.037 | (0.973-1.106) | 0.2648 | 0.983 | (0.856-1.130) | 0.8160 | 1.051 | (0.960-1.151) | 0.2835 | 1.106 | (0.931-1.316) | 0.2699 | 1.062 | (0.933-1.208) | 0.3788 |
|  | IL-18 | 12 | 0.990 | (0.938-1.045) | 0.7184 | 1.047 | (0.930-1.179) | 0.4649 | 1.006 | (0.936-1.082) | 0.8624 | 1.005 | (0.905-1.117) | 0.9218 | 1.009 | (0.939-1.085) | 0.8064 |
|  | IL-20RA | 4 | 0.877 | (0.793-0.970) | 0.0107 | 0.804 | (0.684-0.944) | 0.1173 | 0.873 | (0.758-1.005) | 0.0581 | 0.977 | (0.777-1.227) | 0.8520 | 0.825 | (0.712-0.955) | 0.0821 |
|  | IL-20 | 11 | 0.961 | (0.894-1.033) | 0.2779 | 1.094 | (0.938-1.276) | 0.2833 | 1.016 | (0.921-1.121) | 0.7566 | 1.016 | (0.882-1.171) | 0.8289 | 1.016 | (0.891-1.159) | 0.8150 |
|  | IL-22RA1 | 8 | 1.057 | (0.958-1.165) | 0.2704 | 1.053 | (0.867-1.280) | 0.6190 | 1.058 | (0.936-1.196) | 0.3652 | 1.069 | (0.920-1.243) | 0.4126 | 1.040 | (0.901-1.200) | 0.6114 |
|  | IL-24 | 5 | 1.040 | (0.910-1.189) | 0.5671 | 0.898 | (0.593-1.360) | 0.6469 | 1.043 | (0.890-1.223) | 0.6012 | 1.069 | (0.892-1.282) | 0.5082 | 1.032 | (0.864-1.233) | 0.7468 |
|  | IL-33 | 5 | 0.949 | (0.862-1.045) | 0.2882 | 0.909 | (0.739-1.117) | 0.4301 | 0.956 | (0.851-1.073) | 0.4451 | 0.973 | (0.839-1.129) | 0.7385 | 0.971 | (0.843-1.119) | 0.7059 |
| **Chemokines** |  |  |  |  |  |  |  |  |  |  |  |  |  |  |  |  |  |
|  | CXCL1 | 7 | 1.044 | (0.992-1.098) | 0.1007 | 1.056 | (0.974-1.145) | 0.2428 | 1.048 | (0.993-1.107) | 0.0901 | 1.053 | (0.942-1.176) | 0.3972 | 1.049 | (0.994-1.106) | 0.1304 |
|  | CXCL5 | 11 | 0.977 | (0.940-1.015) | 0.2328 | 1.010 | (0.955-1.068) | 0.7359 | 0.985 | (0.944-1.029) | 0.5009 | 0.983 | (0.904-1.069) | 0.6995 | 0.986 | (0.942-1.031) | 0.5436 |
|  | CXCL6 | 6 | 0.935 | (0.847-1.033) | 0.1867 | 0.911 | (0.679-1.221) | 0.5658 | 0.940 | (0.832-1.062) | 0.3227 | 0.971 | (0.834-1.131) | 0.7218 | 0.943 | (0.819-1.087) | 0.4559 |
|  | CXCL9 | 13 | 0.957 | (0.894-1.025) | 0.2112 | 0.950 | (0.831-1.086) | 0.4706 | 0.989 | (0.906-1.079) | 0.7993 | 0.991 | (0.869-1.129) | 0.8899 | 0.991 | (0.888-1.105) | 0.8684 |
|  | CXCL10 | 20 | 1.041 | (0.992-1.092) | 0.1026 | 0.986 | (0.904-1.076) | 0.7546 | 1.041 | (0.972-1.116) | 0.2486 | 1.064 | (0.945-1.199) | 0.3163 | 1.037 | (0.951-1.131) | 0.4164 |
|  | CXCL11 | 20 | 1.017 | (0.963-1.075) | 0.5408 | 1.044 | (0.871-1.252) | 0.6485 | 1.055 | (0.976-1.141) | 0.1740 | 1.005 | (0.896-1.127) | 0.9366 | 1.046 | (0.945-1.158) | 0.3936 |
|  | CCL2 | 18 | 1.020 | (0.983-1.058) | 0.2955 | 1.015 | (0.955-1.080) | 0.6299 | 1.006 | (0.955-1.060) | 0.8170 | 0.988 | (0.910-1.073) | 0.7787 | 0.994 | (0.938-1.053) | 0.8469 |
|  | CCL4 | 7 | 0.938 | (0.860-1.022) | 0.1426 | 0.957 | (0.805-1.139) | 0.6443 | 0.958 | (0.862-1.065) | 0.4274 | 0.953 | (0.827-1.098) | 0.5304 | 0.954 | (0.840-1.084) | 0.4990 |
|  | CCL7 | 15 | 1.026 | (0.977-1.078) | 0.3095 | 0.997 | (0.873-1.138) | 0.9674 | 1.015 | (0.945-1.091) | 0.6844 | 0.975 | (0.870-1.092) | 0.6677 | 1.000 | (0.921-1.085) | 0.9983 |
|  | CCL8 | 24 | 0.990 | (0.967-1.013) | 0.3860 | 0.979 | (0.950-1.009) | 0.1808 | 0.976 | (0.948-1.005) | 0.1006 | 1.029 | (0.974-1.087) | 0.3156 | 0.981 | (0.952-1.011) | 0.2190 |
|  | CCL11 | 16 | 1.036 | (0.985-1.090) | 0.1716 | 1.014 | (0.921-1.117) | 0.7797 | 1.026 | (0.956-1.101) | 0.4781 | 1.056 | (0.943-1.183) | 0.3631 | 1.028 | (0.958-1.103) | 0.4535 |
|  | CCL13 | 18 | 1.011 | (0.975-1.048) | 0.5623 | 0.978 | (0.889-1.076) | 0.6575 | 1.015 | (0.963-1.069) | 0.5808 | 1.020 | (0.936-1.112) | 0.6522 | 1.009 | (0.955-1.066) | 0.7495 |
|  | CCL19 | 11 | 0.933 | (0.879-0.991) | 0.0237 | 0.890 | (0.791-1.001) | 0.0846 | 0.915 | (0.846-0.988) | 0.0237 | 0.902 | (0.788-1.031) | 0.1623 | 0.902 | (0.822-0.988) | 0.0516 |
|  | CCL20 | 13 | 1.064 | (0.989-1.144) | 0.0947 | 1.023 | (0.845-1.238) | 0.8208 | 1.065 | (0.967-1.172) | 0.2029 | 1.080 | (0.921-1.266) | 0.3633 | 1.029 | (0.895-1.183) | 0.6971 |
|  | CCL23 | 17 | 0.946 | (0.892-1.003) | 0.0616 | 0.972 | (0.857-1.103) | 0.6701 | 0.983 | (0.904-1.07) | 0.6984 | 1.030 | (0.895-1.186) | 0.6851 | 1.007 | (0.895-1.132) | 0.9123 |
|  | CCL25 | 12 | 1.079 | (1.000-1.164) | 0.0493 | 1.125 | (0.894-1.415) | 0.3380 | 1.076 | (0.977-1.184) | 0.1389 | 1.075 | (0.926-1.247) | 0.3629 | 1.076 | (0.930-1.246) | 0.3460 |
|  | CCL28 | 18 | 1.035 | (0.972-1.102) | 0.2795 | 0.975 | (0.824-1.154) | 0.7750 | 1.044 | (0.940-1.158) | 0.4218 | 0.894 | (0.730-1.094) | 0.2910 | 0.902 | (0.728-1.116) | 0.3549 |
|  | CX3CL1 | 18 | 1.019 | (0.961-1.080) | 0.5276 | 1.020 | (0.863-1.205) | 0.8190 | 1.029 | (0.951-1.113) | 0.4797 | 1.029 | (0.905-1.171) | 0.6650 | 1.020 | (0.916-1.136) | 0.7189 |
|  | MIP-1 alpha | 8 | 0.906 | (0.846-0.969) | 0.0042 | 0.826 | (0.690-0.989) | 0.0822 | 0.880 | (0.808-0.959) | 0.0035 | 0.870 | (0.741-1.022) | 0.1335 | 0.878 | (0.792-0.973) | 0.0415 |
| **Growth factors** |  |  |  |  |  |  |  |  |  |  |  |  |  |  |  |  |  |
|  | Beta-NGF | 19 | 0.959 | (0.901-1.022) | 0.1948 | 0.898 | (0.747-1.078) | 0.2648 | 0.953 | (0.873-1.039) | 0.2754 | 0.971 | (0.838-1.125) | 0.6994 | 0.942 | (0.837-1.059) | 0.3306 |
|  | DNER | 11 | 0.961 | (0.899-1.027) | 0.2432 | 1.051 | (0.846-1.305) | 0.6636 | 0.954 | (0.87-1.046) | 0.3146 | 0.960 | (0.828-1.115) | 0.6074 | 0.963 | (0.862-1.076) | 0.5157 |
|  | FGF-5 | 21 | 1.090 | (1.041-1.142) | 0.0003 | 1.128 | (1.044-1.220) | 0.0068 | 1.084 | (1.013-1.160) | 0.0203 | 1.023 | (0.908-1.153) | 0.7090 | 1.112 | (1.020-1.212) | 0.0255 |
|  | FGF-19 | 12 | 0.975 | (0.921-1.032) | 0.3807 | 0.969 | (0.858-1.095) | 0.6287 | 0.957 | (0.885-1.035) | 0.2694 | 0.994 | (0.877-1.126) | 0.9268 | 0.956 | (0.883-1.034) | 0.2829 |
|  | FGF-21 | 12 | 0.957 | (0.900-1.0180) | 0.1610 | 0.923 | (0.791-1.077) | 0.3312 | 0.977 | (0.900-1.061) | 0.5827 | 1.014 | (0.895-1.149) | 0.8329 | 0.984 | (0.902-1.074) | 0.7305 |
|  | FGF-23 | 6 | 0.954 | (0.860-1.059) | 0.3797 | 1.145 | (0.793-1.654) | 0.5098 | 0.937 | (0.825-1.063) | 0.3112 | 0.929 | (0.786-1.099) | 0.4319 | 0.931 | (0.781-1.110) | 0.4603 |
|  | HGF | 13 | 0.966 | (0.895-1.042) | 0.3656 | 1.024 | (0.876-1.197) | 0.7706 | 0.971 | (0.878-1.073) | 0.5602 | 0.970 | (0.848-1.110) | 0.6642 | 0.960 | (0.849-1.086) | 0.5294 |
|  | LAP TGF-beta-1 | 18 | 1.037 | (0.985-1.090) | 0.1646 | 1.054 | (0.967-1.150) | 0.2510 | 1.007 | (0.939-1.080) | 0.8365 | 1.043 | (0.925-1.177) | 0.4978 | 1.022 | (0.944-1.106) | 0.5955 |
|  | TGF-alpha | 6 | 1.044 | (0.957-1.139) | 0.3314 | 0.951 | (0.795-1.136) | 0.6070 | 0.994 | (0.893-1.107) | 0.9178 | 0.987 | (0.856-1.138) | 0.8600 | 0.990 | (0.870-1.127) | 0.8879 |
|  | VEGF_A | 15 | 1.025 | (0.989-1.062) | 0.1736 | 1.024 | (0.967-1.085) | 0.4279 | 1.027 | (0.986-1.069) | 0.2026 | 0.997 | (0.898-1.106) | 0.9499 | 1.025 | (0.982-1.069) | 0.2790 |
|  | SCF | 29 | 1.008 | (0.975-1.043) | 0.6274 | 1.009 | (0.947-1.075) | 0.7826 | 1.013 | (0.961-1.068) | 0.6240 | 1.029 | (0.938-1.130) | 0.5512 | 1.012 | (0.961-1.065) | 0.6594 |
|  | ARTN | 11 | 1.062 | (0.990-1.140) | 0.0925 | 1.041 | (0.884-1.226) | 0.6411 | 1.048 | (0.961-1.142) | 0.2923 | 1.027 | (0.905-1.167) | 0.6859 | 1.025 | (0.894-1.176) | 0.7272 |
|  | CSF-1 | 10 | 1.044 | (0.961-1.134) | 0.3091 | 1.157 | (0.854-1.568) | 0.3740 | 1.042 | (0.936-1.160) | 0.4488 | 1.083 | (0.920-1.276) | 0.3629 | 1.053 | (0.894-1.240) | 0.5513 |
|  | Flt3L | 25 | 0.941 | (0.905-0.978) | 0.0019 | 0.913 | (0.846-0.985) | 0.0282 | 0.918 | (0.868-0.971) | 0.0028 | 0.955 | (0.859-1.063) | 0.4106 | 0.924 | (0.876-0.974) | 0.0072 |
|  | hGDNF | 9 | 0.980 | (0.924-1.039) | 0.4919 | 0.932 | (0.838-1.037) | 0.2368 | 0.973 | (0.908-1.042) | 0.4375 | 0.883 | (0.750-1.041) | 0.1764 | 0.968 | (0.901-1.041) | 0.4101 |
|  | LIF | 7 | 0.931 | (0.856-1.013) | 0.0974 | 0.882 | (0.653-1.189) | 0.4469 | 0.923 | (0.820-1.038) | 0.1826 | 0.896 | (0.747-1.073) | 0.2778 | 0.916 | (0.798-1.053) | 0.2637 |
|  | LIF-R | 11 | 1.032 | (0.966-1.103) | 0.3543 | 1.029 | (0.840-1.260) | 0.7864 | 1.005 | (0.913-1.106) | 0.9231 | 1.012 | (0.877-1.168) | 0.8736 | 0.984 | (0.866-1.117) | 0.8060 |
|  | NRTN | 9 | 1.025 | (0.950-1.106) | 0.5254 | 0.928 | (0.742-1.160) | 0.5327 | 0.973 | (0.875-1.082) | 0.6143 | 0.981 | (0.840-1.146) | 0.8154 | 0.963 | (0.862-1.077) | 0.5283 |
|  | NT-3 | 13 | 1.055 | (0.983-1.131) | 0.1367 | 1.038 | (0.892-1.208) | 0.6427 | 1.024 | (0.932-1.125) | 0.6254 | 1.012 | (0.859-1.193) | 0.8864 | 1.012 | (0.877-1.168) | 0.8700 |
| **Others** |  |  |  |  |  |  |  |  |  |  |  |  |  |  |  |  |  |
|  | 4EBP1 | 8 | 1.016 | (0.946-1.091) | 0.6675 | 1.071 | (0.905-1.268) | 0.4533 | 1.015 | (0.926-1.112) | 0.7513 | 1.042 | (0.905-1.201) | 0.5838 | 1.012 | (0.907-1.129) | 0.8356 |
|  | ADA | 9 | 1.030 | (0.948-1.119) | 0.4868 | 0.888 | (0.740-1.066) | 0.2439 | 1.034 | (0.918-1.165) | 0.5824 | 1.066 | (0.868-1.310) | 0.5585 | 1.022 | (0.838-1.248) | 0.8327 |
|  | AXIN1 | 8 | 0.976 | (0.897-1.061) | 0.5630 | 1.016 | (0.830-1.244) | 0.8830 | 0.968 | (0.869-1.077) | 0.5510 | 0.926 | (0.793-1.082) | 0.3649 | 0.925 | (0.789-1.085) | 0.3706 |
|  | CASP-8 | 8 | 1.046 | (0.968-1.131) | 0.2566 | 1.022 | (0.902-1.159) | 0.7426 | 1.037 | (0.939-1.147) | 0.4711 | 1.015 | (0.875-1.178) | 0.8480 | 1.004 | (0.891-1.130) | 0.9529 |
|  | CD5 | 16 | 1.055 | (1.001-1.113) | 0.0477 | 1.036 | (0.903-1.189) | 0.6215 | 1.043 | (0.967-1.126) | 0.2760 | 0.988 | (0.885-1.102) | 0.8267 | 1.016 | (0.934-1.105) | 0.7208 |
|  | CD6 | 8 | 1.057 | (0.974-1.148) | 0.1827 | 0.951 | (0.732-1.236) | 0.7202 | 1.055 | (0.951-1.170) | 0.3140 | 1.033 | (0.895-1.192) | 0.6729 | 1.050 | (0.935-1.180) | 0.4341 |
|  | CD40 | 12 | 1.024 | (0.958-1.095) | 0.4897 | 1.043 | (0.904-1.203) | 0.5773 | 1.014 | (0.924-1.114) | 0.7637 | 1.014 | (0.874-1.176) | 0.8576 | 1.010 | (0.902-1.131) | 0.8655 |
|  | CD244 | 17 | 0.978 | (0.933-1.025) | 0.3535 | 0.926 | (0.843-1.017) | 0.1284 | 0.966 | (0.907-1.029) | 0.2802 | 0.973 | (0.870-1.089) | 0.6390 | 0.963 | (0.898-1.031) | 0.2944 |
|  | CDCP1 | 17 | 1.037 | (0.991-1.085) | 0.1179 | 1.053 | (0.962-1.153) | 0.2819 | 1.045 | (0.981-1.113) | 0.1718 | 1.043 | (0.935-1.164) | 0.4603 | 1.051 | (0.960-1.151) | 0.3008 |
|  | CST5 | 28 | 0.957 | (0.919-0.996) | 0.0320 | 0.904 | (0.832-0.982) | 0.0242 | 0.944 | (0.890-1.003) | 0.0610 | 0.885 | (0.782-1.001) | 0.0624 | 0.923 | (0.866-0.985) | 0.0223 |
|  | EN-RAGE | 13 | 1.017 | (0.958-1.080) | 0.5872 | 0.985 | (0.875-1.109) | 0.8119 | 0.996 | (0.918-1.082) | 0.9327 | 0.970 | (0.858-1.097) | 0.6384 | 0.990 | (0.900-1.088) | 0.8321 |
|  | IFN-gamma | 9 | 0.960 | (0.893-1.032) | 0.2673 | 1.016 | (0.881-1.173) | 0.8316 | 1.002 | (0.907-1.106) | 0.9697 | 1.002 | (0.867-1.159) | 0.9753 | 1.005 | (0.878-1.152) | 0.9404 |
|  | MMP-1 | 10 | 1.032 | (0.963-1.106) | 0.3739 | 1.035 | (0.885-1.210) | 0.6811 | 1.033 | (0.937-1.139) | 0.5113 | 0.961 | (0.834-1.108) | 0.6003 | 1.010 | (0.907-1.124) | 0.8657 |
|  | MMP-10 | 7 | 1.041 | (0.990-1.095) | 0.1211 | 1.040 | (0.950-1.139) | 0.4331 | 1.035 | (0.972-1.101) | 0.2842 | 1.029 | (0.955-1.108) | 0.4842 | 1.033 | (0.973-1.097) | 0.3265 |
|  | OPG | 12 | 0.850 | (0.786-0.920) | 0.0001 | 0.783 | (0.674-0.91) | 0.0097 | 0.835 | (0.752-0.927) | 0.0007 | 0.828 | (0.689-0.996) | 0.0708 | 0.827 | (0.698-0.981) | 0.0514 |
|  | OSM | 12 | 1.029 | (0.972-1.089) | 0.3291 | 0.971 | (0.8250-1.141) | 0.7255 | 1.049 | (0.967-1.138) | 0.2503 | 1.069 | (0.947-1.207) | 0.3020 | 1.064 | (0.962-1.176) | 0.2559 |
|  | PD-L1 | 10 | 1.019 | (0.949-1.095) | 0.5997 | 0.941 | (0.790-1.122) | 0.5201 | 1.016 | (0.926-1.115) | 0.7319 | 1.086 | (0.923-1.278) | 0.3461 | 0.994 | (0.884-1.117) | 0.9223 |
|  | SIRT2 | 11 | 1.038 | (0.971-1.110) | 0.2774 | 1.059 | (0.929-1.207) | 0.4140 | 1.024 | (0.937-1.119) | 0.5969 | 1.024 | (0.893-1.175) | 0.7394 | 1.017 | (0.895-1.157) | 0.7984 |
|  | SLAMF1 | 21 | 1.034 | (0.981-1.090) | 0.2114 | 1.041 | (0.911-1.189) | 0.5612 | 1.032 | (0.959-1.110) | 0.3994 | 1.049 | (0.923-1.192) | 0.4729 | 1.054 | (0.942-1.179) | 0.3714 |
|  | ST1A1 | 14 | 0.961 | (0.913-1.011) | 0.1252 | 1.027 | (0.903-1.168) | 0.6906 | 0.981 | (0.915-1.052) | 0.5873 | 1.010 | (0.897-1.137) | 0.8728 | 0.994 | (0.917-1.078) | 0.8862 |
|  | STAMPB | 8 | 1.064 | (0.958-1.182) | 0.2491 | 1.086 | (0.800-1.475) | 0.6149 | 1.122 | (0.979-1.286) | 0.0980 | 1.155 | (0.933-1.430) | 0.2265 | 1.145 | (0.947-1.386) | 0.2045 |
|  | TNF | 10 | 0.951 | (0.878-1.030) | 0.2180 | 0.994 | (0.794-1.246) | 0.9629 | 0.973 | (0.868-1.092) | 0.6442 | 0.955 | (0.796-1.146) | 0.6334 | 1.033 | (0.885-1.206) | 0.6908 |
|  | TNFB | 15 | 1.017 | (0.957-1.081) | 0.5942 | 1.004 | (0.851-1.186) | 0.9595 | 0.993 | (0.915-1.078) | 0.8696 | 1.015 | (0.905-1.138) | 0.8057 | 1.008 | (0.923-1.101) | 0.8642 |
|  | TNFRSF9 | 19 | 0.957 | (0.911-1.006) | 0.0843 | 0.937 | (0.810-1.085) | 0.3994 | 0.979 | (0.908-1.056) | 0.5812 | 1.021 | (0.893-1.167) | 0.7670 | 0.989 | (0.902-1.084) | 0.8181 |
|  | TNFSF14 | 19 | 1.092 | (1.037-1.150) | 0.0008 | 1.040 | (0.940-1.150) | 0.4596 | 1.067 | (0.989-1.152) | 0.0947 | 1.045 | (0.916-1.192) | 0.5201 | 1.061 | (0.956-1.177) | 0.2783 |
|  | TRAIL | 21 | 0.956 | (0.925-0.987) | 0.0063 | 0.915 | (0.861-0.972) | 0.0096 | 0.949 | (0.907-0.992) | 0.0214 | 0.919 | (0.845-0.998) | 0.0589 | 0.951 | (0.912-0.991) | 0.0259 |
|  | TRANCE | 22 | 0.968 | (0.929-1.008) | 0.1178 | 1.044 | (0.936-1.165) | 0.4484 | 0.989 | (0.932-1.049) | 0.7150 | 0.975 | (0.887-1.071) | 0.5967 | 0.990 | (0.930-1.053) | 0.7514 |
|  | TSLP | 7 | 0.928 | (0.842-1.023) | 0.1317 | 0.877 | (0.720-1.069) | 0.2516 | 0.956 | (0.845-1.081) | 0.4694 | 0.993 | (0.829-1.190) | 0.9421 | 0.967 | (0.826-1.132) | 0.6912 |
|  | TWEAK | 18 | 0.942 | (0.885-1.002) | 0.0564 | 0.978 | (0.849-1.128) | 0.7655 | 0.942 | (0.881-1.008) | 0.0835 | 0.897 | (0.798-1.008) | 0.0861 | 0.942 | (0.875-1.015) | 0.1363 |
|  | uPA | 17 | 0.976 | (0.932-1.021) | 0.2889 | 0.991 | (0.904-1.085) | 0.8418 | 0.965 | (0.900-1.035) | 0.3175 | 0.975 | (0.868-1.096) | 0.6818 | 0.970 | (0.887-1.061) | 0.5156 |

**Note:** OR and 95% CI represent the change in the odds ratio of OSA per 1 SD increase in CIPs level.

**Abbreviations:** SNPs, single nucleotide polymorphisms; OR, Odds Ratio; CI, Confidence interval; Pval, P-value.

**Supplementary Table 3** Heterogeneity and horizontal pleiotropy analyses of 91 CIPs on OSA.

| **Category** | **Exposure** | **Q1** | **Q1 Pval** | **Q2** | **Q2 Pval** | **I2** | **intercept** | **intercept Pval** | **MR PRESSO**  **Global Test Pval** |
| --- | --- | --- | --- | --- | --- | --- | --- | --- | --- |
| **Interleukins** |  |  |  |  |  |  |  |  |  |
|  | IL-1 alpha | 6.779 | 0.3418 | 7.341 | 0.3943 | 4.6% | -0.0078 | 0.5069 | 0.431 |
|  | IL-2RB | 0.951 | 0.9171 | 1.006 | 0.9621 | 0.0% | 0.0030 | 0.8266 | 0.968 |
|  | IL-2 | 0.233 | 0.9721 | 0.265 | 0.9920 | 0.0% | 0.0027 | 0.8694 | 0.993 |
|  | IL-4 | 3.389 | 0.6402 | 7.210 | 0.3019 | 16.8% | 0.0258 | 0.1080 | 0.373 |
|  | IL-5 | 1.859 | 0.8683 | 2.357 | 0.8841 | 0.0% | 0.0102 | 0.5121 | 0.892 |
|  | IL-6 | 1.884 | 0.3898 | 1.940 | 0.5850 | 0.0% | -0.0044 | 0.8360 | 0.729 |
|  | IL-7 | 2.890 | 0.8950 | 3.529 | 0.8969 | 0.0% | 0.0082 | 0.4503 | 0.895 |
|  | IL-8 | 13.392 | 0.4959 | 14.094 | 0.5184 | 0.0% | 0.0047 | 0.4160 | 0.556 |
|  | IL-10RA | 8.362 | 0.3990 | 8.577 | 0.4772 | 0.0% | -0.0029 | 0.6618 | 0.563 |
|  | IL-10RB | 13.206 | 0.4321 | 17.484 | 0.2313 | 19.9% | -0.0092 | 0.0609 | 0.426 |
|  | IL-10 | 10.500 | 0.3978 | 13.903 | 0.2384 | 20.9% | 0.0126 | 0.1020 | 0.290 |
|  | IL-12B | 10.942 | 0.8968 | 15.042 | 0.7200 | 0.0% | -0.0131 | 0.0580 | 0.739 |
|  | IL-13 | 13.563 | 0.0939 | 13.900 | 0.1259 | 35.3% | 0.0044 | 0.6675 | 0.143 |
|  | IL-15RA | 0.218 | 0.9945 | 0.996 | 0.9629 | 0.0% | 0.0090 | 0.4277 | 0.971 |
|  | IL-17A | 4.123 | 0.7655 | 4.158 | 0.8426 | 0.0% | 0.0018 | 0.8568 | 0.830 |
|  | IL-17C | 4.300 | 0.6361 | 5.656 | 0.5804 | 0.0% | -0.0181 | 0.2885 | 0.655 |
|  | IL-18R1 | 15.192 | 0.3652 | 15.996 | 0.3823 | 6.2% | 0.0072 | 0.4038 | 0.396 |
|  | IL-18 | 2.532 | 0.9904 | 3.606 | 0.9801 | 0.0% | -0.0080 | 0.3244 | 0.974 |
|  | IL-20RA | 1.007 | 0.6043 | 2.860 | 0.4138 | 0.0% | 0.0169 | 0.3066 | 0.419 |
|  | IL-20 | 4.706 | 0.8592 | 8.185 | 0.6107 | 0.0% | -0.0229 | 0.0950 | 0.609 |
|  | IL-22RA1 | 1.484 | 0.9605 | 1.486 | 0.9828 | 0.0% | 0.0005 | 0.9731 | 0.982 |
|  | IL-24 | 0.707 | 0.8714 | 1.241 | 0.8713 | 0.0% | 0.0134 | 0.5179 | 0.887 |
|  | IL-33 | 0.117 | 0.9897 | 0.337 | 0.9873 | 0.0% | 0.0052 | 0.6710 | 0.979 |
| **Chemokines** |  |  |  |  |  |  |  |  |  |
|  | CXCL1 | 1.683 | 0.8910 | 1.820 | 0.9355 | 0.0% | -0.0026 | 0.7270 | 0.951 |
|  | CXCL5 | 5.439 | 0.7945 | 8.055 | 0.6235 | 0.0% | -0.0076 | 0.1402 | 0.674 |
|  | CXCL6 | 1.853 | 0.7628 | 1.889 | 0.8643 | 0.0% | 0.0026 | 0.8588 | 0.894 |
|  | CXCL9 | 5.090 | 0.9267 | 5.106 | 0.9543 | 0.0% | 0.0009 | 0.9006 | 0.971 |
|  | CXCL10 | 16.302 | 0.5715 | 18.413 | 0.4950 | 0.0% | 0.0060 | 0.1635 | 0.522 |
|  | CXCL11 | 22.871 | 0.1956 | 22.982 | 0.2381 | 17.3% | -0.0025 | 0.7705 | 0.259 |
|  | CCL2 | 15.896 | 0.4602 | 15.924 | 0.5292 | 0.0% | 0.0007 | 0.8698 | 0.516 |
|  | CCL4 | 0.772 | 0.9788 | 0.847 | 0.9908 | 0.0% | -0.0026 | 0.7956 | 0.991 |
|  | CCL7 | 21.347 | 0.0663 | 21.721 | 0.0845 | 35.5% | 0.0040 | 0.6413 | 0.111 |
|  | CCL8 | 23.213 | 0.3898 | 24.655 | 0.3683 | 6.7% | 0.0043 | 0.2548 | 0.426 |
|  | CCL11 | 13.380 | 0.4968 | 13.634 | 0.5534 | 0.0% | 0.0030 | 0.6222 | 0.597 |
|  | CCL13 | 26.233 | 0.0508 | 27.210 | 0.0551 | 37.5% | 0.0051 | 0.4516 | 0.069 |
|  | CCL19 | 8.444 | 0.4901 | 9.292 | 0.5046 | 0.0% | 0.0061 | 0.3810 | 0.520 |
|  | CCL20 | 5.794 | 0.8868 | 5.983 | 0.9169 | 0.0% | 0.0037 | 0.6717 | 0.932 |
|  | CCL23 | 18.945 | 0.2163 | 19.277 | 0.2545 | 17.0% | -0.0032 | 0.6152 | 0.278 |
|  | CCL25 | 2.054 | 0.9959 | 2.197 | 0.9977 | 0.0% | -0.0032 | 0.7130 | 0.997 |
|  | CCL28 | 26.212 | 0.0511 | 27.229 | 0.0548 | 37.6% | 0.0059 | 0.4421 | 0.055 |
|  | CX3CL1 | 17.820 | 0.3345 | 17.820 | 0.4003 | 4.6% | -0.0001 | 0.9897 | 0.415 |
|  | MIP-1 alpha | 6.588 | 0.3607 | 7.898 | 0.3417 | 11.4% | 0.0106 | 0.3166 | 0.393 |
| **Growth factors** |  |  |  |  |  |  |  |  |  |
|  | Beta-NGF | 15.653 | 0.5485 | 16.221 | 0.5771 | 0.0% | 0.0059 | 0.4614 | 0.551 |
|  | DNER | 8.964 | 0.4406 | 9.688 | 0.4683 | 0.0% | -0.0077 | 0.4170 | 0.482 |
|  | FGF-5 | 9.716 | 0.9596 | 10.871 | 0.9495 | 0.0% | -0.0052 | 0.2960 | 0.958 |
|  | FGF-19 | 7.545 | 0.6732 | 7.555 | 0.7526 | 0.0% | 0.0007 | 0.9230 | 0.766 |
|  | FGF-21 | 11.105 | 0.3494 | 11.394 | 0.4109 | 3.5% | 0.0043 | 0.6208 | 0.491 |
|  | FGF-23 | 0.537 | 0.9698 | 1.564 | 0.9056 | 0.0% | -0.0143 | 0.3682 | 0.924 |
|  | HGF | 7.640 | 0.7451 | 8.355 | 0.7568 | 0.0% | -0.0066 | 0.4158 | 0.783 |
|  | LAP TGF-beta-1 | 12.565 | 0.7042 | 12.786 | 0.7504 | 0.0% | -0.0025 | 0.6446 | 0.777 |
|  | TGF-alpha | 3.246 | 0.5176 | 4.642 | 0.4611 | 0.0% | 0.0125 | 0.3028 | 0.510 |
|  | VEGF_A | 10.578 | 0.6461 | 10.578 | 0.7188 | 0.0% | 0.0001 | 0.9894 | 0.815 |
|  | SCF | 33.990 | 0.1663 | 33.991 | 0.2012 | 17.6% | -0.0001 | 0.9781 | 0.233 |
|  | ARTN | 1.862 | 0.9935 | 1.934 | 0.9968 | 0.0% | 0.0021 | 0.7942 | 0.995 |
|  | CSF-1 | 3.035 | 0.9322 | 3.511 | 0.9406 | 0.0% | -0.0107 | 0.5097 | 0.942 |
|  | Flt3L | 33.079 | 0.0797 | 34.409 | 0.0777 | 30.3% | 0.0040 | 0.3463 | 0.097 |
|  | hGDNF | 8.207 | 0.3147 | 9.732 | 0.2843 | 17.8% | 0.0105 | 0.2916 | 0.434 |
|  | LIF | 10.657 | 0.0586 | 10.989 | 0.0887 | 45.4% | 0.0056 | 0.7092 | 0.126 |
|  | LIF-R | 15.718 | 0.0730 | 15.719 | 0.1080 | 36.4% | 0.0003 | 0.9781 | 0.119 |
|  | NRTN | 11.686 | 0.1114 | 13.261 | 0.1032 | 39.7% | 0.0128 | 0.3638 | 0.143 |
|  | NT-3 | 7.188 | 0.7836 | 7.244 | 0.8411 | 0.0% | 0.0017 | 0.8172 | 0.859 |
| **Others** |  |  |  |  |  |  |  |  |  |
|  | 4EBP1 | 3.877 | 0.6933 | 4.345 | 0.7393 | 0.0% | -0.0057 | 0.5193 | 0.790 |
|  | ADA | 7.070 | 0.4216 | 10.299 | 0.2447 | 22.3% | 0.0156 | 0.1169 | 0.261 |
|  | AXIN1 | 2.952 | 0.8149 | 3.138 | 0.8719 | 0.0% | -0.0041 | 0.6807 | 0.883 |
|  | CASP-8 | 2.991 | 0.8100 | 3.200 | 0.8659 | 0.0% | 0.0039 | 0.6636 | 0.823 |
|  | CD5 | 13.529 | 0.4853 | 13.609 | 0.5554 | 0.0% | 0.0019 | 0.7824 | 0.590 |
|  | CD6 | 4.252 | 0.6426 | 4.949 | 0.6662 | 0.0% | 0.0103 | 0.4360 | 0.745 |
|  | CD40 | 10.453 | 0.4017 | 10.539 | 0.4827 | 0.0% | -0.0017 | 0.7798 | 0.538 |
|  | CD244 | 9.647 | 0.8413 | 11.394 | 0.7845 | 0.0% | 0.0064 | 0.2061 | 0.800 |
|  | CDCP1 | 14.753 | 0.4694 | 14.901 | 0.5319 | 0.0% | -0.0019 | 0.7051 | 0.512 |
|  | CST5 | 31.836 | 0.1986 | 34.973 | 0.1395 | 22.8% | 0.0061 | 0.1215 | 0.136 |
|  | EN-RAGE | 9.631 | 0.5638 | 9.993 | 0.6166 | 0.0% | 0.0040 | 0.5595 | 0.659 |
|  | IFN-gamma | 9.115 | 0.2445 | 10.313 | 0.2437 | 22.4% | -0.0078 | 0.3693 | 0.274 |
|  | MMP-1 | 13.864 | 0.0854 | 13.866 | 0.1272 | 35.1% | -0.0003 | 0.9700 | 0.160 |
|  | MMP-10 | 5.670 | 0.3396 | 5.670 | 0.4611 | 0.0% | 0.0002 | 0.9882 | 0.603 |
|  | OPG | 5.114 | 0.8835 | 6.705 | 0.8224 | 0.0% | 0.0106 | 0.2357 | 0.842 |
|  | OSM | 17.111 | 0.0719 | 18.182 | 0.0775 | 39.5% | 0.0067 | 0.4472 | 0.089 |
|  | PD-L1 | 5.774 | 0.6726 | 6.716 | 0.6667 | 0.0% | 0.0072 | 0.3601 | 0.680 |
|  | SIRT2 | 5.969 | 0.7431 | 6.090 | 0.8076 | 0.0% | -0.0028 | 0.7354 | 0.813 |
|  | SLAMF1 | 11.790 | 0.8944 | 11.801 | 0.9227 | 0.0% | -0.0006 | 0.9161 | 0.935 |
|  | ST1A1 | 6.187 | 0.9064 | 7.416 | 0.8795 | 0.0% | -0.0078 | 0.2892 | 0.869 |
|  | STAMPB | 5.303 | 0.5055 | 5.324 | 0.6205 | 0.0% | -0.0023 | 0.8920 | 0.673 |
|  | TNF | 9.129 | 0.3315 | 9.328 | 0.4076 | 3.5% | -0.0041 | 0.6873 | 0.409 |
|  | TNFB | 14.972 | 0.3091 | 15.000 | 0.3781 | 6.7% | 0.0019 | 0.8783 | 0.435 |
|  | TNFRSF9 | 26.381 | 0.0678 | 26.527 | 0.0883 | 32.1% | 0.0023 | 0.7632 | 0.089 |
|  | TNFSF14 | 12.889 | 0.7436 | 14.126 | 0.7209 | 0.0% | 0.0059 | 0.2816 | 0.732 |
|  | TRAIL | 25.185 | 0.1546 | 29.480 | 0.0787 | 32.2% | 0.0094 | 0.0877 | 0.126 |
|  | TRANCE | 24.842 | 0.2076 | 27.610 | 0.1516 | 23.9% | -0.0090 | 0.1511 | 0.171 |
|  | TSLP | 3.133 | 0.6796 | 3.537 | 0.7391 | 0.0% | 0.0068 | 0.5529 | 0.753 |
|  | TWEAK | 28.526 | 0.0273 | 29.140 | 0.0333 | 41.7% | -0.0048 | 0.5654 | 0.053 |
|  | uPA | 12.193 | 0.6644 | 12.335 | 0.7206 | 0.0% | -0.0018 | 0.7111 | 0.716 |

**Abbreviations:** Q, Cochran Q statistics; Q1, Q test from MR Egger method; Q1 Pval, P-value of Q test from MR Egger method; Q2, Q test from inverse variance weighted method; Q2 Pval, P-value of Q test from inverse variance weighted method; Pval, P-value.

**Supplementary Table 4** Details of OSA predicting SNPs with CIPs (with SNPs reaching P-value < 5x10⁻8).

|  | **OSA** | | | | |  | **CIPs** | |  |  |
| --- | --- | --- | --- | --- | --- | --- | --- | --- | --- | --- |
| **SNP** | **effect allele** | **other allele** | **beta** | **se** | **Pval** |  | **log(OR)** | **se** | **R2** | **F** |
| **IL-1 alpha** |  |  |  |  |  |  |  |  |  |  |
| rs10507084 | T | C | 0.0647 | 0.0100 | 8.23E-11 |  | -0.4309 | 0.0252 | 1.12E-04 | 42.20 |
| rs10986730 | T | C | -0.0468 | 0.0077 | 1.16E-09 |  | 0.0192 | 0.0130 | 9.86E-05 | 37.03 |
| rs113955098 | A | G | -0.0994 | 0.0158 | 3.38E-10 |  | -0.0342 | 0.0451 | 1.05E-04 | 39.44 |
| rs114106239 | T | C | -0.1206 | 0.0212 | 1.19E-08 |  | 0.4694 | 0.0544 | 8.65E-05 | 32.51 |
| rs11981973 | G | A | 0.0613 | 0.0098 | 4.72E-10 |  | -0.0538 | 0.0171 | 1.03E-04 | 38.79 |
| rs1228509 | C | A | 0.0471 | 0.0081 | 6.41E-09 |  | 0.0212 | 0.0140 | 8.97E-05 | 33.71 |
| rs13114985 | G | T | 0.0457 | 0.0081 | 2.01E-08 |  | 0.9939 | 0.0137 | 8.38E-05 | 31.48 |
| rs140896965 | T | C | -0.1125 | 0.0185 | 1.11E-09 |  | -0.2106 | 0.0629 | 9.88E-05 | 37.13 |
| rs2016950 | T | C | -0.0586 | 0.0107 | 4.13E-08 |  | 0.2320 | 0.0185 | 8.01E-05 | 30.09 |
| rs2370982 | T | C | 0.0515 | 0.0089 | 7.97E-09 |  | 0.1883 | 0.0156 | 8.86E-05 | 33.28 |
| rs59333125 | C | A | -0.0816 | 0.0144 | 1.32E-08 |  | 0.1397 | 0.0271 | 8.60E-05 | 32.30 |
| rs61873510 | T | G | 0.0464 | 0.0084 | 3.28E-08 |  | 0.2563 | 0.0148 | 8.13E-05 | 30.53 |
| rs6484367 | A | G | 0.0468 | 0.0077 | 1.13E-09 |  | 0.4440 | 0.0134 | 9.87E-05 | 37.09 |
| rs76229479 | C | A | -0.0780 | 0.0131 | 2.64E-09 |  | -0.2462 | 0.0202 | 9.43E-05 | 35.44 |
| **IL-2RB** |  |  |  |  |  |  |  |  |  |  |
| rs10507084 | T | C | 0.0647 | 0.0100 | 8.23E-11 |  | 0.4572 | 0.0252 | 1.12E-04 | 42.20 |
| rs11075985 | A | C | 0.0821 | 0.0077 | 2.15E-26 |  | -0.0134 | 0.0129 | 3.01E-04 | 113.01 |
| rs113955098 | A | G | -0.0994 | 0.0158 | 3.38E-10 |  | -0.1670 | 0.0448 | 1.05E-04 | 39.44 |
| rs114106239 | T | C | -0.1206 | 0.0212 | 1.19E-08 |  | 0.7811 | 0.0544 | 8.65E-05 | 32.51 |
| rs11981973 | G | A | 0.0613 | 0.0098 | 4.72E-10 |  | -0.3639 | 0.0170 | 1.03E-04 | 38.79 |
| rs1228509 | C | A | 0.0471 | 0.0081 | 6.41E-09 |  | 0.1529 | 0.0140 | 8.97E-05 | 33.71 |
| rs13114985 | G | T | 0.0457 | 0.0081 | 2.01E-08 |  | -0.4729 | 0.0137 | 8.38E-05 | 31.48 |
| rs140896965 | T | C | -0.1125 | 0.0185 | 1.11E-09 |  | 0.9172 | 0.0633 | 9.88E-05 | 37.13 |
| rs2016950 | T | C | -0.0586 | 0.0107 | 4.13E-08 |  | 0.1995 | 0.0184 | 8.01E-05 | 30.09 |
| rs59333125 | C | A | -0.0816 | 0.0144 | 1.32E-08 |  | 0.3701 | 0.0271 | 8.60E-05 | 32.30 |
| rs60700772 | C | T | 0.0517 | 0.0092 | 2.20E-08 |  | -0.3579 | 0.0155 | 8.33E-05 | 31.31 |
| rs61873510 | T | G | 0.0464 | 0.0084 | 3.28E-08 |  | -0.2283 | 0.0148 | 8.13E-05 | 30.53 |
| rs6484367 | A | G | 0.0468 | 0.0077 | 1.13E-09 |  | 0.0854 | 0.0133 | 9.87E-05 | 37.09 |
| rs679880 | A | G | 0.0495 | 0.0089 | 2.53E-08 |  | 0.0706 | 0.0162 | 8.26E-05 | 31.04 |
| rs76229479 | C | A | -0.0780 | 0.0131 | 2.64E-09 |  | 0.4090 | 0.0200 | 9.43E-05 | 35.44 |
| **IL-2** |  |  |  |  |  |  |  |  |  |  |
| rs10986730 | T | C | -0.0468 | 0.0077 | 1.16E-09 |  | -0.0021 | 0.0129 | 9.86E-05 | 37.03 |
| rs113955098 | A | G | -0.0994 | 0.0158 | 3.38E-10 |  | -0.3902 | 0.0448 | 1.05E-04 | 39.44 |
| rs114106239 | T | C | -0.1206 | 0.0212 | 1.19E-08 |  | -0.1211 | 0.0544 | 8.65E-05 | 32.51 |
| rs11981973 | G | A | 0.0613 | 0.0098 | 4.72E-10 |  | -0.1827 | 0.0170 | 1.03E-04 | 38.79 |
| rs1228509 | C | A | 0.0471 | 0.0081 | 6.41E-09 |  | 0.0276 | 0.0140 | 8.97E-05 | 33.71 |
| rs140896965 | T | C | -0.1125 | 0.0185 | 1.11E-09 |  | -0.1626 | 0.0627 | 9.88E-05 | 37.13 |
| rs2016950 | T | C | -0.0586 | 0.0107 | 4.13E-08 |  | 0.0136 | 0.0184 | 8.01E-05 | 30.09 |
| rs2370982 | T | C | 0.0515 | 0.0089 | 7.97E-09 |  | 0.0311 | 0.0155 | 8.86E-05 | 33.28 |
| rs59333125 | C | A | -0.0816 | 0.0144 | 1.32E-08 |  | -0.2917 | 0.0270 | 8.60E-05 | 32.30 |
| rs60700772 | C | T | 0.0517 | 0.0092 | 2.20E-08 |  | 0.0097 | 0.0155 | 8.33E-05 | 31.31 |
| rs6484367 | A | G | 0.0468 | 0.0077 | 1.13E-09 |  | -0.2092 | 0.0133 | 9.87E-05 | 37.09 |
| **IL-4** |  |  |  |  |  |  |  |  |  |  |
| rs10507084 | T | C | 0.0647 | 0.0100 | 8.23E-11 |  | 0.0000 | 0.0251 | 1.12E-04 | 42.20 |
| rs10986730 | T | C | -0.0468 | 0.0077 | 1.16E-09 |  | 0.4509 | 0.0132 | 9.86E-05 | 37.03 |
| rs11075985 | A | C | 0.0821 | 0.0077 | 2.15E-26 |  | -0.1792 | 0.0133 | 3.01E-04 | 113.01 |
| rs113955098 | A | G | -0.0994 | 0.0158 | 3.38E-10 |  | -0.1871 | 0.0461 | 1.05E-04 | 39.44 |
| rs114106239 | T | C | -0.1206 | 0.0212 | 1.19E-08 |  | 0.2861 | 0.0543 | 8.65E-05 | 32.51 |
| rs11981973 | G | A | 0.0613 | 0.0098 | 4.72E-10 |  | 0.0914 | 0.0174 | 1.03E-04 | 38.79 |
| rs1228509 | C | A | 0.0471 | 0.0081 | 6.41E-09 |  | -0.0531 | 0.0140 | 8.97E-05 | 33.71 |
| rs13114985 | G | T | 0.0457 | 0.0081 | 2.01E-08 |  | 0.2124 | 0.0137 | 8.38E-05 | 31.48 |
| rs140896965 | T | C | -0.1125 | 0.0185 | 1.11E-09 |  | -0.0818 | 0.0626 | 9.88E-05 | 37.13 |
| rs2016950 | T | C | -0.0586 | 0.0107 | 4.13E-08 |  | -0.3735 | 0.0189 | 8.01E-05 | 30.09 |
| rs2370982 | T | C | 0.0515 | 0.0089 | 7.97E-09 |  | 0.2931 | 0.0159 | 8.86E-05 | 33.28 |
| rs59333125 | C | A | -0.0816 | 0.0144 | 1.32E-08 |  | 0.4008 | 0.0271 | 8.60E-05 | 32.30 |
| rs60700772 | C | T | 0.0517 | 0.0092 | 2.20E-08 |  | -0.1876 | 0.0160 | 8.33E-05 | 31.31 |
| rs61873510 | T | G | 0.0464 | 0.0084 | 3.28E-08 |  | -0.0302 | 0.0148 | 8.13E-05 | 30.53 |
| rs6484367 | A | G | 0.0468 | 0.0077 | 1.13E-09 |  | 0.0107 | 0.0133 | 9.87E-05 | 37.09 |
| rs679880 | A | G | 0.0495 | 0.0089 | 2.53E-08 |  | -0.1736 | 0.0166 | 8.26E-05 | 31.04 |
| rs76229479 | C | A | -0.0780 | 0.0131 | 2.64E-09 |  | 0.4154 | 0.0205 | 9.43E-05 | 35.44 |
| **IL-5** |  |  |  |  |  |  |  |  |  |  |
| rs10507084 | T | C | 0.0647 | 0.0100 | 8.23E-11 |  | 0.2440 | 0.0251 | 1.12E-04 | 42.20 |
| rs10986730 | T | C | -0.0468 | 0.0077 | 1.16E-09 |  | -0.1774 | 0.0132 | 9.86E-05 | 37.03 |
| rs11075985 | A | C | 0.0821 | 0.0077 | 2.15E-26 |  | 0.0402 | 0.0133 | 3.01E-04 | 113.01 |
| rs113955098 | A | G | -0.0994 | 0.0158 | 3.38E-10 |  | 0.5673 | 0.0461 | 1.05E-04 | 39.44 |
| rs114106239 | T | C | -0.1206 | 0.0212 | 1.19E-08 |  | -0.1584 | 0.0543 | 8.65E-05 | 32.51 |
| rs11981973 | G | A | 0.0613 | 0.0098 | 4.72E-10 |  | 0.5385 | 0.0174 | 1.03E-04 | 38.79 |
| rs1228509 | C | A | 0.0471 | 0.0081 | 6.41E-09 |  | 0.3992 | 0.0140 | 8.97E-05 | 33.71 |
| rs13114985 | G | T | 0.0457 | 0.0081 | 2.01E-08 |  | -0.2999 | 0.0137 | 8.38E-05 | 31.48 |
| rs140896965 | T | C | -0.1125 | 0.0185 | 1.11E-09 |  | -0.1431 | 0.0615 | 9.88E-05 | 37.13 |
| rs2016950 | T | C | -0.0586 | 0.0107 | 4.13E-08 |  | 0.0205 | 0.0188 | 8.01E-05 | 30.09 |
| rs2370982 | T | C | 0.0515 | 0.0089 | 7.97E-09 |  | 0.1689 | 0.0159 | 8.86E-05 | 33.28 |
| rs59333125 | C | A | -0.0816 | 0.0144 | 1.32E-08 |  | -0.2917 | 0.0270 | 8.60E-05 | 32.30 |
| rs60700772 | C | T | 0.0517 | 0.0092 | 2.20E-08 |  | -0.1954 | 0.0159 | 8.33E-05 | 31.31 |
| rs61873510 | T | G | 0.0464 | 0.0084 | 3.28E-08 |  | 0.1723 | 0.0148 | 8.13E-05 | 30.53 |
| rs6484367 | A | G | 0.0468 | 0.0077 | 1.13E-09 |  | -0.1644 | 0.0133 | 9.87E-05 | 37.09 |
| rs679880 | A | G | 0.0495 | 0.0089 | 2.53E-08 |  | 0.3996 | 0.0166 | 8.26E-05 | 31.04 |
| rs76229479 | C | A | -0.0780 | 0.0131 | 2.64E-09 |  | 0.0667 | 0.0206 | 9.43E-05 | 35.44 |
| **IL-6** |  |  |  |  |  |  |  |  |  |  |
| rs10507084 | T | C | 0.0647 | 0.0100 | 8.23E-11 |  | -0.3290 | 0.0248 | 1.12E-04 | 42.20 |
| rs10986730 | T | C | -0.0468 | 0.0077 | 1.16E-09 |  | -0.5513 | 0.0118 | 9.86E-05 | 37.03 |
| rs11075985 | A | C | 0.0821 | 0.0077 | 2.15E-26 |  | 0.1633 | 0.0118 | 3.01E-04 | 113.01 |
| rs113955098 | A | G | -0.0994 | 0.0158 | 3.38E-10 |  | 0.2102 | 0.0430 | 1.05E-04 | 39.44 |
| rs114106239 | T | C | -0.1206 | 0.0212 | 1.19E-08 |  | 0.5606 | 0.0494 | 8.65E-05 | 32.51 |
| rs11981973 | G | A | 0.0613 | 0.0098 | 4.72E-10 |  | -0.4373 | 0.0156 | 1.03E-04 | 38.79 |
| rs1228509 | C | A | 0.0471 | 0.0081 | 6.41E-09 |  | 0.2293 | 0.0123 | 8.97E-05 | 33.71 |
| rs13114985 | G | T | 0.0457 | 0.0081 | 2.01E-08 |  | 0.5342 | 0.0121 | 8.38E-05 | 31.48 |
| rs140896965 | T | C | -0.1125 | 0.0185 | 1.11E-09 |  | 0.0773 | 0.0572 | 9.88E-05 | 37.13 |
| rs2016950 | T | C | -0.0586 | 0.0107 | 4.13E-08 |  | 0.1688 | 0.0167 | 8.01E-05 | 30.09 |
| rs2370982 | T | C | 0.0515 | 0.0089 | 7.97E-09 |  | 0.0738 | 0.0143 | 8.86E-05 | 33.28 |
| rs59333125 | C | A | -0.0816 | 0.0144 | 1.32E-08 |  | 0.1079 | 0.0235 | 8.60E-05 | 32.30 |
| rs60700772 | C | T | 0.0517 | 0.0092 | 2.20E-08 |  | 0.4198 | 0.0143 | 8.33E-05 | 31.31 |
| rs61873510 | T | G | 0.0464 | 0.0084 | 3.28E-08 |  | -0.0022 | 0.0129 | 8.13E-05 | 30.53 |
| rs6484367 | A | G | 0.0468 | 0.0077 | 1.13E-09 |  | 0.3159 | 0.0118 | 9.87E-05 | 37.09 |
| rs679880 | A | G | 0.0495 | 0.0089 | 2.53E-08 |  | 0.3027 | 0.0146 | 8.26E-05 | 31.04 |
| rs76229479 | C | A | -0.0780 | 0.0131 | 2.64E-09 |  | 0.0859 | 0.0185 | 9.43E-05 | 35.44 |
| **IL-7** |  |  |  |  |  |  |  |  |  |  |
| rs10507084 | T | C | 0.0647 | 0.0100 | 8.23E-11 |  | 0.1498 | 0.0251 | 1.12E-04 | 42.20 |
| rs10986730 | T | C | -0.0468 | 0.0077 | 1.16E-09 |  | 0.0235 | 0.0117 | 9.86E-05 | 37.03 |
| rs113955098 | A | G | -0.0994 | 0.0158 | 3.38E-10 |  | 0.1961 | 0.0431 | 1.05E-04 | 39.44 |
| rs114106239 | T | C | -0.1206 | 0.0212 | 1.19E-08 |  | -0.1318 | 0.0497 | 8.65E-05 | 32.51 |
| rs11981973 | G | A | 0.0613 | 0.0098 | 4.72E-10 |  | -0.0587 | 0.0156 | 1.03E-04 | 38.79 |
| rs1228509 | C | A | 0.0471 | 0.0081 | 6.41E-09 |  | 0.0319 | 0.0124 | 8.97E-05 | 33.71 |
| rs13114985 | G | T | 0.0457 | 0.0081 | 2.01E-08 |  | -0.0241 | 0.0122 | 8.38E-05 | 31.48 |
| rs140896965 | T | C | -0.1125 | 0.0185 | 1.11E-09 |  | 0.3564 | 0.0592 | 9.88E-05 | 37.13 |
| rs2016950 | T | C | -0.0586 | 0.0107 | 4.13E-08 |  | -0.1808 | 0.0167 | 8.01E-05 | 30.09 |
| rs2370982 | T | C | 0.0515 | 0.0089 | 7.97E-09 |  | -0.1902 | 0.0143 | 8.86E-05 | 33.28 |
| rs59333125 | C | A | -0.0816 | 0.0144 | 1.32E-08 |  | 0.3358 | 0.0238 | 8.60E-05 | 32.30 |
| rs60700772 | C | T | 0.0517 | 0.0092 | 2.20E-08 |  | 0.1180 | 0.0143 | 8.33E-05 | 31.31 |
| rs61873510 | T | G | 0.0464 | 0.0084 | 3.28E-08 |  | -0.0065 | 0.0130 | 8.13E-05 | 30.53 |
| rs6484367 | A | G | 0.0468 | 0.0077 | 1.13E-09 |  | 0.1751 | 0.0119 | 9.87E-05 | 37.09 |
| **IL-8** |  |  |  |  |  |  |  |  |  |  |
| rs10507084 | T | C | 0.0647 | 0.0100 | 8.23E-11 |  | -0.5251 | 0.0247 | 1.12E-04 | 42.20 |
| rs10986730 | T | C | -0.0468 | 0.0077 | 1.16E-09 |  | -0.2222 | 0.0117 | 9.86E-05 | 37.03 |
| rs114106239 | T | C | -0.1206 | 0.0212 | 1.19E-08 |  | -0.1252 | 0.0494 | 8.65E-05 | 32.51 |
| rs11981973 | G | A | 0.0613 | 0.0098 | 4.72E-10 |  | 0.0000 | 0.0156 | 1.03E-04 | 38.79 |
| rs140896965 | T | C | -0.1125 | 0.0185 | 1.11E-09 |  | -0.1964 | 0.0563 | 9.88E-05 | 37.13 |
| rs2016950 | T | C | -0.0586 | 0.0107 | 4.13E-08 |  | -0.1825 | 0.0167 | 8.01E-05 | 30.09 |
| rs59333125 | C | A | -0.0816 | 0.0144 | 1.32E-08 |  | -0.0098 | 0.0234 | 8.60E-05 | 32.30 |
| rs60700772 | C | T | 0.0517 | 0.0092 | 2.20E-08 |  | -0.0193 | 0.0142 | 8.33E-05 | 31.31 |
| rs76229479 | C | A | -0.0780 | 0.0131 | 2.64E-09 |  | -0.2705 | 0.0184 | 9.43E-05 | 35.44 |
| **IL-10RA** |  |  |  |  |  |  |  |  |  |  |
| rs10507084 | T | C | 0.0647 | 0.0100 | 8.23E-11 |  | 0.0664 | 0.0251 | 1.12E-04 | 42.20 |
| rs10986730 | T | C | -0.0468 | 0.0077 | 1.16E-09 |  | -0.0513 | 0.0130 | 9.86E-05 | 37.03 |
| rs11075985 | A | C | 0.0821 | 0.0077 | 2.15E-26 |  | 0.2267 | 0.0131 | 3.01E-04 | 113.01 |
| rs113955098 | A | G | -0.0994 | 0.0158 | 3.38E-10 |  | 0.1619 | 0.0452 | 1.05E-04 | 39.44 |
| rs114106239 | T | C | -0.1206 | 0.0212 | 1.19E-08 |  | -0.0481 | 0.0543 | 8.65E-05 | 32.51 |
| rs11981973 | G | A | 0.0613 | 0.0098 | 4.72E-10 |  | 0.2007 | 0.0172 | 1.03E-04 | 38.79 |
| rs1228509 | C | A | 0.0471 | 0.0081 | 6.41E-09 |  | -0.5542 | 0.0140 | 8.97E-05 | 33.71 |
| rs13114985 | G | T | 0.0457 | 0.0081 | 2.01E-08 |  | 0.3853 | 0.0137 | 8.38E-05 | 31.48 |
| rs140896965 | T | C | -0.1125 | 0.0185 | 1.11E-09 |  | 0.1591 | 0.0627 | 9.88E-05 | 37.13 |
| rs2016950 | T | C | -0.0586 | 0.0107 | 4.13E-08 |  | 0.0017 | 0.0186 | 8.01E-05 | 30.09 |
| rs2370982 | T | C | 0.0515 | 0.0089 | 7.97E-09 |  | 0.3300 | 0.0156 | 8.86E-05 | 33.28 |
| rs59333125 | C | A | -0.0816 | 0.0144 | 1.32E-08 |  | 0.1324 | 0.0271 | 8.60E-05 | 32.30 |
| rs60700772 | C | T | 0.0517 | 0.0092 | 2.20E-08 |  | 0.2283 | 0.0157 | 8.33E-05 | 31.31 |
| rs61873510 | T | G | 0.0464 | 0.0084 | 3.28E-08 |  | 0.5427 | 0.0148 | 8.13E-05 | 30.53 |
| rs6484367 | A | G | 0.0468 | 0.0077 | 1.13E-09 |  | -0.1260 | 0.0133 | 9.87E-05 | 37.09 |
| rs679880 | A | G | 0.0495 | 0.0089 | 2.53E-08 |  | 0.6297 | 0.0164 | 8.26E-05 | 31.04 |
| rs76229479 | C | A | -0.0780 | 0.0131 | 2.64E-09 |  | 0.0308 | 0.0202 | 9.43E-05 | 35.44 |
| **IL-10RB** |  |  |  |  |  |  |  |  |  |  |
| rs10507084 | T | C | 0.0647 | 0.0100 | 8.23E-11 |  | 0.2162 | 0.0251 | 1.12E-04 | 42.20 |
| rs11075985 | A | C | 0.0821 | 0.0077 | 2.15E-26 |  | 0.1292 | 0.0114 | 3.01E-04 | 113.01 |
| rs113955098 | A | G | -0.0994 | 0.0158 | 3.38E-10 |  | 0.4898 | 0.0414 | 1.05E-04 | 39.44 |
| rs114106239 | T | C | -0.1206 | 0.0212 | 1.19E-08 |  | -0.1617 | 0.0495 | 8.65E-05 | 32.51 |
| rs11981973 | G | A | 0.0613 | 0.0098 | 4.72E-10 |  | -0.1550 | 0.0150 | 1.03E-04 | 38.79 |
| rs1228509 | C | A | 0.0471 | 0.0081 | 6.41E-09 |  | 0.0743 | 0.0123 | 8.97E-05 | 33.71 |
| rs13114985 | G | T | 0.0457 | 0.0081 | 2.01E-08 |  | -0.0504 | 0.0121 | 8.38E-05 | 31.48 |
| rs140896965 | T | C | -0.1125 | 0.0185 | 1.11E-09 |  | 0.8301 | 0.0593 | 9.88E-05 | 37.13 |
| rs2370982 | T | C | 0.0515 | 0.0089 | 7.97E-09 |  | 0.1184 | 0.0137 | 8.86E-05 | 33.28 |
| rs59333125 | C | A | -0.0816 | 0.0144 | 1.32E-08 |  | -0.2905 | 0.0237 | 8.60E-05 | 32.30 |
| rs60700772 | C | T | 0.0517 | 0.0092 | 2.20E-08 |  | 0.1683 | 0.0137 | 8.33E-05 | 31.31 |
| rs61873510 | T | G | 0.0464 | 0.0084 | 3.28E-08 |  | -0.0345 | 0.0130 | 8.13E-05 | 30.53 |
| rs6484367 | A | G | 0.0468 | 0.0077 | 1.13E-09 |  | 0.1131 | 0.0118 | 9.87E-05 | 37.09 |
| rs679880 | A | G | 0.0495 | 0.0089 | 2.53E-08 |  | 0.2402 | 0.0141 | 8.26E-05 | 31.04 |
| **IL-10** |  |  |  |  |  |  |  |  |  |  |
| rs10507084 | T | C | 0.0647 | 0.0100 | 8.23E-11 |  | 0.0355 | 0.0252 | 1.12E-04 | 42.20 |
| rs10986730 | T | C | -0.0468 | 0.0077 | 1.16E-09 |  | -0.4509 | 0.0118 | 9.86E-05 | 37.03 |
| rs11075985 | A | C | 0.0821 | 0.0077 | 2.15E-26 |  | 0.1816 | 0.0118 | 3.01E-04 | 113.01 |
| rs113955098 | A | G | -0.0994 | 0.0158 | 3.38E-10 |  | -0.1237 | 0.0435 | 1.05E-04 | 39.44 |
| rs114106239 | T | C | -0.1206 | 0.0212 | 1.19E-08 |  | 0.1667 | 0.0496 | 8.65E-05 | 32.51 |
| rs11981973 | G | A | 0.0613 | 0.0098 | 4.72E-10 |  | -0.3541 | 0.0156 | 1.03E-04 | 38.79 |
| rs1228509 | C | A | 0.0471 | 0.0081 | 6.41E-09 |  | 0.4013 | 0.0124 | 8.97E-05 | 33.71 |
| rs13114985 | G | T | 0.0457 | 0.0081 | 2.01E-08 |  | 0.3284 | 0.0122 | 8.38E-05 | 31.48 |
| rs140896965 | T | C | -0.1125 | 0.0185 | 1.11E-09 |  | -0.0809 | 0.0593 | 9.88E-05 | 37.13 |
| rs2016950 | T | C | -0.0586 | 0.0107 | 4.13E-08 |  | -0.2371 | 0.0167 | 8.01E-05 | 30.09 |
| rs2370982 | T | C | 0.0515 | 0.0089 | 7.97E-09 |  | -0.1961 | 0.0143 | 8.86E-05 | 33.28 |
| rs59333125 | C | A | -0.0816 | 0.0144 | 1.32E-08 |  | 0.0907 | 0.0238 | 8.60E-05 | 32.30 |
| rs60700772 | C | T | 0.0517 | 0.0092 | 2.20E-08 |  | 0.5358 | 0.0143 | 8.33E-05 | 31.31 |
| rs61873510 | T | G | 0.0464 | 0.0084 | 3.28E-08 |  | 0.1141 | 0.0130 | 8.13E-05 | 30.53 |
| rs6484367 | A | G | 0.0468 | 0.0077 | 1.13E-09 |  | 0.3586 | 0.0119 | 9.87E-05 | 37.09 |
| rs679880 | A | G | 0.0495 | 0.0089 | 2.53E-08 |  | 0.1675 | 0.0146 | 8.26E-05 | 31.04 |
| rs76229479 | C | A | -0.0780 | 0.0131 | 2.64E-09 |  | 0.1372 | 0.0184 | 9.43E-05 | 35.44 |
| **IL-12B** |  |  |  |  |  |  |  |  |  |  |
| rs10507084 | T | C | 0.0647 | 0.0100 | 8.23E-11 |  | 0.5745 | 0.0252 | 1.12E-04 | 42.20 |
| rs10986730 | T | C | -0.0468 | 0.0077 | 1.16E-09 |  | -0.5342 | 0.0117 | 9.86E-05 | 37.03 |
| rs11075985 | A | C | 0.0821 | 0.0077 | 2.15E-26 |  | 0.0792 | 0.0117 | 3.01E-04 | 113.01 |
| rs113955098 | A | G | -0.0994 | 0.0158 | 3.38E-10 |  | -0.6718 | 0.0435 | 1.05E-04 | 39.44 |
| rs114106239 | T | C | -0.1206 | 0.0212 | 1.19E-08 |  | -0.0489 | 0.0493 | 8.65E-05 | 32.51 |
| rs11981973 | G | A | 0.0613 | 0.0098 | 4.72E-10 |  | 0.1420 | 0.0155 | 1.03E-04 | 38.79 |
| rs1228509 | C | A | 0.0471 | 0.0081 | 6.41E-09 |  | 0.3355 | 0.0123 | 8.97E-05 | 33.71 |
| rs13114985 | G | T | 0.0457 | 0.0081 | 2.01E-08 |  | -0.1532 | 0.0121 | 8.38E-05 | 31.48 |
| rs140896965 | T | C | -0.1125 | 0.0185 | 1.11E-09 |  | 0.5155 | 0.0602 | 9.88E-05 | 37.13 |
| rs2016950 | T | C | -0.0586 | 0.0107 | 4.13E-08 |  | -0.5168 | 0.0167 | 8.01E-05 | 30.09 |
| rs2370982 | T | C | 0.0515 | 0.0089 | 7.97E-09 |  | -0.0718 | 0.0142 | 8.86E-05 | 33.28 |
| rs59333125 | C | A | -0.0816 | 0.0144 | 1.32E-08 |  | -0.0931 | 0.0237 | 8.60E-05 | 32.30 |
| rs60700772 | C | T | 0.0517 | 0.0092 | 2.20E-08 |  | 0.4739 | 0.0142 | 8.33E-05 | 31.31 |
| rs61873510 | T | G | 0.0464 | 0.0084 | 3.28E-08 |  | 0.2800 | 0.0129 | 8.13E-05 | 30.53 |
| rs6484367 | A | G | 0.0468 | 0.0077 | 1.13E-09 |  | 0.2711 | 0.0118 | 9.87E-05 | 37.09 |
| rs679880 | A | G | 0.0495 | 0.0089 | 2.53E-08 |  | 0.4178 | 0.0145 | 8.26E-05 | 31.04 |
| rs76229479 | C | A | -0.0780 | 0.0131 | 2.64E-09 |  | -0.0128 | 0.0184 | 9.43E-05 | 35.44 |
| **IL-13** |  |  |  |  |  |  |  |  |  |  |
| rs10507084 | T | C | 0.0647 | 0.0100 | 8.23E-11 |  | 0.1390 | 0.0251 | 1.12E-04 | 42.20 |
| rs10986730 | T | C | -0.0468 | 0.0077 | 1.16E-09 |  | 0.1731 | 0.0130 | 9.86E-05 | 37.03 |
| rs11075985 | A | C | 0.0821 | 0.0077 | 2.15E-26 |  | 0.0622 | 0.0131 | 3.01E-04 | 113.01 |
| rs113955098 | A | G | -0.0994 | 0.0158 | 3.38E-10 |  | -0.8519 | 0.0453 | 1.05E-04 | 39.44 |
| rs114106239 | T | C | -0.1206 | 0.0212 | 1.19E-08 |  | -0.0506 | 0.0542 | 8.65E-05 | 32.51 |
| rs11981973 | G | A | 0.0613 | 0.0098 | 4.72E-10 |  | -0.1925 | 0.0172 | 1.03E-04 | 38.79 |
| rs1228509 | C | A | 0.0471 | 0.0081 | 6.41E-09 |  | -0.0064 | 0.0140 | 8.97E-05 | 33.71 |
| rs13114985 | G | T | 0.0457 | 0.0081 | 2.01E-08 |  | 0.4225 | 0.0137 | 8.38E-05 | 31.48 |
| rs140896965 | T | C | -0.1125 | 0.0185 | 1.11E-09 |  | 0.5341 | 0.0614 | 9.88E-05 | 37.13 |
| rs2016950 | T | C | -0.0586 | 0.0107 | 4.13E-08 |  | 0.3803 | 0.0186 | 8.01E-05 | 30.09 |
| rs2370982 | T | C | 0.0515 | 0.0089 | 7.97E-09 |  | -0.0990 | 0.0156 | 8.86E-05 | 33.28 |
| rs59333125 | C | A | -0.0816 | 0.0144 | 1.32E-08 |  | 0.5148 | 0.0269 | 8.60E-05 | 32.30 |
| rs60700772 | C | T | 0.0517 | 0.0092 | 2.20E-08 |  | -0.3366 | 0.0157 | 8.33E-05 | 31.31 |
| rs61873510 | T | G | 0.0464 | 0.0084 | 3.28E-08 |  | -0.1723 | 0.0148 | 8.13E-05 | 30.53 |
| rs6484367 | A | G | 0.0468 | 0.0077 | 1.13E-09 |  | -0.2668 | 0.0133 | 9.87E-05 | 37.09 |
| rs679880 | A | G | 0.0495 | 0.0089 | 2.53E-08 |  | 0.0686 | 0.0163 | 8.26E-05 | 31.04 |
| rs76229479 | C | A | -0.0780 | 0.0131 | 2.64E-09 |  | 0.8257 | 0.0202 | 9.43E-05 | 35.44 |
| **IL-15RA** |  |  |  |  |  |  |  |  |  |  |
| rs10507084 | T | C | 0.0647 | 0.0100 | 8.23E-11 |  | 0.5220 | 0.0250 | 1.12E-04 | 42.20 |
| rs10986730 | T | C | -0.0468 | 0.0077 | 1.16E-09 |  | -0.4423 | 0.0126 | 9.86E-05 | 37.03 |
| rs11075985 | A | C | 0.0821 | 0.0077 | 2.15E-26 |  | 0.0792 | 0.0126 | 3.01E-04 | 113.01 |
| rs113955098 | A | G | -0.0994 | 0.0158 | 3.38E-10 |  | 0.7111 | 0.0430 | 1.05E-04 | 39.44 |
| rs114106239 | T | C | -0.1206 | 0.0212 | 1.19E-08 |  | -0.2115 | 0.0543 | 8.65E-05 | 32.51 |
| rs11981973 | G | A | 0.0613 | 0.0098 | 4.72E-10 |  | 0.2758 | 0.0165 | 1.03E-04 | 38.79 |
| rs1228509 | C | A | 0.0471 | 0.0081 | 6.41E-09 |  | 0.0849 | 0.0139 | 8.97E-05 | 33.71 |
| rs13114985 | G | T | 0.0457 | 0.0081 | 2.01E-08 |  | -0.0109 | 0.0137 | 8.38E-05 | 31.48 |
| rs140896965 | T | C | -0.1125 | 0.0185 | 1.11E-09 |  | -0.1235 | 0.0629 | 9.88E-05 | 37.13 |
| rs2016950 | T | C | -0.0586 | 0.0107 | 4.13E-08 |  | -0.2558 | 0.0179 | 8.01E-05 | 30.09 |
| rs2370982 | T | C | 0.0515 | 0.0089 | 7.97E-09 |  | 0.0233 | 0.0150 | 8.86E-05 | 33.28 |
| rs59333125 | C | A | -0.0816 | 0.0144 | 1.32E-08 |  | -0.1409 | 0.0270 | 8.60E-05 | 32.30 |
| rs60700772 | C | T | 0.0517 | 0.0092 | 2.20E-08 |  | -0.2824 | 0.0151 | 8.33E-05 | 31.31 |
| rs61873510 | T | G | 0.0464 | 0.0084 | 3.28E-08 |  | -0.0797 | 0.0147 | 8.13E-05 | 30.53 |
| rs6484367 | A | G | 0.0468 | 0.0077 | 1.13E-09 |  | 0.3181 | 0.0133 | 9.87E-05 | 37.09 |
| rs679880 | A | G | 0.0495 | 0.0089 | 2.53E-08 |  | 0.4178 | 0.0158 | 8.26E-05 | 31.04 |
| rs76229479 | C | A | -0.0780 | 0.0131 | 2.64E-09 |  | 0.0885 | 0.0194 | 9.43E-05 | 35.44 |
| **IL-17A** |  |  |  |  |  |  |  |  |  |  |
| rs10507084 | T | C | 0.0647 | 0.0100 | 8.23E-11 |  | 0.2672 | 0.0250 | 1.12E-04 | 42.20 |
| rs10986730 | T | C | -0.0468 | 0.0077 | 1.16E-09 |  | -0.1645 | 0.0130 | 9.86E-05 | 37.03 |
| rs113955098 | A | G | -0.0994 | 0.0158 | 3.38E-10 |  | -0.0925 | 0.0452 | 1.05E-04 | 39.44 |
| rs114106239 | T | C | -0.1206 | 0.0212 | 1.19E-08 |  | -0.0406 | 0.0543 | 8.65E-05 | 32.51 |
| rs11981973 | G | A | 0.0613 | 0.0098 | 4.72E-10 |  | -0.1697 | 0.0172 | 1.03E-04 | 38.79 |
| rs1228509 | C | A | 0.0471 | 0.0081 | 6.41E-09 |  | 0.3801 | 0.0140 | 8.97E-05 | 33.71 |
| rs13114985 | G | T | 0.0457 | 0.0081 | 2.01E-08 |  | 0.2977 | 0.0137 | 8.38E-05 | 31.48 |
| rs140896965 | T | C | -0.1125 | 0.0185 | 1.11E-09 |  | -0.6808 | 0.0619 | 9.88E-05 | 37.13 |
| rs59333125 | C | A | -0.0816 | 0.0144 | 1.32E-08 |  | -0.0208 | 0.0270 | 8.60E-05 | 32.30 |
| rs60700772 | C | T | 0.0517 | 0.0092 | 2.20E-08 |  | -0.0039 | 0.0157 | 8.33E-05 | 31.31 |
| rs61873510 | T | G | 0.0464 | 0.0084 | 3.28E-08 |  | -0.0345 | 0.0147 | 8.13E-05 | 30.53 |
| rs6484367 | A | G | 0.0468 | 0.0077 | 1.13E-09 |  | -0.0384 | 0.0133 | 9.87E-05 | 37.09 |
| rs679880 | A | G | 0.0495 | 0.0089 | 2.53E-08 |  | 0.1574 | 0.0164 | 8.26E-05 | 31.04 |
| rs76229479 | C | A | -0.0780 | 0.0131 | 2.64E-09 |  | 0.2167 | 0.0202 | 9.43E-05 | 35.44 |
| **IL-17C** |  |  |  |  |  |  |  |  |  |  |
| rs10507084 | T | C | 0.0647 | 0.0100 | 8.23E-11 |  | -0.5406 | 0.0250 | 1.12E-04 | 42.20 |
| rs11075985 | A | C | 0.0821 | 0.0077 | 2.15E-26 |  | 0.1694 | 0.0130 | 3.01E-04 | 113.01 |
| rs113955098 | A | G | -0.0994 | 0.0158 | 3.38E-10 |  | 0.0211 | 0.0450 | 1.05E-04 | 39.44 |
| rs114106239 | T | C | -0.1206 | 0.0212 | 1.19E-08 |  | -0.0357 | 0.0543 | 8.65E-05 | 32.51 |
| rs11981973 | G | A | 0.0613 | 0.0098 | 4.72E-10 |  | -0.1077 | 0.0171 | 1.03E-04 | 38.79 |
| rs1228509 | C | A | 0.0471 | 0.0081 | 6.41E-09 |  | 0.3992 | 0.0139 | 8.97E-05 | 33.71 |
| rs13114985 | G | T | 0.0457 | 0.0081 | 2.01E-08 |  | 0.2211 | 0.0137 | 8.38E-05 | 31.48 |
| rs140896965 | T | C | -0.1125 | 0.0185 | 1.11E-09 |  | 0.5039 | 0.0625 | 9.88E-05 | 37.13 |
| rs2016950 | T | C | -0.0586 | 0.0107 | 4.13E-08 |  | 0.3189 | 0.0185 | 8.01E-05 | 30.09 |
| rs2370982 | T | C | 0.0515 | 0.0089 | 7.97E-09 |  | 0.2562 | 0.0156 | 8.86E-05 | 33.28 |
| rs59333125 | C | A | -0.0816 | 0.0144 | 1.32E-08 |  | -0.3064 | 0.0270 | 8.60E-05 | 32.30 |
| rs60700772 | C | T | 0.0517 | 0.0092 | 2.20E-08 |  | -0.0832 | 0.0157 | 8.33E-05 | 31.31 |
| rs61873510 | T | G | 0.0464 | 0.0084 | 3.28E-08 |  | 0.1615 | 0.0147 | 8.13E-05 | 30.53 |
| rs6484367 | A | G | 0.0468 | 0.0077 | 1.13E-09 |  | 0.3309 | 0.0133 | 9.87E-05 | 37.09 |
| rs679880 | A | G | 0.0495 | 0.0089 | 2.53E-08 |  | 0.3088 | 0.0163 | 8.26E-05 | 31.04 |
| **IL-18R1** |  |  |  |  |  |  |  |  |  |  |
| rs10507084 | T | C | 0.0647 | 0.0100 | 8.23E-11 |  | 0.3398 | 0.0252 | 1.12E-04 | 42.20 |
| rs10986730 | T | C | -0.0468 | 0.0077 | 1.16E-09 |  | -0.3013 | 0.0117 | 9.86E-05 | 37.03 |
| rs11075985 | A | C | 0.0821 | 0.0077 | 2.15E-26 |  | 0.3205 | 0.0117 | 3.01E-04 | 113.01 |
| rs113955098 | A | G | -0.0994 | 0.0158 | 3.38E-10 |  | 0.0915 | 0.0426 | 1.05E-04 | 39.44 |
| rs114106239 | T | C | -0.1206 | 0.0212 | 1.19E-08 |  | 0.2571 | 0.0495 | 8.65E-05 | 32.51 |
| rs11981973 | G | A | 0.0613 | 0.0098 | 4.72E-10 |  | 0.3394 | 0.0154 | 1.03E-04 | 38.79 |
| rs1228509 | C | A | 0.0471 | 0.0081 | 6.41E-09 |  | 0.1189 | 0.0124 | 8.97E-05 | 33.71 |
| rs13114985 | G | T | 0.0457 | 0.0081 | 2.01E-08 |  | -0.3853 | 0.0122 | 8.38E-05 | 31.48 |
| rs140896965 | T | C | -0.1125 | 0.0185 | 1.11E-09 |  | -0.0800 | 0.0602 | 9.88E-05 | 37.13 |
| rs2016950 | T | C | -0.0586 | 0.0107 | 4.13E-08 |  | 0.0119 | 0.0166 | 8.01E-05 | 30.09 |
| rs2370982 | T | C | 0.0515 | 0.0089 | 7.97E-09 |  | 0.0252 | 0.0141 | 8.86E-05 | 33.28 |
| rs59333125 | C | A | -0.0816 | 0.0144 | 1.32E-08 |  | -0.2733 | 0.0239 | 8.60E-05 | 32.30 |
| rs60700772 | C | T | 0.0517 | 0.0092 | 2.20E-08 |  | -0.1509 | 0.0141 | 8.33E-05 | 31.31 |
| rs61873510 | T | G | 0.0464 | 0.0084 | 3.28E-08 |  | 0.1551 | 0.0130 | 8.13E-05 | 30.53 |
| rs6484367 | A | G | 0.0468 | 0.0077 | 1.13E-09 |  | 0.0491 | 0.0119 | 9.87E-05 | 37.09 |
| rs679880 | A | G | 0.0495 | 0.0089 | 2.53E-08 |  | 0.2402 | 0.0145 | 8.26E-05 | 31.04 |
| **IL-18** |  |  |  |  |  |  |  |  |  |  |
| rs10507084 | T | C | 0.0647 | 0.0100 | 8.23E-11 |  | -0.0216 | 0.0252 | 1.12E-04 | 42.20 |
| rs113955098 | A | G | -0.0994 | 0.0158 | 3.38E-10 |  | 0.4405 | 0.0427 | 1.05E-04 | 39.44 |
| rs114106239 | T | C | -0.1206 | 0.0212 | 1.19E-08 |  | 0.6850 | 0.0496 | 8.65E-05 | 32.51 |
| rs11981973 | G | A | 0.0613 | 0.0098 | 4.72E-10 |  | 0.3427 | 0.0155 | 1.03E-04 | 38.79 |
| rs1228509 | C | A | 0.0471 | 0.0081 | 6.41E-09 |  | 0.1805 | 0.0124 | 8.97E-05 | 33.71 |
| rs140896965 | T | C | -0.1125 | 0.0185 | 1.11E-09 |  | 0.2595 | 0.0601 | 9.88E-05 | 37.13 |
| rs2370982 | T | C | 0.0515 | 0.0089 | 7.97E-09 |  | 0.0039 | 0.0142 | 8.86E-05 | 33.28 |
| rs60700772 | C | T | 0.0517 | 0.0092 | 2.20E-08 |  | -0.0290 | 0.0142 | 8.33E-05 | 31.31 |
| rs6484367 | A | G | 0.0468 | 0.0077 | 1.13E-09 |  | 0.0811 | 0.0118 | 9.87E-05 | 37.09 |
| rs679880 | A | G | 0.0495 | 0.0089 | 2.53E-08 |  | 0.0283 | 0.0145 | 8.26E-05 | 31.04 |
| rs76229479 | C | A | -0.0780 | 0.0131 | 2.64E-09 |  | 0.2795 | 0.0183 | 9.43E-05 | 35.44 |
| **IL-20RA** |  |  |  |  |  |  |  |  |  |  |
| rs10507084 | T | C | 0.0647 | 0.0100 | 8.23E-11 |  | 0.3290 | 0.0252 | 1.12E-04 | 42.20 |
| rs10986730 | T | C | -0.0468 | 0.0077 | 1.16E-09 |  | -0.2222 | 0.0131 | 9.86E-05 | 37.03 |
| rs11075985 | A | C | 0.0821 | 0.0077 | 2.15E-26 |  | -0.0475 | 0.0132 | 3.01E-04 | 113.01 |
| rs113955098 | A | G | -0.0994 | 0.0158 | 3.38E-10 |  | 0.3188 | 0.0456 | 1.05E-04 | 39.44 |
| rs114106239 | T | C | -0.1206 | 0.0212 | 1.19E-08 |  | 0.1750 | 0.0544 | 8.65E-05 | 32.51 |
| rs11981973 | G | A | 0.0613 | 0.0098 | 4.72E-10 |  | 0.1289 | 0.0173 | 1.03E-04 | 38.79 |
| rs1228509 | C | A | 0.0471 | 0.0081 | 6.41E-09 |  | 0.0828 | 0.0140 | 8.97E-05 | 33.71 |
| rs13114985 | G | T | 0.0457 | 0.0081 | 2.01E-08 |  | 0.2058 | 0.0137 | 8.38E-05 | 31.48 |
| rs140896965 | T | C | -0.1125 | 0.0185 | 1.11E-09 |  | -0.0622 | 0.0633 | 9.88E-05 | 37.13 |
| rs2016950 | T | C | -0.0586 | 0.0107 | 4.13E-08 |  | -0.4076 | 0.0187 | 8.01E-05 | 30.09 |
| rs2370982 | T | C | 0.0515 | 0.0089 | 7.97E-09 |  | -0.0272 | 0.0157 | 8.86E-05 | 33.28 |
| rs59333125 | C | A | -0.0816 | 0.0144 | 1.32E-08 |  | 0.3701 | 0.0271 | 8.60E-05 | 32.30 |
| rs60700772 | C | T | 0.0517 | 0.0092 | 2.20E-08 |  | -0.2437 | 0.0158 | 8.33E-05 | 31.31 |
| rs61873510 | T | G | 0.0464 | 0.0084 | 3.28E-08 |  | 0.3769 | 0.0148 | 8.13E-05 | 30.53 |
| rs6484367 | A | G | 0.0468 | 0.0077 | 1.13E-09 |  | -0.2049 | 0.0134 | 9.87E-05 | 37.09 |
| rs679880 | A | G | 0.0495 | 0.0089 | 2.53E-08 |  | -0.1655 | 0.0165 | 8.26E-05 | 31.04 |
| rs76229479 | C | A | -0.0780 | 0.0131 | 2.64E-09 |  | 0.4142 | 0.0204 | 9.43E-05 | 35.44 |
| **IL-20** |  |  |  |  |  |  |  |  |  |  |
| rs10507084 | T | C | 0.0647 | 0.0100 | 8.23E-11 |  | 0.4541 | 0.0252 | 1.12E-04 | 42.20 |
| rs11075985 | A | C | 0.0821 | 0.0077 | 2.15E-26 |  | 0.0037 | 0.0128 | 3.01E-04 | 113.01 |
| rs114106239 | T | C | -0.1206 | 0.0212 | 1.19E-08 |  | -0.1211 | 0.0544 | 8.65E-05 | 32.51 |
| rs1228509 | C | A | 0.0471 | 0.0081 | 6.41E-09 |  | -0.1593 | 0.0140 | 8.97E-05 | 33.71 |
| rs13114985 | G | T | 0.0457 | 0.0081 | 2.01E-08 |  | 0.4225 | 0.0137 | 8.38E-05 | 31.48 |
| rs140896965 | T | C | -0.1125 | 0.0185 | 1.11E-09 |  | -0.1893 | 0.0632 | 9.88E-05 | 37.13 |
| rs2016950 | T | C | -0.0586 | 0.0107 | 4.13E-08 |  | 0.4281 | 0.0182 | 8.01E-05 | 30.09 |
| rs59333125 | C | A | -0.0816 | 0.0144 | 1.32E-08 |  | 0.3040 | 0.0271 | 8.60E-05 | 32.30 |
| rs60700772 | C | T | 0.0517 | 0.0092 | 2.20E-08 |  | -0.0348 | 0.0154 | 8.33E-05 | 31.31 |
| rs61873510 | T | G | 0.0464 | 0.0084 | 3.28E-08 |  | 0.2671 | 0.0148 | 8.13E-05 | 30.53 |
| rs6484367 | A | G | 0.0468 | 0.0077 | 1.13E-09 |  | 0.1174 | 0.0134 | 9.87E-05 | 37.09 |
| **IL-22RA1** |  |  |  |  |  |  |  |  |  |  |
| rs10507084 | T | C | 0.0647 | 0.0100 | 8.23E-11 |  | 0.7012 | 0.0252 | 1.12E-04 | 42.20 |
| rs10986730 | T | C | -0.0468 | 0.0077 | 1.16E-09 |  | 0.3868 | 0.0133 | 9.86E-05 | 37.03 |
| rs11075985 | A | C | 0.0821 | 0.0077 | 2.15E-26 |  | 0.0963 | 0.0133 | 3.01E-04 | 113.01 |
| rs113955098 | A | G | -0.0994 | 0.0158 | 3.38E-10 |  | 0.5713 | 0.0464 | 1.05E-04 | 39.44 |
| rs114106239 | T | C | -0.1206 | 0.0212 | 1.19E-08 |  | 0.2720 | 0.0544 | 8.65E-05 | 32.51 |
| rs11981973 | G | A | 0.0613 | 0.0098 | 4.72E-10 |  | -0.3900 | 0.0175 | 1.03E-04 | 38.79 |
| rs1228509 | C | A | 0.0471 | 0.0081 | 6.41E-09 |  | -0.0998 | 0.0140 | 8.97E-05 | 33.71 |
| rs13114985 | G | T | 0.0457 | 0.0081 | 2.01E-08 |  | 0.0285 | 0.0137 | 8.38E-05 | 31.48 |
| rs140896965 | T | C | -0.1125 | 0.0185 | 1.11E-09 |  | 0.8194 | 0.0610 | 9.88E-05 | 37.13 |
| rs2016950 | T | C | -0.0586 | 0.0107 | 4.13E-08 |  | -0.2524 | 0.0190 | 8.01E-05 | 30.09 |
| rs2370982 | T | C | 0.0515 | 0.0089 | 7.97E-09 |  | 0.1825 | 0.0160 | 8.86E-05 | 33.28 |
| rs59333125 | C | A | -0.0816 | 0.0144 | 1.32E-08 |  | 0.1201 | 0.0271 | 8.60E-05 | 32.30 |
| rs60700772 | C | T | 0.0517 | 0.0092 | 2.20E-08 |  | 0.4178 | 0.0160 | 8.33E-05 | 31.31 |
| rs61873510 | T | G | 0.0464 | 0.0084 | 3.28E-08 |  | 0.2218 | 0.0148 | 8.13E-05 | 30.53 |
| rs6484367 | A | G | 0.0468 | 0.0077 | 1.13E-09 |  | 0.0982 | 0.0134 | 9.87E-05 | 37.09 |
| rs679880 | A | G | 0.0495 | 0.0089 | 2.53E-08 |  | -0.3370 | 0.0167 | 8.26E-05 | 31.04 |
| rs76229479 | C | A | -0.0780 | 0.0131 | 2.64E-09 |  | 0.1539 | 0.0206 | 9.43E-05 | 35.44 |
| **IL-24** |  |  |  |  |  |  |  |  |  |  |
| rs11075985 | A | C | 0.0821 | 0.0077 | 2.15E-26 |  | -0.0463 | 0.0133 | 3.01E-04 | 113.01 |
| rs113955098 | A | G | -0.0994 | 0.0158 | 3.38E-10 |  | -0.6366 | 0.0462 | 1.05E-04 | 39.44 |
| rs114106239 | T | C | -0.1206 | 0.0212 | 1.19E-08 |  | -0.0838 | 0.0544 | 8.65E-05 | 32.51 |
| rs11981973 | G | A | 0.0613 | 0.0098 | 4.72E-10 |  | -0.1485 | 0.0175 | 1.03E-04 | 38.79 |
| rs140896965 | T | C | -0.1125 | 0.0185 | 1.11E-09 |  | -0.1386 | 0.0629 | 9.88E-05 | 37.13 |
| rs2016950 | T | C | -0.0586 | 0.0107 | 4.13E-08 |  | -0.0136 | 0.0189 | 8.01E-05 | 30.09 |
| rs60700772 | C | T | 0.0517 | 0.0092 | 2.20E-08 |  | -0.1431 | 0.0160 | 8.33E-05 | 31.31 |
| rs6484367 | A | G | 0.0468 | 0.0077 | 1.13E-09 |  | -0.4803 | 0.0134 | 9.87E-05 | 37.09 |
| rs679880 | A | G | 0.0495 | 0.0089 | 2.53E-08 |  | -0.3976 | 0.0166 | 8.26E-05 | 31.04 |
| **IL-33** |  |  |  |  |  |  |  |  |  |  |
| rs10507084 | T | C | 0.0647 | 0.0100 | 8.23E-11 |  | 0.4556 | 0.0251 | 1.12E-04 | 42.20 |
| rs10986730 | T | C | -0.0468 | 0.0077 | 1.16E-09 |  | -0.0021 | 0.0129 | 9.86E-05 | 37.03 |
| rs11075985 | A | C | 0.0821 | 0.0077 | 2.15E-26 |  | 0.1438 | 0.0129 | 3.01E-04 | 113.01 |
| rs113955098 | A | G | -0.0994 | 0.0158 | 3.38E-10 |  | 0.2333 | 0.0445 | 1.05E-04 | 39.44 |
| rs13114985 | G | T | 0.0457 | 0.0081 | 2.01E-08 |  | 0.0219 | 0.0137 | 8.38E-05 | 31.48 |
| rs2016950 | T | C | -0.0586 | 0.0107 | 4.13E-08 |  | -0.0307 | 0.0184 | 8.01E-05 | 30.09 |
| rs59333125 | C | A | -0.0816 | 0.0144 | 1.32E-08 |  | 0.1471 | 0.0269 | 8.60E-05 | 32.30 |
| rs6484367 | A | G | 0.0468 | 0.0077 | 1.13E-09 |  | 0.2327 | 0.0133 | 9.87E-05 | 37.09 |
| **CXCL1** |  |  |  |  |  |  |  |  |  |  |
| rs10507084 | T | C | 0.0647 | 0.0100 | 8.23E-11 |  | 0.3336 | 0.0252 | 1.12E-04 | 42.20 |
| rs10986730 | T | C | -0.0468 | 0.0077 | 1.16E-09 |  | 0.0021 | 0.0117 | 9.86E-05 | 37.03 |
| rs113955098 | A | G | -0.0994 | 0.0158 | 3.38E-10 |  | 0.2323 | 0.0429 | 1.05E-04 | 39.44 |
| rs1228509 | C | A | 0.0471 | 0.0081 | 6.41E-09 |  | 0.2102 | 0.0124 | 8.97E-05 | 33.71 |
| rs13114985 | G | T | 0.0457 | 0.0081 | 2.01E-08 |  | 0.1927 | 0.0122 | 8.38E-05 | 31.48 |
| rs140896965 | T | C | -0.1125 | 0.0185 | 1.11E-09 |  | -0.0284 | 0.0598 | 9.88E-05 | 37.13 |
| rs2016950 | T | C | -0.0586 | 0.0107 | 4.13E-08 |  | 0.1910 | 0.0167 | 8.01E-05 | 30.09 |
| rs59333125 | C | A | -0.0816 | 0.0144 | 1.32E-08 |  | 0.2218 | 0.0238 | 8.60E-05 | 32.30 |
| rs61873510 | T | G | 0.0464 | 0.0084 | 3.28E-08 |  | 0.0302 | 0.0130 | 8.13E-05 | 30.53 |
| rs6484367 | A | G | 0.0468 | 0.0077 | 1.13E-09 |  | -0.0363 | 0.0118 | 9.87E-05 | 37.09 |
| rs679880 | A | G | 0.0495 | 0.0089 | 2.53E-08 |  | 0.1110 | 0.0146 | 8.26E-05 | 31.04 |
| rs76229479 | C | A | -0.0780 | 0.0131 | 2.64E-09 |  | -0.0462 | 0.0184 | 9.43E-05 | 35.44 |
| **CXCL5** |  |  |  |  |  |  |  |  |  |  |
| rs10507084 | T | C | 0.0647 | 0.0100 | 8.23E-11 |  | 0.4834 | 0.0252 | 1.12E-04 | 42.20 |
| rs10986730 | T | C | -0.0468 | 0.0077 | 1.16E-09 |  | -0.2607 | 0.0118 | 9.86E-05 | 37.03 |
| rs113955098 | A | G | -0.0994 | 0.0158 | 3.38E-10 |  | -0.0614 | 0.0433 | 1.05E-04 | 39.44 |
| rs114106239 | T | C | -0.1206 | 0.0212 | 1.19E-08 |  | -0.4752 | 0.0495 | 8.65E-05 | 32.51 |
| rs11981973 | G | A | 0.0613 | 0.0098 | 4.72E-10 |  | -0.0767 | 0.0156 | 1.03E-04 | 38.79 |
| rs1228509 | C | A | 0.0471 | 0.0081 | 6.41E-09 |  | 0.3206 | 0.0123 | 8.97E-05 | 33.71 |
| rs13114985 | G | T | 0.0457 | 0.0081 | 2.01E-08 |  | 0.2145 | 0.0122 | 8.38E-05 | 31.48 |
| rs140896965 | T | C | -0.1125 | 0.0185 | 1.11E-09 |  | -0.1875 | 0.0605 | 9.88E-05 | 37.13 |
| rs2016950 | T | C | -0.0586 | 0.0107 | 4.13E-08 |  | -0.1381 | 0.0168 | 8.01E-05 | 30.09 |
| rs2370982 | T | C | 0.0515 | 0.0089 | 7.97E-09 |  | -0.3883 | 0.0143 | 8.86E-05 | 33.28 |
| rs59333125 | C | A | -0.0816 | 0.0144 | 1.32E-08 |  | 0.0147 | 0.0239 | 8.60E-05 | 32.30 |
| rs60700772 | C | T | 0.0517 | 0.0092 | 2.20E-08 |  | 0.0058 | 0.0143 | 8.33E-05 | 31.31 |
| rs61873510 | T | G | 0.0464 | 0.0084 | 3.28E-08 |  | -0.1292 | 0.0130 | 8.13E-05 | 30.53 |
| rs6484367 | A | G | 0.0468 | 0.0077 | 1.13E-09 |  | -0.0192 | 0.0118 | 9.87E-05 | 37.09 |
| rs679880 | A | G | 0.0495 | 0.0089 | 2.53E-08 |  | 0.3128 | 0.0146 | 8.26E-05 | 31.04 |
| rs76229479 | C | A | -0.0780 | 0.0131 | 2.64E-09 |  | -0.1308 | 0.0185 | 9.43E-05 | 35.44 |
| **CXCL6** |  |  |  |  |  |  |  |  |  |  |
| rs10986730 | T | C | -0.0468 | 0.0077 | 1.16E-09 |  | -0.0171 | 0.0118 | 9.86E-05 | 37.03 |
| rs114106239 | T | C | -0.1206 | 0.0212 | 1.19E-08 |  | -0.1484 | 0.0496 | 8.65E-05 | 32.51 |
| rs11981973 | G | A | 0.0613 | 0.0098 | 4.72E-10 |  | -0.3182 | 0.0156 | 1.03E-04 | 38.79 |
| rs13114985 | G | T | 0.0457 | 0.0081 | 2.01E-08 |  | -0.2518 | 0.0122 | 8.38E-05 | 31.48 |
| rs140896965 | T | C | -0.1125 | 0.0185 | 1.11E-09 |  | 0.4239 | 0.0608 | 9.88E-05 | 37.13 |
| rs2016950 | T | C | -0.0586 | 0.0107 | 4.13E-08 |  | 0.0307 | 0.0167 | 8.01E-05 | 30.09 |
| rs2370982 | T | C | 0.0515 | 0.0089 | 7.97E-09 |  | -0.2660 | 0.0143 | 8.86E-05 | 33.28 |
| rs59333125 | C | A | -0.0816 | 0.0144 | 1.32E-08 |  | 0.0012 | 0.0239 | 8.60E-05 | 32.30 |
| rs60700772 | C | T | 0.0517 | 0.0092 | 2.20E-08 |  | -0.1412 | 0.0143 | 8.33E-05 | 31.31 |
| rs61873510 | T | G | 0.0464 | 0.0084 | 3.28E-08 |  | -0.2864 | 0.0131 | 8.13E-05 | 30.53 |
| rs76229479 | C | A | -0.0780 | 0.0131 | 2.64E-09 |  | 0.0910 | 0.0185 | 9.43E-05 | 35.44 |
| **CXCL9** |  |  |  |  |  |  |  |  |  |  |
| rs10507084 | T | C | 0.0647 | 0.0100 | 8.23E-11 |  | 0.1112 | 0.0245 | 1.12E-04 | 42.20 |
| rs10986730 | T | C | -0.0468 | 0.0077 | 1.16E-09 |  | -0.5492 | 0.0114 | 9.86E-05 | 37.03 |
| rs11075985 | A | C | 0.0821 | 0.0077 | 2.15E-26 |  | -0.0646 | 0.0114 | 3.01E-04 | 113.01 |
| rs113955098 | A | G | -0.0994 | 0.0158 | 3.38E-10 |  | -0.2384 | 0.0418 | 1.05E-04 | 39.44 |
| rs114106239 | T | C | -0.1206 | 0.0212 | 1.19E-08 |  | 0.1692 | 0.0487 | 8.65E-05 | 32.51 |
| rs11981973 | G | A | 0.0613 | 0.0098 | 4.72E-10 |  | -0.1779 | 0.0151 | 1.03E-04 | 38.79 |
| rs1228509 | C | A | 0.0471 | 0.0081 | 6.41E-09 |  | -0.0382 | 0.0119 | 8.97E-05 | 33.71 |
| rs13114985 | G | T | 0.0457 | 0.0081 | 2.01E-08 |  | -0.3722 | 0.0117 | 8.38E-05 | 31.48 |
| rs140896965 | T | C | -0.1125 | 0.0185 | 1.11E-09 |  | -0.1689 | 0.0554 | 9.88E-05 | 37.13 |
| rs2016950 | T | C | -0.0586 | 0.0107 | 4.13E-08 |  | -0.3718 | 0.0161 | 8.01E-05 | 30.09 |
| rs2370982 | T | C | 0.0515 | 0.0089 | 7.97E-09 |  | -0.2058 | 0.0138 | 8.86E-05 | 33.28 |
| rs59333125 | C | A | -0.0816 | 0.0144 | 1.32E-08 |  | -0.1091 | 0.0227 | 8.60E-05 | 32.30 |
| rs60700772 | C | T | 0.0517 | 0.0092 | 2.20E-08 |  | 0.0251 | 0.0138 | 8.33E-05 | 31.31 |
| rs61873510 | T | G | 0.0464 | 0.0084 | 3.28E-08 |  | -0.0043 | 0.0125 | 8.13E-05 | 30.53 |
| rs6484367 | A | G | 0.0468 | 0.0077 | 1.13E-09 |  | -0.0555 | 0.0114 | 9.87E-05 | 37.09 |
| rs679880 | A | G | 0.0495 | 0.0089 | 2.53E-08 |  | 0.4259 | 0.0140 | 8.26E-05 | 31.04 |
| rs76229479 | C | A | -0.0780 | 0.0131 | 2.64E-09 |  | -0.2000 | 0.0179 | 9.43E-05 | 35.44 |
| **CXCL10** |  |  |  |  |  |  |  |  |  |  |
| rs10507084 | T | C | 0.0647 | 0.0100 | 8.23E-11 |  | -0.0216 | 0.0250 | 1.12E-04 | 42.20 |
| rs10986730 | T | C | -0.0468 | 0.0077 | 1.16E-09 |  | -0.2714 | 0.0117 | 9.86E-05 | 37.03 |
| rs11075985 | A | C | 0.0821 | 0.0077 | 2.15E-26 |  | 0.0110 | 0.0118 | 3.01E-04 | 113.01 |
| rs113955098 | A | G | -0.0994 | 0.0158 | 3.38E-10 |  | -0.2333 | 0.0430 | 1.05E-04 | 39.44 |
| rs11981973 | G | A | 0.0613 | 0.0098 | 4.72E-10 |  | 0.0457 | 0.0155 | 1.03E-04 | 38.79 |
| rs13114985 | G | T | 0.0457 | 0.0081 | 2.01E-08 |  | -0.1292 | 0.0121 | 8.38E-05 | 31.48 |
| rs140896965 | T | C | -0.1125 | 0.0185 | 1.11E-09 |  | -0.0853 | 0.0588 | 9.88E-05 | 37.13 |
| rs2370982 | T | C | 0.0515 | 0.0089 | 7.97E-09 |  | -0.0660 | 0.0142 | 8.86E-05 | 33.28 |
| rs59333125 | C | A | -0.0816 | 0.0144 | 1.32E-08 |  | -0.2635 | 0.0236 | 8.60E-05 | 32.30 |
| rs61873510 | T | G | 0.0464 | 0.0084 | 3.28E-08 |  | -0.1917 | 0.0129 | 8.13E-05 | 30.53 |
| rs76229479 | C | A | -0.0780 | 0.0131 | 2.64E-09 |  | -0.1064 | 0.0184 | 9.43E-05 | 35.44 |
| **CXCL11** |  |  |  |  |  |  |  |  |  |  |
| rs10507084 | T | C | 0.0647 | 0.0100 | 8.23E-11 |  | 0.1266 | 0.0252 | 1.12E-04 | 42.20 |
| rs11075985 | A | C | 0.0821 | 0.0077 | 2.15E-26 |  | 0.1085 | 0.0118 | 3.01E-04 | 113.01 |
| rs113955098 | A | G | -0.0994 | 0.0158 | 3.38E-10 |  | -0.0312 | 0.0433 | 1.05E-04 | 39.44 |
| rs1228509 | C | A | 0.0471 | 0.0081 | 6.41E-09 |  | -0.0319 | 0.0123 | 8.97E-05 | 33.71 |
| rs140896965 | T | C | -0.1125 | 0.0185 | 1.11E-09 |  | 0.6061 | 0.0599 | 9.88E-05 | 37.13 |
| rs59333125 | C | A | -0.0816 | 0.0144 | 1.32E-08 |  | -0.0135 | 0.0238 | 8.60E-05 | 32.30 |
| rs60700772 | C | T | 0.0517 | 0.0092 | 2.20E-08 |  | -0.0155 | 0.0143 | 8.33E-05 | 31.31 |
| rs61873510 | T | G | 0.0464 | 0.0084 | 3.28E-08 |  | -0.0151 | 0.0130 | 8.13E-05 | 30.53 |
| rs6484367 | A | G | 0.0468 | 0.0077 | 1.13E-09 |  | 0.1537 | 0.0118 | 9.87E-05 | 37.09 |
| rs679880 | A | G | 0.0495 | 0.0089 | 2.53E-08 |  | 0.5772 | 0.0146 | 8.26E-05 | 31.04 |
| rs76229479 | C | A | -0.0780 | 0.0131 | 2.64E-09 |  | 0.1051 | 0.0185 | 9.43E-05 | 35.44 |
| **CCL2** |  |  |  |  |  |  |  |  |  |  |
| rs10507084 | T | C | 0.0647 | 0.0100 | 8.23E-11 |  | -0.1730 | 0.0249 | 1.12E-04 | 42.20 |
| rs10986730 | T | C | -0.0468 | 0.0077 | 1.16E-09 |  | -0.2863 | 0.0117 | 9.86E-05 | 37.03 |
| rs113955098 | A | G | -0.0994 | 0.0158 | 3.38E-10 |  | 0.1529 | 0.0427 | 1.05E-04 | 39.44 |
| rs114106239 | T | C | -0.1206 | 0.0212 | 1.19E-08 |  | 0.2206 | 0.0497 | 8.65E-05 | 32.51 |
| rs11981973 | G | A | 0.0613 | 0.0098 | 4.72E-10 |  | -0.2643 | 0.0155 | 1.03E-04 | 38.79 |
| rs1228509 | C | A | 0.0471 | 0.0081 | 6.41E-09 |  | -0.2867 | 0.0123 | 8.97E-05 | 33.71 |
| rs13114985 | G | T | 0.0457 | 0.0081 | 2.01E-08 |  | 0.0241 | 0.0121 | 8.38E-05 | 31.48 |
| rs140896965 | T | C | -0.1125 | 0.0185 | 1.11E-09 |  | 0.1724 | 0.0586 | 9.88E-05 | 37.13 |
| rs59333125 | C | A | -0.0816 | 0.0144 | 1.32E-08 |  | 0.1189 | 0.0236 | 8.60E-05 | 32.30 |
| rs60700772 | C | T | 0.0517 | 0.0092 | 2.20E-08 |  | -0.2244 | 0.0142 | 8.33E-05 | 31.31 |
| rs61873510 | T | G | 0.0464 | 0.0084 | 3.28E-08 |  | -0.2864 | 0.0130 | 8.13E-05 | 30.53 |
| rs6484367 | A | G | 0.0468 | 0.0077 | 1.13E-09 |  | -0.0576 | 0.0118 | 9.87E-05 | 37.09 |
| rs76229479 | C | A | -0.0780 | 0.0131 | 2.64E-09 |  | 0.0244 | 0.0183 | 9.43E-05 | 35.44 |
| **CCL4** |  |  |  |  |  |  |  |  |  |  |
| rs10507084 | T | C | 0.0647 | 0.0100 | 8.23E-11 |  | 0.3877 | 0.0252 | 1.12E-04 | 42.20 |
| rs10986730 | T | C | -0.0468 | 0.0077 | 1.16E-09 |  | 0.2393 | 0.0118 | 9.86E-05 | 37.03 |
| rs114106239 | T | C | -0.1206 | 0.0212 | 1.19E-08 |  | -0.0224 | 0.0496 | 8.65E-05 | 32.51 |
| rs1228509 | C | A | 0.0471 | 0.0081 | 6.41E-09 |  | 0.0531 | 0.0124 | 8.97E-05 | 33.71 |
| rs13114985 | G | T | 0.0457 | 0.0081 | 2.01E-08 |  | -0.0701 | 0.0122 | 8.38E-05 | 31.48 |
| rs140896965 | T | C | -0.1125 | 0.0185 | 1.11E-09 |  | -0.2071 | 0.0608 | 9.88E-05 | 37.13 |
| rs2016950 | T | C | -0.0586 | 0.0107 | 4.13E-08 |  | -0.1160 | 0.0168 | 8.01E-05 | 30.09 |
| rs2370982 | T | C | 0.0515 | 0.0089 | 7.97E-09 |  | 0.0835 | 0.0143 | 8.86E-05 | 33.28 |
| rs59333125 | C | A | -0.0816 | 0.0144 | 1.32E-08 |  | -0.0527 | 0.0239 | 8.60E-05 | 32.30 |
| rs6484367 | A | G | 0.0468 | 0.0077 | 1.13E-09 |  | 0.1537 | 0.0119 | 9.87E-05 | 37.09 |
| rs76229479 | C | A | -0.0780 | 0.0131 | 2.64E-09 |  | 0.1154 | 0.0185 | 9.43E-05 | 35.44 |
| **CCL7** |  |  |  |  |  |  |  |  |  |  |
| rs10507084 | T | C | 0.0647 | 0.0100 | 8.23E-11 |  | 0.1653 | 0.0247 | 1.12E-04 | 42.20 |
| rs10986730 | T | C | -0.0468 | 0.0077 | 1.16E-09 |  | -0.3504 | 0.0132 | 9.86E-05 | 37.03 |
| rs11075985 | A | C | 0.0821 | 0.0077 | 2.15E-26 |  | 0.1499 | 0.0133 | 3.01E-04 | 113.01 |
| rs113955098 | A | G | -0.0994 | 0.0158 | 3.38E-10 |  | 0.2454 | 0.0457 | 1.05E-04 | 39.44 |
| rs114106239 | T | C | -0.1206 | 0.0212 | 1.19E-08 |  | 0.4047 | 0.0542 | 8.65E-05 | 32.51 |
| rs11981973 | G | A | 0.0613 | 0.0098 | 4.72E-10 |  | -0.1485 | 0.0174 | 1.03E-04 | 38.79 |
| rs1228509 | C | A | 0.0471 | 0.0081 | 6.41E-09 |  | -0.1784 | 0.0138 | 8.97E-05 | 33.71 |
| rs13114985 | G | T | 0.0457 | 0.0081 | 2.01E-08 |  | 0.1467 | 0.0136 | 8.38E-05 | 31.48 |
| rs140896965 | T | C | -0.1125 | 0.0185 | 1.11E-09 |  | 0.1937 | 0.0605 | 9.88E-05 | 37.13 |
| rs2016950 | T | C | -0.0586 | 0.0107 | 4.13E-08 |  | -0.1126 | 0.0188 | 8.01E-05 | 30.09 |
| rs2370982 | T | C | 0.0515 | 0.0089 | 7.97E-09 |  | 0.2388 | 0.0159 | 8.86E-05 | 33.28 |
| rs59333125 | C | A | -0.0816 | 0.0144 | 1.32E-08 |  | -0.0245 | 0.0267 | 8.60E-05 | 32.30 |
| rs60700772 | C | T | 0.0517 | 0.0092 | 2.20E-08 |  | 0.1296 | 0.0160 | 8.33E-05 | 31.31 |
| rs61873510 | T | G | 0.0464 | 0.0084 | 3.28E-08 |  | 0.1831 | 0.0146 | 8.13E-05 | 30.53 |
| rs6484367 | A | G | 0.0468 | 0.0077 | 1.13E-09 |  | -0.2007 | 0.0132 | 9.87E-05 | 37.09 |
| rs679880 | A | G | 0.0495 | 0.0089 | 2.53E-08 |  | 0.6398 | 0.0166 | 8.26E-05 | 31.04 |
| rs76229479 | C | A | -0.0780 | 0.0131 | 2.64E-09 |  | 0.2718 | 0.0205 | 9.43E-05 | 35.44 |
| **CCL8** |  |  |  |  |  |  |  |  |  |  |
| rs10507084 | T | C | 0.0647 | 0.0100 | 8.23E-11 |  | 0.0571 | 0.0252 | 1.12E-04 | 42.20 |
| rs10986730 | T | C | -0.0468 | 0.0077 | 1.16E-09 |  | -0.0641 | 0.0118 | 9.86E-05 | 37.03 |
| rs113955098 | A | G | -0.0994 | 0.0158 | 3.38E-10 |  | 0.0322 | 0.0431 | 1.05E-04 | 39.44 |
| rs11981973 | G | A | 0.0613 | 0.0098 | 4.72E-10 |  | 0.0816 | 0.0156 | 1.03E-04 | 38.79 |
| rs13114985 | G | T | 0.0457 | 0.0081 | 2.01E-08 |  | 0.0306 | 0.0122 | 8.38E-05 | 31.48 |
| rs140896965 | T | C | -0.1125 | 0.0185 | 1.11E-09 |  | -0.2551 | 0.0604 | 9.88E-05 | 37.13 |
| rs2370982 | T | C | 0.0515 | 0.0089 | 7.97E-09 |  | 0.1398 | 0.0143 | 8.86E-05 | 33.28 |
| rs59333125 | C | A | -0.0816 | 0.0144 | 1.32E-08 |  | -0.0404 | 0.0239 | 8.60E-05 | 32.30 |
| rs60700772 | C | T | 0.0517 | 0.0092 | 2.20E-08 |  | 0.0658 | 0.0143 | 8.33E-05 | 31.31 |
| rs61873510 | T | G | 0.0464 | 0.0084 | 3.28E-08 |  | 0.0065 | 0.0131 | 8.13E-05 | 30.53 |
| rs6484367 | A | G | 0.0468 | 0.0077 | 1.13E-09 |  | 0.1110 | 0.0119 | 9.87E-05 | 37.09 |
| rs679880 | A | G | 0.0495 | 0.0089 | 2.53E-08 |  | 0.0404 | 0.0146 | 8.26E-05 | 31.04 |
| rs76229479 | C | A | -0.0780 | 0.0131 | 2.64E-09 |  | 0.0705 | 0.0185 | 9.43E-05 | 35.44 |
| **CCL11** |  |  |  |  |  |  |  |  |  |  |
| rs10507084 | T | C | 0.0647 | 0.0100 | 8.23E-11 |  | -0.0124 | 0.0247 | 1.12E-04 | 42.20 |
| rs10986730 | T | C | -0.0468 | 0.0077 | 1.16E-09 |  | -0.4295 | 0.0116 | 9.86E-05 | 37.03 |
| rs11075985 | A | C | 0.0821 | 0.0077 | 2.15E-26 |  | 0.0256 | 0.0116 | 3.01E-04 | 113.01 |
| rs113955098 | A | G | -0.0994 | 0.0158 | 3.38E-10 |  | 0.2142 | 0.0421 | 1.05E-04 | 39.44 |
| rs114106239 | T | C | -0.1206 | 0.0212 | 1.19E-08 |  | 0.2952 | 0.0494 | 8.65E-05 | 32.51 |
| rs11981973 | G | A | 0.0613 | 0.0098 | 4.72E-10 |  | -0.3182 | 0.0154 | 1.03E-04 | 38.79 |
| rs1228509 | C | A | 0.0471 | 0.0081 | 6.41E-09 |  | -0.2038 | 0.0122 | 8.97E-05 | 33.71 |
| rs13114985 | G | T | 0.0457 | 0.0081 | 2.01E-08 |  | -0.3481 | 0.0121 | 8.38E-05 | 31.48 |
| rs140896965 | T | C | -0.1125 | 0.0185 | 1.11E-09 |  | 0.5155 | 0.0574 | 9.88E-05 | 37.13 |
| rs2016950 | T | C | -0.0586 | 0.0107 | 4.13E-08 |  | -0.0273 | 0.0165 | 8.01E-05 | 30.09 |
| rs2370982 | T | C | 0.0515 | 0.0089 | 7.97E-09 |  | -0.0796 | 0.0141 | 8.86E-05 | 33.28 |
| rs59333125 | C | A | -0.0816 | 0.0144 | 1.32E-08 |  | -0.4351 | 0.0235 | 8.60E-05 | 32.30 |
| rs60700772 | C | T | 0.0517 | 0.0092 | 2.20E-08 |  | -0.5204 | 0.0140 | 8.33E-05 | 31.31 |
| rs61873510 | T | G | 0.0464 | 0.0084 | 3.28E-08 |  | -0.0452 | 0.0129 | 8.13E-05 | 30.53 |
| rs6484367 | A | G | 0.0468 | 0.0077 | 1.13E-09 |  | 0.0640 | 0.0117 | 9.87E-05 | 37.09 |
| rs679880 | A | G | 0.0495 | 0.0089 | 2.53E-08 |  | 0.6822 | 0.0144 | 8.26E-05 | 31.04 |
| rs76229479 | C | A | -0.0780 | 0.0131 | 2.64E-09 |  | 0.0308 | 0.0182 | 9.43E-05 | 35.44 |
| **CCL13** |  |  |  |  |  |  |  |  |  |  |
| rs10507084 | T | C | 0.0647 | 0.0100 | 8.23E-11 |  | 0.2904 | 0.0250 | 1.12E-04 | 42.20 |
| rs10986730 | T | C | -0.0468 | 0.0077 | 1.16E-09 |  | -0.0962 | 0.0117 | 9.86E-05 | 37.03 |
| rs11075985 | A | C | 0.0821 | 0.0077 | 2.15E-26 |  | 0.1499 | 0.0117 | 3.01E-04 | 113.01 |
| rs113955098 | A | G | -0.0994 | 0.0158 | 3.38E-10 |  | 0.5381 | 0.0425 | 1.05E-04 | 39.44 |
| rs114106239 | T | C | -0.1206 | 0.0212 | 1.19E-08 |  | 0.5531 | 0.0495 | 8.65E-05 | 32.51 |
| rs11981973 | G | A | 0.0613 | 0.0098 | 4.72E-10 |  | -0.1126 | 0.0155 | 1.03E-04 | 38.79 |
| rs1228509 | C | A | 0.0471 | 0.0081 | 6.41E-09 |  | 0.0913 | 0.0123 | 8.97E-05 | 33.71 |
| rs13114985 | G | T | 0.0457 | 0.0081 | 2.01E-08 |  | 0.0022 | 0.0122 | 8.38E-05 | 31.48 |
| rs140896965 | T | C | -0.1125 | 0.0185 | 1.11E-09 |  | 0.5030 | 0.0593 | 9.88E-05 | 37.13 |
| rs2016950 | T | C | -0.0586 | 0.0107 | 4.13E-08 |  | -0.0119 | 0.0166 | 8.01E-05 | 30.09 |
| rs2370982 | T | C | 0.0515 | 0.0089 | 7.97E-09 |  | -0.1669 | 0.0142 | 8.86E-05 | 33.28 |
| rs59333125 | C | A | -0.0816 | 0.0144 | 1.32E-08 |  | 0.4866 | 0.0238 | 8.60E-05 | 32.30 |
| rs60700772 | C | T | 0.0517 | 0.0092 | 2.20E-08 |  | -0.0503 | 0.0142 | 8.33E-05 | 31.31 |
| rs61873510 | T | G | 0.0464 | 0.0084 | 3.28E-08 |  | -0.2261 | 0.0130 | 8.13E-05 | 30.53 |
| rs6484367 | A | G | 0.0468 | 0.0077 | 1.13E-09 |  | -0.0107 | 0.0118 | 9.87E-05 | 37.09 |
| rs679880 | A | G | 0.0495 | 0.0089 | 2.53E-08 |  | 0.4097 | 0.0145 | 8.26E-05 | 31.04 |
| rs76229479 | C | A | -0.0780 | 0.0131 | 2.64E-09 |  | 0.0308 | 0.0183 | 9.43E-05 | 35.44 |
| **CCL19** |  |  |  |  |  |  |  |  |  |  |
| rs10507084 | T | C | 0.0647 | 0.0100 | 8.23E-11 |  | -0.0772 | 0.0252 | 1.12E-04 | 42.20 |
| rs10986730 | T | C | -0.0468 | 0.0077 | 1.16E-09 |  | -0.3205 | 0.0118 | 9.86E-05 | 37.03 |
| rs11075985 | A | C | 0.0821 | 0.0077 | 2.15E-26 |  | -0.0207 | 0.0119 | 3.01E-04 | 113.01 |
| rs113955098 | A | G | -0.0994 | 0.0158 | 3.38E-10 |  | -0.0060 | 0.0438 | 1.05E-04 | 39.44 |
| rs114106239 | T | C | -0.1206 | 0.0212 | 1.19E-08 |  | 0.2438 | 0.0498 | 8.65E-05 | 32.51 |
| rs11981973 | G | A | 0.0613 | 0.0098 | 4.72E-10 |  | -0.1844 | 0.0157 | 1.03E-04 | 38.79 |
| rs1228509 | C | A | 0.0471 | 0.0081 | 6.41E-09 |  | 0.5011 | 0.0124 | 8.97E-05 | 33.71 |
| rs13114985 | G | T | 0.0457 | 0.0081 | 2.01E-08 |  | 0.1708 | 0.0122 | 8.38E-05 | 31.48 |
| rs140896965 | T | C | -0.1125 | 0.0185 | 1.11E-09 |  | -0.3137 | 0.0602 | 9.88E-05 | 37.13 |
| rs2016950 | T | C | -0.0586 | 0.0107 | 4.13E-08 |  | -0.2149 | 0.0168 | 8.01E-05 | 30.09 |
| rs2370982 | T | C | 0.0515 | 0.0089 | 7.97E-09 |  | -0.3300 | 0.0144 | 8.86E-05 | 33.28 |
| rs59333125 | C | A | -0.0816 | 0.0144 | 1.32E-08 |  | 0.1949 | 0.0239 | 8.60E-05 | 32.30 |
| rs60700772 | C | T | 0.0517 | 0.0092 | 2.20E-08 |  | 0.5184 | 0.0144 | 8.33E-05 | 31.31 |
| rs61873510 | T | G | 0.0464 | 0.0084 | 3.28E-08 |  | 0.1443 | 0.0130 | 8.13E-05 | 30.53 |
| rs6484367 | A | G | 0.0468 | 0.0077 | 1.13E-09 |  | 0.2797 | 0.0119 | 9.87E-05 | 37.09 |
| rs679880 | A | G | 0.0495 | 0.0089 | 2.53E-08 |  | 0.1615 | 0.0147 | 8.26E-05 | 31.04 |
| rs76229479 | C | A | -0.0780 | 0.0131 | 2.64E-09 |  | 0.1462 | 0.0186 | 9.43E-05 | 35.44 |
| **CCL20** |  |  |  |  |  |  |  |  |  |  |
| rs10507084 | T | C | 0.0647 | 0.0100 | 8.23E-11 |  | 0.1421 | 0.0251 | 1.12E-04 | 42.20 |
| rs11075985 | A | C | 0.0821 | 0.0077 | 2.15E-26 |  | 0.0792 | 0.0118 | 3.01E-04 | 113.01 |
| rs113955098 | A | G | -0.0994 | 0.0158 | 3.38E-10 |  | -0.2082 | 0.0436 | 1.05E-04 | 39.44 |
| rs114106239 | T | C | -0.1206 | 0.0212 | 1.19E-08 |  | 0.2247 | 0.0495 | 8.65E-05 | 32.51 |
| rs1228509 | C | A | 0.0471 | 0.0081 | 6.41E-09 |  | 0.2760 | 0.0123 | 8.97E-05 | 33.71 |
| rs13114985 | G | T | 0.0457 | 0.0081 | 2.01E-08 |  | 0.5101 | 0.0122 | 8.38E-05 | 31.48 |
| rs140896965 | T | C | -0.1125 | 0.0185 | 1.11E-09 |  | -0.0044 | 0.0594 | 9.88E-05 | 37.13 |
| rs2016950 | T | C | -0.0586 | 0.0107 | 4.13E-08 |  | -0.2763 | 0.0168 | 8.01E-05 | 30.09 |
| rs2370982 | T | C | 0.0515 | 0.0089 | 7.97E-09 |  | -0.0291 | 0.0143 | 8.86E-05 | 33.28 |
| rs59333125 | C | A | -0.0816 | 0.0144 | 1.32E-08 |  | -0.2696 | 0.0237 | 8.60E-05 | 32.30 |
| rs60700772 | C | T | 0.0517 | 0.0092 | 2.20E-08 |  | -0.1664 | 0.0143 | 8.33E-05 | 31.31 |
| rs61873510 | T | G | 0.0464 | 0.0084 | 3.28E-08 |  | 0.2864 | 0.0130 | 8.13E-05 | 30.53 |
| rs6484367 | A | G | 0.0468 | 0.0077 | 1.13E-09 |  | -0.0512 | 0.0118 | 9.87E-05 | 37.09 |
| rs679880 | A | G | 0.0495 | 0.0089 | 2.53E-08 |  | 0.2987 | 0.0146 | 8.26E-05 | 31.04 |
| rs76229479 | C | A | -0.0780 | 0.0131 | 2.64E-09 |  | -0.0026 | 0.0185 | 9.43E-05 | 35.44 |
| **CCL23** |  |  |  |  |  |  |  |  |  |  |
| rs10507084 | T | C | 0.0647 | 0.0100 | 8.23E-11 |  | -0.0757 | 0.0251 | 1.12E-04 | 42.20 |
| rs10986730 | T | C | -0.0468 | 0.0077 | 1.16E-09 |  | -0.3440 | 0.0116 | 9.86E-05 | 37.03 |
| rs113955098 | A | G | -0.0994 | 0.0158 | 3.38E-10 |  | 0.2997 | 0.0428 | 1.05E-04 | 39.44 |
| rs114106239 | T | C | -0.1206 | 0.0212 | 1.19E-08 |  | 0.4130 | 0.0496 | 8.65E-05 | 32.51 |
| rs11981973 | G | A | 0.0613 | 0.0098 | 4.72E-10 |  | -0.4193 | 0.0154 | 1.03E-04 | 38.79 |
| rs13114985 | G | T | 0.0457 | 0.0081 | 2.01E-08 |  | 0.0744 | 0.0121 | 8.38E-05 | 31.48 |
| rs140896965 | T | C | -0.1125 | 0.0185 | 1.11E-09 |  | -0.0809 | 0.0592 | 9.88E-05 | 37.13 |
| rs2016950 | T | C | -0.0586 | 0.0107 | 4.13E-08 |  | 0.1040 | 0.0165 | 8.01E-05 | 30.09 |
| rs2370982 | T | C | 0.0515 | 0.0089 | 7.97E-09 |  | -0.1456 | 0.0141 | 8.86E-05 | 33.28 |
| rs59333125 | C | A | -0.0816 | 0.0144 | 1.32E-08 |  | 0.1630 | 0.0236 | 8.60E-05 | 32.30 |
| rs60700772 | C | T | 0.0517 | 0.0092 | 2.20E-08 |  | 0.2650 | 0.0141 | 8.33E-05 | 31.31 |
| rs61873510 | T | G | 0.0464 | 0.0084 | 3.28E-08 |  | -0.4114 | 0.0129 | 8.13E-05 | 30.53 |
| rs6484367 | A | G | 0.0468 | 0.0077 | 1.13E-09 |  | 0.2092 | 0.0118 | 9.87E-05 | 37.09 |
| rs679880 | A | G | 0.0495 | 0.0089 | 2.53E-08 |  | 0.0706 | 0.0144 | 8.26E-05 | 31.04 |
| rs76229479 | C | A | -0.0780 | 0.0131 | 2.64E-09 |  | -0.4270 | 0.0183 | 9.43E-05 | 35.44 |
| **CCL25** |  |  |  |  |  |  |  |  |  |  |
| rs10507084 | T | C | 0.0647 | 0.0100 | 8.23E-11 |  | -0.4062 | 0.0249 | 1.12E-04 | 42.20 |
| rs11075985 | A | C | 0.0821 | 0.0077 | 2.15E-26 |  | 0.0877 | 0.0116 | 3.01E-04 | 113.01 |
| rs113955098 | A | G | -0.0994 | 0.0158 | 3.38E-10 |  | -0.3339 | 0.0426 | 1.05E-04 | 39.44 |
| rs114106239 | T | C | -0.1206 | 0.0212 | 1.19E-08 |  | 0.4188 | 0.0494 | 8.65E-05 | 32.51 |
| rs11981973 | G | A | 0.0613 | 0.0098 | 4.72E-10 |  | -0.0571 | 0.0154 | 1.03E-04 | 38.79 |
| rs1228509 | C | A | 0.0471 | 0.0081 | 6.41E-09 |  | 0.1614 | 0.0122 | 8.97E-05 | 33.71 |
| rs140896965 | T | C | -0.1125 | 0.0185 | 1.11E-09 |  | 0.5928 | 0.0576 | 9.88E-05 | 37.13 |
| rs2016950 | T | C | -0.0586 | 0.0107 | 4.13E-08 |  | -0.1194 | 0.0165 | 8.01E-05 | 30.09 |
| rs2370982 | T | C | 0.0515 | 0.0089 | 7.97E-09 |  | -0.0485 | 0.0141 | 8.86E-05 | 33.28 |
| rs60700772 | C | T | 0.0517 | 0.0092 | 2.20E-08 |  | -0.0077 | 0.0141 | 8.33E-05 | 31.31 |
| rs61873510 | T | G | 0.0464 | 0.0084 | 3.28E-08 |  | 0.6160 | 0.0129 | 8.13E-05 | 30.53 |
| rs6484367 | A | G | 0.0468 | 0.0077 | 1.13E-09 |  | 0.2156 | 0.0117 | 9.87E-05 | 37.09 |
| rs679880 | A | G | 0.0495 | 0.0089 | 2.53E-08 |  | 0.2604 | 0.0144 | 8.26E-05 | 31.04 |
| rs76229479 | C | A | -0.0780 | 0.0131 | 2.64E-09 |  | -0.0321 | 0.0182 | 9.43E-05 | 35.44 |
| **CCL28** |  |  |  |  |  |  |  |  |  |  |
| rs10507084 | T | C | 0.0647 | 0.0100 | 8.23E-11 |  | -0.1498 | 0.0245 | 1.12E-04 | 42.20 |
| rs10986730 | T | C | -0.0468 | 0.0077 | 1.16E-09 |  | -0.4381 | 0.0113 | 9.86E-05 | 37.03 |
| rs11075985 | A | C | 0.0821 | 0.0077 | 2.15E-26 |  | -0.1389 | 0.0113 | 3.01E-04 | 113.01 |
| rs113955098 | A | G | -0.0994 | 0.0158 | 3.38E-10 |  | -0.1348 | 0.0411 | 1.05E-04 | 39.44 |
| rs114106239 | T | C | -0.1206 | 0.0212 | 1.19E-08 |  | -0.4246 | 0.0487 | 8.65E-05 | 32.51 |
| rs11981973 | G | A | 0.0613 | 0.0098 | 4.72E-10 |  | -0.6869 | 0.0149 | 1.03E-04 | 38.79 |
| rs1228509 | C | A | 0.0471 | 0.0081 | 6.41E-09 |  | -0.0127 | 0.0120 | 8.97E-05 | 33.71 |
| rs13114985 | G | T | 0.0457 | 0.0081 | 2.01E-08 |  | 0.0066 | 0.0118 | 8.38E-05 | 31.48 |
| rs140896965 | T | C | -0.1125 | 0.0185 | 1.11E-09 |  | 0.3031 | 0.0546 | 9.88E-05 | 37.13 |
| rs2016950 | T | C | -0.0586 | 0.0107 | 4.13E-08 |  | 0.1092 | 0.0160 | 8.01E-05 | 30.09 |
| rs2370982 | T | C | 0.0515 | 0.0089 | 7.97E-09 |  | -0.0971 | 0.0136 | 8.86E-05 | 33.28 |
| rs59333125 | C | A | -0.0816 | 0.0144 | 1.32E-08 |  | -0.2684 | 0.0228 | 8.60E-05 | 32.30 |
| rs60700772 | C | T | 0.0517 | 0.0092 | 2.20E-08 |  | -0.1103 | 0.0136 | 8.33E-05 | 31.31 |
| rs61873510 | T | G | 0.0464 | 0.0084 | 3.28E-08 |  | -0.1421 | 0.0126 | 8.13E-05 | 30.53 |
| rs6484367 | A | G | 0.0468 | 0.0077 | 1.13E-09 |  | 0.0021 | 0.0115 | 9.87E-05 | 37.09 |
| rs679880 | A | G | 0.0495 | 0.0089 | 2.53E-08 |  | 0.3774 | 0.0139 | 8.26E-05 | 31.04 |
| rs76229479 | C | A | -0.0780 | 0.0131 | 2.64E-09 |  | -0.1398 | 0.0177 | 9.43E-05 | 35.44 |
| **CX3CL1** |  |  |  |  |  |  |  |  |  |  |
| rs10507084 | T | C | 0.0647 | 0.0100 | 8.23E-11 |  | 0.2734 | 0.0252 | 1.12E-04 | 42.20 |
| rs10986730 | T | C | -0.0468 | 0.0077 | 1.16E-09 |  | -0.4829 | 0.0115 | 9.86E-05 | 37.03 |
| rs11075985 | A | C | 0.0821 | 0.0077 | 2.15E-26 |  | -0.3291 | 0.0116 | 3.01E-04 | 113.01 |
| rs113955098 | A | G | -0.0994 | 0.0158 | 3.38E-10 |  | -0.1116 | 0.0424 | 1.05E-04 | 39.44 |
| rs114106239 | T | C | -0.1206 | 0.0212 | 1.19E-08 |  | -0.1426 | 0.0493 | 8.65E-05 | 32.51 |
| rs11981973 | G | A | 0.0613 | 0.0098 | 4.72E-10 |  | -0.0587 | 0.0153 | 1.03E-04 | 38.79 |
| rs1228509 | C | A | 0.0471 | 0.0081 | 6.41E-09 |  | -0.0616 | 0.0123 | 8.97E-05 | 33.71 |
| rs13114985 | G | T | 0.0457 | 0.0081 | 2.01E-08 |  | -0.2080 | 0.0121 | 8.38E-05 | 31.48 |
| rs140896965 | T | C | -0.1125 | 0.0185 | 1.11E-09 |  | 1.0452 | 0.0592 | 9.88E-05 | 37.13 |
| rs2016950 | T | C | -0.0586 | 0.0107 | 4.13E-08 |  | -0.1535 | 0.0164 | 8.01E-05 | 30.09 |
| rs2370982 | T | C | 0.0515 | 0.0089 | 7.97E-09 |  | 0.3106 | 0.0140 | 8.86E-05 | 33.28 |
| rs59333125 | C | A | -0.0816 | 0.0144 | 1.32E-08 |  | -0.3138 | 0.0235 | 8.60E-05 | 32.30 |
| rs60700772 | C | T | 0.0517 | 0.0092 | 2.20E-08 |  | 0.1122 | 0.0140 | 8.33E-05 | 31.31 |
| rs61873510 | T | G | 0.0464 | 0.0084 | 3.28E-08 |  | 0.0022 | 0.0129 | 8.13E-05 | 30.53 |
| rs6484367 | A | G | 0.0468 | 0.0077 | 1.13E-09 |  | 0.3586 | 0.0117 | 9.87E-05 | 37.09 |
| rs679880 | A | G | 0.0495 | 0.0089 | 2.53E-08 |  | 0.3572 | 0.0143 | 8.26E-05 | 31.04 |
| rs76229479 | C | A | -0.0780 | 0.0131 | 2.64E-09 |  | -0.3244 | 0.0181 | 9.43E-05 | 35.44 |
| **MIP-1 alpha** |  |  |  |  |  |  |  |  |  |  |
| rs10507084 | T | C | 0.0647 | 0.0100 | 8.23E-11 |  | 0.0077 | 0.0249 | 1.12E-04 | 42.20 |
| rs10986730 | T | C | -0.0468 | 0.0077 | 1.16E-09 |  | -0.0427 | 0.0117 | 9.86E-05 | 37.03 |
| rs113955098 | A | G | -0.0994 | 0.0158 | 3.38E-10 |  | -0.3912 | 0.0429 | 1.05E-04 | 39.44 |
| rs114106239 | T | C | -0.1206 | 0.0212 | 1.19E-08 |  | 0.0672 | 0.0494 | 8.65E-05 | 32.51 |
| rs11981973 | G | A | 0.0613 | 0.0098 | 4.72E-10 |  | -0.0212 | 0.0155 | 1.03E-04 | 38.79 |
| rs1228509 | C | A | 0.0471 | 0.0081 | 6.41E-09 |  | 0.1593 | 0.0123 | 8.97E-05 | 33.71 |
| rs13114985 | G | T | 0.0457 | 0.0081 | 2.01E-08 |  | 0.1314 | 0.0121 | 8.38E-05 | 31.48 |
| rs140896965 | T | C | -0.1125 | 0.0185 | 1.11E-09 |  | 0.3279 | 0.0575 | 9.88E-05 | 37.13 |
| rs2016950 | T | C | -0.0586 | 0.0107 | 4.13E-08 |  | 0.0171 | 0.0166 | 8.01E-05 | 30.09 |
| rs2370982 | T | C | 0.0515 | 0.0089 | 7.97E-09 |  | 0.0175 | 0.0142 | 8.86E-05 | 33.28 |
| rs59333125 | C | A | -0.0816 | 0.0144 | 1.32E-08 |  | -0.0429 | 0.0235 | 8.60E-05 | 32.30 |
| rs60700772 | C | T | 0.0517 | 0.0092 | 2.20E-08 |  | 0.0329 | 0.0142 | 8.33E-05 | 31.31 |
| rs61873510 | T | G | 0.0464 | 0.0084 | 3.28E-08 |  | 0.1680 | 0.0129 | 8.13E-05 | 30.53 |
| rs6484367 | A | G | 0.0468 | 0.0077 | 1.13E-09 |  | -0.0640 | 0.0118 | 9.87E-05 | 37.09 |
| rs679880 | A | G | 0.0495 | 0.0089 | 2.53E-08 |  | 0.2563 | 0.0145 | 8.26E-05 | 31.04 |
| rs76229479 | C | A | -0.0780 | 0.0131 | 2.64E-09 |  | 0.1449 | 0.0184 | 9.43E-05 | 35.44 |
| **Beta-NGF** |  |  |  |  |  |  |  |  |  |  |
| rs10507084 | T | C | 0.0647 | 0.0100 | 8.23E-11 |  | -0.5313 | 0.0251 | 1.12E-04 | 42.20 |
| rs113955098 | A | G | -0.0994 | 0.0158 | 3.38E-10 |  | -0.0614 | 0.0406 | 1.05E-04 | 39.44 |
| rs114106239 | T | C | -0.1206 | 0.0212 | 1.19E-08 |  | 0.3052 | 0.0495 | 8.65E-05 | 32.51 |
| rs11981973 | G | A | 0.0613 | 0.0098 | 4.72E-10 |  | -0.1648 | 0.0148 | 1.03E-04 | 38.79 |
| rs1228509 | C | A | 0.0471 | 0.0081 | 6.41E-09 |  | 0.2909 | 0.0123 | 8.97E-05 | 33.71 |
| rs140896965 | T | C | -0.1125 | 0.0185 | 1.11E-09 |  | 0.8816 | 0.0595 | 9.88E-05 | 37.13 |
| rs2016950 | T | C | -0.0586 | 0.0107 | 4.13E-08 |  | 0.0853 | 0.0158 | 8.01E-05 | 30.09 |
| rs2370982 | T | C | 0.0515 | 0.0089 | 7.97E-09 |  | 0.0757 | 0.0135 | 8.86E-05 | 33.28 |
| rs59333125 | C | A | -0.0816 | 0.0144 | 1.32E-08 |  | 0.1324 | 0.0236 | 8.60E-05 | 32.30 |
| rs60700772 | C | T | 0.0517 | 0.0092 | 2.20E-08 |  | 0.2379 | 0.0135 | 8.33E-05 | 31.31 |
| rs61873510 | T | G | 0.0464 | 0.0084 | 3.28E-08 |  | 0.1615 | 0.0129 | 8.13E-05 | 30.53 |
| rs6484367 | A | G | 0.0468 | 0.0077 | 1.13E-09 |  | 0.1110 | 0.0118 | 9.87E-05 | 37.09 |
| rs679880 | A | G | 0.0495 | 0.0089 | 2.53E-08 |  | -0.1716 | 0.0139 | 8.26E-05 | 31.04 |
| rs76229479 | C | A | -0.0780 | 0.0131 | 2.64E-09 |  | -0.1718 | 0.0174 | 9.43E-05 | 35.44 |
| **DNER** |  |  |  |  |  |  |  |  |  |  |
| rs10507084 | T | C | 0.0647 | 0.0100 | 8.23E-11 |  | 0.1375 | 0.0251 | 1.12E-04 | 42.20 |
| rs10986730 | T | C | -0.0468 | 0.0077 | 1.16E-09 |  | -0.2094 | 0.0114 | 9.86E-05 | 37.03 |
| rs11075985 | A | C | 0.0821 | 0.0077 | 2.15E-26 |  | -0.2096 | 0.0114 | 3.01E-04 | 113.01 |
| rs113955098 | A | G | -0.0994 | 0.0158 | 3.38E-10 |  | 0.3993 | 0.0418 | 1.05E-04 | 39.44 |
| rs114106239 | T | C | -0.1206 | 0.0212 | 1.19E-08 |  | 0.0730 | 0.0490 | 8.65E-05 | 32.51 |
| rs11981973 | G | A | 0.0613 | 0.0098 | 4.72E-10 |  | -0.3443 | 0.0151 | 1.03E-04 | 38.79 |
| rs1228509 | C | A | 0.0471 | 0.0081 | 6.41E-09 |  | -0.1635 | 0.0121 | 8.97E-05 | 33.71 |
| rs13114985 | G | T | 0.0457 | 0.0081 | 2.01E-08 |  | -0.2211 | 0.0119 | 8.38E-05 | 31.48 |
| rs140896965 | T | C | -0.1125 | 0.0185 | 1.11E-09 |  | 0.8185 | 0.0585 | 9.88E-05 | 37.13 |
| rs2016950 | T | C | -0.0586 | 0.0107 | 4.13E-08 |  | -0.1484 | 0.0162 | 8.01E-05 | 30.09 |
| rs2370982 | T | C | 0.0515 | 0.0089 | 7.97E-09 |  | -0.2077 | 0.0138 | 8.86E-05 | 33.28 |
| rs59333125 | C | A | -0.0816 | 0.0144 | 1.32E-08 |  | -0.0711 | 0.0233 | 8.60E-05 | 32.30 |
| rs60700772 | C | T | 0.0517 | 0.0092 | 2.20E-08 |  | 0.1199 | 0.0138 | 8.33E-05 | 31.31 |
| rs61873510 | T | G | 0.0464 | 0.0084 | 3.28E-08 |  | -0.0926 | 0.0127 | 8.13E-05 | 30.53 |
| rs6484367 | A | G | 0.0468 | 0.0077 | 1.13E-09 |  | -0.0726 | 0.0116 | 9.87E-05 | 37.09 |
| rs679880 | A | G | 0.0495 | 0.0089 | 2.53E-08 |  | -0.2422 | 0.0141 | 8.26E-05 | 31.04 |
| rs76229479 | C | A | -0.0780 | 0.0131 | 2.64E-09 |  | -0.2808 | 0.0179 | 9.43E-05 | 35.44 |
| **FGF-5** |  |  |  |  |  |  |  |  |  |  |
| rs10507084 | T | C | 0.0647 | 0.0100 | 8.23E-11 |  | -0.1375 | 0.0247 | 1.12E-04 | 42.20 |
| rs10986730 | T | C | -0.0468 | 0.0077 | 1.16E-09 |  | -0.2863 | 0.0125 | 9.86E-05 | 37.03 |
| rs11075985 | A | C | 0.0821 | 0.0077 | 2.15E-26 |  | 0.1231 | 0.0125 | 3.01E-04 | 113.01 |
| rs113955098 | A | G | -0.0994 | 0.0158 | 3.38E-10 |  | -0.1197 | 0.0428 | 1.05E-04 | 39.44 |
| rs114106239 | T | C | -0.1206 | 0.0212 | 1.19E-08 |  | -0.6045 | 0.0541 | 8.65E-05 | 32.51 |
| rs1228509 | C | A | 0.0471 | 0.0081 | 6.41E-09 |  | 0.3121 | 0.0138 | 8.97E-05 | 33.71 |
| rs13114985 | G | T | 0.0457 | 0.0081 | 2.01E-08 |  | 0.1379 | 0.0136 | 8.38E-05 | 31.48 |
| rs140896965 | T | C | -0.1125 | 0.0185 | 1.11E-09 |  | -0.5235 | 0.0614 | 9.88E-05 | 37.13 |
| rs2016950 | T | C | -0.0586 | 0.0107 | 4.13E-08 |  | 0.0119 | 0.0178 | 8.01E-05 | 30.09 |
| rs2370982 | T | C | 0.0515 | 0.0089 | 7.97E-09 |  | 0.0738 | 0.0149 | 8.86E-05 | 33.28 |
| rs59333125 | C | A | -0.0816 | 0.0144 | 1.32E-08 |  | 0.2071 | 0.0268 | 8.60E-05 | 32.30 |
| rs61873510 | T | G | 0.0464 | 0.0084 | 3.28E-08 |  | 0.4372 | 0.0146 | 8.13E-05 | 30.53 |
| rs6484367 | A | G | 0.0468 | 0.0077 | 1.13E-09 |  | -0.1430 | 0.0132 | 9.87E-05 | 37.09 |
| rs679880 | A | G | 0.0495 | 0.0089 | 2.53E-08 |  | -0.1776 | 0.0157 | 8.26E-05 | 31.04 |
| rs76229479 | C | A | -0.0780 | 0.0131 | 2.64E-09 |  | 0.1359 | 0.0194 | 9.43E-05 | 35.44 |
| **FGF-19** |  |  |  |  |  |  |  |  |  |  |
| rs10507084 | T | C | 0.0647 | 0.0100 | 8.23E-11 |  | -0.0788 | 0.0251 | 1.12E-04 | 42.20 |
| rs10986730 | T | C | -0.0468 | 0.0077 | 1.16E-09 |  | -0.0085 | 0.0118 | 9.86E-05 | 37.03 |
| rs11075985 | A | C | 0.0821 | 0.0077 | 2.15E-26 |  | -0.0573 | 0.0119 | 3.01E-04 | 113.01 |
| rs113955098 | A | G | -0.0994 | 0.0158 | 3.38E-10 |  | 0.1911 | 0.0436 | 1.05E-04 | 39.44 |
| rs114106239 | T | C | -0.1206 | 0.0212 | 1.19E-08 |  | -0.5473 | 0.0496 | 8.65E-05 | 32.51 |
| rs11981973 | G | A | 0.0613 | 0.0098 | 4.72E-10 |  | -0.2056 | 0.0157 | 1.03E-04 | 38.79 |
| rs1228509 | C | A | 0.0471 | 0.0081 | 6.41E-09 |  | -0.1317 | 0.0124 | 8.97E-05 | 33.71 |
| rs13114985 | G | T | 0.0457 | 0.0081 | 2.01E-08 |  | -0.2671 | 0.0122 | 8.38E-05 | 31.48 |
| rs140896965 | T | C | -0.1125 | 0.0185 | 1.11E-09 |  | -0.3333 | 0.0592 | 9.88E-05 | 37.13 |
| rs2016950 | T | C | -0.0586 | 0.0107 | 4.13E-08 |  | 0.2388 | 0.0168 | 8.01E-05 | 30.09 |
| rs2370982 | T | C | 0.0515 | 0.0089 | 7.97E-09 |  | 0.1805 | 0.0144 | 8.86E-05 | 33.28 |
| rs59333125 | C | A | -0.0816 | 0.0144 | 1.32E-08 |  | -0.2120 | 0.0238 | 8.60E-05 | 32.30 |
| rs60700772 | C | T | 0.0517 | 0.0092 | 2.20E-08 |  | -0.0677 | 0.0144 | 8.33E-05 | 31.31 |
| rs61873510 | T | G | 0.0464 | 0.0084 | 3.28E-08 |  | 0.3769 | 0.0130 | 8.13E-05 | 30.53 |
| rs6484367 | A | G | 0.0468 | 0.0077 | 1.13E-09 |  | 0.3352 | 0.0119 | 9.87E-05 | 37.09 |
| rs679880 | A | G | 0.0495 | 0.0089 | 2.53E-08 |  | -0.3492 | 0.0147 | 8.26E-05 | 31.04 |
| rs76229479 | C | A | -0.0780 | 0.0131 | 2.64E-09 |  | -0.2693 | 0.0186 | 9.43E-05 | 35.44 |
| **FGF-21** |  |  |  |  |  |  |  |  |  |  |
| rs10507084 | T | C | 0.0647 | 0.0100 | 8.23E-11 |  | -0.4587 | 0.0250 | 1.12E-04 | 42.20 |
| rs10986730 | T | C | -0.0468 | 0.0077 | 1.16E-09 |  | -0.1389 | 0.0118 | 9.86E-05 | 37.03 |
| rs113955098 | A | G | -0.0994 | 0.0158 | 3.38E-10 |  | 0.3912 | 0.0436 | 1.05E-04 | 39.44 |
| rs114106239 | T | C | -0.1206 | 0.0212 | 1.19E-08 |  | -0.0481 | 0.0497 | 8.65E-05 | 32.51 |
| rs11981973 | G | A | 0.0613 | 0.0098 | 4.72E-10 |  | -0.0294 | 0.0157 | 1.03E-04 | 38.79 |
| rs1228509 | C | A | 0.0471 | 0.0081 | 6.41E-09 |  | -0.0573 | 0.0124 | 8.97E-05 | 33.71 |
| rs13114985 | G | T | 0.0457 | 0.0081 | 2.01E-08 |  | 0.0722 | 0.0122 | 8.38E-05 | 31.48 |
| rs2016950 | T | C | -0.0586 | 0.0107 | 4.13E-08 |  | -0.1296 | 0.0168 | 8.01E-05 | 30.09 |
| rs59333125 | C | A | -0.0816 | 0.0144 | 1.32E-08 |  | -0.5344 | 0.0238 | 8.60E-05 | 32.30 |
| rs60700772 | C | T | 0.0517 | 0.0092 | 2.20E-08 |  | 0.1238 | 0.0144 | 8.33E-05 | 31.31 |
| rs61873510 | T | G | 0.0464 | 0.0084 | 3.28E-08 |  | -0.4006 | 0.0130 | 8.13E-05 | 30.53 |
| rs6484367 | A | G | 0.0468 | 0.0077 | 1.13E-09 |  | -0.0662 | 0.0119 | 9.87E-05 | 37.09 |
| rs76229479 | C | A | -0.0780 | 0.0131 | 2.64E-09 |  | -0.6014 | 0.0186 | 9.43E-05 | 35.44 |
| **FGF-23** |  |  |  |  |  |  |  |  |  |  |
| rs10507084 | T | C | 0.0647 | 0.0100 | 8.23E-11 |  | -0.4170 | 0.0251 | 1.12E-04 | 42.20 |
| rs10986730 | T | C | -0.0468 | 0.0077 | 1.16E-09 |  | -0.1282 | 0.0113 | 9.86E-05 | 37.03 |
| rs11075985 | A | C | 0.0821 | 0.0077 | 2.15E-26 |  | 0.1743 | 0.0113 | 3.01E-04 | 113.01 |
| rs113955098 | A | G | -0.0994 | 0.0158 | 3.38E-10 |  | 0.3450 | 0.0413 | 1.05E-04 | 39.44 |
| rs114106239 | T | C | -0.1206 | 0.0212 | 1.19E-08 |  | 0.5199 | 0.0495 | 8.65E-05 | 32.51 |
| rs11981973 | G | A | 0.0613 | 0.0098 | 4.72E-10 |  | 0.1762 | 0.0150 | 1.03E-04 | 38.79 |
| rs1228509 | C | A | 0.0471 | 0.0081 | 6.41E-09 |  | -0.0127 | 0.0123 | 8.97E-05 | 33.71 |
| rs13114985 | G | T | 0.0457 | 0.0081 | 2.01E-08 |  | -0.1029 | 0.0121 | 8.38E-05 | 31.48 |
| rs140896965 | T | C | -0.1125 | 0.0185 | 1.11E-09 |  | -0.2746 | 0.0596 | 9.88E-05 | 37.13 |
| rs2016950 | T | C | -0.0586 | 0.0107 | 4.13E-08 |  | -0.0648 | 0.0161 | 8.01E-05 | 30.09 |
| rs2370982 | T | C | 0.0515 | 0.0089 | 7.97E-09 |  | 0.2155 | 0.0137 | 8.86E-05 | 33.28 |
| rs59333125 | C | A | -0.0816 | 0.0144 | 1.32E-08 |  | 0.1691 | 0.0237 | 8.60E-05 | 32.30 |
| rs60700772 | C | T | 0.0517 | 0.0092 | 2.20E-08 |  | 0.1664 | 0.0137 | 8.33E-05 | 31.31 |
| rs61873510 | T | G | 0.0464 | 0.0084 | 3.28E-08 |  | 0.5147 | 0.0129 | 8.13E-05 | 30.53 |
| rs6484367 | A | G | 0.0468 | 0.0077 | 1.13E-09 |  | -0.0939 | 0.0118 | 9.87E-05 | 37.09 |
| rs679880 | A | G | 0.0495 | 0.0089 | 2.53E-08 |  | 0.3855 | 0.0141 | 8.26E-05 | 31.04 |
| rs76229479 | C | A | -0.0780 | 0.0131 | 2.64E-09 |  | -0.2962 | 0.0177 | 9.43E-05 | 35.44 |
| **HGF** |  |  |  |  |  |  |  |  |  |  |
| rs10507084 | T | C | 0.0647 | 0.0100 | 8.23E-11 |  | 0.2780 | 0.0244 | 1.12E-04 | 42.20 |
| rs10986730 | T | C | -0.0468 | 0.0077 | 1.16E-09 |  | -0.1090 | 0.0115 | 9.86E-05 | 37.03 |
| rs113955098 | A | G | -0.0994 | 0.0158 | 3.38E-10 |  | -0.2967 | 0.0414 | 1.05E-04 | 39.44 |
| rs114106239 | T | C | -0.1206 | 0.0212 | 1.19E-08 |  | 0.5349 | 0.0496 | 8.65E-05 | 32.51 |
| rs11981973 | G | A | 0.0613 | 0.0098 | 4.72E-10 |  | -0.2562 | 0.0152 | 1.03E-04 | 38.79 |
| rs1228509 | C | A | 0.0471 | 0.0081 | 6.41E-09 |  | 0.1805 | 0.0122 | 8.97E-05 | 33.71 |
| rs13114985 | G | T | 0.0457 | 0.0081 | 2.01E-08 |  | 0.0941 | 0.0121 | 8.38E-05 | 31.48 |
| rs140896965 | T | C | -0.1125 | 0.0185 | 1.11E-09 |  | -0.0693 | 0.0554 | 9.88E-05 | 37.13 |
| rs2016950 | T | C | -0.0586 | 0.0107 | 4.13E-08 |  | -0.2456 | 0.0163 | 8.01E-05 | 30.09 |
| rs2370982 | T | C | 0.0515 | 0.0089 | 7.97E-09 |  | -0.1437 | 0.0139 | 8.86E-05 | 33.28 |
| rs59333125 | C | A | -0.0816 | 0.0144 | 1.32E-08 |  | -0.2365 | 0.0233 | 8.60E-05 | 32.30 |
| rs60700772 | C | T | 0.0517 | 0.0092 | 2.20E-08 |  | 0.0832 | 0.0139 | 8.33E-05 | 31.31 |
| rs61873510 | T | G | 0.0464 | 0.0084 | 3.28E-08 |  | 0.0000 | 0.0129 | 8.13E-05 | 30.53 |
| rs6484367 | A | G | 0.0468 | 0.0077 | 1.13E-09 |  | -0.0278 | 0.0117 | 9.87E-05 | 37.09 |
| rs679880 | A | G | 0.0495 | 0.0089 | 2.53E-08 |  | 0.0706 | 0.0142 | 8.26E-05 | 31.04 |
| rs76229479 | C | A | -0.0780 | 0.0131 | 2.64E-09 |  | -0.2385 | 0.0180 | 9.43E-05 | 35.44 |
| **LAP TGF-beta-1** |  |  |  |  |  |  |  |  |  |  |
| rs10507084 | T | C | 0.0647 | 0.0100 | 8.23E-11 |  | 0.4541 | 0.0250 | 1.12E-04 | 42.20 |
| rs10986730 | T | C | -0.0468 | 0.0077 | 1.16E-09 |  | 0.0085 | 0.0116 | 9.86E-05 | 37.03 |
| rs113955098 | A | G | -0.0994 | 0.0158 | 3.38E-10 |  | -0.1991 | 0.0423 | 1.05E-04 | 39.44 |
| rs114106239 | T | C | -0.1206 | 0.0212 | 1.19E-08 |  | 0.1750 | 0.0497 | 8.65E-05 | 32.51 |
| rs11981973 | G | A | 0.0613 | 0.0098 | 4.72E-10 |  | -0.1028 | 0.0154 | 1.03E-04 | 38.79 |
| rs1228509 | C | A | 0.0471 | 0.0081 | 6.41E-09 |  | -0.1423 | 0.0124 | 8.97E-05 | 33.71 |
| rs13114985 | G | T | 0.0457 | 0.0081 | 2.01E-08 |  | -0.0219 | 0.0122 | 8.38E-05 | 31.48 |
| rs140896965 | T | C | -0.1125 | 0.0185 | 1.11E-09 |  | -0.1635 | 0.0584 | 9.88E-05 | 37.13 |
| rs2016950 | T | C | -0.0586 | 0.0107 | 4.13E-08 |  | -0.1518 | 0.0165 | 8.01E-05 | 30.09 |
| rs2370982 | T | C | 0.0515 | 0.0089 | 7.97E-09 |  | -0.1572 | 0.0141 | 8.86E-05 | 33.28 |
| rs59333125 | C | A | -0.0816 | 0.0144 | 1.32E-08 |  | -0.0380 | 0.0237 | 8.60E-05 | 32.30 |
| rs60700772 | C | T | 0.0517 | 0.0092 | 2.20E-08 |  | 0.1354 | 0.0140 | 8.33E-05 | 31.31 |
| rs61873510 | T | G | 0.0464 | 0.0084 | 3.28E-08 |  | 0.1098 | 0.0130 | 8.13E-05 | 30.53 |
| rs6484367 | A | G | 0.0468 | 0.0077 | 1.13E-09 |  | 0.0363 | 0.0118 | 9.87E-05 | 37.09 |
| rs679880 | A | G | 0.0495 | 0.0089 | 2.53E-08 |  | -0.2059 | 0.0144 | 8.26E-05 | 31.04 |
| rs76229479 | C | A | -0.0780 | 0.0131 | 2.64E-09 |  | -0.1090 | 0.0182 | 9.43E-05 | 35.44 |
| **TGF-alpha** |  |  |  |  |  |  |  |  |  |  |
| rs10507084 | T | C | 0.0647 | 0.0100 | 8.23E-11 |  | 0.2888 | 0.0251 | 1.12E-04 | 42.20 |
| rs10986730 | T | C | -0.0468 | 0.0077 | 1.16E-09 |  | -0.1111 | 0.0117 | 9.86E-05 | 37.03 |
| rs11075985 | A | C | 0.0821 | 0.0077 | 2.15E-26 |  | 0.1426 | 0.0117 | 3.01E-04 | 113.01 |
| rs113955098 | A | G | -0.0994 | 0.0158 | 3.38E-10 |  | -0.0121 | 0.0430 | 1.05E-04 | 39.44 |
| rs114106239 | T | C | -0.1206 | 0.0212 | 1.19E-08 |  | -0.1111 | 0.0496 | 8.65E-05 | 32.51 |
| rs11981973 | G | A | 0.0613 | 0.0098 | 4.72E-10 |  | -0.1664 | 0.0155 | 1.03E-04 | 38.79 |
| rs1228509 | C | A | 0.0471 | 0.0081 | 6.41E-09 |  | 0.4247 | 0.0123 | 8.97E-05 | 33.71 |
| rs13114985 | G | T | 0.0457 | 0.0081 | 2.01E-08 |  | -0.1773 | 0.0121 | 8.38E-05 | 31.48 |
| rs140896965 | T | C | -0.1125 | 0.0185 | 1.11E-09 |  | 0.2533 | 0.0587 | 9.88E-05 | 37.13 |
| rs2016950 | T | C | -0.0586 | 0.0107 | 4.13E-08 |  | -0.3496 | 0.0166 | 8.01E-05 | 30.09 |
| rs2370982 | T | C | 0.0515 | 0.0089 | 7.97E-09 |  | 0.3106 | 0.0142 | 8.86E-05 | 33.28 |
| rs59333125 | C | A | -0.0816 | 0.0144 | 1.32E-08 |  | -0.1030 | 0.0237 | 8.60E-05 | 32.30 |
| rs60700772 | C | T | 0.0517 | 0.0092 | 2.20E-08 |  | 0.2921 | 0.0142 | 8.33E-05 | 31.31 |
| rs61873510 | T | G | 0.0464 | 0.0084 | 3.28E-08 |  | -0.0108 | 0.0130 | 8.13E-05 | 30.53 |
| rs6484367 | A | G | 0.0468 | 0.0077 | 1.13E-09 |  | 0.1003 | 0.0118 | 9.87E-05 | 37.09 |
| rs679880 | A | G | 0.0495 | 0.0089 | 2.53E-08 |  | 0.0121 | 0.0145 | 8.26E-05 | 31.04 |
| rs76229479 | C | A | -0.0780 | 0.0131 | 2.64E-09 |  | -0.2398 | 0.0183 | 9.43E-05 | 35.44 |
| **VEGF_A** |  |  |  |  |  |  |  |  |  |  |
| rs10507084 | T | C | 0.0647 | 0.0100 | 8.23E-11 |  | 0.1359 | 0.0248 | 1.12E-04 | 42.20 |
| rs113955098 | A | G | -0.0994 | 0.0158 | 3.38E-10 |  | 0.0181 | 0.0428 | 1.05E-04 | 39.44 |
| rs114106239 | T | C | -0.1206 | 0.0212 | 1.19E-08 |  | -0.2612 | 0.0496 | 8.65E-05 | 32.51 |
| rs11981973 | G | A | 0.0613 | 0.0098 | 4.72E-10 |  | 0.1387 | 0.0155 | 1.03E-04 | 38.79 |
| rs1228509 | C | A | 0.0471 | 0.0081 | 6.41E-09 |  | -0.0255 | 0.0123 | 8.97E-05 | 33.71 |
| rs140896965 | T | C | -0.1125 | 0.0185 | 1.11E-09 |  | -0.1911 | 0.0576 | 9.88E-05 | 37.13 |
| rs2016950 | T | C | -0.0586 | 0.0107 | 4.13E-08 |  | 0.0478 | 0.0166 | 8.01E-05 | 30.09 |
| rs2370982 | T | C | 0.0515 | 0.0089 | 7.97E-09 |  | 0.2155 | 0.0142 | 8.86E-05 | 33.28 |
| rs59333125 | C | A | -0.0816 | 0.0144 | 1.32E-08 |  | -0.2513 | 0.0235 | 8.60E-05 | 32.30 |
| rs60700772 | C | T | 0.0517 | 0.0092 | 2.20E-08 |  | 0.0251 | 0.0142 | 8.33E-05 | 31.31 |
| rs61873510 | T | G | 0.0464 | 0.0084 | 3.28E-08 |  | 0.1249 | 0.0129 | 8.13E-05 | 30.53 |
| rs6484367 | A | G | 0.0468 | 0.0077 | 1.13E-09 |  | 0.2690 | 0.0117 | 9.87E-05 | 37.09 |
| rs679880 | A | G | 0.0495 | 0.0089 | 2.53E-08 |  | 0.3007 | 0.0145 | 8.26E-05 | 31.04 |
| rs76229479 | C | A | -0.0780 | 0.0131 | 2.64E-09 |  | -0.1551 | 0.0183 | 9.43E-05 | 35.44 |
| **SCF** |  |  |  |  |  |  |  |  |  |  |
| rs10507084 | T | C | 0.0647 | 0.0100 | 8.23E-11 |  | -0.1776 | 0.0253 | 1.12E-04 | 42.20 |
| rs10986730 | T | C | -0.0468 | 0.0077 | 1.16E-09 |  | -0.1218 | 0.0117 | 9.86E-05 | 37.03 |
| rs11075985 | A | C | 0.0821 | 0.0077 | 2.15E-26 |  | -0.1012 | 0.0117 | 3.01E-04 | 113.01 |
| rs113955098 | A | G | -0.0994 | 0.0158 | 3.38E-10 |  | 0.2243 | 0.0432 | 1.05E-04 | 39.44 |
| rs114106239 | T | C | -0.1206 | 0.0212 | 1.19E-08 |  | -0.2745 | 0.0495 | 8.65E-05 | 32.51 |
| rs1228509 | C | A | 0.0471 | 0.0081 | 6.41E-09 |  | 0.0828 | 0.0123 | 8.97E-05 | 33.71 |
| rs13114985 | G | T | 0.0457 | 0.0081 | 2.01E-08 |  | -0.2277 | 0.0121 | 8.38E-05 | 31.48 |
| rs140896965 | T | C | -0.1125 | 0.0185 | 1.11E-09 |  | -0.1440 | 0.0603 | 9.88E-05 | 37.13 |
| rs2016950 | T | C | -0.0586 | 0.0107 | 4.13E-08 |  | -0.2916 | 0.0166 | 8.01E-05 | 30.09 |
| rs2370982 | T | C | 0.0515 | 0.0089 | 7.97E-09 |  | -0.0466 | 0.0142 | 8.86E-05 | 33.28 |
| rs59333125 | C | A | -0.0816 | 0.0144 | 1.32E-08 |  | -0.0221 | 0.0236 | 8.60E-05 | 32.30 |
| rs61873510 | T | G | 0.0464 | 0.0084 | 3.28E-08 |  | 0.1938 | 0.0129 | 8.13E-05 | 30.53 |
| rs6484367 | A | G | 0.0468 | 0.0077 | 1.13E-09 |  | 0.0726 | 0.0117 | 9.87E-05 | 37.09 |
| rs679880 | A | G | 0.0495 | 0.0089 | 2.53E-08 |  | 0.2604 | 0.0145 | 8.26E-05 | 31.04 |
| rs76229479 | C | A | -0.0780 | 0.0131 | 2.64E-09 |  | -0.1321 | 0.0183 | 9.43E-05 | 35.44 |
| **ARTN** |  |  |  |  |  |  |  |  |  |  |
| rs10507084 | T | C | 0.0647 | 0.0100 | 8.23E-11 |  | -0.1653 | 0.0251 | 1.12E-04 | 42.20 |
| rs10986730 | T | C | -0.0468 | 0.0077 | 1.16E-09 |  | 0.4146 | 0.0130 | 9.86E-05 | 37.03 |
| rs11075985 | A | C | 0.0821 | 0.0077 | 2.15E-26 |  | 0.1182 | 0.0130 | 3.01E-04 | 113.01 |
| rs113955098 | A | G | -0.0994 | 0.0158 | 3.38E-10 |  | -0.0010 | 0.0452 | 1.05E-04 | 39.44 |
| rs114106239 | T | C | -0.1206 | 0.0212 | 1.19E-08 |  | 0.5523 | 0.0545 | 8.65E-05 | 32.51 |
| rs1228509 | C | A | 0.0471 | 0.0081 | 6.41E-09 |  | -0.0042 | 0.0140 | 8.97E-05 | 33.71 |
| rs13114985 | G | T | 0.0457 | 0.0081 | 2.01E-08 |  | -0.0438 | 0.0137 | 8.38E-05 | 31.48 |
| rs140896965 | T | C | -0.1125 | 0.0185 | 1.11E-09 |  | 0.1458 | 0.0617 | 9.88E-05 | 37.13 |
| rs59333125 | C | A | -0.0816 | 0.0144 | 1.32E-08 |  | 0.2574 | 0.0270 | 8.60E-05 | 32.30 |
| rs60700772 | C | T | 0.0517 | 0.0092 | 2.20E-08 |  | 0.0464 | 0.0157 | 8.33E-05 | 31.31 |
| rs61873510 | T | G | 0.0464 | 0.0084 | 3.28E-08 |  | -0.1421 | 0.0148 | 8.13E-05 | 30.53 |
| rs679880 | A | G | 0.0495 | 0.0089 | 2.53E-08 |  | 0.2886 | 0.0163 | 8.26E-05 | 31.04 |
| rs76229479 | C | A | -0.0780 | 0.0131 | 2.64E-09 |  | 0.1103 | 0.0202 | 9.43E-05 | 35.44 |
| **CSF-1** |  |  |  |  |  |  |  |  |  |  |
| rs10986730 | T | C | -0.0468 | 0.0077 | 1.16E-09 |  | -0.6582 | 0.0114 | 9.86E-05 | 37.03 |
| rs114106239 | T | C | -0.1206 | 0.0212 | 1.19E-08 |  | 0.2173 | 0.0494 | 8.65E-05 | 32.51 |
| rs11981973 | G | A | 0.0613 | 0.0098 | 4.72E-10 |  | -0.0734 | 0.0150 | 1.03E-04 | 38.79 |
| rs1228509 | C | A | 0.0471 | 0.0081 | 6.41E-09 |  | -0.0764 | 0.0123 | 8.97E-05 | 33.71 |
| rs13114985 | G | T | 0.0457 | 0.0081 | 2.01E-08 |  | -0.3787 | 0.0121 | 8.38E-05 | 31.48 |
| rs140896965 | T | C | -0.1125 | 0.0185 | 1.11E-09 |  | 0.0693 | 0.0588 | 9.88E-05 | 37.13 |
| rs2016950 | T | C | -0.0586 | 0.0107 | 4.13E-08 |  | 0.0307 | 0.0161 | 8.01E-05 | 30.09 |
| rs59333125 | C | A | -0.0816 | 0.0144 | 1.32E-08 |  | -0.2365 | 0.0236 | 8.60E-05 | 32.30 |
| rs60700772 | C | T | 0.0517 | 0.0092 | 2.20E-08 |  | 0.0754 | 0.0137 | 8.33E-05 | 31.31 |
| rs61873510 | T | G | 0.0464 | 0.0084 | 3.28E-08 |  | 0.0474 | 0.0129 | 8.13E-05 | 30.53 |
| rs76229479 | C | A | -0.0780 | 0.0131 | 2.64E-09 |  | -0.3462 | 0.0178 | 9.43E-05 | 35.44 |
| **Flt3L** |  |  |  |  |  |  |  |  |  |  |
| rs10986730 | T | C | -0.0468 | 0.0077 | 1.16E-09 |  | -0.3334 | 0.0117 | 9.86E-05 | 37.03 |
| rs114106239 | T | C | -0.1206 | 0.0212 | 1.19E-08 |  | 0.4221 | 0.0497 | 8.65E-05 | 32.51 |
| rs11981973 | G | A | 0.0613 | 0.0098 | 4.72E-10 |  | -0.1273 | 0.0155 | 1.03E-04 | 38.79 |
| rs1228509 | C | A | 0.0471 | 0.0081 | 6.41E-09 |  | 0.0021 | 0.0123 | 8.97E-05 | 33.71 |
| rs13114985 | G | T | 0.0457 | 0.0081 | 2.01E-08 |  | -0.0044 | 0.0122 | 8.38E-05 | 31.48 |
| rs140896965 | T | C | -0.1125 | 0.0185 | 1.11E-09 |  | 0.4684 | 0.0582 | 9.88E-05 | 37.13 |
| rs2016950 | T | C | -0.0586 | 0.0107 | 4.13E-08 |  | -0.1399 | 0.0166 | 8.01E-05 | 30.09 |
| rs2370982 | T | C | 0.0515 | 0.0089 | 7.97E-09 |  | 0.0408 | 0.0141 | 8.86E-05 | 33.28 |
| rs60700772 | C | T | 0.0517 | 0.0092 | 2.20E-08 |  | -0.1934 | 0.0141 | 8.33E-05 | 31.31 |
| rs61873510 | T | G | 0.0464 | 0.0084 | 3.28E-08 |  | -0.2584 | 0.0130 | 8.13E-05 | 30.53 |
| rs6484367 | A | G | 0.0468 | 0.0077 | 1.13E-09 |  | 0.0000 | 0.0118 | 9.87E-05 | 37.09 |
| rs76229479 | C | A | -0.0780 | 0.0131 | 2.64E-09 |  | -0.3411 | 0.0183 | 9.43E-05 | 35.44 |
| **hGDNF** |  |  |  |  |  |  |  |  |  |  |
| rs10507084 | T | C | 0.0647 | 0.0100 | 8.23E-11 |  | 0.4093 | 0.0251 | 1.12E-04 | 42.20 |
| rs11075985 | A | C | 0.0821 | 0.0077 | 2.15E-26 |  | 0.0561 | 0.0115 | 3.01E-04 | 113.01 |
| rs113955098 | A | G | -0.0994 | 0.0158 | 3.38E-10 |  | 0.1991 | 0.0421 | 1.05E-04 | 39.44 |
| rs1228509 | C | A | 0.0471 | 0.0081 | 6.41E-09 |  | 0.0871 | 0.0123 | 8.97E-05 | 33.71 |
| rs13114985 | G | T | 0.0457 | 0.0081 | 2.01E-08 |  | -0.1117 | 0.0121 | 8.38E-05 | 31.48 |
| rs140896965 | T | C | -0.1125 | 0.0185 | 1.11E-09 |  | -0.2364 | 0.0593 | 9.88E-05 | 37.13 |
| rs2016950 | T | C | -0.0586 | 0.0107 | 4.13E-08 |  | 0.0750 | 0.0163 | 8.01E-05 | 30.09 |
| rs2370982 | T | C | 0.0515 | 0.0089 | 7.97E-09 |  | -0.0097 | 0.0139 | 8.86E-05 | 33.28 |
| rs59333125 | C | A | -0.0816 | 0.0144 | 1.32E-08 |  | 0.2647 | 0.0237 | 8.60E-05 | 32.30 |
| rs61873510 | T | G | 0.0464 | 0.0084 | 3.28E-08 |  | 0.2628 | 0.0129 | 8.13E-05 | 30.53 |
| rs6484367 | A | G | 0.0468 | 0.0077 | 1.13E-09 |  | 0.0171 | 0.0118 | 9.87E-05 | 37.09 |
| rs679880 | A | G | 0.0495 | 0.0089 | 2.53E-08 |  | 0.4178 | 0.0143 | 8.26E-05 | 31.04 |
| rs76229479 | C | A | -0.0780 | 0.0131 | 2.64E-09 |  | 0.0064 | 0.0180 | 9.43E-05 | 35.44 |
| **LIF** |  |  |  |  |  |  |  |  |  |  |
| rs10507084 | T | C | 0.0647 | 0.0100 | 8.23E-11 |  | -0.0448 | 0.0252 | 1.12E-04 | 42.20 |
| rs10986730 | T | C | -0.0468 | 0.0077 | 1.16E-09 |  | -0.1667 | 0.0130 | 9.86E-05 | 37.03 |
| rs11075985 | A | C | 0.0821 | 0.0077 | 2.15E-26 |  | 0.2425 | 0.0130 | 3.01E-04 | 113.01 |
| rs113955098 | A | G | -0.0994 | 0.0158 | 3.38E-10 |  | 0.1660 | 0.0451 | 1.05E-04 | 39.44 |
| rs114106239 | T | C | -0.1206 | 0.0212 | 1.19E-08 |  | 0.1451 | 0.0544 | 8.65E-05 | 32.51 |
| rs11981973 | G | A | 0.0613 | 0.0098 | 4.72E-10 |  | -0.2611 | 0.0171 | 1.03E-04 | 38.79 |
| rs1228509 | C | A | 0.0471 | 0.0081 | 6.41E-09 |  | 0.3121 | 0.0140 | 8.97E-05 | 33.71 |
| rs13114985 | G | T | 0.0457 | 0.0081 | 2.01E-08 |  | 0.1927 | 0.0138 | 8.38E-05 | 31.48 |
| rs140896965 | T | C | -0.1125 | 0.0185 | 1.11E-09 |  | 0.7199 | 0.0640 | 9.88E-05 | 37.13 |
| rs2016950 | T | C | -0.0586 | 0.0107 | 4.13E-08 |  | -0.1057 | 0.0185 | 8.01E-05 | 30.09 |
| rs2370982 | T | C | 0.0515 | 0.0089 | 7.97E-09 |  | -0.2504 | 0.0156 | 8.86E-05 | 33.28 |
| rs59333125 | C | A | -0.0816 | 0.0144 | 1.32E-08 |  | -0.5528 | 0.0272 | 8.60E-05 | 32.30 |
| rs60700772 | C | T | 0.0517 | 0.0092 | 2.20E-08 |  | 0.3714 | 0.0156 | 8.33E-05 | 31.31 |
| rs61873510 | T | G | 0.0464 | 0.0084 | 3.28E-08 |  | 0.6461 | 0.0148 | 8.13E-05 | 30.53 |
| rs6484367 | A | G | 0.0468 | 0.0077 | 1.13E-09 |  | 0.3885 | 0.0134 | 9.87E-05 | 37.09 |
| rs679880 | A | G | 0.0495 | 0.0089 | 2.53E-08 |  | -0.0202 | 0.0163 | 8.26E-05 | 31.04 |
| rs76229479 | C | A | -0.0780 | 0.0131 | 2.64E-09 |  | 0.4590 | 0.0201 | 9.43E-05 | 35.44 |
| **LIF-R** |  |  |  |  |  |  |  |  |  |  |
| rs10507084 | T | C | 0.0647 | 0.0100 | 8.23E-11 |  | 0.0355 | 0.0252 | 1.12E-04 | 42.20 |
| rs11075985 | A | C | 0.0821 | 0.0077 | 2.15E-26 |  | 0.0427 | 0.0123 | 3.01E-04 | 113.01 |
| rs113955098 | A | G | -0.0994 | 0.0158 | 3.38E-10 |  | 0.6014 | 0.0421 | 1.05E-04 | 39.44 |
| rs114106239 | T | C | -0.1206 | 0.0212 | 1.19E-08 |  | 0.2214 | 0.0544 | 8.65E-05 | 32.51 |
| rs1228509 | C | A | 0.0471 | 0.0081 | 6.41E-09 |  | 0.0977 | 0.0140 | 8.97E-05 | 33.71 |
| rs140896965 | T | C | -0.1125 | 0.0185 | 1.11E-09 |  | 0.8896 | 0.0642 | 9.88E-05 | 37.13 |
| rs2016950 | T | C | -0.0586 | 0.0107 | 4.13E-08 |  | 0.1825 | 0.0175 | 8.01E-05 | 30.09 |
| rs2370982 | T | C | 0.0515 | 0.0089 | 7.97E-09 |  | 0.0155 | 0.0147 | 8.86E-05 | 33.28 |
| rs59333125 | C | A | -0.0816 | 0.0144 | 1.32E-08 |  | -0.2574 | 0.0272 | 8.60E-05 | 32.30 |
| rs60700772 | C | T | 0.0517 | 0.0092 | 2.20E-08 |  | -0.1973 | 0.0147 | 8.33E-05 | 31.31 |
| rs61873510 | T | G | 0.0464 | 0.0084 | 3.28E-08 |  | 0.0086 | 0.0148 | 8.13E-05 | 30.53 |
| rs6484367 | A | G | 0.0468 | 0.0077 | 1.13E-09 |  | 0.1836 | 0.0134 | 9.87E-05 | 37.09 |
| rs679880 | A | G | 0.0495 | 0.0089 | 2.53E-08 |  | -0.2846 | 0.0154 | 8.26E-05 | 31.04 |
| rs76229479 | C | A | -0.0780 | 0.0131 | 2.64E-09 |  | 0.1449 | 0.0190 | 9.43E-05 | 35.44 |
| **NRTN** |  |  |  |  |  |  |  |  |  |  |
| rs10507084 | T | C | 0.0647 | 0.0100 | 8.23E-11 |  | 0.0849 | 0.0251 | 1.12E-04 | 42.20 |
| rs10986730 | T | C | -0.0468 | 0.0077 | 1.16E-09 |  | -0.0449 | 0.0129 | 9.86E-05 | 37.03 |
| rs11075985 | A | C | 0.0821 | 0.0077 | 2.15E-26 |  | 0.1584 | 0.0129 | 3.01E-04 | 113.01 |
| rs113955098 | A | G | -0.0994 | 0.0158 | 3.38E-10 |  | 0.1841 | 0.0446 | 1.05E-04 | 39.44 |
| rs114106239 | T | C | -0.1206 | 0.0212 | 1.19E-08 |  | 0.1459 | 0.0543 | 8.65E-05 | 32.51 |
| rs11981973 | G | A | 0.0613 | 0.0098 | 4.72E-10 |  | -0.2692 | 0.0170 | 1.03E-04 | 38.79 |
| rs1228509 | C | A | 0.0471 | 0.0081 | 6.41E-09 |  | 0.1147 | 0.0140 | 8.97E-05 | 33.71 |
| rs13114985 | G | T | 0.0457 | 0.0081 | 2.01E-08 |  | 0.0832 | 0.0137 | 8.38E-05 | 31.48 |
| rs140896965 | T | C | -0.1125 | 0.0185 | 1.11E-09 |  | 0.3288 | 0.0619 | 9.88E-05 | 37.13 |
| rs2016950 | T | C | -0.0586 | 0.0107 | 4.13E-08 |  | 0.4213 | 0.0184 | 8.01E-05 | 30.09 |
| rs2370982 | T | C | 0.0515 | 0.0089 | 7.97E-09 |  | 0.0291 | 0.0155 | 8.86E-05 | 33.28 |
| rs59333125 | C | A | -0.0816 | 0.0144 | 1.32E-08 |  | 0.0049 | 0.0270 | 8.60E-05 | 32.30 |
| rs60700772 | C | T | 0.0517 | 0.0092 | 2.20E-08 |  | 0.1722 | 0.0155 | 8.33E-05 | 31.31 |
| rs61873510 | T | G | 0.0464 | 0.0084 | 3.28E-08 |  | -0.3015 | 0.0148 | 8.13E-05 | 30.53 |
| rs6484367 | A | G | 0.0468 | 0.0077 | 1.13E-09 |  | -0.4184 | 0.0133 | 9.87E-05 | 37.09 |
| rs679880 | A | G | 0.0495 | 0.0089 | 2.53E-08 |  | -0.2422 | 0.0162 | 8.26E-05 | 31.04 |
| rs76229479 | C | A | -0.0780 | 0.0131 | 2.64E-09 |  | 0.5308 | 0.0200 | 9.43E-05 | 35.44 |
| **NT-3** |  |  |  |  |  |  |  |  |  |  |
| rs10507084 | T | C | 0.0647 | 0.0100 | 8.23E-11 |  | 0.1869 | 0.0251 | 1.12E-04 | 42.20 |
| rs10986730 | T | C | -0.0468 | 0.0077 | 1.16E-09 |  | -0.2906 | 0.0115 | 9.86E-05 | 37.03 |
| rs11075985 | A | C | 0.0821 | 0.0077 | 2.15E-26 |  | 0.1694 | 0.0116 | 3.01E-04 | 113.01 |
| rs113955098 | A | G | -0.0994 | 0.0158 | 3.38E-10 |  | 0.6859 | 0.0422 | 1.05E-04 | 39.44 |
| rs114106239 | T | C | -0.1206 | 0.0212 | 1.19E-08 |  | 0.1534 | 0.0496 | 8.65E-05 | 32.51 |
| rs11981973 | G | A | 0.0613 | 0.0098 | 4.72E-10 |  | -0.1860 | 0.0153 | 1.03E-04 | 38.79 |
| rs1228509 | C | A | 0.0471 | 0.0081 | 6.41E-09 |  | 0.0637 | 0.0124 | 8.97E-05 | 33.71 |
| rs13114985 | G | T | 0.0457 | 0.0081 | 2.01E-08 |  | 0.0460 | 0.0122 | 8.38E-05 | 31.48 |
| rs140896965 | T | C | -0.1125 | 0.0185 | 1.11E-09 |  | 0.5217 | 0.0581 | 9.88E-05 | 37.13 |
| rs2016950 | T | C | -0.0586 | 0.0107 | 4.13E-08 |  | -0.0802 | 0.0164 | 8.01E-05 | 30.09 |
| rs2370982 | T | C | 0.0515 | 0.0089 | 7.97E-09 |  | 0.0427 | 0.0140 | 8.86E-05 | 33.28 |
| rs59333125 | C | A | -0.0816 | 0.0144 | 1.32E-08 |  | 0.5037 | 0.0237 | 8.60E-05 | 32.30 |
| rs60700772 | C | T | 0.0517 | 0.0092 | 2.20E-08 |  | 0.1354 | 0.0140 | 8.33E-05 | 31.31 |
| rs61873510 | T | G | 0.0464 | 0.0084 | 3.28E-08 |  | 0.0151 | 0.0130 | 8.13E-05 | 30.53 |
| rs6484367 | A | G | 0.0468 | 0.0077 | 1.13E-09 |  | -0.0576 | 0.0119 | 9.87E-05 | 37.09 |
| rs679880 | A | G | 0.0495 | 0.0089 | 2.53E-08 |  | 0.3613 | 0.0143 | 8.26E-05 | 31.04 |
| rs76229479 | C | A | -0.0780 | 0.0131 | 2.64E-09 |  | 0.1641 | 0.0181 | 9.43E-05 | 35.44 |
| **4EBP1** |  |  |  |  |  |  |  |  |  |  |
| rs10507084 | T | C | 0.0647 | 0.0100 | 8.23E-11 |  | 0.4742 | 0.0250 | 1.12E-04 | 42.20 |
| rs113955098 | A | G | -0.0994 | 0.0158 | 3.38E-10 |  | 0.5139 | 0.0434 | 1.05E-04 | 39.44 |
| rs114106239 | T | C | -0.1206 | 0.0212 | 1.19E-08 |  | 0.7049 | 0.0498 | 8.65E-05 | 32.51 |
| rs11981973 | G | A | 0.0613 | 0.0098 | 4.72E-10 |  | 0.1583 | 0.0157 | 1.03E-04 | 38.79 |
| rs1228509 | C | A | 0.0471 | 0.0081 | 6.41E-09 |  | -0.0042 | 0.0124 | 8.97E-05 | 33.71 |
| rs140896965 | T | C | -0.1125 | 0.0185 | 1.11E-09 |  | 0.3795 | 0.0586 | 9.88E-05 | 37.13 |
| rs6484367 | A | G | 0.0468 | 0.0077 | 1.13E-09 |  | 0.1003 | 0.0118 | 9.87E-05 | 37.09 |
| rs679880 | A | G | 0.0495 | 0.0089 | 2.53E-08 |  | 0.1655 | 0.0147 | 8.26E-05 | 31.04 |
| rs76229479 | C | A | -0.0780 | 0.0131 | 2.64E-09 |  | 0.0038 | 0.0185 | 9.43E-05 | 35.44 |
| **ADA** |  |  |  |  |  |  |  |  |  |  |
| rs10986730 | T | C | -0.0468 | 0.0077 | 1.16E-09 |  | -0.2073 | 0.0115 | 9.86E-05 | 37.03 |
| rs113955098 | A | G | -0.0994 | 0.0158 | 3.38E-10 |  | -0.1680 | 0.0420 | 1.05E-04 | 39.44 |
| rs13114985 | G | T | 0.0457 | 0.0081 | 2.01E-08 |  | -0.2693 | 0.0122 | 8.38E-05 | 31.48 |
| rs2016950 | T | C | -0.0586 | 0.0107 | 4.13E-08 |  | -0.3377 | 0.0164 | 8.01E-05 | 30.09 |
| rs2370982 | T | C | 0.0515 | 0.0089 | 7.97E-09 |  | -0.0835 | 0.0140 | 8.86E-05 | 33.28 |
| rs59333125 | C | A | -0.0816 | 0.0144 | 1.32E-08 |  | -0.1360 | 0.0238 | 8.60E-05 | 32.30 |
| rs60700772 | C | T | 0.0517 | 0.0092 | 2.20E-08 |  | -0.1296 | 0.0140 | 8.33E-05 | 31.31 |
| rs76229479 | C | A | -0.0780 | 0.0131 | 2.64E-09 |  | 0.0000 | 0.0181 | 9.43E-05 | 35.44 |
| **AXIN1** |  |  |  |  |  |  |  |  |  |  |
| rs10507084 | T | C | 0.0647 | 0.0100 | 8.23E-11 |  | 0.1946 | 0.0251 | 1.12E-04 | 42.20 |
| rs10986730 | T | C | -0.0468 | 0.0077 | 1.16E-09 |  | 0.1004 | 0.0131 | 9.86E-05 | 37.03 |
| rs11075985 | A | C | 0.0821 | 0.0077 | 2.15E-26 |  | 0.1950 | 0.0132 | 3.01E-04 | 113.01 |
| rs113955098 | A | G | -0.0994 | 0.0158 | 3.38E-10 |  | 0.5512 | 0.0457 | 1.05E-04 | 39.44 |
| rs114106239 | T | C | -0.1206 | 0.0212 | 1.19E-08 |  | 0.4478 | 0.0543 | 8.65E-05 | 32.51 |
| rs11981973 | G | A | 0.0613 | 0.0098 | 4.72E-10 |  | 0.5107 | 0.0173 | 1.03E-04 | 38.79 |
| rs1228509 | C | A | 0.0471 | 0.0081 | 6.41E-09 |  | 0.0552 | 0.0140 | 8.97E-05 | 33.71 |
| rs13114985 | G | T | 0.0457 | 0.0081 | 2.01E-08 |  | 0.0810 | 0.0137 | 8.38E-05 | 31.48 |
| rs140896965 | T | C | -0.1125 | 0.0185 | 1.11E-09 |  | -0.3990 | 0.0629 | 9.88E-05 | 37.13 |
| rs2016950 | T | C | -0.0586 | 0.0107 | 4.13E-08 |  | -0.0802 | 0.0187 | 8.01E-05 | 30.09 |
| rs2370982 | T | C | 0.0515 | 0.0089 | 7.97E-09 |  | -0.6503 | 0.0158 | 8.86E-05 | 33.28 |
| rs59333125 | C | A | -0.0816 | 0.0144 | 1.32E-08 |  | -0.1814 | 0.0270 | 8.60E-05 | 32.30 |
| rs60700772 | C | T | 0.0517 | 0.0092 | 2.20E-08 |  | 0.2476 | 0.0158 | 8.33E-05 | 31.31 |
| rs61873510 | T | G | 0.0464 | 0.0084 | 3.28E-08 |  | 0.0538 | 0.0148 | 8.13E-05 | 30.53 |
| rs6484367 | A | G | 0.0468 | 0.0077 | 1.13E-09 |  | 0.0085 | 0.0133 | 9.87E-05 | 37.09 |
| rs679880 | A | G | 0.0495 | 0.0089 | 2.53E-08 |  | -0.2382 | 0.0165 | 8.26E-05 | 31.04 |
| rs76229479 | C | A | -0.0780 | 0.0131 | 2.64E-09 |  | 0.2513 | 0.0204 | 9.43E-05 | 35.44 |
| **CASP-8** |  |  |  |  |  |  |  |  |  |  |
| rs10986730 | T | C | -0.0468 | 0.0077 | 1.16E-09 |  | 0.0534 | 0.0118 | 9.86E-05 | 37.03 |
| rs113955098 | A | G | -0.0994 | 0.0158 | 3.38E-10 |  | 0.0966 | 0.0431 | 1.05E-04 | 39.44 |
| rs114106239 | T | C | -0.1206 | 0.0212 | 1.19E-08 |  | 0.0738 | 0.0495 | 8.65E-05 | 32.51 |
| rs1228509 | C | A | 0.0471 | 0.0081 | 6.41E-09 |  | 0.1062 | 0.0123 | 8.97E-05 | 33.71 |
| rs13114985 | G | T | 0.0457 | 0.0081 | 2.01E-08 |  | -0.0898 | 0.0121 | 8.38E-05 | 31.48 |
| rs140896965 | T | C | -0.1125 | 0.0185 | 1.11E-09 |  | 0.4613 | 0.0593 | 9.88E-05 | 37.13 |
| rs2016950 | T | C | -0.0586 | 0.0107 | 4.13E-08 |  | -0.2865 | 0.0167 | 8.01E-05 | 30.09 |
| rs2370982 | T | C | 0.0515 | 0.0089 | 7.97E-09 |  | -0.2660 | 0.0143 | 8.86E-05 | 33.28 |
| rs59333125 | C | A | -0.0816 | 0.0144 | 1.32E-08 |  | -0.2709 | 0.0237 | 8.60E-05 | 32.30 |
| rs60700772 | C | T | 0.0517 | 0.0092 | 2.20E-08 |  | 0.1470 | 0.0143 | 8.33E-05 | 31.31 |
| rs61873510 | T | G | 0.0464 | 0.0084 | 3.28E-08 |  | -0.1788 | 0.0130 | 8.13E-05 | 30.53 |
| rs6484367 | A | G | 0.0468 | 0.0077 | 1.13E-09 |  | -0.2263 | 0.0118 | 9.87E-05 | 37.09 |
| rs679880 | A | G | 0.0495 | 0.0089 | 2.53E-08 |  | 0.0848 | 0.0146 | 8.26E-05 | 31.04 |
| rs76229479 | C | A | -0.0780 | 0.0131 | 2.64E-09 |  | 0.0833 | 0.0185 | 9.43E-05 | 35.44 |
| **CD5** |  |  |  |  |  |  |  |  |  |  |
| rs10507084 | T | C | 0.0647 | 0.0100 | 8.23E-11 |  | 0.0216 | 0.0252 | 1.12E-04 | 42.20 |
| rs11075985 | A | C | 0.0821 | 0.0077 | 2.15E-26 |  | 0.0865 | 0.0115 | 3.01E-04 | 113.01 |
| rs113955098 | A | G | -0.0994 | 0.0158 | 3.38E-10 |  | 0.2343 | 0.0422 | 1.05E-04 | 39.44 |
| rs114106239 | T | C | -0.1206 | 0.0212 | 1.19E-08 |  | 0.5631 | 0.0497 | 8.65E-05 | 32.51 |
| rs11981973 | G | A | 0.0613 | 0.0098 | 4.72E-10 |  | 0.0881 | 0.0152 | 1.03E-04 | 38.79 |
| rs1228509 | C | A | 0.0471 | 0.0081 | 6.41E-09 |  | 0.0977 | 0.0123 | 8.97E-05 | 33.71 |
| rs140896965 | T | C | -0.1125 | 0.0185 | 1.11E-09 |  | 0.8407 | 0.0598 | 9.88E-05 | 37.13 |
| rs2370982 | T | C | 0.0515 | 0.0089 | 7.97E-09 |  | 0.1281 | 0.0140 | 8.86E-05 | 33.28 |
| rs60700772 | C | T | 0.0517 | 0.0092 | 2.20E-08 |  | 0.0677 | 0.0139 | 8.33E-05 | 31.31 |
| rs61873510 | T | G | 0.0464 | 0.0084 | 3.28E-08 |  | 0.0366 | 0.0130 | 8.13E-05 | 30.53 |
| rs76229479 | C | A | -0.0780 | 0.0131 | 2.64E-09 |  | 0.2282 | 0.0180 | 9.43E-05 | 35.44 |
| **CD6** |  |  |  |  |  |  |  |  |  |  |
| rs10507084 | T | C | 0.0647 | 0.0100 | 8.23E-11 |  | 0.2085 | 0.0252 | 1.12E-04 | 42.20 |
| rs10986730 | T | C | -0.0468 | 0.0077 | 1.16E-09 |  | -0.5364 | 0.0117 | 9.86E-05 | 37.03 |
| rs1228509 | C | A | 0.0471 | 0.0081 | 6.41E-09 |  | 0.1125 | 0.0123 | 8.97E-05 | 33.71 |
| rs13114985 | G | T | 0.0457 | 0.0081 | 2.01E-08 |  | 0.1467 | 0.0121 | 8.38E-05 | 31.48 |
| rs140896965 | T | C | -0.1125 | 0.0185 | 1.11E-09 |  | 0.2995 | 0.0597 | 9.88E-05 | 37.13 |
| rs2016950 | T | C | -0.0586 | 0.0107 | 4.13E-08 |  | -0.0699 | 0.0166 | 8.01E-05 | 30.09 |
| rs2370982 | T | C | 0.0515 | 0.0089 | 7.97E-09 |  | 0.1281 | 0.0142 | 8.86E-05 | 33.28 |
| rs59333125 | C | A | -0.0816 | 0.0144 | 1.32E-08 |  | -0.5356 | 0.0237 | 8.60E-05 | 32.30 |
| rs60700772 | C | T | 0.0517 | 0.0092 | 2.20E-08 |  | 0.0812 | 0.0142 | 8.33E-05 | 31.31 |
| rs61873510 | T | G | 0.0464 | 0.0084 | 3.28E-08 |  | -0.1508 | 0.0130 | 8.13E-05 | 30.53 |
| rs6484367 | A | G | 0.0468 | 0.0077 | 1.13E-09 |  | -0.5102 | 0.0118 | 9.87E-05 | 37.09 |
| rs679880 | A | G | 0.0495 | 0.0089 | 2.53E-08 |  | 0.0969 | 0.0145 | 8.26E-05 | 31.04 |
| rs76229479 | C | A | -0.0780 | 0.0131 | 2.64E-09 |  | 0.1603 | 0.0183 | 9.43E-05 | 35.44 |
| **CD40** |  |  |  |  |  |  |  |  |  |  |
| rs10507084 | T | C | 0.0647 | 0.0100 | 8.23E-11 |  | 0.3630 | 0.0250 | 1.12E-04 | 42.20 |
| rs10986730 | T | C | -0.0468 | 0.0077 | 1.16E-09 |  | -0.3120 | 0.0113 | 9.86E-05 | 37.03 |
| rs113955098 | A | G | -0.0994 | 0.0158 | 3.38E-10 |  | 0.4385 | 0.0412 | 1.05E-04 | 39.44 |
| rs114106239 | T | C | -0.1206 | 0.0212 | 1.19E-08 |  | 0.3980 | 0.0493 | 8.65E-05 | 32.51 |
| rs11981973 | G | A | 0.0613 | 0.0098 | 4.72E-10 |  | 0.1387 | 0.0150 | 1.03E-04 | 38.79 |
| rs1228509 | C | A | 0.0471 | 0.0081 | 6.41E-09 |  | -0.1338 | 0.0122 | 8.97E-05 | 33.71 |
| rs13114985 | G | T | 0.0457 | 0.0081 | 2.01E-08 |  | 0.1511 | 0.0121 | 8.38E-05 | 31.48 |
| rs140896965 | T | C | -0.1125 | 0.0185 | 1.11E-09 |  | -0.3750 | 0.0583 | 9.88E-05 | 37.13 |
| rs2016950 | T | C | -0.0586 | 0.0107 | 4.13E-08 |  | -0.3155 | 0.0161 | 8.01E-05 | 30.09 |
| rs2370982 | T | C | 0.0515 | 0.0089 | 7.97E-09 |  | -0.1669 | 0.0137 | 8.86E-05 | 33.28 |
| rs59333125 | C | A | -0.0816 | 0.0144 | 1.32E-08 |  | -0.1851 | 0.0235 | 8.60E-05 | 32.30 |
| rs60700772 | C | T | 0.0517 | 0.0092 | 2.20E-08 |  | 0.2321 | 0.0137 | 8.33E-05 | 31.31 |
| rs61873510 | T | G | 0.0464 | 0.0084 | 3.28E-08 |  | 0.0280 | 0.0129 | 8.13E-05 | 30.53 |
| rs6484367 | A | G | 0.0468 | 0.0077 | 1.13E-09 |  | 0.0939 | 0.0117 | 9.87E-05 | 37.09 |
| rs679880 | A | G | 0.0495 | 0.0089 | 2.53E-08 |  | 0.0383 | 0.0141 | 8.26E-05 | 31.04 |
| rs76229479 | C | A | -0.0780 | 0.0131 | 2.64E-09 |  | -0.3872 | 0.0178 | 9.43E-05 | 35.44 |
| **CD244** |  |  |  |  |  |  |  |  |  |  |
| rs10507084 | T | C | 0.0647 | 0.0100 | 8.23E-11 |  | 0.3290 | 0.0253 | 1.12E-04 | 42.20 |
| rs11075985 | A | C | 0.0821 | 0.0077 | 2.15E-26 |  | 0.0585 | 0.0116 | 3.01E-04 | 113.01 |
| rs113955098 | A | G | -0.0994 | 0.0158 | 3.38E-10 |  | 0.0453 | 0.0424 | 1.05E-04 | 39.44 |
| rs114106239 | T | C | -0.1206 | 0.0212 | 1.19E-08 |  | 0.2861 | 0.0496 | 8.65E-05 | 32.51 |
| rs11981973 | G | A | 0.0613 | 0.0098 | 4.72E-10 |  | 0.1615 | 0.0153 | 1.03E-04 | 38.79 |
| rs1228509 | C | A | 0.0471 | 0.0081 | 6.41E-09 |  | -0.1614 | 0.0124 | 8.97E-05 | 33.71 |
| rs140896965 | T | C | -0.1125 | 0.0185 | 1.11E-09 |  | 0.8310 | 0.0603 | 9.88E-05 | 37.13 |
| rs2370982 | T | C | 0.0515 | 0.0089 | 7.97E-09 |  | 0.0155 | 0.0140 | 8.86E-05 | 33.28 |
| rs59333125 | C | A | -0.0816 | 0.0144 | 1.32E-08 |  | -0.1324 | 0.0239 | 8.60E-05 | 32.30 |
| rs60700772 | C | T | 0.0517 | 0.0092 | 2.20E-08 |  | 0.0677 | 0.0140 | 8.33E-05 | 31.31 |
| rs61873510 | T | G | 0.0464 | 0.0084 | 3.28E-08 |  | 0.2757 | 0.0130 | 8.13E-05 | 30.53 |
| rs6484367 | A | G | 0.0468 | 0.0077 | 1.13E-09 |  | -0.1238 | 0.0119 | 9.87E-05 | 37.09 |
| rs76229479 | C | A | -0.0780 | 0.0131 | 2.64E-09 |  | 0.2039 | 0.0181 | 9.43E-05 | 35.44 |
| **CDCP1** |  |  |  |  |  |  |  |  |  |  |
| rs10507084 | T | C | 0.0647 | 0.0100 | 8.23E-11 |  | -0.1004 | 0.0240 | 1.12E-04 | 42.20 |
| rs11075985 | A | C | 0.0821 | 0.0077 | 2.15E-26 |  | 0.0780 | 0.0113 | 3.01E-04 | 113.01 |
| rs113955098 | A | G | -0.0994 | 0.0158 | 3.38E-10 |  | 0.2776 | 0.0407 | 1.05E-04 | 39.44 |
| rs114106239 | T | C | -0.1206 | 0.0212 | 1.19E-08 |  | -0.1799 | 0.0488 | 8.65E-05 | 32.51 |
| rs1228509 | C | A | 0.0471 | 0.0081 | 6.41E-09 |  | -0.0573 | 0.0119 | 8.97E-05 | 33.71 |
| rs13114985 | G | T | 0.0457 | 0.0081 | 2.01E-08 |  | -0.0898 | 0.0118 | 8.38E-05 | 31.48 |
| rs140896965 | T | C | -0.1125 | 0.0185 | 1.11E-09 |  | 0.1804 | 0.0534 | 9.88E-05 | 37.13 |
| rs2016950 | T | C | -0.0586 | 0.0107 | 4.13E-08 |  | -0.2507 | 0.0160 | 8.01E-05 | 30.09 |
| rs2370982 | T | C | 0.0515 | 0.0089 | 7.97E-09 |  | 0.2388 | 0.0137 | 8.86E-05 | 33.28 |
| rs59333125 | C | A | -0.0816 | 0.0144 | 1.32E-08 |  | 0.1459 | 0.0228 | 8.60E-05 | 32.30 |
| rs60700772 | C | T | 0.0517 | 0.0092 | 2.20E-08 |  | -0.0251 | 0.0137 | 8.33E-05 | 31.31 |
| rs61873510 | T | G | 0.0464 | 0.0084 | 3.28E-08 |  | 0.0668 | 0.0126 | 8.13E-05 | 30.53 |
| rs6484367 | A | G | 0.0468 | 0.0077 | 1.13E-09 |  | -0.0512 | 0.0114 | 9.87E-05 | 37.09 |
| rs679880 | A | G | 0.0495 | 0.0089 | 2.53E-08 |  | 0.2038 | 0.0140 | 8.26E-05 | 31.04 |
| rs76229479 | C | A | -0.0780 | 0.0131 | 2.64E-09 |  | 0.1077 | 0.0178 | 9.43E-05 | 35.44 |
| **CST5** |  |  |  |  |  |  |  |  |  |  |
| rs10986730 | T | C | -0.0468 | 0.0077 | 1.16E-09 |  | -0.3697 | 0.0115 | 9.86E-05 | 37.03 |
| rs113955098 | A | G | -0.0994 | 0.0158 | 3.38E-10 |  | -0.6769 | 0.0425 | 1.05E-04 | 39.44 |
| rs114106239 | T | C | -0.1206 | 0.0212 | 1.19E-08 |  | -0.4196 | 0.0492 | 8.65E-05 | 32.51 |
| rs1228509 | C | A | 0.0471 | 0.0081 | 6.41E-09 |  | 0.0276 | 0.0122 | 8.97E-05 | 33.71 |
| rs13114985 | G | T | 0.0457 | 0.0081 | 2.01E-08 |  | 0.1445 | 0.0120 | 8.38E-05 | 31.48 |
| rs140896965 | T | C | -0.1125 | 0.0185 | 1.11E-09 |  | 0.7616 | 0.0592 | 9.88E-05 | 37.13 |
| rs2016950 | T | C | -0.0586 | 0.0107 | 4.13E-08 |  | -0.1006 | 0.0163 | 8.01E-05 | 30.09 |
| rs2370982 | T | C | 0.0515 | 0.0089 | 7.97E-09 |  | -0.3320 | 0.0139 | 8.86E-05 | 33.28 |
| rs59333125 | C | A | -0.0816 | 0.0144 | 1.32E-08 |  | 0.1324 | 0.0234 | 8.60E-05 | 32.30 |
| rs60700772 | C | T | 0.0517 | 0.0092 | 2.20E-08 |  | -0.3366 | 0.0139 | 8.33E-05 | 31.31 |
| rs61873510 | T | G | 0.0464 | 0.0084 | 3.28E-08 |  | 0.3554 | 0.0128 | 8.13E-05 | 30.53 |
| rs6484367 | A | G | 0.0468 | 0.0077 | 1.13E-09 |  | 0.2092 | 0.0117 | 9.87E-05 | 37.09 |
| rs76229479 | C | A | -0.0780 | 0.0131 | 2.64E-09 |  | -0.2398 | 0.0180 | 9.43E-05 | 35.44 |
| **EN-RAGE** |  |  |  |  |  |  |  |  |  |  |
| rs10507084 | T | C | 0.0647 | 0.0100 | 8.23E-11 |  | 0.7336 | 0.0250 | 1.12E-04 | 42.20 |
| rs10986730 | T | C | -0.0468 | 0.0077 | 1.16E-09 |  | -0.0363 | 0.0118 | 9.86E-05 | 37.03 |
| rs11075985 | A | C | 0.0821 | 0.0077 | 2.15E-26 |  | -0.1523 | 0.0118 | 3.01E-04 | 113.01 |
| rs113955098 | A | G | -0.0994 | 0.0158 | 3.38E-10 |  | 0.4204 | 0.0434 | 1.05E-04 | 39.44 |
| rs114106239 | T | C | -0.1206 | 0.0212 | 1.19E-08 |  | -0.0589 | 0.0497 | 8.65E-05 | 32.51 |
| rs11981973 | G | A | 0.0613 | 0.0098 | 4.72E-10 |  | -0.0848 | 0.0156 | 1.03E-04 | 38.79 |
| rs1228509 | C | A | 0.0471 | 0.0081 | 6.41E-09 |  | 0.2123 | 0.0124 | 8.97E-05 | 33.71 |
| rs13114985 | G | T | 0.0457 | 0.0081 | 2.01E-08 |  | -0.1357 | 0.0122 | 8.38E-05 | 31.48 |
| rs140896965 | T | C | -0.1125 | 0.0185 | 1.11E-09 |  | -0.7972 | 0.0583 | 9.88E-05 | 37.13 |
| rs2016950 | T | C | -0.0586 | 0.0107 | 4.13E-08 |  | -0.4775 | 0.0168 | 8.01E-05 | 30.09 |
| rs2370982 | T | C | 0.0515 | 0.0089 | 7.97E-09 |  | 0.3417 | 0.0144 | 8.86E-05 | 33.28 |
| rs59333125 | C | A | -0.0816 | 0.0144 | 1.32E-08 |  | -0.1630 | 0.0237 | 8.60E-05 | 32.30 |
| rs60700772 | C | T | 0.0517 | 0.0092 | 2.20E-08 |  | 0.1857 | 0.0143 | 8.33E-05 | 31.31 |
| rs61873510 | T | G | 0.0464 | 0.0084 | 3.28E-08 |  | -0.1852 | 0.0130 | 8.13E-05 | 30.53 |
| rs6484367 | A | G | 0.0468 | 0.0077 | 1.13E-09 |  | 0.0064 | 0.0118 | 9.87E-05 | 37.09 |
| rs679880 | A | G | 0.0495 | 0.0089 | 2.53E-08 |  | -0.2503 | 0.0146 | 8.26E-05 | 31.04 |
| rs76229479 | C | A | -0.0780 | 0.0131 | 2.64E-09 |  | 0.1372 | 0.0185 | 9.43E-05 | 35.44 |
| **IFN-gamma** |  |  |  |  |  |  |  |  |  |  |
| rs10507084 | T | C | 0.0647 | 0.0100 | 8.23E-11 |  | -0.4942 | 0.0251 | 1.12E-04 | 42.20 |
| rs10986730 | T | C | -0.0468 | 0.0077 | 1.16E-09 |  | -0.0769 | 0.0128 | 9.86E-05 | 37.03 |
| rs11075985 | A | C | 0.0821 | 0.0077 | 2.15E-26 |  | -0.0183 | 0.0128 | 3.01E-04 | 113.01 |
| rs113955098 | A | G | -0.0994 | 0.0158 | 3.38E-10 |  | 0.1690 | 0.0442 | 1.05E-04 | 39.44 |
| rs114106239 | T | C | -0.1206 | 0.0212 | 1.19E-08 |  | -0.4785 | 0.0543 | 8.65E-05 | 32.51 |
| rs11981973 | G | A | 0.0613 | 0.0098 | 4.72E-10 |  | 0.0424 | 0.0169 | 1.03E-04 | 38.79 |
| rs1228509 | C | A | 0.0471 | 0.0081 | 6.41E-09 |  | -0.2230 | 0.0140 | 8.97E-05 | 33.71 |
| rs13114985 | G | T | 0.0457 | 0.0081 | 2.01E-08 |  | 0.0328 | 0.0137 | 8.38E-05 | 31.48 |
| rs140896965 | T | C | -0.1125 | 0.0185 | 1.11E-09 |  | 0.7403 | 0.0619 | 9.88E-05 | 37.13 |
| rs2016950 | T | C | -0.0586 | 0.0107 | 4.13E-08 |  | 0.1433 | 0.0182 | 8.01E-05 | 30.09 |
| rs2370982 | T | C | 0.0515 | 0.0089 | 7.97E-09 |  | 0.1572 | 0.0153 | 8.86E-05 | 33.28 |
| rs59333125 | C | A | -0.0816 | 0.0144 | 1.32E-08 |  | -0.2145 | 0.0270 | 8.60E-05 | 32.30 |
| rs60700772 | C | T | 0.0517 | 0.0092 | 2.20E-08 |  | -0.0406 | 0.0153 | 8.33E-05 | 31.31 |
| rs61873510 | T | G | 0.0464 | 0.0084 | 3.28E-08 |  | 0.6009 | 0.0148 | 8.13E-05 | 30.53 |
| rs6484367 | A | G | 0.0468 | 0.0077 | 1.13E-09 |  | 0.5678 | 0.0133 | 9.87E-05 | 37.09 |
| rs679880 | A | G | 0.0495 | 0.0089 | 2.53E-08 |  | 0.0202 | 0.0160 | 8.26E-05 | 31.04 |
| rs76229479 | C | A | -0.0780 | 0.0131 | 2.64E-09 |  | 0.2667 | 0.0198 | 9.43E-05 | 35.44 |
| **MMP-1** |  |  |  |  |  |  |  |  |  |  |
| rs10507084 | T | C | 0.0647 | 0.0100 | 8.23E-11 |  | -0.4263 | 0.0252 | 1.12E-04 | 42.20 |
| rs10986730 | T | C | -0.0468 | 0.0077 | 1.16E-09 |  | -0.2158 | 0.0118 | 9.86E-05 | 37.03 |
| rs11075985 | A | C | 0.0821 | 0.0077 | 2.15E-26 |  | 0.1414 | 0.0119 | 3.01E-04 | 113.01 |
| rs113955098 | A | G | -0.0994 | 0.0158 | 3.38E-10 |  | -0.6638 | 0.0435 | 1.05E-04 | 39.44 |
| rs114106239 | T | C | -0.1206 | 0.0212 | 1.19E-08 |  | -0.1816 | 0.0497 | 8.65E-05 | 32.51 |
| rs11981973 | G | A | 0.0613 | 0.0098 | 4.72E-10 |  | -0.1501 | 0.0157 | 1.03E-04 | 38.79 |
| rs1228509 | C | A | 0.0471 | 0.0081 | 6.41E-09 |  | 0.0085 | 0.0124 | 8.97E-05 | 33.71 |
| rs13114985 | G | T | 0.0457 | 0.0081 | 2.01E-08 |  | 0.1970 | 0.0122 | 8.38E-05 | 31.48 |
| rs140896965 | T | C | -0.1125 | 0.0185 | 1.11E-09 |  | -0.7563 | 0.0602 | 9.88E-05 | 37.13 |
| rs2016950 | T | C | -0.0586 | 0.0107 | 4.13E-08 |  | 0.0290 | 0.0168 | 8.01E-05 | 30.09 |
| rs2370982 | T | C | 0.0515 | 0.0089 | 7.97E-09 |  | -0.0291 | 0.0144 | 8.86E-05 | 33.28 |
| rs59333125 | C | A | -0.0816 | 0.0144 | 1.32E-08 |  | -0.5074 | 0.0239 | 8.60E-05 | 32.30 |
| rs60700772 | C | T | 0.0517 | 0.0092 | 2.20E-08 |  | 0.2495 | 0.0144 | 8.33E-05 | 31.31 |
| rs61873510 | T | G | 0.0464 | 0.0084 | 3.28E-08 |  | -0.0775 | 0.0131 | 8.13E-05 | 30.53 |
| rs6484367 | A | G | 0.0468 | 0.0077 | 1.13E-09 |  | -0.0598 | 0.0119 | 9.87E-05 | 37.09 |
| rs679880 | A | G | 0.0495 | 0.0089 | 2.53E-08 |  | -0.1736 | 0.0147 | 8.26E-05 | 31.04 |
| rs76229479 | C | A | -0.0780 | 0.0131 | 2.64E-09 |  | -0.2359 | 0.0186 | 9.43E-05 | 35.44 |
| **MMP-10** |  |  |  |  |  |  |  |  |  |  |
| rs10507084 | T | C | 0.0647 | 0.0100 | 8.23E-11 |  | 0.2255 | 0.0252 | 1.12E-04 | 42.20 |
| rs10986730 | T | C | -0.0468 | 0.0077 | 1.16E-09 |  | -0.5919 | 0.0118 | 9.86E-05 | 37.03 |
| rs11075985 | A | C | 0.0821 | 0.0077 | 2.15E-26 |  | -0.1962 | 0.0118 | 3.01E-04 | 113.01 |
| rs113955098 | A | G | -0.0994 | 0.0158 | 3.38E-10 |  | 0.0352 | 0.0432 | 1.05E-04 | 39.44 |
| rs114106239 | T | C | -0.1206 | 0.0212 | 1.19E-08 |  | -0.1998 | 0.0496 | 8.65E-05 | 32.51 |
| rs11981973 | G | A | 0.0613 | 0.0098 | 4.72E-10 |  | -0.5450 | 0.0156 | 1.03E-04 | 38.79 |
| rs1228509 | C | A | 0.0471 | 0.0081 | 6.41E-09 |  | 0.3079 | 0.0124 | 8.97E-05 | 33.71 |
| rs13114985 | G | T | 0.0457 | 0.0081 | 2.01E-08 |  | -0.0635 | 0.0122 | 8.38E-05 | 31.48 |
| rs140896965 | T | C | -0.1125 | 0.0185 | 1.11E-09 |  | -0.3511 | 0.0599 | 9.88E-05 | 37.13 |
| rs2016950 | T | C | -0.0586 | 0.0107 | 4.13E-08 |  | 0.0119 | 0.0167 | 8.01E-05 | 30.09 |
| rs2370982 | T | C | 0.0515 | 0.0089 | 7.97E-09 |  | -0.4620 | 0.0143 | 8.86E-05 | 33.28 |
| rs59333125 | C | A | -0.0816 | 0.0144 | 1.32E-08 |  | 0.1054 | 0.0238 | 8.60E-05 | 32.30 |
| rs60700772 | C | T | 0.0517 | 0.0092 | 2.20E-08 |  | 0.2128 | 0.0143 | 8.33E-05 | 31.31 |
| rs61873510 | T | G | 0.0464 | 0.0084 | 3.28E-08 |  | 0.2800 | 0.0130 | 8.13E-05 | 30.53 |
| rs6484367 | A | G | 0.0468 | 0.0077 | 1.13E-09 |  | 0.4099 | 0.0118 | 9.87E-05 | 37.09 |
| rs679880 | A | G | 0.0495 | 0.0089 | 2.53E-08 |  | 0.2260 | 0.0146 | 8.26E-05 | 31.04 |
| rs76229479 | C | A | -0.0780 | 0.0131 | 2.64E-09 |  | -0.2257 | 0.0184 | 9.43E-05 | 35.44 |
| **OPG** |  |  |  |  |  |  |  |  |  |  |
| rs10507084 | T | C | 0.0647 | 0.0100 | 8.23E-11 |  | 0.7228 | 0.0239 | 1.12E-04 | 42.20 |
| rs10986730 | T | C | -0.0468 | 0.0077 | 1.16E-09 |  | -0.3526 | 0.0112 | 9.86E-05 | 37.03 |
| rs11075985 | A | C | 0.0821 | 0.0077 | 2.15E-26 |  | 0.1036 | 0.0112 | 3.01E-04 | 113.01 |
| rs113955098 | A | G | -0.0994 | 0.0158 | 3.38E-10 |  | -0.2806 | 0.0400 | 1.05E-04 | 39.44 |
| rs114106239 | T | C | -0.1206 | 0.0212 | 1.19E-08 |  | 0.0539 | 0.0486 | 8.65E-05 | 32.51 |
| rs11981973 | G | A | 0.0613 | 0.0098 | 4.72E-10 |  | -0.2807 | 0.0148 | 1.03E-04 | 38.79 |
| rs1228509 | C | A | 0.0471 | 0.0081 | 6.41E-09 |  | -0.0849 | 0.0118 | 8.97E-05 | 33.71 |
| rs13114985 | G | T | 0.0457 | 0.0081 | 2.01E-08 |  | -0.3021 | 0.0117 | 8.38E-05 | 31.48 |
| rs140896965 | T | C | -0.1125 | 0.0185 | 1.11E-09 |  | 0.6097 | 0.0527 | 9.88E-05 | 37.13 |
| rs2016950 | T | C | -0.0586 | 0.0107 | 4.13E-08 |  | -0.2064 | 0.0158 | 8.01E-05 | 30.09 |
| rs2370982 | T | C | 0.0515 | 0.0089 | 7.97E-09 |  | -0.4135 | 0.0135 | 8.86E-05 | 33.28 |
| rs59333125 | C | A | -0.0816 | 0.0144 | 1.32E-08 |  | -0.2378 | 0.0226 | 8.60E-05 | 32.30 |
| rs60700772 | C | T | 0.0517 | 0.0092 | 2.20E-08 |  | -0.0039 | 0.0135 | 8.33E-05 | 31.31 |
| rs61873510 | T | G | 0.0464 | 0.0084 | 3.28E-08 |  | 0.3166 | 0.0125 | 8.13E-05 | 30.53 |
| rs6484367 | A | G | 0.0468 | 0.0077 | 1.13E-09 |  | 0.0299 | 0.0114 | 9.87E-05 | 37.09 |
| rs679880 | A | G | 0.0495 | 0.0089 | 2.53E-08 |  | 0.2624 | 0.0138 | 8.26E-05 | 31.04 |
| rs76229479 | C | A | -0.0780 | 0.0131 | 2.64E-09 |  | -0.3680 | 0.0176 | 9.43E-05 | 35.44 |
| **OSM** |  |  |  |  |  |  |  |  |  |  |
| rs10507084 | T | C | 0.0647 | 0.0100 | 8.23E-11 |  | 0.5128 | 0.0252 | 1.12E-04 | 42.20 |
| rs113955098 | A | G | -0.0994 | 0.0158 | 3.38E-10 |  | -0.2907 | 0.0436 | 1.05E-04 | 39.44 |
| rs114106239 | T | C | -0.1206 | 0.0212 | 1.19E-08 |  | 0.2496 | 0.0497 | 8.65E-05 | 32.51 |
| rs11981973 | G | A | 0.0613 | 0.0098 | 4.72E-10 |  | -0.0277 | 0.0156 | 1.03E-04 | 38.79 |
| rs1228509 | C | A | 0.0471 | 0.0081 | 6.41E-09 |  | 0.2591 | 0.0124 | 8.97E-05 | 33.71 |
| rs13114985 | G | T | 0.0457 | 0.0081 | 2.01E-08 |  | 0.1861 | 0.0122 | 8.38E-05 | 31.48 |
| rs140896965 | T | C | -0.1125 | 0.0185 | 1.11E-09 |  | -0.1911 | 0.0598 | 9.88E-05 | 37.13 |
| rs2370982 | T | C | 0.0515 | 0.0089 | 7.97E-09 |  | 0.2349 | 0.0144 | 8.86E-05 | 33.28 |
| rs59333125 | C | A | -0.0816 | 0.0144 | 1.32E-08 |  | -0.0882 | 0.0238 | 8.60E-05 | 32.30 |
| rs60700772 | C | T | 0.0517 | 0.0092 | 2.20E-08 |  | 0.0193 | 0.0143 | 8.33E-05 | 31.31 |
| rs6484367 | A | G | 0.0468 | 0.0077 | 1.13E-09 |  | 0.2412 | 0.0119 | 9.87E-05 | 37.09 |
| rs679880 | A | G | 0.0495 | 0.0089 | 2.53E-08 |  | -0.0061 | 0.0147 | 8.26E-05 | 31.04 |
| rs76229479 | C | A | -0.0780 | 0.0131 | 2.64E-09 |  | 0.0333 | 0.0185 | 9.43E-05 | 35.44 |
| **PD-L1** |  |  |  |  |  |  |  |  |  |  |
| rs10507084 | T | C | 0.0647 | 0.0100 | 8.23E-11 |  | 0.5668 | 0.0251 | 1.12E-04 | 42.20 |
| rs10986730 | T | C | -0.0468 | 0.0077 | 1.16E-09 |  | -0.0919 | 0.0115 | 9.86E-05 | 37.03 |
| rs113955098 | A | G | -0.0994 | 0.0158 | 3.38E-10 |  | 0.0523 | 0.0423 | 1.05E-04 | 39.44 |
| rs114106239 | T | C | -0.1206 | 0.0212 | 1.19E-08 |  | 0.4063 | 0.0496 | 8.65E-05 | 32.51 |
| rs1228509 | C | A | 0.0471 | 0.0081 | 6.41E-09 |  | -0.1189 | 0.0123 | 8.97E-05 | 33.71 |
| rs140896965 | T | C | -0.1125 | 0.0185 | 1.11E-09 |  | 0.2764 | 0.0588 | 9.88E-05 | 37.13 |
| rs2016950 | T | C | -0.0586 | 0.0107 | 4.13E-08 |  | -0.0546 | 0.0164 | 8.01E-05 | 30.09 |
| rs2370982 | T | C | 0.0515 | 0.0089 | 7.97E-09 |  | -0.0272 | 0.0140 | 8.86E-05 | 33.28 |
| rs59333125 | C | A | -0.0816 | 0.0144 | 1.32E-08 |  | -0.3799 | 0.0236 | 8.60E-05 | 32.30 |
| rs60700772 | C | T | 0.0517 | 0.0092 | 2.20E-08 |  | 0.1393 | 0.0139 | 8.33E-05 | 31.31 |
| rs61873510 | T | G | 0.0464 | 0.0084 | 3.28E-08 |  | 0.0517 | 0.0129 | 8.13E-05 | 30.53 |
| rs6484367 | A | G | 0.0468 | 0.0077 | 1.13E-09 |  | -0.0747 | 0.0118 | 9.87E-05 | 37.09 |
| rs679880 | A | G | 0.0495 | 0.0089 | 2.53E-08 |  | -0.2967 | 0.0143 | 8.26E-05 | 31.04 |
| rs76229479 | C | A | -0.0780 | 0.0131 | 2.64E-09 |  | -0.2077 | 0.0180 | 9.43E-05 | 35.44 |
| **SIRT2** |  |  |  |  |  |  |  |  |  |  |
| rs10507084 | T | C | 0.0647 | 0.0100 | 8.23E-11 |  | 0.5159 | 0.0251 | 1.12E-04 | 42.20 |
| rs10986730 | T | C | -0.0468 | 0.0077 | 1.16E-09 |  | 0.0235 | 0.0117 | 9.86E-05 | 37.03 |
| rs11075985 | A | C | 0.0821 | 0.0077 | 2.15E-26 |  | 0.1926 | 0.0117 | 3.01E-04 | 113.01 |
| rs113955098 | A | G | -0.0994 | 0.0158 | 3.38E-10 |  | 0.4717 | 0.0429 | 1.05E-04 | 39.44 |
| rs114106239 | T | C | -0.1206 | 0.0212 | 1.19E-08 |  | 0.4984 | 0.0496 | 8.65E-05 | 32.51 |
| rs11981973 | G | A | 0.0613 | 0.0098 | 4.72E-10 |  | 0.2823 | 0.0155 | 1.03E-04 | 38.79 |
| rs1228509 | C | A | 0.0471 | 0.0081 | 6.41E-09 |  | -0.0637 | 0.0124 | 8.97E-05 | 33.71 |
| rs13114985 | G | T | 0.0457 | 0.0081 | 2.01E-08 |  | -0.1730 | 0.0122 | 8.38E-05 | 31.48 |
| rs140896965 | T | C | -0.1125 | 0.0185 | 1.11E-09 |  | 0.1653 | 0.0593 | 9.88E-05 | 37.13 |
| rs2016950 | T | C | -0.0586 | 0.0107 | 4.13E-08 |  | -0.0665 | 0.0167 | 8.01E-05 | 30.09 |
| rs59333125 | C | A | -0.0816 | 0.0144 | 1.32E-08 |  | -0.0711 | 0.0237 | 8.60E-05 | 32.30 |
| rs60700772 | C | T | 0.0517 | 0.0092 | 2.20E-08 |  | -0.0290 | 0.0142 | 8.33E-05 | 31.31 |
| rs61873510 | T | G | 0.0464 | 0.0084 | 3.28E-08 |  | -0.1378 | 0.0130 | 8.13E-05 | 30.53 |
| rs6484367 | A | G | 0.0468 | 0.0077 | 1.13E-09 |  | -0.1089 | 0.0118 | 9.87E-05 | 37.09 |
| rs679880 | A | G | 0.0495 | 0.0089 | 2.53E-08 |  | 0.1837 | 0.0146 | 8.26E-05 | 31.04 |
| rs76229479 | C | A | -0.0780 | 0.0131 | 2.64E-09 |  | 0.0731 | 0.0184 | 9.43E-05 | 35.44 |
| **SLAMF1** |  |  |  |  |  |  |  |  |  |  |
| rs10507084 | T | C | 0.0647 | 0.0100 | 8.23E-11 |  | 0.0031 | 0.0250 | 1.12E-04 | 42.20 |
| rs11075985 | A | C | 0.0821 | 0.0077 | 2.15E-26 |  | 0.1377 | 0.0117 | 3.01E-04 | 113.01 |
| rs113955098 | A | G | -0.0994 | 0.0158 | 3.38E-10 |  | -0.0382 | 0.0430 | 1.05E-04 | 39.44 |
| rs114106239 | T | C | -0.1206 | 0.0212 | 1.19E-08 |  | 0.2181 | 0.0496 | 8.65E-05 | 32.51 |
| rs1228509 | C | A | 0.0471 | 0.0081 | 6.41E-09 |  | 0.4056 | 0.0123 | 8.97E-05 | 33.71 |
| rs13114985 | G | T | 0.0457 | 0.0081 | 2.01E-08 |  | -0.1445 | 0.0122 | 8.38E-05 | 31.48 |
| rs140896965 | T | C | -0.1125 | 0.0185 | 1.11E-09 |  | 0.6354 | 0.0590 | 9.88E-05 | 37.13 |
| rs2370982 | T | C | 0.0515 | 0.0089 | 7.97E-09 |  | -0.2116 | 0.0142 | 8.86E-05 | 33.28 |
| rs60700772 | C | T | 0.0517 | 0.0092 | 2.20E-08 |  | 0.1857 | 0.0142 | 8.33E-05 | 31.31 |
| rs6484367 | A | G | 0.0468 | 0.0077 | 1.13E-09 |  | -0.1751 | 0.0118 | 9.87E-05 | 37.09 |
| rs679880 | A | G | 0.0495 | 0.0089 | 2.53E-08 |  | 0.3976 | 0.0145 | 8.26E-05 | 31.04 |
| rs76229479 | C | A | -0.0780 | 0.0131 | 2.64E-09 |  | 0.1885 | 0.0184 | 9.43E-05 | 35.44 |
| **ST1A1** |  |  |  |  |  |  |  |  |  |  |
| rs10507084 | T | C | 0.0647 | 0.0100 | 8.23E-11 |  | 0.3969 | 0.0253 | 1.12E-04 | 42.20 |
| rs10986730 | T | C | -0.0468 | 0.0077 | 1.16E-09 |  | 0.0641 | 0.0134 | 9.86E-05 | 37.03 |
| rs11075985 | A | C | 0.0821 | 0.0077 | 2.15E-26 |  | -0.0061 | 0.0134 | 3.01E-04 | 113.01 |
| rs113955098 | A | G | -0.0994 | 0.0158 | 3.38E-10 |  | 0.7523 | 0.0468 | 1.05E-04 | 39.44 |
| rs114106239 | T | C | -0.1206 | 0.0212 | 1.19E-08 |  | 0.0738 | 0.0543 | 8.65E-05 | 32.51 |
| rs11981973 | G | A | 0.0613 | 0.0098 | 4.72E-10 |  | 0.5401 | 0.0176 | 1.03E-04 | 38.79 |
| rs1228509 | C | A | 0.0471 | 0.0081 | 6.41E-09 |  | 0.1571 | 0.0140 | 8.97E-05 | 33.71 |
| rs13114985 | G | T | 0.0457 | 0.0081 | 2.01E-08 |  | -0.4181 | 0.0138 | 8.38E-05 | 31.48 |
| rs140896965 | T | C | -0.1125 | 0.0185 | 1.11E-09 |  | -0.3528 | 0.0649 | 9.88E-05 | 37.13 |
| rs2016950 | T | C | -0.0586 | 0.0107 | 4.13E-08 |  | -0.1791 | 0.0191 | 8.01E-05 | 30.09 |
| rs2370982 | T | C | 0.0515 | 0.0089 | 7.97E-09 |  | -0.4484 | 0.0161 | 8.86E-05 | 33.28 |
| rs59333125 | C | A | -0.0816 | 0.0144 | 1.32E-08 |  | -0.2096 | 0.0272 | 8.60E-05 | 32.30 |
| rs60700772 | C | T | 0.0517 | 0.0092 | 2.20E-08 |  | -0.0948 | 0.0162 | 8.33E-05 | 31.31 |
| rs61873510 | T | G | 0.0464 | 0.0084 | 3.28E-08 |  | -0.2692 | 0.0148 | 8.13E-05 | 30.53 |
| rs6484367 | A | G | 0.0468 | 0.0077 | 1.13E-09 |  | -0.4291 | 0.0134 | 9.87E-05 | 37.09 |
| rs679880 | A | G | 0.0495 | 0.0089 | 2.53E-08 |  | -0.1716 | 0.0168 | 8.26E-05 | 31.04 |
| rs76229479 | C | A | -0.0780 | 0.0131 | 2.64E-09 |  | 0.0846 | 0.0208 | 9.43E-05 | 35.44 |
| **STAMPB** |  |  |  |  |  |  |  |  |  |  |
| rs10986730 | T | C | -0.0468 | 0.0077 | 1.16E-09 |  | -0.0791 | 0.0116 | 9.86E-05 | 37.03 |
| rs1228509 | C | A | 0.0471 | 0.0081 | 6.41E-09 |  | -0.0913 | 0.0124 | 8.97E-05 | 33.71 |
| rs13114985 | G | T | 0.0457 | 0.0081 | 2.01E-08 |  | -0.1598 | 0.0122 | 8.38E-05 | 31.48 |
| rs140896965 | T | C | -0.1125 | 0.0185 | 1.11E-09 |  | 0.1777 | 0.0590 | 9.88E-05 | 37.13 |
| rs2016950 | T | C | -0.0586 | 0.0107 | 4.13E-08 |  | 0.0034 | 0.0165 | 8.01E-05 | 30.09 |
| rs2370982 | T | C | 0.0515 | 0.0089 | 7.97E-09 |  | -0.3883 | 0.0141 | 8.86E-05 | 33.28 |
| rs59333125 | C | A | -0.0816 | 0.0144 | 1.32E-08 |  | -0.0466 | 0.0237 | 8.60E-05 | 32.30 |
| rs60700772 | C | T | 0.0517 | 0.0092 | 2.20E-08 |  | -0.0832 | 0.0141 | 8.33E-05 | 31.31 |
| rs61873510 | T | G | 0.0464 | 0.0084 | 3.28E-08 |  | 0.0452 | 0.0130 | 8.13E-05 | 30.53 |
| rs6484367 | A | G | 0.0468 | 0.0077 | 1.13E-09 |  | -0.2071 | 0.0118 | 9.87E-05 | 37.09 |
| rs76229479 | C | A | -0.0780 | 0.0131 | 2.64E-09 |  | 0.0103 | 0.0182 | 9.43E-05 | 35.44 |
| **TNF** |  |  |  |  |  |  |  |  |  |  |
| rs10507084 | T | C | 0.0647 | 0.0100 | 8.23E-11 |  | 0.0757 | 0.0251 | 1.12E-04 | 42.20 |
| rs10986730 | T | C | -0.0468 | 0.0077 | 1.16E-09 |  | 0.1731 | 0.0130 | 9.86E-05 | 37.03 |
| rs11075985 | A | C | 0.0821 | 0.0077 | 2.15E-26 |  | 0.1243 | 0.0131 | 3.01E-04 | 113.01 |
| rs114106239 | T | C | -0.1206 | 0.0212 | 1.19E-08 |  | 0.5573 | 0.0544 | 8.65E-05 | 32.51 |
| rs1228509 | C | A | 0.0471 | 0.0081 | 6.41E-09 |  | 0.0149 | 0.0140 | 8.97E-05 | 33.71 |
| rs140896965 | T | C | -0.1125 | 0.0185 | 1.11E-09 |  | 1.0318 | 0.0622 | 9.88E-05 | 37.13 |
| rs2370982 | T | C | 0.0515 | 0.0089 | 7.97E-09 |  | 0.1301 | 0.0156 | 8.86E-05 | 33.28 |
| rs59333125 | C | A | -0.0816 | 0.0144 | 1.32E-08 |  | 0.2476 | 0.0270 | 8.60E-05 | 32.30 |
| rs679880 | A | G | 0.0495 | 0.0089 | 2.53E-08 |  | 0.1695 | 0.0164 | 8.26E-05 | 31.04 |
| **TNFB** |  |  |  |  |  |  |  |  |  |  |
| rs10507084 | T | C | 0.0647 | 0.0100 | 8.23E-11 |  | 0.2904 | 0.0252 | 1.12E-04 | 42.20 |
| rs10986730 | T | C | -0.0468 | 0.0077 | 1.16E-09 |  | 0.0150 | 0.0132 | 9.86E-05 | 37.03 |
| rs113955098 | A | G | -0.0994 | 0.0158 | 3.38E-10 |  | 0.2434 | 0.0458 | 1.05E-04 | 39.44 |
| rs114106239 | T | C | -0.1206 | 0.0212 | 1.19E-08 |  | 0.3350 | 0.0543 | 8.65E-05 | 32.51 |
| rs1228509 | C | A | 0.0471 | 0.0081 | 6.41E-09 |  | 0.4013 | 0.0140 | 8.97E-05 | 33.71 |
| rs140896965 | T | C | -0.1125 | 0.0185 | 1.11E-09 |  | -0.0400 | 0.0644 | 9.88E-05 | 37.13 |
| rs2370982 | T | C | 0.0515 | 0.0089 | 7.97E-09 |  | 0.1611 | 0.0158 | 8.86E-05 | 33.28 |
| rs60700772 | C | T | 0.0517 | 0.0092 | 2.20E-08 |  | 0.3675 | 0.0159 | 8.33E-05 | 31.31 |
| rs61873510 | T | G | 0.0464 | 0.0084 | 3.28E-08 |  | 0.2024 | 0.0148 | 8.13E-05 | 30.53 |
| rs6484367 | A | G | 0.0468 | 0.0077 | 1.13E-09 |  | 0.0171 | 0.0133 | 9.87E-05 | 37.09 |
| rs679880 | A | G | 0.0495 | 0.0089 | 2.53E-08 |  | 0.0848 | 0.0166 | 8.26E-05 | 31.04 |
| rs76229479 | C | A | -0.0780 | 0.0131 | 2.64E-09 |  | 0.0628 | 0.0205 | 9.43E-05 | 35.44 |
| **TNFRSF9** |  |  |  |  |  |  |  |  |  |  |
| rs10507084 | T | C | 0.0647 | 0.0100 | 8.23E-11 |  | 0.4680 | 0.0251 | 1.12E-04 | 42.20 |
| rs10986730 | T | C | -0.0468 | 0.0077 | 1.16E-09 |  | -0.3697 | 0.0131 | 9.86E-05 | 37.03 |
| rs11075985 | A | C | 0.0821 | 0.0077 | 2.15E-26 |  | 0.1633 | 0.0131 | 3.01E-04 | 113.01 |
| rs113955098 | A | G | -0.0994 | 0.0158 | 3.38E-10 |  | 0.3319 | 0.0455 | 1.05E-04 | 39.44 |
| rs114106239 | T | C | -0.1206 | 0.0212 | 1.19E-08 |  | -0.2106 | 0.0543 | 8.65E-05 | 32.51 |
| rs11981973 | G | A | 0.0613 | 0.0098 | 4.72E-10 |  | -0.2741 | 0.0172 | 1.03E-04 | 38.79 |
| rs1228509 | C | A | 0.0471 | 0.0081 | 6.41E-09 |  | 0.3313 | 0.0140 | 8.97E-05 | 33.71 |
| rs13114985 | G | T | 0.0457 | 0.0081 | 2.01E-08 |  | -0.1620 | 0.0137 | 8.38E-05 | 31.48 |
| rs140896965 | T | C | -0.1125 | 0.0185 | 1.11E-09 |  | 0.3973 | 0.0635 | 9.88E-05 | 37.13 |
| rs2016950 | T | C | -0.0586 | 0.0107 | 4.13E-08 |  | -0.5748 | 0.0187 | 8.01E-05 | 30.09 |
| rs2370982 | T | C | 0.0515 | 0.0089 | 7.97E-09 |  | 0.0388 | 0.0157 | 8.86E-05 | 33.28 |
| rs59333125 | C | A | -0.0816 | 0.0144 | 1.32E-08 |  | -0.1900 | 0.0271 | 8.60E-05 | 32.30 |
| rs60700772 | C | T | 0.0517 | 0.0092 | 2.20E-08 |  | 0.2341 | 0.0158 | 8.33E-05 | 31.31 |
| rs61873510 | T | G | 0.0464 | 0.0084 | 3.28E-08 |  | 0.4889 | 0.0147 | 8.13E-05 | 30.53 |
| rs6484367 | A | G | 0.0468 | 0.0077 | 1.13E-09 |  | 0.0576 | 0.0133 | 9.87E-05 | 37.09 |
| rs679880 | A | G | 0.0495 | 0.0089 | 2.53E-08 |  | 0.3492 | 0.0165 | 8.26E-05 | 31.04 |
| rs76229479 | C | A | -0.0780 | 0.0131 | 2.64E-09 |  | 0.1257 | 0.0203 | 9.43E-05 | 35.44 |
| **TNFSF14** |  |  |  |  |  |  |  |  |  |  |
| rs10507084 | T | C | 0.0647 | 0.0100 | 8.23E-11 |  | 0.4541 | 0.0252 | 1.12E-04 | 42.20 |
| rs113955098 | A | G | -0.0994 | 0.0158 | 3.38E-10 |  | 0.3389 | 0.0459 | 1.05E-04 | 39.44 |
| rs114106239 | T | C | -0.1206 | 0.0212 | 1.19E-08 |  | 0.2952 | 0.0543 | 8.65E-05 | 32.51 |
| rs11981973 | G | A | 0.0613 | 0.0098 | 4.72E-10 |  | 0.2464 | 0.0174 | 1.03E-04 | 38.79 |
| rs1228509 | C | A | 0.0471 | 0.0081 | 6.41E-09 |  | 0.2230 | 0.0140 | 8.97E-05 | 33.71 |
| rs13114985 | G | T | 0.0457 | 0.0081 | 2.01E-08 |  | -0.0525 | 0.0137 | 8.38E-05 | 31.48 |
| rs140896965 | T | C | -0.1125 | 0.0185 | 1.11E-09 |  | 0.2480 | 0.0642 | 9.88E-05 | 37.13 |
| rs59333125 | C | A | -0.0816 | 0.0144 | 1.32E-08 |  | -0.1348 | 0.0272 | 8.60E-05 | 32.30 |
| rs60700772 | C | T | 0.0517 | 0.0092 | 2.20E-08 |  | 0.0735 | 0.0159 | 8.33E-05 | 31.31 |
| rs6484367 | A | G | 0.0468 | 0.0077 | 1.13E-09 |  | 0.1516 | 0.0133 | 9.87E-05 | 37.09 |
| rs76229479 | C | A | -0.0780 | 0.0131 | 2.64E-09 |  | 0.0115 | 0.0205 | 9.43E-05 | 35.44 |
| **TRAIL** |  |  |  |  |  |  |  |  |  |  |
| rs10507084 | T | C | 0.0647 | 0.0100 | 8.23E-11 |  | -0.1622 | 0.0253 | 1.12E-04 | 42.20 |
| rs10986730 | T | C | -0.0468 | 0.0077 | 1.16E-09 |  | -0.2970 | 0.0116 | 9.86E-05 | 37.03 |
| rs11075985 | A | C | 0.0821 | 0.0077 | 2.15E-26 |  | 0.2632 | 0.0116 | 3.01E-04 | 113.01 |
| rs113955098 | A | G | -0.0994 | 0.0158 | 3.38E-10 |  | 0.1066 | 0.0425 | 1.05E-04 | 39.44 |
| rs114106239 | T | C | -0.1206 | 0.0212 | 1.19E-08 |  | 0.2131 | 0.0499 | 8.65E-05 | 32.51 |
| rs11981973 | G | A | 0.0613 | 0.0098 | 4.72E-10 |  | 0.1061 | 0.0154 | 1.03E-04 | 38.79 |
| rs1228509 | C | A | 0.0471 | 0.0081 | 6.41E-09 |  | 0.3079 | 0.0124 | 8.97E-05 | 33.71 |
| rs13114985 | G | T | 0.0457 | 0.0081 | 2.01E-08 |  | -0.6852 | 0.0122 | 8.38E-05 | 31.48 |
| rs140896965 | T | C | -0.1125 | 0.0185 | 1.11E-09 |  | 0.5359 | 0.0600 | 9.88E-05 | 37.13 |
| rs2016950 | T | C | -0.0586 | 0.0107 | 4.13E-08 |  | -0.2644 | 0.0165 | 8.01E-05 | 30.09 |
| rs2370982 | T | C | 0.0515 | 0.0089 | 7.97E-09 |  | 0.1456 | 0.0141 | 8.86E-05 | 33.28 |
| rs59333125 | C | A | -0.0816 | 0.0144 | 1.32E-08 |  | -0.1924 | 0.0238 | 8.60E-05 | 32.30 |
| rs60700772 | C | T | 0.0517 | 0.0092 | 2.20E-08 |  | 0.1586 | 0.0141 | 8.33E-05 | 31.31 |
| rs61873510 | T | G | 0.0464 | 0.0084 | 3.28E-08 |  | 0.0151 | 0.0130 | 8.13E-05 | 30.53 |
| rs6484367 | A | G | 0.0468 | 0.0077 | 1.13E-09 |  | 0.4462 | 0.0119 | 9.87E-05 | 37.09 |
| rs679880 | A | G | 0.0495 | 0.0089 | 2.53E-08 |  | 0.3229 | 0.0144 | 8.26E-05 | 31.04 |
| rs76229479 | C | A | -0.0780 | 0.0131 | 2.64E-09 |  | 0.1898 | 0.0182 | 9.43E-05 | 35.44 |
| **TRANCE** |  |  |  |  |  |  |  |  |  |  |
| rs10507084 | T | C | 0.0647 | 0.0100 | 8.23E-11 |  | 0.0402 | 0.0250 | 1.12E-04 | 42.20 |
| rs10986730 | T | C | -0.0468 | 0.0077 | 1.16E-09 |  | -0.0321 | 0.0117 | 9.86E-05 | 37.03 |
| rs11075985 | A | C | 0.0821 | 0.0077 | 2.15E-26 |  | 0.1036 | 0.0118 | 3.01E-04 | 113.01 |
| rs113955098 | A | G | -0.0994 | 0.0158 | 3.38E-10 |  | 1.0621 | 0.0428 | 1.05E-04 | 39.44 |
| rs114106239 | T | C | -0.1206 | 0.0212 | 1.19E-08 |  | 0.5921 | 0.0495 | 8.65E-05 | 32.51 |
| rs11981973 | G | A | 0.0613 | 0.0098 | 4.72E-10 |  | -0.0033 | 0.0155 | 1.03E-04 | 38.79 |
| rs1228509 | C | A | 0.0471 | 0.0081 | 6.41E-09 |  | 0.0403 | 0.0123 | 8.97E-05 | 33.71 |
| rs13114985 | G | T | 0.0457 | 0.0081 | 2.01E-08 |  | -0.0066 | 0.0121 | 8.38E-05 | 31.48 |
| rs140896965 | T | C | -0.1125 | 0.0185 | 1.11E-09 |  | 0.1004 | 0.0588 | 9.88E-05 | 37.13 |
| rs2016950 | T | C | -0.0586 | 0.0107 | 4.13E-08 |  | -0.2609 | 0.0167 | 8.01E-05 | 30.09 |
| rs2370982 | T | C | 0.0515 | 0.0089 | 7.97E-09 |  | 0.2135 | 0.0142 | 8.86E-05 | 33.28 |
| rs59333125 | C | A | -0.0816 | 0.0144 | 1.32E-08 |  | -0.2525 | 0.0236 | 8.60E-05 | 32.30 |
| rs60700772 | C | T | 0.0517 | 0.0092 | 2.20E-08 |  | 0.2437 | 0.0142 | 8.33E-05 | 31.31 |
| rs61873510 | T | G | 0.0464 | 0.0084 | 3.28E-08 |  | -0.2240 | 0.0130 | 8.13E-05 | 30.53 |
| rs6484367 | A | G | 0.0468 | 0.0077 | 1.13E-09 |  | -0.0021 | 0.0118 | 9.87E-05 | 37.09 |
| rs679880 | A | G | 0.0495 | 0.0089 | 2.53E-08 |  | -0.1171 | 0.0145 | 8.26E-05 | 31.04 |
| rs76229479 | C | A | -0.0780 | 0.0131 | 2.64E-09 |  | 0.0859 | 0.0184 | 9.43E-05 | 35.44 |
| **TSLP** |  |  |  |  |  |  |  |  |  |  |
| rs10507084 | T | C | 0.0647 | 0.0100 | 8.23E-11 |  | 0.3877 | 0.0252 | 1.12E-04 | 42.20 |
| rs10986730 | T | C | -0.0468 | 0.0077 | 1.16E-09 |  | -0.1816 | 0.0132 | 9.86E-05 | 37.03 |
| rs11075985 | A | C | 0.0821 | 0.0077 | 2.15E-26 |  | -0.1621 | 0.0133 | 3.01E-04 | 113.01 |
| rs113955098 | A | G | -0.0994 | 0.0158 | 3.38E-10 |  | -0.8177 | 0.0461 | 1.05E-04 | 39.44 |
| rs114106239 | T | C | -0.1206 | 0.0212 | 1.19E-08 |  | 0.5589 | 0.0544 | 8.65E-05 | 32.51 |
| rs11981973 | G | A | 0.0613 | 0.0098 | 4.72E-10 |  | -0.1191 | 0.0174 | 1.03E-04 | 38.79 |
| rs1228509 | C | A | 0.0471 | 0.0081 | 6.41E-09 |  | 0.5011 | 0.0140 | 8.97E-05 | 33.71 |
| rs13114985 | G | T | 0.0457 | 0.0081 | 2.01E-08 |  | -0.1423 | 0.0137 | 8.38E-05 | 31.48 |
| rs140896965 | T | C | -0.1125 | 0.0185 | 1.11E-09 |  | 0.7652 | 0.0634 | 9.88E-05 | 37.13 |
| rs2016950 | T | C | -0.0586 | 0.0107 | 4.13E-08 |  | 0.1910 | 0.0189 | 8.01E-05 | 30.09 |
| rs2370982 | T | C | 0.0515 | 0.0089 | 7.97E-09 |  | 0.3067 | 0.0159 | 8.86E-05 | 33.28 |
| rs59333125 | C | A | -0.0816 | 0.0144 | 1.32E-08 |  | 0.1177 | 0.0271 | 8.60E-05 | 32.30 |
| rs60700772 | C | T | 0.0517 | 0.0092 | 2.20E-08 |  | 0.7312 | 0.0160 | 8.33E-05 | 31.31 |
| rs61873510 | T | G | 0.0464 | 0.0084 | 3.28E-08 |  | -0.1917 | 0.0148 | 8.13E-05 | 30.53 |
| rs6484367 | A | G | 0.0468 | 0.0077 | 1.13E-09 |  | -0.2519 | 0.0134 | 9.87E-05 | 37.09 |
| rs679880 | A | G | 0.0495 | 0.0089 | 2.53E-08 |  | -0.4400 | 0.0166 | 8.26E-05 | 31.04 |
| rs76229479 | C | A | -0.0780 | 0.0131 | 2.64E-09 |  | 0.4885 | 0.0205 | 9.43E-05 | 35.44 |
| **TWEAK** |  |  |  |  |  |  |  |  |  |  |
| rs10507084 | T | C | 0.0647 | 0.0100 | 8.23E-11 |  | -0.2888 | 0.0252 | 1.12E-04 | 42.20 |
| rs10986730 | T | C | -0.0468 | 0.0077 | 1.16E-09 |  | -0.3846 | 0.0115 | 9.86E-05 | 37.03 |
| rs11075985 | A | C | 0.0821 | 0.0077 | 2.15E-26 |  | -0.2316 | 0.0115 | 3.01E-04 | 113.01 |
| rs113955098 | A | G | -0.0994 | 0.0158 | 3.38E-10 |  | 0.1438 | 0.0421 | 1.05E-04 | 39.44 |
| rs114106239 | T | C | -0.1206 | 0.0212 | 1.19E-08 |  | -0.2405 | 0.0498 | 8.65E-05 | 32.51 |
| rs11981973 | G | A | 0.0613 | 0.0098 | 4.72E-10 |  | 0.0848 | 0.0153 | 1.03E-04 | 38.79 |
| rs1228509 | C | A | 0.0471 | 0.0081 | 6.41E-09 |  | 0.1317 | 0.0124 | 8.97E-05 | 33.71 |
| rs13114985 | G | T | 0.0457 | 0.0081 | 2.01E-08 |  | -0.5079 | 0.0122 | 8.38E-05 | 31.48 |
| rs140896965 | T | C | -0.1125 | 0.0185 | 1.11E-09 |  | 0.5679 | 0.0599 | 9.88E-05 | 37.13 |
| rs2016950 | T | C | -0.0586 | 0.0107 | 4.13E-08 |  | -0.2422 | 0.0164 | 8.01E-05 | 30.09 |
| rs2370982 | T | C | 0.0515 | 0.0089 | 7.97E-09 |  | 0.0349 | 0.0140 | 8.86E-05 | 33.28 |
| rs59333125 | C | A | -0.0816 | 0.0144 | 1.32E-08 |  | 0.3211 | 0.0238 | 8.60E-05 | 32.30 |
| rs60700772 | C | T | 0.0517 | 0.0092 | 2.20E-08 |  | -0.0174 | 0.0140 | 8.33E-05 | 31.31 |
| rs61873510 | T | G | 0.0464 | 0.0084 | 3.28E-08 |  | 0.1874 | 0.0130 | 8.13E-05 | 30.53 |
| rs6484367 | A | G | 0.0468 | 0.0077 | 1.13E-09 |  | -0.0918 | 0.0118 | 9.87E-05 | 37.09 |
| rs679880 | A | G | 0.0495 | 0.0089 | 2.53E-08 |  | -0.2402 | 0.0143 | 8.26E-05 | 31.04 |
| rs76229479 | C | A | -0.0780 | 0.0131 | 2.64E-09 |  | -0.1116 | 0.0181 | 9.43E-05 | 35.44 |
| **uPA** |  |  |  |  |  |  |  |  |  |  |
| rs10507084 | T | C | 0.0647 | 0.0100 | 8.23E-11 |  | 0.2039 | 0.0252 | 1.12E-04 | 42.20 |
| rs11075985 | A | C | 0.0821 | 0.0077 | 2.15E-26 |  | 0.0414 | 0.0115 | 3.01E-04 | 113.01 |
| rs113955098 | A | G | -0.0994 | 0.0158 | 3.38E-10 |  | 0.4285 | 0.0422 | 1.05E-04 | 39.44 |
| rs114106239 | T | C | -0.1206 | 0.0212 | 1.19E-08 |  | 0.2712 | 0.0496 | 8.65E-05 | 32.51 |
| rs11981973 | G | A | 0.0613 | 0.0098 | 4.72E-10 |  | -0.1191 | 0.0152 | 1.03E-04 | 38.79 |
| rs1228509 | C | A | 0.0471 | 0.0081 | 6.41E-09 |  | 0.0319 | 0.0124 | 8.97E-05 | 33.71 |
| rs13114985 | G | T | 0.0457 | 0.0081 | 2.01E-08 |  | -0.2189 | 0.0122 | 8.38E-05 | 31.48 |
| rs140896965 | T | C | -0.1125 | 0.0185 | 1.11E-09 |  | 0.9101 | 0.0600 | 9.88E-05 | 37.13 |
| rs2016950 | T | C | -0.0586 | 0.0107 | 4.13E-08 |  | -0.1245 | 0.0164 | 8.01E-05 | 30.09 |
| rs2370982 | T | C | 0.0515 | 0.0089 | 7.97E-09 |  | 0.0175 | 0.0140 | 8.86E-05 | 33.28 |
| rs59333125 | C | A | -0.0816 | 0.0144 | 1.32E-08 |  | -0.1642 | 0.0239 | 8.60E-05 | 32.30 |
| rs60700772 | C | T | 0.0517 | 0.0092 | 2.20E-08 |  | 0.2205 | 0.0139 | 8.33E-05 | 31.31 |
| rs61873510 | T | G | 0.0464 | 0.0084 | 3.28E-08 |  | 0.4243 | 0.0130 | 8.13E-05 | 30.53 |
| rs6484367 | A | G | 0.0468 | 0.0077 | 1.13E-09 |  | -0.1580 | 0.0119 | 9.87E-05 | 37.09 |
| rs679880 | A | G | 0.0495 | 0.0089 | 2.53E-08 |  | 0.4299 | 0.0143 | 8.26E-05 | 31.04 |

**Notes:** Beta for OSA represents change in standard deviation per 1 copy of effect allele. Log(OR) for CIPs represents log(OR) change in CIPs risk per 1 copy of effect allele. F > 10 suggests sufficient strength to ensure the validity of the instrumental variable.

**Abbreviations:** log(OR), log odds ratio; se, standard error; Pval, P-value.

**Supplementary Table 5** MR estimates of OSA on 91CIPs.

|  |  |  | **Inverse variance weighted** | | | **MR Egger** | | | **Weighted median** | | | **Simple mode** | | | **Weighted mode** | | |
| --- | --- | --- | --- | --- | --- | --- | --- | --- | --- | --- | --- | --- | --- | --- | --- | --- | --- |
| **Category** | **Outcome** | **NSNP** | **OR** | **95% CI** | **Pval** | **OR** | **95% CI** | **Pval** | **OR** | **95% CI** | **Pval** | **OR** | **95% CI** | **Pval** | **OR** | **95% CI** | **Pval** |
| **Interleukins** |  |  |  |  |  |  |  |  |  |  |  |  |  |  |  |  |  |
|  | IL-1 alpha | 14 | 1.155 | (0.975-1.367) | 0.0948 | 0.621 | (0.302-1.277) | 0.2193 | 1.076 | (0.853-1.358) | 0.5350 | 1.071 | (0.743-1.543) | 0.7187 | 1.071 | (0.763-1.503) | 0.6981 |
|  | IL-2RB | 15 | 1.043 | (0.898-1.211) | 0.5823 | 1.884 | (1.047-3.389) | 0.0543 | 1.041 | (0.837-1.295) | 0.7181 | 1.098 | (0.733-1.644) | 0.6572 | 1.036 | (0.802-1.338) | 0.7890 |
|  | IL-2 | 11 | 0.910 | (0.752-1.103) | 0.3374 | 0.659 | (0.288-1.511) | 0.3505 | 0.976 | (0.770-1.239) | 0.8435 | 0.998 | (0.709-1.406) | 0.9927 | 1.007 | (0.701-1.447) | 0.9696 |
|  | IL-4 | 17 | 1.040 | (0.902-1.199) | 0.5877 | 0.950 | (0.538-1.677) | 0.8612 | 0.981 | (0.808-1.192) | 0.8502 | 0.922 | (0.629-1.353) | 0.6844 | 0.888 | (0.632-1.248) | 0.5052 |
|  | IL-5 | 17 | 1.063 | (0.922-1.225) | 0.4013 | 1.095 | (0.620-1.933) | 0.7583 | 1.043 | (0.854-1.274) | 0.6813 | 0.872 | (0.628-1.211) | 0.4262 | 1.017 | (0.768-1.345) | 0.9101 |
|  | IL-6 | 17 | 1.114 | (0.981-1.265) | 0.0955 | 1.165 | (0.652-2.082) | 0.6141 | 1.171 | (0.979-1.401) | 0.0846 | 1.162 | (0.874-1.544) | 0.3174 | 1.166 | (0.927-1.465) | 0.2082 |
|  | IL-7 | 14 | 1.036 | (0.887-1.209) | 0.6597 | 1.246 | (0.608-2.554) | 0.5587 | 1.020 | (0.837-1.243) | 0.8443 | 1.015 | (0.745-1.383) | 0.9244 | 1.009 | (0.750-1.357) | 0.9544 |
|  | IL-8 | 9 | 0.856 | (0.706-1.037) | 0.1125 | 0.840 | (0.373-1.889) | 0.6858 | 0.842 | (0.665-1.066) | 0.1531 | 0.828 | (0.577-1.189) | 0.3364 | 0.809 | (0.580-1.129) | 0.2478 |
|  | IL-10RA | 17 | 1.153 | (1.001-1.327) | 0.0478 | 1.195 | (0.680-2.100) | 0.5450 | 1.218 | (1.003-1.480) | 0.0471 | 1.137 | (0.808-1.602) | 0.4717 | 1.203 | (0.920-1.572) | 0.1955 |
|  | IL-10RB | 14 | 1.082 | (0.942-1.242) | 0.2673 | 1.175 | (0.684-2.017) | 0.5693 | 1.126 | (0.928-1.367) | 0.2297 | 1.131 | (0.850-1.504) | 0.4151 | 1.127 | (0.896-1.416) | 0.3259 |
|  | IL-10 | 17 | 1.092 | (0.962-1.240) | 0.1746 | 1.035 | (0.602-1.779) | 0.9025 | 1.181 | (0.988-1.413) | 0.0683 | 1.147 | (0.811-1.622) | 0.4500 | 1.193 | (0.927-1.536) | 0.1903 |
|  | IL-12B | 17 | 1.053 | (0.928-1.196) | 0.4196 | 0.934 | (0.501-1.741) | 0.8324 | 1.078 | (0.897-1.295) | 0.4240 | 1.064 | (0.771-1.468) | 0.7123 | 1.083 | (0.848-1.384) | 0.5327 |
|  | IL-13 | 17 | 1.091 | (0.948-1.256) | 0.2241 | 1.449 | (0.737-2.850) | 0.2990 | 1.058 | (0.863-1.296) | 0.5872 | 0.973 | (0.694-1.365) | 0.8778 | 1.006 | (0.758-1.337) | 0.9656 |
|  | IL-15RA | 17 | 1.047 | (0.913-1.201) | 0.5109 | 1.240 | (0.715-2.150) | 0.4562 | 1.070 | (0.884-1.296) | 0.4872 | 0.953 | (0.689-1.318) | 0.7736 | 1.051 | (0.812-1.361) | 0.7084 |
|  | IL-17A | 14 | 1.044 | (0.882-1.237) | 0.6147 | 0.842 | (0.417-1.699) | 0.6390 | 0.981 | (0.793-1.214) | 0.8600 | 0.950 | (0.660-1.368) | 0.7878 | 0.944 | (0.663-1.345) | 0.7540 |
|  | IL-17C | 15 | 1.135 | (0.976-1.320) | 0.1014 | 0.845 | (0.461-1.547) | 0.5941 | 1.194 | (0.974-1.463) | 0.0877 | 1.303 | (0.938-1.810) | 0.1366 | 1.254 | (0.982-1.600) | 0.0912 |
|  | IL-18R1 | 16 | 1.082 | (0.948-1.234) | 0.2417 | 1.672 | (0.978-2.860) | 0.0813 | 1.119 | (0.925-1.353) | 0.2467 | 1.134 | (0.787-1.636) | 0.5103 | 1.288 | (0.991-1.676) | 0.0782 |
|  | IL-18 | 11 | 1.190 | (0.998-1.420) | 0.0529 | 2.099 | (0.989-4.456) | 0.0856 | 1.144 | (0.916-1.430) | 0.2362 | 1.068 | (0.737-1.547) | 0.7370 | 1.077 | (0.784-1.479) | 0.6577 |
|  | IL-20RA | 17 | 1.036 | (0.899-1.193) | 0.6269 | 1.335 | (0.757-2.354) | 0.3337 | 0.968 | (0.796-1.178) | 0.7462 | 1.308 | (0.904-1.894) | 0.1734 | 0.935 | (0.699-1.250) | 0.6551 |
|  | IL-20 | 11 | 1.128 | (0.950-1.338) | 0.1697 | 0.906 | (0.476-1.725) | 0.7714 | 1.063 | (0.857-1.317) | 0.5796 | 0.934 | (0.648-1.347) | 0.7220 | 0.998 | (0.760-1.312) | 0.9894 |
|  | IL-22RA1 | 17 | 1.122 | (0.973-1.294) | 0.1131 | 1.369 | (0.775-2.418) | 0.2967 | 1.103 | (0.908-1.339) | 0.3227 | 1.173 | (0.835-1.649) | 0.3713 | 1.133 | (0.863-1.486) | 0.3818 |
|  | IL-24 | 9 | 0.838 | (0.692-1.015) | 0.0712 | 1.146 | (0.547-2.402) | 0.7291 | 0.905 | (0.711-1.152) | 0.4165 | 0.903 | (0.610-1.337) | 0.6235 | 0.931 | (0.702-1.236) | 0.6343 |
|  | IL-33 | 8 | 1.140 | (0.944-1.376) | 0.1734 | 1.316 | (0.642-2.699) | 0.4818 | 1.150 | (0.904-1.464) | 0.2558 | 1.143 | (0.844-1.548) | 0.4158 | 1.141 | (0.856-1.520) | 0.3986 |
| **Chemokines** |  |  |  |  |  |  |  |  |  |  |  |  |  |  |  |  |  |
|  | CXCL1 | 12 | 1.106 | (0.939-1.304) | 0.2289 | 1.158 | (0.558-2.402) | 0.7019 | 1.108 | (0.899-1.365) | 0.3353 | 1.225 | (0.872-1.719) | 0.2662 | 0.992 | (0.741-1.329) | 0.9579 |
|  | CXCL5 | 16 | 0.972 | (0.843-1.121) | 0.6984 | 0.736 | (0.387-1.399) | 0.3660 | 0.934 | (0.772-1.130) | 0.4851 | 0.915 | (0.673-1.243) | 0.5776 | 0.920 | (0.672-1.259) | 0.6089 |
|  | CXCL6 | 11 | 0.895 | (0.756-1.059) | 0.1959 | 1.314 | (0.634-2.722) | 0.4812 | 0.874 | (0.705-1.085) | 0.2221 | 0.823 | (0.607-1.116) | 0.2379 | 0.809 | (0.586-1.116) | 0.2261 |
|  | CXCL9 | 17 | 0.888 | (0.785-1.004) | 0.0575 | 0.983 | (0.600-1.610) | 0.9468 | 0.920 | (0.781-1.084) | 0.3180 | 0.885 | (0.675-1.158) | 0.3858 | 0.931 | (0.746-1.162) | 0.5354 |
|  | CXCL10 | 11 | 0.913 | (0.784-1.063) | 0.2426 | 1.074 | (0.596-1.934) | 0.8174 | 0.925 | (0.763-1.123) | 0.4306 | 0.923 | (0.687-1.240) | 0.6065 | 0.992 | (0.784-1.256) | 0.9493 |
|  | CXCL11 | 11 | 1.118 | (0.958-1.305) | 0.1567 | 1.124 | (0.624-2.025) | 0.7050 | 1.112 | (0.909-1.361) | 0.3014 | 1.033 | (0.790-1.351) | 0.8177 | 1.074 | (0.842-1.368) | 0.5787 |
|  | CCL2 | 13 | 0.898 | (0.767-1.051) | 0.1799 | 1.426 | (0.750-2.711) | 0.3026 | 0.862 | (0.704-1.056) | 0.1525 | 0.784 | (0.575-1.069) | 0.1494 | 0.778 | (0.567-1.069) | 0.1478 |
|  | CCL4 | 11 | 1.070 | (0.901-1.270) | 0.4429 | 0.929 | (0.455-1.899) | 0.8454 | 1.079 | (0.869-1.340) | 0.4908 | 1.010 | (0.736-1.388) | 0.9502 | 1.086 | (0.802-1.471) | 0.6047 |
|  | CCL7 | 17 | 1.084 | (0.941-1.249) | 0.2634 | 1.461 | (0.830-2.572) | 0.2083 | 1.160 | (0.958-1.404) | 0.1289 | 1.207 | (0.865-1.686) | 0.2848 | 1.189 | (0.905-1.564) | 0.2321 |
|  | CCL8 | 13 | 1.040 | (0.889-1.217) | 0.6268 | 0.970 | (0.465-2.022) | 0.9362 | 1.059 | (0.876-1.280) | 0.5546 | 1.053 | (0.789-1.406) | 0.7307 | 1.063 | (0.809-1.395) | 0.6699 |
|  | CCL11 | 17 | 0.927 | (0.818-1.051) | 0.2351 | 1.273 | (0.740-2.192) | 0.3967 | 0.979 | (0.825-1.163) | 0.8117 | 0.971 | (0.723-1.303) | 0.8448 | 0.983 | (0.771-1.253) | 0.8932 |
|  | CCL13 | 17 | 1.089 | (0.959-1.236) | 0.1875 | 1.781 | (1.071-2.962) | 0.0418 | 1.025 | (0.867-1.212) | 0.7687 | 0.969 | (0.742-1.266) | 0.8223 | 1.008 | (0.796-1.278) | 0.9473 |
|  | CCL19 | 17 | 1.058 | (0.931-1.203) | 0.3865 | 0.888 | (0.530-1.485) | 0.6564 | 0.995 | (0.830-1.192) | 0.9572 | 1.172 | (0.836-1.642) | 0.3720 | 1.107 | (0.846-1.450) | 0.4692 |
|  | CCL20 | 15 | 1.067 | (0.931-1.223) | 0.3531 | 0.800 | (0.473-1.354) | 0.4210 | 1.045 | (0.864-1.262) | 0.6519 | 0.993 | (0.722-1.366) | 0.9682 | 1.042 | (0.811-1.338) | 0.7527 |
|  | CCL23 | 15 | 0.935 | (0.807-1.083) | 0.3690 | 1.038 | (0.539-1.998) | 0.9139 | 1.038 | (0.838-1.286) | 0.7341 | 1.134 | (0.738-1.742) | 0.5745 | 1.142 | (0.746-1.748) | 0.5517 |
|  | CCL25 | 14 | 1.092 | (0.951-1.254) | 0.2109 | 0.893 | (0.511-1.561) | 0.6991 | 1.055 | (0.866-1.285) | 0.5966 | 1.004 | (0.764-1.319) | 0.9789 | 1.047 | (0.846-1.298) | 0.6785 |
|  | CCL28 | 17 | 0.875 | (0.774-0.988) | 0.0317 | 0.747 | (0.457-1.221) | 0.2626 | 0.872 | (0.735-1.034) | 0.1155 | 0.898 | (0.688-1.174) | 0.4428 | 0.895 | (0.717-1.118) | 0.3431 |
|  | CX3CL1 | 17 | 0.917 | (0.809-1.040) | 0.1770 | 0.648 | (0.365-1.149) | 0.1580 | 0.864 | (0.720-1.036) | 0.1150 | 0.867 | (0.615-1.222) | 0.4261 | 0.798 | (0.616-1.033) | 0.1057 |
|  | MIP-1 alpha | 16 | 1.053 | (0.914-1.213) | 0.4737 | 0.956 | (0.507-1.804) | 0.8925 | 1.023 | (0.856-1.224) | 0.7998 | 1.003 | (0.744-1.354) | 0.9833 | 0.993 | (0.758-1.301) | 0.9583 |
| **Growth factors** |  |  |  |  |  |  |  |  |  |  |  |  |  |  |  |  |  |
|  | Beta-NGF | 14 | 1.048 | (0.902-1.218) | 0.5371 | 0.961 | (0.498-1.854) | 0.9074 | 1.091 | (0.897-1.327) | 0.3844 | 1.138 | (0.854-1.516) | 0.3939 | 1.128 | (0.839-1.516) | 0.4400 |
|  | DNER | 17 | 0.874 | (0.772-0.989) | 0.0324 | 1.008 | (0.613-1.658) | 0.9751 | 0.811 | (0.692-0.952) | 0.0102 | 0.816 | (0.650-1.026) | 0.1011 | 0.814 | (0.651-1.018) | 0.0898 |
|  | FGF-5 | 15 | 1.034 | (0.894-1.196) | 0.6503 | 0.944 | (0.544-1.637) | 0.8396 | 1.109 | (0.910-1.351) | 0.3039 | 1.102 | (0.822-1.479) | 0.5257 | 1.126 | (0.884-1.434) | 0.3545 |
|  | FGF-19 | 17 | 0.948 | (0.835-1.078) | 0.4169 | 0.688 | (0.411-1.149) | 0.1734 | 0.938 | (0.786-1.120) | 0.4790 | 0.840 | (0.618-1.140) | 0.2797 | 0.886 | (0.691-1.138) | 0.3574 |
|  | FGF-21 | 13 | 0.846 | (0.725-0.988) | 0.0344 | 0.592 | (0.299-1.172) | 0.1608 | 0.927 | (0.751-1.144) | 0.4792 | 0.950 | (0.669-1.347) | 0.7775 | 0.947 | (0.685-1.308) | 0.7453 |
|  | FGF-23 | 17 | 1.084 | (0.958-1.227) | 0.1989 | 1.160 | (0.705-1.909) | 0.5679 | 1.184 | (1.003-1.398) | 0.0457 | 1.155 | (0.856-1.560) | 0.3593 | 1.155 | (0.901-1.481) | 0.2710 |
|  | HGF | 16 | 0.952 | (0.828-1.094) | 0.4865 | 0.786 | (0.421-1.468) | 0.4625 | 0.937 | (0.782-1.123) | 0.4793 | 0.869 | (0.640-1.178) | 0.3796 | 0.861 | (0.643-1.153) | 0.3313 |
|  | LAP TGF-beta-1 | 16 | 0.967 | (0.839-1.113) | 0.6362 | 0.932 | (0.494-1.759) | 0.8317 | 0.940 | (0.789-1.120) | 0.4872 | 0.872 | (0.672-1.130) | 0.3152 | 0.890 | (0.672-1.180) | 0.4303 |
|  | TGF-alpha | 17 | 1.034 | (0.911-1.174) | 0.6027 | 0.952 | (0.573-1.582) | 0.8514 | 1.022 | (0.860-1.215) | 0.8055 | 0.917 | (0.661-1.272) | 0.6112 | 1.088 | (0.847-1.399) | 0.5185 |
|  | VEGF_A | 14 | 1.050 | (0.900-1.225) | 0.5345 | 0.611 | (0.314-1.191) | 0.1738 | 1.056 | (0.865-1.290) | 0.5918 | 1.098 | (0.798-1.510) | 0.5769 | 1.110 | (0.810-1.520) | 0.5268 |
|  | SCF | 15 | 0.948 | (0.829-1.085) | 0.4391 | 0.791 | (0.474-1.321) | 0.3865 | 0.911 | (0.759-1.094) | 0.3197 | 0.874 | (0.664-1.151) | 0.3547 | 0.899 | (0.703-1.150) | 0.4127 |
|  | ARTN | 13 | 1.124 | (0.957-1.320) | 0.1540 | 1.272 | (0.712-2.275) | 0.4339 | 1.120 | (0.897-1.400) | 0.3169 | 1.051 | (0.771-1.433) | 0.7586 | 1.092 | (0.847-1.408) | 0.5096 |
|  | CSF-1 | 11 | 0.842 | (0.715-0.992) | 0.0396 | 1.063 | (0.529-2.138) | 0.8678 | 0.927 | (0.742-1.159) | 0.5069 | 1.025 | (0.706-1.486) | 0.9010 | 0.996 | (0.718-1.382) | 0.9805 |
|  | Flt3L | 12 | 0.900 | (0.769-1.053) | 0.1887 | 1.129 | (0.524-2.432) | 0.7634 | 0.879 | (0.715-1.080) | 0.2207 | 0.953 | (0.707-1.284) | 0.7567 | 0.958 | (0.720-1.274) | 0.7731 |
|  | hGDNF | 13 | 1.099 | (0.955-1.265) | 0.1884 | 1.061 | (0.610-1.845) | 0.8379 | 1.060 | (0.882-1.275) | 0.5314 | 1.047 | (0.799-1.370) | 0.7463 | 1.044 | (0.836-1.303) | 0.7107 |
|  | LIF | 17 | 1.145 | (0.995-1.318) | 0.0586 | 1.147 | (0.624-2.110) | 0.6651 | 1.234 | (1.005-1.515) | 0.0442 | 1.251 | (0.844-1.856) | 0.2812 | 1.303 | (0.958-1.771) | 0.1108 |
|  | LIF-R | 14 | 1.059 | (0.911-1.231) | 0.4561 | 1.387 | (0.774-2.484) | 0.2933 | 1.048 | (0.848-1.295) | 0.6629 | 1.098 | (0.827-1.458) | 0.5278 | 1.073 | (0.837-1.376) | 0.5888 |
|  | NRTN | 17 | 1.063 | (0.925-1.222) | 0.3913 | 1.762 | (1.008-3.082) | 0.0655 | 1.109 | (0.916-1.343) | 0.2904 | 1.122 | (0.794-1.586) | 0.5240 | 1.137 | (0.842-1.536) | 0.4133 |
|  | NT-3 | 17 | 1.105 | (0.974-1.252) | 0.1208 | 1.737 | (1.048-2.879) | 0.0490 | 1.135 | (0.961-1.340) | 0.1346 | 1.103 | (0.830-1.465) | 0.5092 | 1.129 | (0.889-1.435) | 0.3348 |
| **Others** |  |  |  |  |  |  |  |  |  |  |  |  |  |  |  |  |  |
|  | 4EBP1 | 9 | 1.197 | (0.980-1.462) | 0.0777 | 1.870 | (0.870-4.018) | 0.1526 | 1.137 | (0.887-1.456) | 0.3115 | 1.114 | (0.773-1.605) | 0.5790 | 1.087 | (0.806-1.464) | 0.6004 |
|  | ADA | 8 | 0.853 | (0.705-1.031) | 0.1002 | 1.063 | (0.451-2.502) | 0.8935 | 0.870 | (0.687-1.101) | 0.2462 | 0.864 | (0.610-1.224) | 0.4378 | 0.867 | (0.616-1.222) | 0.4424 |
|  | AXIN1 | 17 | 1.093 | (0.949-1.259) | 0.2189 | 1.537 | (0.872-2.708) | 0.1577 | 1.136 | (0.946-1.364) | 0.1732 | 1.116 | (0.822-1.514) | 0.4919 | 1.155 | (0.886-1.505) | 0.3030 |
|  | CASP-8 | 14 | 0.954 | (0.820-1.110) | 0.5400 | 1.113 | (0.577-2.148) | 0.7553 | 1.021 | (0.843-1.237) | 0.8308 | 1.090 | (0.777-1.530) | 0.6269 | 1.087 | (0.787-1.502) | 0.6213 |
|  | CD5 | 11 | 1.148 | (0.985-1.339) | 0.0783 | 1.521 | (0.836-2.768) | 0.2030 | 1.092 | (0.901-1.323) | 0.3718 | 1.082 | (0.834-1.405) | 0.5669 | 1.087 | (0.863-1.368) | 0.4949 |
|  | CD6 | 13 | 0.925 | (0.794-1.078) | 0.3186 | 1.162 | (0.487-2.773) | 0.7418 | 1.096 | (0.880-1.366) | 0.4125 | 1.142 | (0.810-1.610) | 0.4646 | 1.135 | (0.810-1.593) | 0.4758 |
|  | CD40 | 16 | 0.963 | (0.838-1.107) | 0.5971 | 0.935 | (0.500-1.749) | 0.8369 | 1.027 | (0.851-1.239) | 0.7839 | 1.094 | (0.773-1.548) | 0.6185 | 1.076 | (0.770-1.504) | 0.6729 |
|  | CD244 | 13 | 1.084 | (0.940-1.251) | 0.2686 | 1.347 | (0.777-2.335) | 0.3117 | 1.063 | (0.880-1.284) | 0.5287 | 1.100 | (0.836-1.447) | 0.5098 | 1.072 | (0.850-1.353) | 0.5670 |
|  | CDCP1 | 15 | 1.040 | (0.912-1.185) | 0.5620 | 1.179 | (0.713-1.951) | 0.5324 | 1.075 | (0.904-1.279) | 0.4144 | 1.140 | (0.858-1.515) | 0.3825 | 1.075 | (0.868-1.332) | 0.5164 |
|  | CST5 | 13 | 0.926 | (0.794-1.080) | 0.3267 | 0.705 | (0.344-1.447) | 0.3616 | 0.912 | (0.738-1.128) | 0.3951 | 0.762 | (0.518-1.119) | 0.1908 | 0.802 | (0.562-1.143) | 0.2452 |
|  | EN-RAGE | 17 | 0.967 | (0.852-1.098) | 0.6066 | 0.848 | (0.508-1.415) | 0.5368 | 0.908 | (0.766-1.077) | 0.2693 | 0.909 | (0.688-1.202) | 0.5137 | 0.896 | (0.716-1.122) | 0.3537 |
|  | IFN-gamma | 17 | 1.064 | (0.926-1.223) | 0.3797 | 0.853 | (0.489-1.488) | 0.5847 | 1.014 | (0.839-1.226) | 0.8846 | 1.035 | (0.758-1.413) | 0.8324 | 1.002 | (0.770-1.303) | 0.9908 |
|  | MMP-1 | 17 | 0.931 | (0.819-1.058) | 0.2726 | 0.739 | (0.442-1.236) | 0.2667 | 0.953 | (0.804-1.128) | 0.5728 | 0.902 | (0.672-1.211) | 0.5022 | 0.962 | (0.756-1.224) | 0.7559 |
|  | MMP-10 | 17 | 0.928 | (0.817-1.054) | 0.2520 | 0.653 | (0.363-1.175) | 0.1753 | 0.913 | (0.753-1.106) | 0.3515 | 1.188 | (0.786-1.796) | 0.4258 | 0.857 | (0.632-1.162) | 0.3353 |
|  | OPG | 17 | 0.942 | (0.835-1.063) | 0.3338 | 1.093 | (0.632-1.889) | 0.7548 | 0.959 | (0.808-1.138) | 0.6289 | 0.768 | (0.559-1.057) | 0.1246 | 0.771 | (0.591-1.007) | 0.0746 |
|  | OSM | 13 | 1.108 | (0.943-1.302) | 0.2145 | 0.801 | (0.409-1.569) | 0.5316 | 1.072 | (0.871-1.318) | 0.5127 | 1.180 | (0.869-1.604) | 0.3104 | 1.061 | (0.795-1.416) | 0.6939 |
|  | PD-L1 | 14 | 0.956 | (0.820-1.114) | 0.5620 | 1.068 | (0.554-2.059) | 0.8472 | 0.929 | (0.762-1.133) | 0.4683 | 0.950 | (0.699-1.291) | 0.7467 | 0.930 | (0.697-1.239) | 0.6268 |
|  | SIRT2 | 16 | 1.084 | (0.952-1.235) | 0.2229 | 1.710 | (1.026-2.851) | 0.0589 | 1.054 | (0.883-1.258) | 0.5621 | 0.947 | (0.703-1.278) | 0.7285 | 0.965 | (0.759-1.227) | 0.7746 |
|  | SLAMF1 | 12 | 1.118 | (0.962-1.298) | 0.1454 | 1.363 | (0.779-2.385) | 0.3028 | 1.157 | (0.945-1.417) | 0.1584 | 1.151 | (0.819-1.616) | 0.4352 | 1.166 | (0.888-1.532) | 0.2931 |
|  | ST1A1 | 17 | 0.960 | (0.831-1.107) | 0.5718 | 1.475 | (0.831-2.620) | 0.2041 | 0.963 | (0.788-1.176) | 0.7117 | 0.821 | (0.569-1.184) | 0.3071 | 0.988 | (0.746-1.310) | 0.9358 |
|  | STAMPB | 11 | 0.912 | (0.776-1.072) | 0.2645 | 1.203 | (0.534-2.713) | 0.6660 | 0.923 | (0.754-1.129) | 0.4352 | 0.947 | (0.709-1.264) | 0.7185 | 0.947 | (0.701-1.279) | 0.7286 |
|  | TNF | 9 | 1.195 | (0.989-1.443) | 0.0650 | 1.609 | (0.806-3.213) | 0.2194 | 1.136 | (0.894-1.445) | 0.2971 | 1.149 | (0.822-1.606) | 0.4411 | 1.142 | (0.889-1.468) | 0.3295 |
|  | TNFB | 12 | 1.186 | (0.984-1.430) | 0.0732 | 1.198 | (0.538-2.667) | 0.6679 | 1.153 | (0.902-1.474) | 0.2563 | 1.064 | (0.726-1.561) | 0.7555 | 1.064 | (0.777-1.457) | 0.7044 |
|  | TNFRSF9 | 17 | 1.060 | (0.920-1.220) | 0.4199 | 1.122 | (0.635-1.983) | 0.6964 | 1.143 | (0.938-1.392) | 0.1845 | 1.332 | (0.925-1.917) | 0.1431 | 1.186 | (0.901-1.562) | 0.2418 |
|  | TNFSF14 | 11 | 1.143 | (0.940-1.389) | 0.1811 | 1.223 | (0.578-2.585) | 0.6114 | 1.152 | (0.903-1.471) | 0.2541 | 1.278 | (0.867-1.882) | 0.2433 | 1.207 | (0.836-1.743) | 0.3391 |
|  | TRAIL | 17 | 1.088 | (0.959-1.234) | 0.1895 | 1.509 | (0.865-2.633) | 0.1680 | 1.184 | (0.998-1.405) | 0.0526 | 1.207 | (0.879-1.657) | 0.2623 | 1.249 | (0.983-1.587) | 0.0877 |
|  | TRANCE | 17 | 1.051 | (0.926-1.193) | 0.4412 | 1.478 | (0.888-2.460) | 0.1536 | 1.041 | (0.885-1.224) | 0.6260 | 1.028 | (0.803-1.316) | 0.8307 | 1.055 | (0.848-1.311) | 0.6381 |
|  | TSLP | 17 | 1.054 | (0.914-1.215) | 0.4674 | 1.179 | (0.567-2.453) | 0.6659 | 0.870 | (0.708-1.069) | 0.1858 | 0.881 | (0.567-1.370) | 0.5816 | 0.866 | (0.655-1.145) | 0.3284 |
|  | TWEAK | 17 | 0.900 | (0.794-1.021) | 0.1011 | 0.999 | (0.603-1.656) | 0.9980 | 0.881 | (0.749-1.037) | 0.1292 | 0.828 | (0.613-1.119) | 0.2368 | 0.825 | (0.643-1.059) | 0.1503 |
|  | uPA | 15 | 1.069 | (0.934-1.224) | 0.3332 | 1.208 | (0.700-2.083) | 0.5089 | 1.036 | (0.864-1.243) | 0.7019 | 0.950 | (0.714-1.264) | 0.7310 | 0.981 | (0.786-1.225) | 0.8700 |

**Note:** OR and 95% CI represent the change in the odds ratio of CIPs level per 1 SD increase in OSA.

**Abbreviations:** SNPs, single nucleotide polymorphisms; OR, Odds Ratio; CI, Confidence interval; Pval, P-value.

**Supplementary Table 6** Heterogeneity and horizontal pleiotropy analyses of OSA on 91 CIPs.

| **Category** | **Outcomes** | **Q1** | **Q1 Pval** | **Q2** | **Q2 Pval** | **I2** | **intercept** | **intercept Pval** | **MR PRESSO**  **Global Test Pval** |
| --- | --- | --- | --- | --- | --- | --- | --- | --- | --- |
| **Interleukins** |  |  |  |  |  |  |  |  |  |
|  | IL-1 alpha | 12.589 | 0.3996 | 15.757 | 0.2625 | 17.5% | 0.0356 | 0.1078 | 0.246 |
|  | IL-2RB | 13.331 | 0.4226 | 17.614 | 0.2249 | 20.5% | -0.0369 | 0.0618 | 0.251 |
|  | IL-2 | 1.148 | 0.9990 | 1.763 | 0.9979 | 0.0% | 0.0184 | 0.4531 | 0.997 |
|  | IL-4 | 11.448 | 0.7203 | 11.552 | 0.7742 | 0.0% | 0.0055 | 0.7507 | 0.736 |
|  | IL-5 | 11.824 | 0.6923 | 11.836 | 0.7552 | 0.0% | -0.0018 | 0.9162 | 0.762 |
|  | IL-6 | 19.543 | 0.1902 | 19.575 | 0.2400 | 18.3% | -0.0027 | 0.8782 | 0.247 |
|  | IL-7 | 3.393 | 0.9921 | 3.661 | 0.9943 | 0.0% | -0.0102 | 0.6135 | 0.998 |
|  | IL-8 | 2.144 | 0.9515 | 2.146 | 0.9762 | 0.0% | 0.0012 | 0.9640 | 0.983 |
|  | IL-10RA | 12.644 | 0.6298 | 12.660 | 0.6974 | 0.0% | -0.0022 | 0.8987 | 0.704 |
|  | IL-10RB | 6.917 | 0.8631 | 7.014 | 0.9014 | 0.0% | -0.0050 | 0.7609 | 0.916 |
|  | IL-10 | 16.810 | 0.3303 | 16.856 | 0.3950 | 5.1% | 0.0032 | 0.8436 | 0.389 |
|  | IL-12B | 22.428 | 0.0971 | 22.657 | 0.1232 | 29.4% | 0.0072 | 0.7008 | 0.134 |
|  | IL-13 | 21.663 | 0.1169 | 22.706 | 0.1218 | 29.5% | -0.0171 | 0.4087 | 0.129 |
|  | IL-15RA | 13.068 | 0.5971 | 13.453 | 0.6394 | 0.0% | -0.0102 | 0.5441 | 0.663 |
|  | IL-17A | 5.718 | 0.9296 | 6.103 | 0.9423 | 0.0% | 0.0123 | 0.5464 | 0.949 |
|  | IL-17C | 7.967 | 0.8458 | 8.942 | 0.8347 | 0.0% | 0.0178 | 0.3414 | 0.879 |
|  | IL-18R1 | 9.977 | 0.7639 | 12.671 | 0.6277 | 0.0% | -0.0257 | 0.1230 | 0.550 |
|  | IL-18 | 1.858 | 0.9935 | 4.165 | 0.9396 | 0.0% | -0.0331 | 0.1631 | 0.941 |
|  | IL-20RA | 9.962 | 0.8221 | 10.783 | 0.8227 | 0.0% | -0.0153 | 0.3791 | 0.821 |
|  | IL-20 | 5.081 | 0.8272 | 5.557 | 0.8510 | 0.0% | 0.0134 | 0.5077 | 0.846 |
|  | IL-22RA1 | 13.421 | 0.5698 | 13.921 | 0.6046 | 0.0% | -0.0120 | 0.4904 | 0.645 |
|  | IL-24 | 2.777 | 0.9048 | 3.513 | 0.8982 | 0.0% | -0.0206 | 0.4194 | 0.878 |
|  | IL-33 | 1.356 | 0.9685 | 1.522 | 0.9815 | 0.0% | -0.0090 | 0.6983 | 0.983 |
| **Chemokines** |  |  |  |  |  |  |  |  |  |
|  | CXCL1 | 1.962 | 0.9966 | 1.978 | 0.9986 | 0.0% | -0.0025 | 0.9023 | 0.998 |
|  | CXCL5 | 9.271 | 0.8133 | 10.028 | 0.8180 | 0.0% | 0.0156 | 0.3990 | 0.822 |
|  | CXCL6 | 2.766 | 0.9728 | 3.897 | 0.9519 | 0.0% | -0.0222 | 0.3153 | 0.950 |
|  | CXCL9 | 10.541 | 0.7844 | 10.716 | 0.8267 | 0.0% | -0.0061 | 0.6820 | 0.833 |
|  | CXCL10 | 1.664 | 0.9957 | 1.976 | 0.9965 | 0.0% | -0.0103 | 0.5898 | 0.991 |
|  | CXCL11 | 4.399 | 0.8833 | 4.399 | 0.9275 | 0.0% | -0.0004 | 0.9847 | 0.932 |
|  | CCL2 | 2.371 | 0.9967 | 4.490 | 0.9729 | 0.0% | -0.0263 | 0.1734 | 0.981 |
|  | CCL4 | 2.295 | 0.9859 | 2.453 | 0.9915 | 0.0% | 0.0080 | 0.7007 | 0.992 |
|  | CCL7 | 8.770 | 0.8893 | 9.913 | 0.8711 | 0.0% | -0.0180 | 0.3019 | 0.873 |
|  | CCL8 | 0.789 | 1.0000 | 0.825 | 1.0000 | 0.0% | 0.0039 | 0.8526 | 1.000 |
|  | CCL11 | 17.430 | 0.2938 | 19.059 | 0.2656 | 16.1% | -0.0191 | 0.2548 | 0.279 |
|  | CCL13 | 6.689 | 0.9657 | 10.529 | 0.8376 | 0.0% | -0.0295 | 0.0689 | 0.850 |
|  | CCL19 | 13.702 | 0.5482 | 14.179 | 0.5854 | 0.0% | 0.0105 | 0.5003 | 0.594 |
|  | CCL20 | 7.913 | 0.8492 | 9.145 | 0.8216 | 0.0% | 0.0176 | 0.2870 | 0.863 |
|  | CCL23 | 13.366 | 0.4200 | 13.471 | 0.4898 | 0.0% | -0.0059 | 0.7540 | 0.471 |
|  | CCL25 | 9.532 | 0.6569 | 10.063 | 0.6888 | 0.0% | 0.0124 | 0.4804 | 0.705 |
|  | CCL28 | 12.875 | 0.6119 | 13.298 | 0.6508 | 0.0% | 0.0095 | 0.5254 | 0.653 |
|  | CX3CL1 | 19.375 | 0.1972 | 21.327 | 0.1663 | 25.0% | 0.0209 | 0.2378 | 0.154 |
|  | MIP-1 alpha | 2.927 | 0.9992 | 3.021 | 0.9996 | 0.0% | 0.0054 | 0.7647 | 1.000 |
| **Growth factors** |  |  |  |  |  |  |  |  |  |
|  | Beta-NGF | 9.210 | 0.6849 | 9.281 | 0.7514 | 0.0% | 0.0051 | 0.7941 | 0.750 |
|  | DNER | 8.293 | 0.9115 | 8.631 | 0.9278 | 0.0% | -0.0086 | 0.5698 | 0.934 |
|  | FGF-5 | 9.042 | 0.7697 | 9.157 | 0.8209 | 0.0% | 0.0056 | 0.7405 | 0.862 |
|  | FGF-19 | 10.101 | 0.8134 | 11.707 | 0.7639 | 0.0% | 0.0193 | 0.2244 | 0.772 |
|  | FGF-21 | 9.310 | 0.5933 | 10.415 | 0.5796 | 0.0% | 0.0201 | 0.3156 | 0.580 |
|  | FGF-23 | 13.105 | 0.5942 | 13.180 | 0.6596 | 0.0% | -0.0041 | 0.7880 | 0.675 |
|  | HGF | 6.762 | 0.9435 | 7.140 | 0.9536 | 0.0% | 0.0108 | 0.5480 | 0.966 |
|  | LAP TGF-beta-1 | 3.895 | 0.9961 | 3.908 | 0.9980 | 0.0% | 0.0020 | 0.9107 | 1.000 |
|  | TGF-alpha | 10.464 | 0.7896 | 10.573 | 0.8350 | 0.0% | 0.0050 | 0.7456 | 0.819 |
|  | VEGF_A | 2.190 | 0.9991 | 4.859 | 0.9782 | 0.0% | 0.0316 | 0.1283 | 0.987 |
|  | SCF | 4.233 | 0.9884 | 4.749 | 0.9890 | 0.0% | 0.0109 | 0.4856 | 0.995 |
|  | ARTN | 4.107 | 0.9667 | 4.297 | 0.9775 | 0.0% | -0.0078 | 0.6719 | 0.982 |
|  | CSF-1 | 8.226 | 0.5116 | 8.677 | 0.5630 | 0.0% | -0.0133 | 0.5188 | 0.557 |
|  | Flt3L | 5.558 | 0.8510 | 5.907 | 0.8795 | 0.0% | -0.0123 | 0.5678 | 0.882 |
|  | hGDNF | 4.139 | 0.9657 | 4.155 | 0.9805 | 0.0% | 0.0022 | 0.8993 | 0.986 |
|  | LIF | 17.554 | 0.2868 | 17.554 | 0.3506 | 8.9% | -0.0001 | 0.9954 | 0.362 |
|  | LIF-R | 6.509 | 0.8883 | 7.390 | 0.8809 | 0.0% | -0.0171 | 0.3663 | 0.901 |
|  | NRTN | 8.843 | 0.8856 | 12.195 | 0.7304 | 0.0% | -0.0305 | 0.0870 | 0.717 |
|  | NT-3 | 7.271 | 0.9497 | 10.561 | 0.8357 | 0.0% | -0.0272 | 0.0897 | 0.838 |
| **Others** |  |  |  |  |  |  |  |  |  |
|  | 4EBP1 | 2.676 | 0.9133 | 4.078 | 0.8500 | 0.0% | -0.0270 | 0.2749 | 0.866 |
|  | ADA | 0.915 | 0.9886 | 1.182 | 0.9913 | 0.0% | -0.0127 | 0.6235 | 0.992 |
|  | AXIN1 | 12.149 | 0.6677 | 13.635 | 0.6259 | 0.0% | -0.0205 | 0.2417 | 0.640 |
|  | CASP-8 | 5.077 | 0.9554 | 5.300 | 0.9680 | 0.0% | -0.0085 | 0.6449 | 0.975 |
|  | CD5 | 2.598 | 0.9781 | 3.506 | 0.9669 | 0.0% | -0.0184 | 0.3656 | 0.972 |
|  | CD6 | 13.112 | 0.2861 | 13.438 | 0.3380 | 10.7% | -0.0123 | 0.6113 | 0.318 |
|  | CD40 | 11.712 | 0.6294 | 11.721 | 0.7000 | 0.0% | 0.0017 | 0.9257 | 0.701 |
|  | CD244 | 4.958 | 0.9332 | 5.598 | 0.9350 | 0.0% | -0.0139 | 0.4406 | 0.949 |
|  | CDCP1 | 3.554 | 0.9951 | 3.812 | 0.9965 | 0.0% | -0.0077 | 0.6200 | 0.996 |
|  | CST5 | 13.432 | 0.2660 | 14.143 | 0.2917 | 15.2% | 0.0152 | 0.4614 | 0.312 |
|  | EN-RAGE | 15.082 | 0.4456 | 15.354 | 0.4989 | 0.0% | 0.0079 | 0.6102 | 0.533 |
|  | IFN-gamma | 13.578 | 0.5578 | 14.223 | 0.5821 | 0.0% | 0.0133 | 0.4345 | 0.607 |
|  | MMP-1 | 11.511 | 0.7156 | 12.338 | 0.7204 | 0.0% | 0.0139 | 0.3775 | 0.692 |
|  | MMP-10 | 19.786 | 0.1803 | 21.726 | 0.1523 | 26.4% | 0.0211 | 0.2440 | 0.153 |
|  | OPG | 19.076 | 0.2103 | 19.460 | 0.2456 | 17.8% | -0.0089 | 0.5911 | 0.252 |
|  | OSM | 3.374 | 0.9848 | 4.320 | 0.9769 | 0.0% | 0.0188 | 0.3516 | 0.983 |
|  | PD-L1 | 7.334 | 0.8348 | 7.451 | 0.8775 | 0.0% | -0.0063 | 0.7387 | 0.878 |
|  | SIRT2 | 4.382 | 0.9927 | 7.642 | 0.9373 | 0.0% | -0.0276 | 0.0925 | 0.945 |
|  | SLAMF1 | 6.765 | 0.7474 | 7.287 | 0.7754 | 0.0% | -0.0123 | 0.4863 | 0.808 |
|  | ST1A1 | 13.317 | 0.5778 | 15.619 | 0.4799 | 0.0% | -0.0259 | 0.1500 | 0.500 |
|  | STAMPB | 1.820 | 0.9940 | 2.285 | 0.9937 | 0.0% | -0.0149 | 0.5124 | 0.993 |
|  | TNF | 2.876 | 0.8962 | 3.647 | 0.8875 | 0.0% | -0.0191 | 0.4092 | 0.897 |
|  | TNFB | 2.242 | 0.9941 | 2.242 | 0.9974 | 0.0% | -0.0005 | 0.9810 | 0.996 |
|  | TNFRSF9 | 15.218 | 0.4358 | 15.260 | 0.5057 | 0.0% | -0.0035 | 0.8409 | 0.518 |
|  | TNFSF14 | 2.551 | 0.9795 | 2.584 | 0.9896 | 0.0% | -0.0041 | 0.8584 | 0.988 |
|  | TRAIL | 18.042 | 0.2605 | 19.741 | 0.2321 | 19.0% | -0.0196 | 0.2530 | 0.218 |
|  | TRANCE | 10.271 | 0.8023 | 12.104 | 0.7368 | 0.0% | -0.0204 | 0.1958 | 0.776 |
|  | TSLP | 24.814 | 0.0525 | 24.972 | 0.0703 | 35.9% | -0.0067 | 0.7615 | 0.076 |
|  | TWEAK | 11.929 | 0.6844 | 12.103 | 0.7368 | 0.0% | -0.0063 | 0.6821 | 0.736 |
|  | uPA | 10.595 | 0.6447 | 10.800 | 0.7017 | 0.0% | -0.0073 | 0.6582 | 0.746 |

**Abbreviations:** Q, Cochran Q statistics; Q1, Q test from MR Egger method; Q1 Pval, P-value of Q test from MR Egger method; Q2, Q test from inverse variance weighted method; Q2 Pval, P-value of Q test from inverse variance weighted method; Pval, P-value.
